# Supplementary material for: Allosteric coupling asymmetry mediates paradoxical activation of BRAF by type II inhibitors
Source: eLife journal article supplement (doi:10.7554/elife.95481), 2024-04-03
Supplement: fig1-figsupp1-data1 [file Figure1_figure supplement 1 - source data 1.xlsx]

## Sheet: Sheet1
b		anisotropy
	time (s)	K547C BRAF	WT BRAF
	0	0.035527	0.023784
	8.409	0.041953	0.026794
	16.833	0.04603	0.023267
	25.241	0.052039	0.025144
	33.665	0.055744	0.028355
	42.089	0.060334	0.025991
	50.529	0.064633	0.025903
	58.937	0.066267	0.026654
	67.346	0.070605	0.027028
	75.754	0.073787	0.026887
	84.163	0.075164	0.027483
	92.571	0.07823	0.026882
	100.98	0.080697	0.026713
	109.388	0.081933	0.025688
	117.797	0.083322	0.026359
	126.205	0.086072	0.026843
	134.613	0.087091	0.027232
	143.022	0.089771	0.029122
	151.43	0.091684	0.02782
	159.839	0.091985	0.030228
	168.247	0.094004	0.02921
	176.656	0.095026	0.028138
	185.064	0.095693	0.027785
	193.473	0.097439	0.028004
	201.881	0.098878	0.027081
	210.29	0.10218	0.028106
	218.698	0.099846	0.028961
	227.122	0.102209	0.028273
	235.531	0.10332	0.027986
	243.939	0.105131	0.028977
	252.363	0.104803	0.028478
	260.771	0.107014	0.02985
	269.18	0.107072	0.030578
	277.588	0.107151	0.029731
	286.012	0.110089	0.029001
	294.437	0.109023	0.031609
	302.861	0.10956	0.028924
	311.269	0.111077	0.029299
	319.677	0.111664	0.029901
	328.086	0.113865	0.029517
	336.494	0.113259	0.030571
	344.934	0.113164	0.02855
	353.342	0.115285	0.028227
	361.751	0.115957	0.028902
	370.159	0.113979	0.029092
	378.568	0.115298	0.030722
	386.976	0.115074	0.029429
	395.385	0.116343	0.031079
	403.793	0.117091	0.031255
	412.202	0.118339	0.030842
	420.61	0.118666	0.029523
			0.029467
			0.03048
			0.029021
			0.031775
			0.031033
			0.031585
			0.032375
			0.030351
			0.032192
			0.03094
			0.030617
			0.032878
			0.032243
			0.030507
			0.03175
			0.03177
			0.033166
			0.032686
			0.032801
			0.033149
			0.033326
			0.031619
			0.032409
			0.032523
			0.033469
			0.031983
			0.031764
			0.033957
			0.033515
			0.033197
			0.035035
			0.0342
			0.032334
			0.035394
			0.033453
			0.034126
			0.033387
			0.035183
			0.033547
			0.034018
			0.034316
			0.033861
			0.034109
			0.034429
			0.034832
			0.034456
			0.034894
			0.033634
			0.034655
			0.034365
			0.035808
			0.036222
			0.036
			0.034457
			0.035577
			0.035768
			0.036024
			0.035611
			0.036579
			0.035724
			0.035693
			0.035393
			0.03494
			0.035623
			0.036107
			0.036976
			0.035798
			0.035933
			0.035878
			0.035725
			0.036667
			0.037014
			0.03655
			0.035882
			0.035775
			0.036166
			0.036219
			0.037257
			0.03799
			0.037565
			0.03703
			0.036151
			0.037382
			0.036481
			0.038628
			0.039294
			0.036873
			0.037685
			0.03949
			0.037377
			0.03708
			0.038429
			0.037573
			0.035485
			0.037844
			0.03735
			0.038095
			0.037857
			0.038816
			0.038665
			0.038862
			0.035955
			0.038586
			0.036635
			0.037153
			0.038865
			0.040291
			0.037955
			0.037181
			0.03832
			0.038385
			0.037306
			0.037817
			0.039103
			0.039377
			0.038323
			0.038955
			0.037855
			0.039549
			0.040015
			0.039026
			0.040164
			0.038432
			0.040723
			0.039413
			0.039055
			0.039396
			0.037602
			0.040001
			0.039529
			0.039605
			0.041141
			0.040927
			0.040895
			0.039236
			0.040449
			0.040174
			0.03857
			0.040584
			0.040194
			0.039406
			0.039946
			0.040223
			0.041264
			0.040497
			0.042738
			0.040875
			0.040611
			0.041012
			0.04167
			0.041619
			0.040929
			0.042219
			0.040764
			0.04101
			0.039911
			0.039483
			0.041497
			0.041148
			0.042427
			0.04097
			0.040997
			0.042086
			0.040494
			0.041201
			0.040948
			0.041743
			0.041958
			0.042422
			0.042501
			0.043449
			0.041327
			0.040301
			0.043618
			0.040799
			0.04288
			0.041171
			0.04229
			0.041225
			0.041731
			0.042372
			0.041674
			0.041895
			0.041803
			0.042635
			0.043614
			0.04216
			0.041854
			0.040329
			0.04313
			0.038757
			0.045419
			0.043064
			0.042633
			0.042997
			0.043021
			0.041944
			0.042597
			0.043464
			0.042766
			0.043039
			0.042434
			0.043517
			0.043381
			0.043491
			0.042521
			0.042586
			0.042244
			0.044912
			0.043807
			0.043637
			0.045001
			0.044843
			0.043063
			0.044334
			0.041397
			0.044867
			0.043556
			0.043759
			0.04374
			0.042268
			0.044653
			0.044816
			0.043479
			0.044128
			0.044222
			0.044053
			0.045463
			0.044653
			0.044289
			0.04389
			0.043018
			0.044518
			0.044541
			0.044824
			0.044458
			0.044579
			0.045871
			0.045031
			0.043358
			0.045045
			0.044878
			0.044022
			0.043757
			0.045957
			0.04541
			0.044088
			0.044344
			0.044515
			0.045141
			0.04588
			0.044831
			0.045412
			0.044356
			0.043212
			0.045737
			0.044665
			0.04648
			0.043656
			0.044856
			0.043626
			0.045738
			0.04426
			0.045177
			0.046742
			0.045088
			0.045219
			0.046541
			0.045781
			0.046654
			0.044591
