# Supplementary material for: Allosteric coupling asymmetry mediates paradoxical activation of BRAF by type II inhibitors
Source: eLife journal article supplement (doi:10.7554/elife.95481), 2024-04-03
Supplement: fig1-figsupp2-data1 [file Figure1_figure supplement 2 - source data 1.xlsx]

## Sheet: Sheet1
a		[BRAF] (μM)
	[GDC0879] (nM)	0.04	0.09	0.25	0.62	1.82	4.56	11.1	28		*excluded from global fitting analysis
	0.01	0.145	0.1393	0.1422	0.1448	0.1549	0.175464	0.207421	0.250204
	13.1072	0.1409	0.1398	0.1454	0.1483	0.1574	0.176735	0.208905	0.249715
	32.768	0.1427	0.1466	0.1402*	0.1536	0.1583	0.178006	0.209091	0.251426
	81.92	0.1556	0.1643	0.1682	0.1637	0.1661	0.179863	0.211503	0.250611
	204.8	0.1839	0.2117	0.2194	0.196	0.1817	0.18739	0.213915	0.25216
	512	0.2203	0.2575	0.2873	0.1469*	0.2176	0.204106	0.220501	0.253871
	1280	0.246	0.2826	0.1416*	0.1459*	0.3033	0.240469	0.234694	0.259658
	3200	0.256	0.2953	0.142*	0.3632	0.1567*	0.331867	0.269017	0.270497
	8000	0.2651	0.301	0.1433*	0.3745	0.1567*	0.412219	0.360575	0.305379
	20000	0.2682	0.3016	0.3428	0.1463*	0.3997	0.413783	0.421985	0.380359
	50000	0.2685	0.3026	0.345	0.1466*	0.4024	0.415445	0.425046	0.430481
	200000	0.2696	0.3056	0.3475	0.3779	0.4008	0.419941	0.429685	0.433333
b
	KDdimer (μM)			KDdrug (nM)			1/2α KDdrug (nM)			1/2α KDdimer (nM)			1/αβ KDdimer (nM)			2/β KDdrug (nM)
	53.056	0.59658		234.02	0.67472		2.9248	0.5111		734.22	0.50701		41.631	0.59486		0.72949	0.50302
	54.929	0.7291		245.61	0.76872		3.0969	0.5081		917.77	0.59515		46.132	0.70565		0.91186	0.51853
	56.177	0.80725		253.33	0.82644		3.4409	0.56199		1147.2	0.64661		49.132	0.7782		1.1398	0.50031
	57.425	0.86195		261.06	0.88454		4.3012	0.57412		1434	0.85557		52.039	0.84555		1.4248	0.53184
	58.674	0.92498		268.78	0.9318		5.3765	0.77052		1792.5	0.96211		55.133	0.90684		1.781	0.57175
	59.922	0.9659		276.51	0.96878		6.7206	0.79563		2240.7	1		58.133	0.9539		2.2262	0.62344
	61.171	0.98054		284.23	0.99098		8.4007	0.9704		2800.8	0.96737		61.133	0.985		2.7828	0.68074
	62.419	1		292.53	1		10.501	1		3501	0.89216		65.049	1		3.4785	0.75036
	63.667	0.97991		299.68	0.99384		13.126	0.91181		4376.3	0.78902		67.134	0.99651		4.3481	0.80534
	64.916	0.97245		307.41	0.97073		16.408	0.90731		5470.4	0.73123		70.135	0.97918		5.4351	0.90389
	66.164	0.92878		315.13	0.94569		20.51	0.80857		6838	0.66339		73.135	0.94994		6.1051	0.9316
	67.413	0.86185		322.86	0.90597		25.637	0.75662		7777.7	0.62757		76.135	0.91201		6.7939	0.91809
	68.661	0.78336		330.58	0.85749		32.046	0.68659		8547.4	0.6036		79.136	0.8685		8.4924	1
	69.909	0.81452		338.3	0.80422		36.102	0.65104		9945	0.59255		81.311	0.83501		9.6888	0.99011
	71.158	0.75717		346.03	0.76693		40.058	0.62285		10684	0.55489		85.136	0.77482		10.615	0.9702
	72.406	0.69391		353.75	0.71799		46.311	0.61345		12112	0.53216		88.137	0.72792		12.078	0.90976
	73.654	0.62937		361.48	0.67171		50.072	0.57884		13355	0.5165		91.137	0.68125		13.269	0.88399
	74.903	0.64577		365.66	0.64686		56.519	0.5813		14279	0.54425		94.138	0.64106		14.467	0.82875
	76.151	0.60413		376.93	0.58392		62.59	0.56735		15363	0.53677		97.138	0.60092		15.662	0.79294
	78.024	0.56332		388.51	0.52384		66.728	0.55935		16694	0.52886		101.64	0.5472		16.587	0.77687
							71.832	0.5507		17530	0.52768					18.051	0.71499
							78.238	0.54117		18614	0.52066					19.245	0.66266
							82.04	0.53765		19698	0.51516					20.733	0.59606
							87.145	0.53019		20868	0.51085					21.634	0.55871
							92.249	0.52481		22407	0.50587					23.325	0.60867
							97.798	0.5198								24.621	0.58441
							105.01	0.51362
c
	c1			c2			Bconc1 (nM)			Bconc2 (nM)			Bconc3 (nM)			Bconc4 (nM)			Bconc5 (nM)			Bconc6 (nM)			Bconc7 (nM)			Bconc8 (nM)
	0.13573	0.71448		0.42869	0.69286		28.609	0.52843		60.687	0.51619		150.33	0.54555		445.58	0.54382		1679.8	0.53062		4351	0.62392		10251	0.64597		24535	0.64953
	0.13632	0.78246		0.4296	0.7661		31.44	0.63794		66.692	0.62869		158.24	0.59515		471.79	0.62258		1729.8	0.62999		4432.6	0.71429		10550	0.78757		25123	0.76828
	0.13671	0.82644		0.43021	0.81462		33.327	0.71249		70.696	0.70254		168.03	0.65786		488.95	0.67471		1778.6	0.71537		4486.9	0.77387		10750	0.87174		25515	0.83665
	0.13711	0.8677		0.43082	0.85757		35.761	0.80713		75.859	0.8		179.83	0.7348		524.21	0.78358		1796.5	0.75467		4541.3	0.83163		10949	0.9315		25907	0.90235
	0.1375	0.90446		0.43143	0.90727		38.989	0.91685		78.702	0.84989		191.63	0.80857		546.77	0.84646		1829.9	0.83997		4595.7	0.88442		11148	0.98173		26298	0.95057
	0.13789	0.93514		0.43204	0.94022		40.876	0.95943		82.706	0.91163		197.8	0.84487		575.69	0.91646		1863.2	0.89982		4650.1	0.92964		11390	1		26690	0.97699
	0.13828	0.97139		0.43265	0.96941		42.763	0.98966		86.709	0.95928		215.23	0.89099		604.6	0.96543		1896.5	0.94586		4704.5	0.9649		11547	0.98858		27261	1
	0.13867	0.99		0.43326	0.98922		44.701	1		90.712	0.98951		227.03	0.96903		633.51	0.99201		1929.9	0.97445		4758.9	0.98841		11746	0.96985		27474	0.99836
	0.13922	1		0.43411	1		46.538	0.99238		94.824	1		238.83	0.99505		655.26	1		1976.2	1		4834.4	1		11946	0.92575		27866	0.98019
	0.13945	0.998		0.43449	0.99749		48.425	0.94119		98.719	0.99313		247.26	1		691.34	0.98221		1996.6	0.99684		4867.7	0.99743		12145	0.86377		28258	0.96312
	0.13985	0.98611		0.4351	0.98625		50.312	0.93445		102.72	0.96807		262.43	0.96865		720.25	0.95808		2029.9	0.97809		4922	0.98419		12344	0.79336		28650	0.92854
	0.14024	0.96422		0.43571	0.96053		52.199	0.88958		106.73	0.93085		274.23	0.96123		749.17	0.91749		2063.3	0.94407		4976.4	0.96051		12544	0.79693		29042	0.8996
	0.14063	0.93351		0.43632	0.93465		54.087	0.8415		110.73	0.86563		286.03	0.92514		778.08	0.87493		2096.6	0.89988		5030.8	0.92888		12743	0.74759		29433	0.85911
	0.14141	0.85888		0.43693	0.89738		55.877	0.79346		118.53	0.78766		297.84	0.87371		819.07	0.80785		2130	0.84937		5085.2	0.92296		12942	0.69449		29825	0.81177
	0.1418	0.81352		0.43754	0.85567		57.861	0.73899		122.74	0.7325		309.07	0.83311		835.91	0.78012		2163.3	0.79597		5139.6	0.89169		13142	0.64101		30217	0.76089
	0.1422	0.76598		0.43815	0.81028		59.748	0.67829		126.74	0.68286		321.44	0.78068		864.82	0.73268		2196.7	0.7801		5194	0.85665		13341	0.58938		30669	0.75101
	0.14259	0.71764		0.43876	0.76169		61.636	0.64529		130.75	0.63776		333.24	0.72772		893.73	0.69048		2223.2	0.70101		5248.4	0.81713		13540	0.54109		31001	0.72083
	0.14298	0.67037		0.43937	0.71571		62.861	0.61675		133.35	0.60926		345.04	0.67284		922.65	0.6435		2263.4	0.64105		5302.7	0.77906		13740	0.49706		31393	0.68296
	0.14357	0.60471		0.43998	0.6692		66.354	0.54223		140.75	0.53395		356.84	0.63584		951.56	0.60335		2296.7	0.59535		5357.1	0.74342		13939	0.45646		31785	0.64413
				0.4409	0.60746								368.64	0.59037		980.47	0.57409		2346.8	0.53364		5438.7	0.62342		14238	0.53253		32373	0.58673
													386.34	0.53714		1023.8	0.53161
