# Supplementary material for: Allosteric coupling asymmetry mediates paradoxical activation of BRAF by type II inhibitors
Source: eLife journal article supplement (doi:10.7554/elife.95481), 2024-04-03
Supplement: fig1-figsupp3-data1 [file Figure1_figure supplement 3 - source data 1.xlsx]

## Sheet: Sheet1
		[BRAF] (nM)														[BRAF] (nM)
	[GDC0879] (nM)	14.8		37.1		92.8		232		580		1450			[AZ628] (nM)	14.8		37.1		92.8		232		580		1450
	0.01	0.1704	0.1705	0.1627	0.1646	0.1613	0.1625	0.1661	0.1653	0.1692	0.1691	0.1755	0.1767		0.01	0.1703	0.1697	0.1628	0.1648	0.1631	0.1609	0.1653	0.1643	0.1661	0.1674	0.1739	0.1734
	13.1072	0.1688	0.1711	0.164	0.1639	0.1649	0.165	0.1691	0.1698	0.1738	0.1744	0.1791	0.1786		13.1072	0.2319	0.2348	0.2274	0.2353	0.2053	0.2066	0.1858	0.1859	0.1761	0.1784	0.1772	0.1771
	32.768	0.1723	0.1714	0.1697	0.1675	0.1711	0.1726	0.1782	0.1788	0.1815	0.1799	0.1824	0.1834		32.768	0.3128	0.3136	0.3183	0.3003	0.2598	0.2607	0.2139	0.2148	0.1901	0.1883	0.1839	0.1825
	81.92	0.1765	0.1774	0.1803	0.1883	0.1955	0.1957	0.2022	0.2057	0.1998	0.1985	0.194	0.195		81.92	0.4021	0.3927	0.4207	0.4272	0.3671	0.3653	0.2697	0.2843	0.2114	0.215	0.1964	0.1942
	204.8	0.195	0.1948	0.2093	0.211	0.2451	0.2439	0.2612	0.2628	0.249	0.253	0.2203	0.2222		204.8	0.4651	0.4538	0.4775	0.4826	0.4679	0.4719	0.4177	0.4447	0.2859	0.2813	0.2225	0.2232
	512	0.2201	0.2201	0.2492	0.2512	0.2996	0.299	0.3392	0.3383	0.3537	0.3524	0.2685	0.2855		512	0.4837	0.4805	0.4981	0.4978	0.5056	0.5032	0.5119	0.5105	0.4491	0.4622	0.2895	0.291
	1280	0.244	0.2419	0.2769	0.2788	0.3329	0.3347	0.3804	0.3803	0.4165	0.4171	0.4148	0.419		1280	0.4921	0.4926	0.5058	0.5041	0.5104	0.5088	0.5213	0.5203	0.5222	0.5212	0.4755	0.4998
	3200	0.256	0.2566	0.2921	0.293	0.35	0.3489	0.3968	0.3958	0.4339	0.4343	0.4622	0.4636		3200	0.4996	0.4963	0.5065	0.5098	0.515	0.5147	0.5248	0.5251	0.5253	0.5284	0.5362	0.5381
	8000	0.2631	0.2668	0.3009	0.302	0.3551	0.355	0.402	0.4008	0.4397	0.4392	0.4709	0.4684		8000	0.5031	0.5008	0.5095	0.5088	0.5175	0.5149	0.527	0.5264	0.5317	0.5294	0.5396	0.5396
	20000	0.2658	0.2649	0.3042	0.3061	0.3577	0.3572	0.4058	0.4046	0.4414	0.4402	0.4733	0.4722		20000	0.5053	0.5033	0.5146	0.5133	0.5227	0.52	0.5309	0.5319	0.5349	0.5255	0.5445	0.5429
	50000	0.2689	0.2661	0.3097	0.3078	0.3595	0.3608	0.405	0.406	0.4431	0.4404	0.4748	0.4736		50000	0.5096	0.5087	0.5181	0.5155	0.524	0.5224	0.5328	0.534	0.5391	0.5368	0.5514	0.5486
	200000	0.2765	0.2776	0.3103	0.3109	0.3593	0.3609	0.4074	0.4095	0.4442	0.4427	0.477	0.4755		200000	0.514	0.5143	0.5193	0.5186	0.5246	0.5267	0.5378	0.5376	0.5396	0.5364	0.5523	0.5516
		[BRAF] (nM)														[BRAF] (nM)
	[sorafenib] (nM)	14.8		37.1		92.8		232		580		1450			[LY3009120] (nM)	14.8		37.1		92.8		232		580		1450
	0.01	0.1779	0.1703	0.1666	0.1637	0.1624	0.1619	0.1645	0.1658	0.1691	0.1693	0.1778	0.1769		0.01	0.1712	0.1697	0.1634	0.1633	0.1613	0.1629	0.165	0.1654	0.165	0.1649	0.1731	0.1738
	13.1072	0.1693	0.1695	0.164	0.164	0.1625	0.164	0.1675	0.1694	0.1747	0.1756	0.1817	0.183		13.1072	0.2983	0.3021	0.279	0.2925	0.2228	0.2184	0.1927	0.1963	0.1789	0.1809	0.1786	0.1773
	32.768	0.1693	0.1705	0.1668	0.1823	0.1674	0.1693	0.1821	0.177	0.1856	0.1884	0.1891	0.1888		32.768	0.4023	0.3978	0.3947	0.3977	0.3023	0.3194	0.2323	0.2337	0.1961	0.194	0.1873	0.1871
	81.92	0.1723	0.1726	0.1701	0.1715	0.1808	0.1855	0.1992	0.1956	0.2062	0.2123	0.2055	0.2059		81.92	0.4604	0.4587	0.4801	0.4733	0.4413	0.4296	0.3266	0.3263	0.232	0.2396	0.2066	0.2041
	204.8	0.1777	0.1818	0.1872	0.1928	0.2158	0.2182	0.2497	0.249	0.2627	0.2608	0.2391	0.2437		204.8	0.4815	0.4784	0.4949	0.4854	0.4981	0.4976	0.4919	0.4943	0.3329	0.3551	0.2496	0.2485
	512	0.2062	0.207	0.2384	0.236	0.2989	0.2935	0.3297	0.3217	0.3617	0.3572	0.322	0.3333		512	0.4898	0.4867	0.498	0.5001	0.5061	0.5062	0.5189	0.5166	0.5105	0.5024	0.3443	0.3571
	1280	0.2738	0.2788	0.324	0.3033	0.3744	0.3864	0.4322	0.4137	0.4466	0.456	0.4539	0.4516		1280	0.4896	0.4847	0.5018	0.5009	0.5101	0.508	0.518	0.5199	0.5174	0.5164	0.5288	0.5246
	3200	0.3626	0.3658	0.393	0.3736	0.4503	0.4359	0.4729	0.4573	0.4926	0.4971	0.5082	0.5073		3200	0.482	0.4758	0.4987	0.4962	0.5069	0.5081	0.5206	0.5211	0.5181	0.5177	0.5301	0.5273
	8000	0.431	0.4227	0.4515	0.4539	0.4752	0.4706	0.4901	0.4879	0.5079	0.5057	0.5196	0.5177		8000	0.4705	0.4626	0.4933	0.491	0.508	0.5075	0.5215	0.5232	0.5212	0.5207	0.5336	0.5324
	20000	0.4589	0.4597	0.4806	0.4743	0.4852	0.4894	0.5028	0.5028	0.512	0.5109	0.5232	0.5223		20000	0.4403	0.4442	0.48	0.4804	0.5045	0.5031	0.5204	0.5179	0.5234	0.5229	0.5358	0.5335
	50000	0.4696	0.4737	0.4861	0.4868	0.495	0.4948	0.5061	0.5064	0.514	0.5154	0.5228	0.5236		50000	0.4222	0.4227	0.4668	0.4676	0.5003	0.4984	0.5214	0.5168	0.5267	0.5221	0.5385	0.5359
	200000	0.4766	0.4778	0.4912	0.4911	0.4976	0.4967	0.5072	0.5074	0.5166	0.5145	0.5267	0.523		200000	0.3894	0.3913	0.4184	0.416	0.4737	0.4762	0.5085	0.5091	0.5228	0.5241	0.5389	0.5381
		[BRAF] (nM)														[BRAF] (nM)
	[TAK632] (nM)	14.8		37.1		92.8		232		580		1450			[ponatinib] (nM)	1544		618		247		99		39.5		15.8
	0.01	0.17	0.1713	0.1629	0.1624	0.162	0.1626	0.1656	0.1657	0.1704	0.1679	0.1757	0.1755		20000	0.2058	0.205	0.2027	0.2012	0.2021	0.2036	0.1963	0.1984	0.1946	0.1962	0.1913	0.192
	13.1072	0.209	0.2097	0.2062	0.2081	0.203	0.2029	0.1941	0.1944	0.1808	0.1794	0.1808	0.1821		8000	0.2046	0.2026	0.2024	0.2009	0.2005	0.2017	0.1977	0.1962	0.1933	0.1939	0.1895	0.1899
	32.768	0.2532	0.2682	0.268	0.2669	0.2535	0.255	0.2319	0.2321	0.1971	0.1981	0.1868	0.1883		3200	0.2032	0.2039	0.2005	0.2005	0.2012	0.1999	0.1958	0.1959	0.1925	0.1922	0.189	0.188
	81.92	0.3505	0.3478	0.3577	0.3768	0.3407	0.3559	0.2864	0.3041	0.2277	0.2322	0.2046	0.2037		1280	0.2018	0.2029	0.1996	0.2022	0.1995	0.201	0.1944	0.1938	0.1911	0.1925	0.1878	0.188
	204.8	0.4238	0.4259	0.4531	0.4545	0.4562	0.4436	0.4502	0.4137	0.3332	0.3212	0.246	0.2463		512	0.1475	0.1469	0.1992	0.1995	0.1992	0.1999	0.1921	0.1953	0.1905	0.191	0.1858	0.1868
	512	0.4653	0.4618	0.4814	0.4836	0.4937	0.4927	0.4944	0.4975	0.4674	0.4813	0.341	0.3221		205	0.0986	0.0992	0.1434	0.1438	0.194	0.1974	0.1931	0.1935	0.1878	0.1878	0.1837	0.1823
	1280	0.4816	0.4754	0.4903	0.4863	0.4968	0.4965	0.5079	0.5086	0.511	0.5055	0.5095	0.5149		82	0.0794	0.0804	0.0913	0.0949	0.1506	0.1458	0.1862	0.1835	0.1839	0.184	0.178	0.1728
	3200	0.4807	0.4808	0.4913	0.4917	0.4991	0.4959	0.5099	0.5073	0.5129	0.5111	0.5222	0.52		32	0.0713	0.0727	0.073	0.0731	0.096	0.0954	0.1346	0.1384	0.1614	0.1586	0.1561	0.1581
	8000	0.4848	0.4843	0.4943	0.493	0.5006	0.4997	0.5084	0.5113	0.5135	0.5112	0.522	0.5215		13	0.0682	0.0689	0.0639	0.0635	0.0722	0.0724	0.0911	0.0915	0.118	0.1213	0.123	0.118
	20000	0.4821	0.4842	0.494	0.4926	0.4995	0.4994	0.5121	0.5065	0.5132	0.5124	0.5219	0.5232		0.01	0.0649	0.0652	0.0548	0.0562	0.0515	0.0518	0.0485	0.0493	0.045	0.0453	0.0446	0.0445
	50000	0.4822	0.487	0.4942	0.497	0.5022	0.5033	0.5123	0.5119	0.5186	0.516	0.5253	0.527
	200000	0.4849	0.483	0.499	0.4975	0.5103	0.5086	0.5226	0.523	0.528	0.527	0.5339	0.5345			[BRAF] (nM)
															[tovorafenib] (nM)	1544		618		247		99		39.5		15.8
		[BRAF] (nM)													20000	0.175	0.1755	0.1729	0.1709	0.1726	0.1727	0.1673	0.1681	0.1642	0.1641	0.1614	0.161
	[L779450] (nM)	1544		618		247		99		39.5		15.8			8000	0.1736	0.1736	0.1714	0.1705	0.172	0.1716	0.1658	0.1665	0.1645	0.1629	0.1599	0.1598
	20000	0.1944	0.1942	0.1886	0.1889	0.1853	0.1845	0.1748	0.1762	0.1631	0.163	0.1507	0.1513		3200	0.172	0.173	0.1696	0.17	0.1712	0.1708	0.1659	0.1664	0.1619	0.1622	0.16	0.1591
	8000	0.1963	0.1972	0.19	0.1913	0.1865	0.1866	0.1768	0.1763	0.1635	0.1634	0.1507	0.1507		1280	0.1649	0.1653	0.1699	0.1706	0.1689	0.1699	0.165	0.1642	0.1608	0.1615	0.1581	0.1571
	3200	0.1967	0.1958	0.1917	0.1911	0.1852	0.1852	0.1757	0.1755	0.1629	0.1633	0.1472	0.1487		512	0.1163	0.1169	0.1567	0.1522	0.1678	0.1705	0.1633	0.1633	0.1595	0.1596	0.157	0.1566
	1280	0.1904	0.1911	0.1894	0.189	0.1823	0.1833	0.1717	0.1709	0.1586	0.1571	0.1414	0.1414		205	0.0894	0.0896	0.1041	0.1046	0.1516	0.1475	0.1586	0.1585	0.156	0.157	0.1526	0.1513
	512	0.1358	0.1364	0.1773	0.1769	0.1753	0.1763	0.1641	0.1641	0.1473	0.1485	0.1287	0.1298		82	0.0761	0.0762	0.0775	0.078	0.102	0.101	0.1302	0.1311	0.1422	0.1405	0.1381	0.1357
	205	0.0954	0.097	0.1198	0.1217	0.1495	0.1507	0.1426	0.1429	0.1263	0.1278	0.1055	0.1046		32	0.0699	0.0708	0.0654	0.0654	0.0746	0.0768	0.0958	0.095	0.1156	0.1133	0.1142	0.1101
	82	0.0788	0.0797	0.0843	0.0845	0.1029	0.1043	0.1049	0.106	0.0949	0.0949	0.0753	0.0746		13	0.0679	0.0681	0.0603	0.0605	0.0624	0.0636	0.0691	0.0687	0.0844	0.0845	0.0861	0.0841
	32	0.0707	0.0716	0.0686	0.0678	0.0725	0.074	0.0734	0.0731	0.0647	0.0655	0.0541	0.0548		0.01	0.0651	0.0657	0.0564	0.0568	0.0532	0.0524	0.0481	0.0481	0.0448	0.0462	0.0447	0.0441
	13	0.0677	0.0684	0.0603	0.0607	0.0603	0.0613	0.0576	0.0583	0.0509	0.052	0.0479	0.0467
	0.01	0.0655	0.0661	0.0551	0.0566	0.053	0.0527	0.0485	0.0482	0.0453	0.0447	0.0449	0.0445			[BRAF] (nM)
															[SB590885] (nM)	1544		618		247		99		39.5		15.8
		[BRAF] (nM)													3200	0.1948	0.1946	0.1839	0.1835	0.1748	0.1755	0.1587	0.1582	0.1379	0.1377	0.1177	0.1174
	[belvarafenib] (nM)	1544		618		247		99		39.5		15.8			1280	0.1947	0.1937	0.1846	0.1856	0.1746	0.1757	0.1581	0.1586	0.1373	0.1381	0.1153	0.1152
	20000	0.2001	0.2003	0.1973	0.1981	0.1972	0.1975	0.1941	0.1919	0.1911	0.1915	0.1922	0.188		512	0.15	0.1509	0.1836	0.1834	0.1755	0.1754	0.1574	0.1578	0.1367	0.1367	0.1139	0.1148
	8000	0.1999	0.2006	0.1968	0.1971	0.198	0.1978	0.1926	0.193	0.1884	0.1885	0.1863	0.1871		205	0.1011	0.1014	0.1344	0.1336	0.17	0.1701	0.1553	0.1549	0.1328	0.1337	0.111	0.1113
	3200	0.2005	0.2	0.1965	0.1971	0.1967	0.1974	0.1924	0.1927	0.1882	0.1887	0.1855	0.1859		82	0.0806	0.0818	0.0893	0.089	0.1237	0.1231	0.1427	0.1409	0.1263	0.1268	0.1044	0.1057
	1280	0.1991	0.2009	0.1969	0.1987	0.1958	0.1975	0.191	0.1916	0.1874	0.1867	0.1832	0.184		32	0.0712	0.0716	0.0702	0.0704	0.0816	0.0817	0.0966	0.0993	0.107	0.1074	0.0912	0.0907
	512	0.1427	0.1446	0.1973	0.1961	0.1958	0.1963	0.1914	0.1911	0.1858	0.187	0.1831	0.1823		13	0.0679	0.0679	0.0615	0.0616	0.065	0.0646	0.0669	0.0677	0.0734	0.074	0.0697	0.0685
	205	0.0983	0.0991	0.1432	0.1414	0.1929	0.196	0.1891	0.1916	0.1841	0.1852	0.1815	0.1813		0.01	0.0647	0.0657	0.0558	0.0561	0.0532	0.053	0.0488	0.0488	0.0451	0.0455	0.0445	0.0449
	82	0.0797	0.0803	0.0937	0.093	0.1362	0.1477	0.1857	0.1838	0.1815	0.1841	0.177	0.1767
	32	0.0724	0.0717	0.0737	0.0722	0.0937	0.0961	0.1383	0.1408	0.1709	0.1713	0.1689	0.1667
	13	0.0683	0.0686	0.0631	0.0632	0.0718	0.0728	0.0878	0.088	0.1342	0.1347	0.1443	0.1436
	0.01	0.0655	0.0669	0.0561	0.0563	0.0528	0.0527	0.0494	0.0501	0.0448	0.045	0.0446	0.0449
		[BRAF] (nM)
	[ZM336372] (nM)	1544		618		247		99		39.5		15.8
	20000	0.1997	0.2009	0.196	0.196	0.1957	0.1963	0.1884	0.1887	0.1806	0.1816	0.1685	0.1688
	8000	0.1996	0.1993	0.1943	0.1948	0.1923	0.1942	0.183	0.1837	0.1704	0.1707	0.1508	0.1515
	3200	0.196	0.1964	0.1906	0.1916	0.1863	0.1867	0.172	0.1725	0.1515	0.1543	0.1221	0.1228
	1280	0.1823	0.1802	0.18	0.1799	0.1717	0.1757	0.1544	0.1534	0.1246	0.1258	0.0944	0.0944
	512	0.1315	0.1316	0.1532	0.1518	0.1504	0.151	0.1258	0.1246	0.0967	0.0973	0.0707	0.0714
	205	0.0938	0.0945	0.1076	0.1054	0.1118	0.1137	0.0908	0.0904	0.0684	0.0691	0.0559	0.0558
	82	0.0779	0.0778	0.0794	0.0784	0.0794	0.0814	0.0669	0.066	0.0552	0.0571	0.0491	0.0483
	32	0.0706	0.0708	0.065	0.0655	0.0627	0.0648	0.0551	0.0558	0.0477	0.0484	0.0452	0.0451
	13	0.067	0.0679	0.0598	0.0596	0.0573	0.0574	0.0514	0.0515	0.0459	0.0466	0.0457	0.0452
	0.01	0.0647	0.0656	0.0565	0.0557	0.0522	0.0527	0.0486	0.0496	0.0452	0.0455	0.0436	0.0455
