# Supplementary material for: Allosteric coupling asymmetry mediates paradoxical activation of BRAF by type II inhibitors
Source: eLife journal article supplement (doi:10.7554/elife.95481), 2024-04-03
Supplement: fig1-figsupp4-data1 [file Figure1_figure supplement 4 - source data 1.xlsx]

## Sheet: Sheet1
a
	KDdimer (μM)	minChi2/Chi2		KDdrug (nM)	minChi2/Chi2		1/2α KDdrug (nM)	minChi2/Chi2		1/2α KDdimer (nM)		minChi2/Chi2		1/αβ KDdimer (nM)			2/β KDdrug (nM)
	2.21	0.52465		9.4083	0.50707		0.002268	0.51013		0.35688		0.53738		0.009932	0.73421		0.072679	0.50195
	2.46	0.60042		11.76	0.56651		0.002402	0.5215		0.4461		0.59763		0.010517	0.74676		0.080755	0.51111
	3.07	0.77906		14.701	0.63818		0.002668	0.54224		0.55762		0.66669		0.011685	0.77041		0.10094	0.53328
	3.84	0.93646		18.376	0.72158		0.003335	0.58427		0.69703		0.74108		0.014607	0.82201		0.12618	0.56106
	4.8	1		22.97	0.8127		0.004169	0.63265		0.87128		0.81719		0.018258	0.87386		0.15772	0.59553
	5.42	0.98485		28.712	0.90153		0.005212	0.69011		1.0891		0.88984		0.022823	0.92261		0.19716	0.63759
	6	0.95041		35.89	0.97027		0.006515	0.75569		1.3614		0.95034		0.028528	0.96371		0.24644	0.6877
	6.85	0.88719		44.862	1		0.008143	0.82565		1.7017		0.98941		0.03566	0.99149		0.30806	0.74547
	7.5	0.83834		56.078	0.97794		0.010179	0.89345		2.1272		1		0.044576	1		0.38507	0.8091
	8.28	0.78481		70.097	0.91111		0.012724	0.95081		2.6589		0.96743		0.055719	0.98449		0.48134	0.87462
	8.99	0.74151		87.622	0.82076		0.015905	0.98866		3.3237		0.93693		0.06273	0.96729		0.60167	0.93508
	9.38	0.72034		96.128	0.7816		0.019881	1		4.1546		0.86066		0.069649	0.94226		0.75209	0.98036
	10.4	0.6705		109.53	0.72812		0.024851	0.98382		5.1933		0.81338		0.08193	0.90025		0.94011	1
	11.1	0.6419		119.25	0.69516		0.031064	0.94535		6.4916		0.73534		0.087062	0.87488		1.1751	0.98825
	11.7	0.62052		130.82	0.66151		0.038829	0.89309		7.1542		0.69715		0.10113	0.82579		1.4689	0.94832
	12.6	0.5951		136.91	0.64604		0.048537	0.83524		8.1145		0.69149		0.10883	0.7878		1.8362	0.89001
	13.3	0.57575		153.94	0.6091		0.060671	0.77755		9.2456		0.6566		0.12033	0.74431		2.2952	0.82387
	14	0.55922		171.14	0.57967		0.066143	0.75606		10.143		0.63073		0.12993	0.72144		2.869	0.75903
	14.6	0.54515		177.07	0.57084		0.075839	0.72342		11.337		0.59915		0.13603	0.68919		3.1044	0.7373
	15.4	0.53071		188.63	0.55556		0.085797	0.69575		12.679		0.59689		0.14913	0.64736		3.5862	0.70102
	16.5	0.5129		200.19	0.54279		0.094798	0.67459		13.429		0.58645		0.15873	0.61897		4.0373	0.67302
				213.92	0.5288		0.10545	0.65339		14.474		0.57257		0.17004	0.58789		4.4828	0.65315
				223.32	0.5202		0.1185	0.63175		15.849		0.55575		0.17793	0.56768		4.9701	0.63435
				240.66	0.5062		0.1251	0.62226		16.566		0.54763		0.1913	0.53595		5.6035	0.61505
							0.13493	0.60961		17.612		0.53662		0.20193	0.51279		5.9029	0.60748
							0.14812	0.59495		18.657		0.52661					6.3694	0.59729
							0.15459	0.58831		19.811		0.5323					7.0044	0.58591
							0.16441	0.57973		21.272		0.52399					7.3022	0.58139
							0.17424	0.57141									7.7686	0.57514
							0.18515	0.56386									8.2351	0.56976
							0.19881	0.55462									8.7555	0.5646
																	9.4011	0.5592
b
	KDdimer (μM)	minChi2/Chi2		KDdrug (nM)	minChi2/Chi2		1/2α KDdrug (nM)	minChi2/Chi2		1/2α KDdimer (nM)		minChi2/Chi2		1/αβ KDdimer (nM)	minChi2/Chi2		2/β KDdrug (nM)	minChi2/Chi2
	0.81868	0.52946		0.018489	0.80817		0.013399	0.80827		474.61		0.56056		5751.5	0.50615		0.19916	0.80814
	0.85322	0.62766		0.022889	0.80855		0.016587	0.80862		521.58		0.67696		6162.7	0.62206		0.24655	0.80851
	0.87624	0.69739		0.028611	0.80882		0.020733	0.80895		552.88		0.75343		6390.6	0.69073		0.30819	0.80877
	0.89927	0.76798		0.035764	0.80927		0.025917	0.80944		593.27		0.84375		6710.9	0.78644		0.38524	0.80921
	0.92229	0.83597		0.044705	0.80982		0.032396	0.81001		615.5		0.88688		6984.9	0.86181		0.48155	0.80975
	0.94532	0.89714		0.055881	0.8105		0.040495	0.81073		646.81		0.93694		7259	0.92494		0.60194	0.81041
	0.96834	0.94704		0.069851	0.81134		0.050618	0.81162		678.12		0.97274		7533.1	0.9706		0.75242	0.81126
	0.99137	0.98171		0.087314	0.81238		0.063273	0.81271		709.43		0.99377		7807.2	0.99545		0.94053	0.81223
	1.0233	1		0.10914	0.81362		0.079091	0.81404		741.58		1		7988.2	1		1.1757	0.81345
	1.0374	0.99672		0.13643	0.81514		0.098864	0.81564		772.04		0.99381		8355.4	0.98263		1.4696	0.81493
	1.0604	0.97759		0.17053	0.81697		0.12358	0.81761		803.35		0.97707		8629.5	0.95065		1.837	0.81672
	1.0835	0.94399		0.21317	0.8192		0.15447	0.81991		834.66		0.95344		8903.6	0.90745		2.2962	0.8189
	1.1065	0.89966		0.26646	0.82181		0.19309	0.82269		865.97		0.92305		9177.7	0.85753		2.8703	0.82145
	1.1295	0.84974		0.33307	0.82494		0.24137	0.82599		897.28		0.88984		9451.8	0.80493		3.5878	0.82451
	1.1525	0.7938		0.41634	0.82865		0.30171	0.82989		926.98		0.85674		9725.9	0.75132		4.4848	0.82813
	1.1756	0.73825		0.52043	0.83299		0.37714	0.83445		959.9		0.82019		9985.3	0.70244		5.606	0.83239
	1.1986	0.68452		0.65054	0.83808		0.47142	0.83978		991.21		0.78473		10274	0.65103		7.0075	0.83736
	1.2216	0.6331		0.81317	0.84399		0.58927	0.84596		1022.5		0.75099		10548	0.60564		8.7594	0.84314
	1.2446	0.58506		1.0165	0.85078		0.73659	0.85307		1042.8		0.72986		10822	0.56372		10.949	0.84988
	1.2792	0.52116		1.2706	0.85859		0.92074	0.86121		1100.8		0.67371		11233	0.50778		13.687	0.85815
				1.5882	0.8675		1.1509	0.87046									17.108	0.86623
				1.9853	0.87758		1.4387	0.88088									21.385	0.87616
				2.4816	0.88889		1.7983	0.8925									26.731	0.88731
				3.102	0.90142		2.2479	0.9053									33.414	0.89971
				3.8775	0.91512		2.8099	0.91914									41.768	0.91332
				4.8469	0.92982		3.5124	0.9338									52.21	0.92796
				6.0586	0.9451		4.3904	0.94886									65.262	0.94334
				7.5732	0.96047		5.488	0.9637									81.578	0.95891
				9.4666	0.97503		6.8601	0.97747									101.97	0.97382
				11.833	0.9876		8.5751	0.98903									127.47	0.98684
				14.791	0.99655		10.719	0.99704									159.33	0.99627
				18.489	1		13.399	1									199.16	1
				23.112	0.99585		16.748	0.99644									248.96	0.99554
				28.89	0.98203		20.935	0.98505									311.2	0.9803
				36.112	0.95702		26.169	0.96523									388.99	0.9521
				45.14	0.9202		32.711	0.93622									486.24	0.90976
				50.859	0.89604		36.856	0.91738									542.68	0.88372
				56.425	0.87221		40.889	0.89921									607.8	0.85354
				70.531	0.81496		51.111	0.85533									709.6	0.80744
				78.59	0.78488		56.952	0.83212									759.75	0.78566
				88.164	0.75142		63.889	0.80641									876.52	0.7376
				97.078	0.72307		70.349	0.78427									949.69	0.70966
				110.21	0.68502		79.862	0.75454									1043.4	0.67629
				115.57	0.67083		83.746	0.74332									1126.9	0.64875
				124.81	0.64797		90.445	0.7251									1187.1	0.63014
				137.76	0.619		99.827	0.70178									1293.8	0.59947
				143.3	0.60759		103.84	0.69245									1377.3	0.57781
				152.54	0.58972		110.54	0.6778									1483.9	0.55143
				161.78	0.57319		117.24	0.66417									1544.2	0.53777
				172.2	0.55599		124.78	0.64976									1669.4	0.51146
				184.89	0.53684		133.99	0.63359
