# Supplementary material for: Allosteric coupling asymmetry mediates paradoxical activation of BRAF by type II inhibitors
Source: eLife journal article supplement (doi:10.7554/elife.95481), 2024-04-03
Supplement: fig1-figsupp5-data1 [file Figure1_figure supplement 5 - source data 1.xlsx]

## Sheet: Sheet1
	all values are represented in nM
							Sorafenib					TAK632					AZ628					LY3009120
						Kdimer	62400	62400	62400		Kdimer	62400	62400	62400		Kdimer	62400	62400	62400		Kdimer	62400	62400	62400
						1/2αKdimer	3.67	15	40		1/2αKdimer	16.5	85.6	119		1/2αKdimer	4.51	1.94	2.08		1/2αKdimer	0.452	2.87	2.29
						1/αβ Kdimer	0.0389	0.311	0.379		1/αβ Kdimer	0.328	1.05	0.712		1/αβ Kdimer	0.582	2.11	2.15		1/αβ Kdimer	0.928	1.89	3.48
						Kdrug	4090	11100	9540		Kdrug	375	254	37.4		Kdrug	249	892	102		Kdrug	399	61.5	25.7
						1/2αKdrug	0.241	2.67	6.11		1/2αKdrug	0.0994	0.348	0.0712		1/2αKdrug	0.018	0.0277	0.00341		1/2αKdrug	0.00289	0.00283	0.000946
						2/βKdrug	43.3	230	90.4		2/βKdrug	7.46	3.12	0.224		2/βKdrug	32.2	973	106		2/βKdrug	819	40.6	39.1
		ponatinib										tovorafenib					belvarafenib
	Kdimer	18200	17700	21400							Kdimer	14400	15900	16700		Kdimer	18500	19000	19900
	1/2αKdimer	1.5	3.27	0.528							1/2αKdimer	9.88	8.03	5.14		1/2αKdimer	0.947	0.776	0.496
	1/αβ Kdimer	0.679	0.695	0.769							1/αβ Kdimer	0.858	1.45	1.02		1/αβ Kdimer	0.434	0.713	0.569
	Kdrug	81.9	87.4	311							Kdrug	112	146	140		Kdrug	48.7	96.8	101
	1/2αKdrug	0.00674	0.0162	0.00769							1/2αKdrug	0.0769	0.0741	0.0429		1/2αKdrug	0.00249	0.00396	0.00252
	2/βKdrug	37.1	18.6	454							2/βKdrug	9.75	26.5	27.7		2/βKdrug	22.3	89	116
		ZM336372
	Kdimer	17800	19400	20000
	1/2αKdimer	7.44	10.4	6.97
	1/αβ Kdimer	0.676	1.04	0.669
	Kdrug	8900	8730	8330
	1/2αKdrug	3.73	4.68	2.91
	2/βKdrug	810	874	799
