# Supplementary material for: Allosteric coupling asymmetry mediates paradoxical activation of BRAF by type II inhibitors
Source: eLife journal article supplement (doi:10.7554/elife.95481), 2024-04-03
Supplement: fig1-figsupp6-data1 [file Figure1_figure supplement 6 - source data 1.xlsx]

## Sheet: Sheet1
	all values are represented in nM
		GDC0879
	Kdimer	62400	62400	62400
	1/2αKdimer	337	1990	1110
	1/αβ Kdimer	20.8	59.6	35.3
	Kdrug	387	312	293
	1/2αKdrug	2.09	9.93	5.21
	2/βKdrug	23.8	9.34	9.35
							L779450															SB590885
						Kdimer	11200	13100	13200												Kdimer	9550	12100	11700
						1/2αKdimer	109	85.5	86.1												1/2αKdimer	169	194	197
						1/αβ Kdimer	3.31	2.82	2.85												1/αβ Kdimer	14.2	14.6	13.5
						Kdrug	281	318	312												Kdrug	11.7	16.6	16.4
						1/2αKdrug	2.73	2.07	2.03												1/2αKdrug	0.207	0.267	0.276
						2/βKdrug	8.57	10.5	10.3												2/βKdrug	0.977	1.25	1.12
							encorafenib					dabrafenib					vemurafenib
						Kdimer	1670	2970	3270		Kdimer	1590	2930	2800		Kdimer	1770	2140	2240
						1/2αKdimer	3110	4330	11100		1/2αKdimer	1790	2230	2700		1/2αKdimer	27300	5620	13300
						1/αβ Kdimer	69000	84700	88900		1/αβ Kdimer	14900	18400	20100		1/αβ Kdimer	122000	79100	60100
						Kdrug	5.75	16.7	1.44		Kdrug	5.38	18.9	23.2		Kdrug	115	60.2	151
						1/2αKdrug	10.7	24.3	4.89		1/2αKdrug	6.04	14.4	22.3		1/2αKdrug	1770	158	897
						2/βKdrug	127	326	11.6		2/βKdrug	44.6	156	172		2/βKdrug	512	848	687
