# Supplementary material for: Allosteric coupling asymmetry mediates paradoxical activation of BRAF by type II inhibitors
Source: eLife journal article supplement (doi:10.7554/elife.95481), 2024-04-03
Supplement: fig1-figsupp7-data1 [file Figure1_figure supplement 7 - source data 1.xlsx]

## Sheet: Sheet1
c		FRET
	[inhibitor] (nM)	Sorafenib	GDC-0879	TAK-632	AZ-628	LY-3009120
	0	0.6326	0.6198	0.6214	0.6229	0.6215
	1.31072	0.6184	0.6197	0.6226	0.6214	0.6222
	3.2768	0.6202	0.6221	0.6225	0.6213	0.6221
	8.192	0.6205	0.6194	0.6245	0.6196	0.6273
	20.48	0.6181	0.6218	0.6248	0.6247	0.6389
	51.2	0.6172	0.6235	0.6376	0.6293	0.6577
	128	0.6182	0.6229	0.655	0.6415	0.6832
	320	0.6224	0.6269	0.6777	0.6624	0.7
	800	0.6217	0.6376	0.7042	0.6842	0.7053
	2000	0.6301	0.6559	0.7259	0.7008	0.7074
	5000	0.6443	0.6732	0.7405	0.7113	0.711
	20000	0.6839	0.6889	0.7455	0.713	0.7044
d	KD drug (nM) measured by intermolecular FRET					KD drug (nM) prediction from global fit analysis
	TAK-632	371.4	954.8	782.3		375	254	37.4
	AZ-628	393.1	547.5	456.7		249	892	102
	LY-3009120	37.89	21.41	31.87		399	61.5	25.7
