# Supplementary material for: Allosteric coupling asymmetry mediates paradoxical activation of BRAF by type II inhibitors
Source: eLife journal article supplement (doi:10.7554/elife.95481), 2024-04-03
Supplement: fig1-figsupp8-data1 [file Figure1_figure supplement 8 - source data 1.xlsx]

## Sheet: Sheet1
		FRET
	[inhibitor] (nM)	Sorafenib		GDC-0879		TAK-632		AZ-628		LY-3009120
	0.01	0.0679	0.0701	0.0698	0.0697	0.0691	0.0699	0.068	0.07	0.0685	0.0694
	1.3	0.0696	0.0683	0.0683	0.07	0.0691	0.068	0.0686	0.0691	0.0684	0.0694
	3.3	0.0698	0.0694	0.0681	0.0688	0.07	0.0708	0.0684	0.0685	0.0687	0.0691
	8.2	0.0685	0.0702	0.068	0.0698	0.0685	0.0721	0.0693	0.0703	0.0698	0.0667
	20.5	0.069	0.0688	0.0688	0.0683	0.0695	0.0694	0.0683	0.0693	0.0692	0.0694
	51.2	0.0684	0.0691	0.0678	0.0696	0.0705	0.0704	0.0694	0.0703	0.0669	0.0702
	128	0.0702	0.0692	0.0691	0.0688	0.0695	0.0683	0.069	0.0708	0.0676	0.0701
	320	0.0697	0.0697	0.0682	0.0693	0.0685	0.069	0.0687	0.0697	0.0704	0.0739
	800	0.0678	0.0688	0.0713	0.0683	0.0687	0.0693	0.0681	0.0691	0.0808	0.08
	2000	0.0694	0.0693	0.0686	0.07	0.0693	0.0685	0.0691	0.0695	0.1055	0.1065
	5000	0.0704	0.0693	0.0687	0.0697	0.0694	0.0726	0.0697	0.0701	0.1563	0.1619
	20000	0.0685	0.0686	0.0694	0.0672	0.0763	0.0757	0.0788	0.0756	0.2484	0.2566
