# Supplementary material for: Allosteric coupling asymmetry mediates paradoxical activation of BRAF by type II inhibitors
Source: eLife journal article supplement (doi:10.7554/elife.95481), 2024-04-03
Supplement: fig1-figsupp9-data1 [file Figure1_figure supplement 9 - source data 1.xlsx]

## Sheet: Sheet1
		BRAFWT:BRAFA481F heterodimer (orange)															BRAFWT:BRAFWT homodimer (blue)
a
	[sorafenib] (nM)	5 nM		12.6 nM		31.6 nM		78.4 nM		196 nM		490 nM				[sorafenib] (nM)	20.1 nM		50.2 nM		125.4 nM		313.6 nM		784 nM		1960 nM
	0.01	0.1866	0.1835	0.1863	0.1846	0.187	0.1857	0.1906	0.189	0.1872	0.1876	0.1901	0.1888			0.01	0.1675	0.1644	0.1663	0.1645	0.1675	0.1656	0.1687	0.169	0.1705	0.1703	0.1899	0.1901
	13.1072	0.1808	0.1811	0.1824	0.1835	0.186	0.1849	0.1892	0.189	0.1881	0.1882	0.1897	0.1891			13.1072	0.1659	0.1645	0.1668	0.1663	0.1739	0.1732	0.178	0.1789	0.1772	0.1766	0.1928	0.1941
	32.768	0.1745	0.1744	0.1759	0.1751	0.1798	0.1788	0.1875	0.186	0.189	0.1882	0.1901	0.1899			32.768	0.1609	0.161	0.1672	0.1658	0.1849	0.1841	0.1923	0.1919	0.1862	0.1865	0.1967	0.1985
	81.92	0.1828	0.1984	0.1821	0.1825	0.1879	0.1867	0.1924	0.191	0.1917	0.1918	0.1917	0.1916			81.92	0.1843	0.1838	0.2007	0.1997	0.2302	0.231	0.2279	0.2272	0.211	0.2109	0.2085	0.2098
	204.8	0.1829	0.1833	0.1842	0.1839	0.1906	0.1888	0.1952	0.1929	0.1946	0.1948	0.1945	0.1943			204.8	0.226	0.2251	0.2656	0.2739	0.3128	0.3117	0.3131	0.3191	0.2677	0.2668	0.2356	0.2356
	512	0.1843	0.184	0.1867	0.1856	0.1903	0.1912	0.1952	0.1933	0.1963	0.1973	0.2003	0.201			512	0.3087	0.3144	0.366	0.3676	0.4105	0.418	0.4291	0.4294	0.3955	0.3885	0.2894	0.2943
	1280	0.1886	0.1861	0.1868	0.1872	0.1908	0.1902	0.193	0.1939	0.1991	0.1969	0.2039	0.2061			1280	0.3945	0.3934	0.4345	0.4351	0.47	0.4661	0.4835	0.4831	0.4945	0.4907	0.4293	0.4321
	3200	0.1899	0.1891	0.1882	0.1891	0.1952	0.1936	0.1963	0.1983	0.2104	0.2111	0.2228	0.2233			3200	0.4419	0.4422	0.4661	0.4654	0.4827	0.4824	0.4949	0.4958	0.5075	0.5069	0.5336	0.534
	8000	0.1948	0.1976	0.1979	0.1964	0.2086	0.2089	0.2197	0.2252	0.2537	0.2601	0.2702	0.2771			8000	0.4626	0.4613	0.4785	0.4767	0.49	0.491	0.4998	0.5008	0.5117	0.5104	0.5389	0.539
	20000	0.2208	0.2151	0.2282	0.2272	0.2576	0.2496	0.2859	0.2846	0.3285	0.334	0.3617	0.3669			20000	0.4696	0.4692	0.4843	0.4827	0.4956	0.4932	0.5016	0.5064	0.5144	0.5124	0.5392	0.5396
	50000	0.2438	0.2456	0.2767	0.2645	0.2975	0.3106	0.3187	0.3465	0.3859	0.405	0.439	0.44			50000	0.4717	0.4685	0.4825	0.4833	0.4951	0.4956	0.5019	0.5045	0.5159	0.5133	0.5417	0.541
	200000	0.2659	0.2664	0.3027	0.3036	0.3372	0.3466	0.3891	0.4037	0.4284	0.4399	0.4831	0.4629			200000	0.4668	0.4674	0.4824	0.4825	0.4955	0.4967	0.5028	0.5045	0.5161	0.5162	0.5434	0.5442
	[GDC0879] (nM)	5 nM		12.6 nM		31.6 nM		78.4 nM		196 nM		490 nM				[GDC0879] (nM)	20.1 nM		50.2 nM		125.4 nM		313.6 nM		784 nM		1960 nM
	0.01	0.1839	0.1846	0.1839	0.1847	0.1873	0.1866	0.1909	0.1905	0.1879	0.188	0.19	0.1903			0.01	0.1652	0.1643	0.1658	0.1648	0.1677	0.1676	0.1695	0.1687	0.1709	0.1709	0.1922	0.191
	13.1072	0.1805	0.1817	0.1841	0.1832	0.1852	0.1853	0.1895	0.1885	0.1869	0.1859	0.1895	0.1886			13.1072	0.1643	0.1645	0.1652	0.1654	0.1719	0.1712	0.1731	0.1727	0.1747	0.174	0.1928	0.1937
	32.768	0.181	0.1812	0.1817	0.1816	0.1852	0.1846	0.1887	0.1885	0.1877	0.1866	0.1899	0.1887			32.768	0.167	0.1662	0.1706	0.1705	0.1793	0.1795	0.1817	0.1802	0.1794	0.1794	0.1957	0.1966
	81.92	0.1804	0.1807	0.1803	0.1804	0.1839	0.1828	0.186	0.1855	0.185	0.1862	0.189	0.1884			81.92	0.1772	0.1763	0.1868	0.1873	0.2081	0.2073	0.2041	0.2034	0.1937	0.1931	0.2033	0.2019
	204.8	0.1788	0.1784	0.181	0.1784	0.1812	0.1805	0.1831	0.1834	0.1859	0.1833	0.1883	0.1884			204.8	0.199	0.1994	0.2264	0.2252	0.2635	0.2651	0.2609	0.2604	0.2315	0.2282	0.2196	0.2196
	512	0.1779	0.1762	0.176	0.1771	0.1803	0.1792	0.1805	0.1809	0.1829	0.182	0.1866	0.1864			512	0.2325	0.2318	0.2714	0.2739	0.3291	0.3258	0.3499	0.3513	0.3214	0.3163	0.2603	0.2623
	1280	0.1752	0.1749	0.1744	0.1745	0.1772	0.1759	0.1782	0.1777	0.1813	0.1809	0.1854	0.1844			1280	0.2278	0.2244	0.2714	0.2702	0.3306	0.3319	0.3778	0.3778	0.4164	0.4153	0.3609	0.3615
	3200	0.176	0.175	0.174	0.1734	0.1774	0.1777	0.1789	0.178	0.1801	0.1801	0.1844	0.1836			3200	0.2736	0.2738	0.3196	0.3209	0.3773	0.3739	0.418	0.4175	0.4525	0.4505	0.4903	0.4905
	8000	0.1758	0.1745	0.1743	0.1744	0.177	0.1762	0.1773	0.1786	0.1816	0.1817	0.185	0.1855			8000	0.2814	0.2812	0.3301	0.3295	0.3833	0.3824	0.4231	0.4231	0.4575	0.4576	0.5021	0.5004
	20000	0.1749	0.1747	0.1754	0.1741	0.1767	0.1765	0.1804	0.1797	0.1836	0.1836	0.1886	0.1893			20000	0.2845	0.2843	0.334	0.3334	0.3848	0.3867	0.4267	0.4255	0.4575	0.46	0.5058	0.5034
	50000	0.1766	0.1761	0.1755	0.1754	0.179	0.1798	0.1836	0.1825	0.1911	0.1889	0.1984	0.1972			50000	0.2875	0.2861	0.3345	0.3364	0.3863	0.3866	0.429	0.4279	0.4619	0.4618	0.5073	0.5057
	200000	0.1839	0.1837	0.1816	0.182	0.1874	0.189	0.1956	0.197	0.2128	0.2112	0.2308	0.2327			200000	0.2913	0.2936	0.3366	0.3388	0.3885	0.3912	0.4276	0.4307	0.4633	0.4639	0.5074	0.5085
	[TAK632] (nM)	5 nM		12.6 nM		31.6 nM		78.4 nM		196 nM		490 nM				[TAK632] (nM)	20.1 nM		50.2 nM		125.4 nM		313.6 nM		784 nM		1960 nM
	0.01	0.1839	0.1834	0.1842	0.1841	0.1865	0.1877	0.1905	0.189	0.1888	0.1882	0.1894	0.1888			0.01	0.164	0.1658	0.166	0.1638	0.1673	0.1678	0.1705	0.1684	0.1706	0.1713	0.1916	0.1908
	13.1072	0.1952	0.1931	0.1965	0.1968	0.2004	0.1981	0.1961	0.1965	0.1916	0.1913	0.1914	0.1899			13.1072	0.2689	0.2676	0.2363	0.235	0.2059	0.2057	0.1869	0.1855	0.1794	0.1776	0.196	0.1954
	32.768	0.204	0.2035	0.205	0.2063	0.2098	0.2084	0.2034	0.2048	0.1957	0.1959	0.1926	0.1923			32.768	0.3708	0.3605	0.3339	0.3309	0.2643	0.2629	0.2093	0.2108	0.1901	0.1896	0.1999	0.199
	81.92	0.2087	0.2088	0.2104	0.2094	0.2153	0.2157	0.2183	0.2174	0.207	0.2059	0.1979	0.1984			81.92	0.4416	0.4372	0.4456	0.4492	0.3973	0.3894	0.2631	0.2654	0.215	0.2129	0.2098	0.2081
	204.8	0.2109	0.2101	0.2122	0.2113	0.2188	0.2161	0.2247	0.2241	0.2308	0.2277	0.2111	0.2109			204.8	0.4617	0.4603	0.4776	0.4754	0.485	0.4832	0.4206	0.4136	0.2775	0.2712	0.2341	0.2324
	512	0.2152	0.2137	0.218	0.2171	0.2286	0.224	0.2344	0.2308	0.244	0.2458	0.2571	0.2517			512	0.4689	0.467	0.4821	0.4809	0.4924	0.4909	0.5014	0.5014	0.4349	0.4137	0.2832	0.2874
	1280	0.2281	0.2273	0.2323	0.234	0.2494	0.2448	0.2599	0.2605	0.2656	0.2698	0.2855	0.2777			1280	0.472	0.4721	0.4831	0.4859	0.4929	0.4939	0.5045	0.505	0.509	0.5076	0.4429	0.4452
	3200	0.2538	0.2527	0.2599	0.2605	0.2748	0.2651	0.2804	0.2858	0.3037	0.2952	0.3122	0.3179			3200	0.4768	0.4753	0.4846	0.485	0.4971	0.4941	0.5076	0.5059	0.5105	0.5095	0.5383	0.5366
	8000	0.2871	0.291	0.2963	0.2935	0.2998	0.2957	0.3023	0.3042	0.3316	0.3223	0.3404	0.3476			8000	0.4745	0.4761	0.4881	0.487	0.4963	0.4978	0.5098	0.5069	0.5122	0.5153	0.5407	0.5405
	20000	0.3257	0.3216	0.3216	0.3258	0.327	0.3279	0.3395	0.3358	0.3536	0.3717	0.4031	0.3842			20000	0.4743	0.4739	0.4874	0.4873	0.4968	0.4962	0.5071	0.507	0.5129	0.5143	0.5415	0.5426
	50000	0.3558	0.3535	0.3491	0.3432	0.3521	0.3482	0.3498	0.3615	0.3733	0.3808	0.4019	0.4092			50000	0.4738	0.474	0.4873	0.4865	0.4984	0.5008	0.509	0.5111	0.5163	0.5166	0.5474	0.5451
	200000	0.3649	0.3584	0.3581	0.3598	0.3594	0.3693	0.3698	0.372	0.3781	0.3818	0.4162	0.4213			200000	0.4686	0.4674	0.4893	0.4897	0.5037	0.5032	0.5164	0.5161	0.5245	0.5267	0.5518	0.5515
	[AZ628] (nM)	5 nM		12.6 nM		31.6 nM		78.4 nM		196 nM		490 nM				[AZ628] (nM)	20.1 nM		50.2 nM		125.4 nM		313.6 nM		784 nM		1960 nM
	0.1	0.1835	0.1841	0.1843	0.1841	0.1881	0.1863	0.1904	0.19	0.1883	0.1893	0.1891	0.1895			0.1	0.1658	0.1642	0.1643	0.1633	0.167	0.1664	0.1689	0.168	0.1713	0.1704	0.1909*	0.1901*
	13.1072	0.1915	0.1911	0.1931	0.1931	0.1932	0.1937	0.1946	0.1932	0.1901	0.189	0.1899	0.19			13.1072	0.2773	0.2776	0.2297	0.2332	0.1996	0.1964	0.1816	0.1821	0.1761	0.1753	0.1941*	0.1935*
	32.768	0.1942	0.1939	0.1972	0.197	0.2005	0.1991	0.1979	0.1962	0.1922	0.1925	0.192	0.1906			32.768	0.3794	0.3853	0.3201	0.3198	0.2383	0.2382	0.2007	0.2003	0.1845	0.1817	0.1971*	0.196*
	81.92	0.1972	0.1954	0.2012	0.1998	0.2073	0.2082	0.2075	0.2089	0.1976	0.1975	0.193	0.1937			81.92	0.4536	0.4597	0.4552	0.4509	0.3508	0.3369	0.2379	0.2389	0.2016	0.2034	0.2026*	0.2042*
	204.8	0.2015	0.2004	0.2075	0.2062	0.2205	0.2191	0.2351	0.2346	0.2273	0.2204	0.2008	0.201			204.8	0.4749	0.4774	0.4895	0.4899	0.493	0.4919	0.3395	0.3398	0.2415	0.242	0.2194*	0.2212*
	512	0.2153	0.2155	0.2242	0.2239	0.2482	0.2459	0.2631	0.2717	0.2919	0.2937	0.2399	0.2412			512	0.483	0.4838	0.4961	0.4936	0.5057	0.5043	0.5131	0.5104	0.3476	0.3428	0.2584*	0.2581*
	1280	0.2459	0.2462	0.2619	0.2617	0.2978	0.2861	0.3341	0.3256	0.3368	0.3423	0.3453	0.3477			1280	0.4877	0.4867	0.4986	0.5	0.5083	0.5094	0.5183	0.5173	0.5222	0.5225	0.3606*	0.3626*
	3200	0.2947	0.2947	0.3156	0.3164	0.3539	0.3608	0.3869	0.3899	0.4195	0.4173	0.423	0.4321			3200	0.4886	0.4874	0.5018	0.5014	0.5118	0.5091	0.5199	0.5208	0.5274	0.5255	0.555*	0.5516*
	8000	0.3489	0.3567	0.3724	0.3695	0.4025	0.4069	0.4266	0.4333	0.4626	0.4637	0.4836	0.488			8000	0.4917	0.4906	0.5028	0.5023	0.5131	0.5133	0.5243	0.524	0.53	0.5294	0.5605*	0.5617*
	20000	0.4176	0.4054	0.4165	0.42	0.437	0.4316	0.4565	0.4595	0.4775	0.4804	0.5123	0.5105			20000	0.4963	0.495	0.5071	0.5055	0.5171	0.515	0.5282	0.5286	0.535	0.5321	0.568*	0.5657*
	50000	0.4521	0.4534	0.4451	0.4517	0.4546	0.4568	0.4665	0.467	0.4896	0.4882	0.5134	0.514			50000	0.4958	0.4977	0.5086	0.5067	0.5179	0.5171	0.5276	0.5289	0.5361	0.5344	0.5672*	0.5672*
	200000	0.4747	0.4794	0.4742	0.4725	0.4647	0.4688	0.4792	0.4763	0.4906	0.4927	0.5163	0.5155			200000	0.497	0.4966	0.5084	0.5073	0.5176	0.5174	0.5306	0.5289	0.5357	0.5376	0.5679*	0.5709*
	[LY3009120] (nM)	5 nM		12.6 nM		31.6 nM		78.4 nM		196 nM		490 nM				[LY3009120] (nM)	20.1 nM		50.2 nM		125.4 nM		313.6 nM		784 nM		1960 nM
	0.01	0.1847	0.1833	0.1833	0.1839	0.1874	0.1869	0.1913	0.1907	0.1881	0.1891	0.1892	0.189			0.01	0.1652	0.1638	0.1635	0.1652	0.1675	0.1661	0.1694	0.1683	0.172	0.1706	0.191	0.1919
	13.1072	0.1954	0.1953	0.1975	0.1977	0.1998	0.1971	0.1962	0.1955	0.1904	0.1898	0.1904	0.1898			13.1072	0.3331	0.3284	0.2528	0.2552	0.2113	0.2089	0.1861	0.1869	0.1787	0.179	0.1934	0.1955
	32.768	0.1978	0.1986	0.2031	0.2037	0.2118	0.2102	0.2022	0.2029	0.1962	0.1947	0.191	0.1923			32.768	0.4363	0.4374	0.3787	0.3799	0.2666	0.2653	0.2107	0.212	0.1896	0.1886	0.1986	0.1979
	81.92	0.2049	0.2043	0.2107	0.2104	0.2228	0.2242	0.233	0.2281	0.2066	0.2066	0.1973	0.1967			81.92	0.4719	0.4708	0.4775	0.4805	0.4167	0.4171	0.2639	0.2656	0.2147	0.2116	0.2087	0.2083
	204.8	0.2202	0.2198	0.2288	0.2328	0.2468	0.2442	0.266	0.2647	0.2678	0.2674	0.2131	0.2158			204.8	0.4783	0.479	0.4911	0.4911	0.4999	0.499	0.4029	0.4144	0.2664	0.2687	0.2342	0.2325
	512	0.2471	0.2503	0.2625	0.2661	0.2848	0.2868	0.2995	0.3038	0.3127	0.3169	0.2991	0.3042			512	0.4821	0.4804	0.4926	0.4922	0.5016	0.5013	0.5117	0.5119	0.4221	0.4127	0.2792	0.287
	1280	0.2982	0.3033	0.315	0.321	0.3308	0.3303	0.3601	0.3706	0.38	0.376	0.3728	0.3691			1280	0.4813	0.4794	0.4974	0.4957	0.5039	0.5057	0.5152	0.5122	0.5193	0.519	0.4239	0.4323
	3200	0.3552	0.3545	0.3667	0.3579	0.3799	0.3842	0.41	0.4142	0.448	0.4347	0.4559	0.4512			3200	0.4755	0.4753	0.4958	0.4929	0.5062	0.5041	0.5157	0.5149	0.521	0.5208	0.5512	0.5499
	8000	0.3925	0.4019	0.4004	0.3927	0.4145	0.4097	0.449	0.4413	0.4759	0.465	0.5079	0.5051			8000	0.4706	0.4698	0.4905	0.4898	0.5054	0.5052	0.5183	0.518	0.5225	0.5235	0.5549	0.5549
	20000	0.4293	0.4304	0.4317	0.4379	0.4461	0.4492	0.4667	0.4708	0.4969	0.497	0.5239	0.5273			20000	0.4552	0.4558	0.4855	0.4863	0.5032	0.502	0.5186	0.5179	0.524	0.5251	0.5595	0.5583
	50000	0.4429	0.4426	0.4565	0.4535	0.4683	0.4732	0.4824	0.4804	0.5091	0.5026	0.5335	0.5338			50000	0.4467	0.4451	0.4824	0.4795	0.5035	0.5032	0.5212	0.5187	0.5301	0.5282	0.5638	0.5616
	200000	0.3967	0.394	0.4178	0.4227	0.4565	0.4543	0.4782	0.4807	0.5055	0.5079	0.5388	0.5316			200000	0.3888	0.4007	0.4451	0.4413	0.4702	0.4734	0.5141	0.5124	0.5231	0.527	0.563	0.5608
b
	[BRAF] (nM)	sorafenib	AZ628	LY3009120
	5	0.2831	0.4835	0.4301					1/2a KD dimer from heterodimer experiment (nm)						1/2a KD dimer from global analysis of homodimer experiment (nm)
	12.6	0.3326	0.4725	0.4406					rep 1	rep 2	rep 3				KD	SEM
	31.6	0.3744	0.4659	0.4605			sorafenib		3.67	15	40			sorafenib	14.4702	3.1142
	78.4	0.4364	0.4753	0.478			AZ628		4.51	1.94	2.08			AZ628	0.405033	0.275482
	196	0.4676	0.4952	0.5048			LY3009120		0.452	2.87	2.29			LY3009120	1.26256	0.536749
	490	0.5102	0.5271	0.5398
