# Supplementary material for: Allosteric coupling asymmetry mediates paradoxical activation of BRAF by type II inhibitors
Source: eLife journal article supplement (doi:10.7554/elife.95481), 2024-04-03
Supplement: fig1-figsupp10-data1 [file Figure1_figure supplement 10 - source data 1.xlsx]

## Sheet: Sheet1
		[BRAF E586K] (nM)
	[encorafenib] (nM)	560	1120	2241	4482	8964	17927
	200000	0.0916	0.0913	0.0951	0.1028	0.114477	0.133846
	50000	0.0962	0.0927	0.0955	0.1029	0.114286	0.133032
	20000	0.0974	0.0954	0.0967	0.1031	0.115724	0.134208
	8000	0.0952	0.0948	0.096	0.1036	0.118888	0.195385
	3200	0.0964	0.0948	0.0977	0.1148	0.183988	0.217285
	1280	0.0958	0.0952	0.1343	0.1768	0.205273	0.22724
	512	0.0991	0.1128	0.1508	0.185	0.211985	0.228054
	205	0.116	0.1388	0.1702	0.195	0.213039	0.227692
	82	0.1319	0.1501	0.1735	0.1992	0.213519	0.228688
	32	0.1376	0.1538	0.1752	0.1977	0.213998	0.229774
	13	0.1408	0.154	0.1784	0.2004	0.213423	0.228145
	0.1	0.1434	0.1555	0.1782	0.1989	0.215436	0.228416
	[dabrafenib] (nM)	560	1120	2241	4482	8964	17927
	50000	0.1032	0.1076	0.1184	0.1382	0.158869	0.182624
	20000	0.1018	0.1067	0.1195	0.1384	0.157814	0.182262
	8000	0.1021	0.1072	0.1206	0.1375	0.161074	0.213032
	3200	0.1022	0.1076	0.1213	0.1525	0.199233	0.227602
	1280	0.105	0.1099	0.1451	0.1894	0.210547	0.228688
	512	0.1044	0.1258	0.1704	0.1939	0.213806	0.229412
	205	0.109	0.1459	0.1773	0.2	0.214382	0.230588
	82	0.1336	0.1541	0.1788	0.2016	0.21534	0.230407
	32	0.1389	0.1546	0.1801	0.201	0.215436	0.229955
	13	0.1425	0.1562	0.1819	0.202	0.215724	0.230498
	0.1	0.1419	0.1579	0.1799	0.1995	0.216491	0.229955
	[vemurafenib] (nM)	560	1120	2241	4482	8964	17927
	200000	0.1517*	0.1456*	0.1271*	0.1182	0.109108	0.115928		*outlier
	50000	0.1151*	0.1092*	0.1019	0.1022	0.104123	0.151312
	20000	0.1078	0.0979	0.0962	0.0978	0.103164	0.129864
	8000	0.0997	0.0957	0.0927	0.0973	0.138926	0.171946
	3200	0.0986	0.0924	0.0938	0.126	0.168456	0.203891
	1280	0.0994	0.0973	0.1238	0.1608	0.193384	0.221267
	512	0.0975	0.1059	0.1486	0.1835	0.206136	0.226516
	205	0.1196	0.1353	0.1661	0.1951	0.210834	0.228778
	82	0.1303	0.1472	0.1741	0.1984	0.213423	0.230588
	32	0.1379	0.1525	0.1769	0.2013	0.214669	0.230136
	13	0.1393	0.1543	0.1811	0.2013	0.214669	0.230136
	0.1	0.143	0.1586	0.1804	0.2019	0.214094	0.230679
	[LY3009120] (nM)	560	1120	2241	4482	8964	17927
	50000	0.258	0.2615	0.263	0.266	0.265484	0.261991
	20000	0.2526	0.2566	0.2599	0.266	0.263279	0.263801
	8000	0.2541	0.2619	0.2615	0.2659	0.263758	0.242896
	3200	0.2632	0.2665	0.2631	0.2589	0.234516	0.237014
	1280	0.2697	0.2671	0.2361	0.2206	0.225983	0.233032
	512	0.2664	0.2254	0.2019	0.21	0.21908	0.23267
	205	0.2034	0.1874	0.1879	0.2061	0.217929	0.231403
	82	0.1681	0.1713	0.1823	0.2023	0.216587	0.230045
	32	0.1572	0.1652	0.1817	0.2019	0.216012	0.22914
	13	0.1492	0.1605	0.1823	0.2031	0.216203	0.229774
	0.1	0.1431	0.1576	0.1801	0.2009	0.214669	0.229593
