# Supplementary material for: Allosteric coupling asymmetry mediates paradoxical activation of BRAF by type II inhibitors
Source: eLife journal article supplement (doi:10.7554/elife.95481), 2024-04-03
Supplement: fig1-figsupp11-data1 [file Figure1_figure supplement 11 - source data 1.xlsx]

## Sheet: Sheet1
a	[BRAF] (nM)	min chi2/chi2
	664.06	0.24256
	737.84	0.40682
	825.35	0.58599
	922.3	0.75874
	1040.4	0.87993
	1152.9	0.95669
	1255.5	1
	1363	0.90445
	2073.6	0.48284
	2161.1	0.58733
	2219.4	0.6618
	2277.7	0.73757
	2336	0.81164
	2394.3	0.87976
	2452.7	0.93754
	2511	0.97967
	2592	1
	2627.6	0.99394
	2685.9	0.95901
	2744.3	0.89345
	2802.6	0.80232
	2860.9	0.7021
	2919.2	0.60161
	2977.5	0.51112
	3035.9	0.43405
	3094.2	0.37087
	3152.5	0.31935
	3240	0.25989
b		BBD induction
	[belvarafenib] (nM)	symmetric model				asymmetric model
	0.01	0	0	0		0	0	0
	1	0.545706	0.899504	0.922346		0.99382	0.993998	0.99611
	5	1.65588	4.00349	4.22501		4.96522	4.96738	4.97898
	10	2.47725	7.09255	7.6598		9.91917	9.92725	9.95343
	20	3.5191	11.6266	12.8928		19.7792	19.8159	19.8836
	30	4.1781	14.7494	16.5928		29.5387	29.6404	29.7754
	40	4.61277	16.9154	19.1954		39.12	39.3531	39.5998
	50	4.88853	18.3651	20.9557		48.3721	48.8593	49.298
	60	5.04066	19.2462	22.0391		56.9953	57.9598	58.7389
	70	5.09112	19.6586	22.5616		64.4215	66.2303	67.6096
	80	5.05486	19.6739	22.6085		69.7839	72.8708	75.1731
	90	4.94278	19.3467	22.2453		72.3462	76.9396	80.1862
	100	4.76324	18.7201	21.5242		72.1735	78.2697	82.0354
	110	4.52298	17.8296	20.4881		69.9922	77.6186	81.5773
	120	4.22772	16.706	19.1737		66.569	75.8246	79.8927
	130	3.88264	15.3772	17.6141		62.4565	73.4329	77.6205
	140	3.49287	13.871	15.8408		58.0168	70.7528	75.0844
	150	3.06413	12.2174	13.8874		53.4894	67.9593	72.452
	160	2.60384	10.4542	11.7947		49.0382	65.1543	69.8142
	170	2.12325	8.63379	9.62031		44.777	62.398	67.2226
	180	1.6417	6.83644	7.45704		40.7826	59.7268	64.7067
	190	1.19302	5.18087	5.45741		37.1022	57.1618	62.2834
	200	0.824828	3.80556	3.82205		33.7586	54.7146	59.9615
	250	0.204345	1.11419	0.986356		21.7611	44.3094	49.9203
	300	0.107473	0.598329	0.521685		15.262	36.5951	42.2119
	350	0.072469	0.405671	0.35235		11.5399	30.8739	36.2927
	400	0.054597	0.306327	0.265649		9.21148	26.5549	31.6853
	500	0.036531	0.205368	0.177868		6.517	20.5885	25.0945
	600	0.027439	0.154388	0.133644		5.02552	16.7295	20.6776
	700	0.021969	0.123666	0.10702		4.0846	14.0569	17.5428
	800	0.018316	0.103136	0.089238		3.43856	12.1064	15.2147
	900	0.015705	0.088448	0.076521		2.96814	10.6241	13.4225
	1000	0.013745	0.077422	0.066975		2.61053	9.46139	12.0027
	1500	0.008463	0.047689	0.041246		1.62798	6.10302	7.83288
	5000	0.002294	0.012928	0.011179		0.447289	1.74368	2.27042
c	[belvarafenib] (nM)
	5000	2.02437e-06			5.35e-06	6.19e-06	3.71e-06		*empty cells are instances where the standard curve interpolation could not converge on a stable value. Raw values are shown in supplementary figure 10 source data
	1500			3.34e-06	2.57e-06		1.18e-06
	750			1.14e-05	5.07e-06		5.85e-06
	375	1.01614e-05	0.000295	2.09e-05	0.000364	1.18e-05	0.000264
	187.5	0.000562296	0.000829	0.00104	0.001317	0.000477	0.000872
	93.75	0.000801549	0.000837	0.002007	0.001671	0.000771	0.000789
	46.875	0.000733132	0.000759	0.002122	0.000886	0.000659	0.00064
	23.4375	0.000661685	0.000619	0.001307	0.000708	0.00054	0.000684
	11.7188	0.000659155	0.0005	0.001388	0.000958	0.000504	0.000452
	5.85938	0.000579589	0.000399	0.000642	0.000482	0.000362	0.000338
	2.92969	0.000378418	0.000357	0.000536	0.000306	0.0004	0.000281
	0.1	6.61027e-05	6.23e-05	9.14e-05	8.36e-05	5.12e-05	5.82e-05
d		turnover/BBD (s-1) symmetric model				turnover/BBD (s-1) asymmetric model
		0.043094	0.0111517	0.009704		0.003033	0.002803	0.002674
