# Supplementary material for: Allosteric coupling asymmetry mediates paradoxical activation of BRAF by type II inhibitors
Source: eLife journal article supplement (doi:10.7554/elife.95481), 2024-04-03
Supplement: fig2-figsupp1-data1 [file Figure2_figure supplement 1 - source data 1.xlsx]

## Sheet: Sheet1
	lantha screen phospho MEK standard curve
			FRET A/D ratio
		[pMEK] (nM)	rep 1	rep 2
		1000	2.83313	2.68577
		500	2.35121	2.32158
		250	2.14296	2.1353
		125	1.72263	1.65641
		62.5	1.31495	1.29491
		31.25	1.05991	0.988428
		15.625	0.867569	0.824528
		7.8125	0.745749	0.734402
		0	0.892048	0.774862
	Raw FRET kinase data		*values are FRET A/D ratios
replicate 1	[inhibitor] (nM)	GDC0879		Sorafenib		TAK632		AZ628		LY3009120		SB		ponatinib		tovorafenib		belvarafenib		ZM33637		L779450
	5000	1.0696	1.19148	0.625725	0.796069	1.87929	1.65556	0.734665	0.818825	0.769106	0.755112	0.802268	0.817505	0.643461	0.809676	0.890007	0.764112	0.737741	0.711469	1.31422	1.44107	0.878966	0.874354
	1500	1.33318	1.27435	0.781697	0.805988	1.00701	0.975634	0.75718	0.830631	0.674796	0.701713	0.945663	0.989087	0.786786	0.848173	1.13304	1.05601	0.650938	0.708169	1.62977	1.82675	1.09064	1.07264
	750	1.36056	1.27947	0.886907	1.1421	0.954928	0.99515	0.769269	1.08055	0.782915	0.76427	1.10659	1.11336	0.852631	1.38744	1.38672	1.32755	0.677238	0.718869	1.79685	2.0183	1.20965	1.21148
	375	1.32816	1.33214	1.48199	1.7949	1.85662	2.00847	1.91544	2.70661	0.808388	1.09606	1.33577	1.33923	1.8869	2.55876	1.86904	1.84736	0.806875	1.9707	1.95317	2.057	1.34468	1.37926
	187.5	1.39123	1.37045	1.76816	1.85922	2.11556	2.30205	2.70449	3.0548	2.49339	2.81921	1.5712	1.48362	2.70655	2.72512	2.53504	2.36747	2.33642	2.5232	2.04172	2.29695	1.41746	1.3884
	93.75	1.3391	1.31398	1.68671	1.71204	2.16716	2.14767	2.80244	2.65477	2.7672	2.86316	1.43829	1.44467	2.74893	2.76863	2.5284	2.38989	2.50833	2.52757	1.9438	2.07642	1.38136	1.30958
	46.875	1.32289	1.28234	1.55512	1.53387	2.14212	1.89905	2.80798	2.57681	2.74604	2.38565	1.37842	1.28604	2.62814	2.48111	2.47936	2.53557	2.46758	2.48351	1.86025	1.75339	1.416	1.17515
	23.4375	1.25275	1.18462	1.47891	1.5062	1.79568	1.97843	2.57886	2.46075	2.61079	2.27011	1.24858	1.18712	2.35294	2.24419	2.35225	2.27991	2.41861	2.38518	1.63028	1.71144	1.24309	1.21846
	11.7188	1.15114	1.12441	1.4435	1.43545	1.77739	1.77965	2.39193	2.21768	2.41151	2.08774	1.18842	1.18057	2.12919	2.16619	2.07694	2.07186	2.41674	2.27454	1.59101	1.51422	1.27547	1.20966
	5.85938	1.1753	1.14882	1.38278	1.47386	1.71141	1.62344	2.12885	1.96079	2.22284	1.89565	1.1737	1.19385	1.89765		1.88431	1.90281	2.35211	2.14735	1.4798	1.38169	1.29639	1.20923
	2.92969	1.1559	1.18741	1.33824	1.28493	1.64321	1.56791	1.94439	1.70418	1.95806	1.65623	1.15468	1.13879	1.71661	1.6358	1.52912	1.71375	2.11749	2.08345	1.37321	1.29213	1.26236	1.22949
	0.01	1.18691	1.18662	1.23058	1.20476	1.32065	1.38828	1.28769	1.33345	1.29232	1.11024	1.18619	1.20856	1.3173	1.34215	1.27273	1.29703	1.19165	1.1696	1.24011	1.20774	1.24832	1.2222
replicate 2	[inhibitor] (nM)	GDC0879		Sorafenib		TAK632		AZ628		LY3009120		SB		ponatinib		tovorafenib		belvarafenib		ZM33637		L779450
	5000	0.956458	1.1946	0.756792	0.79573	1.85226	1.7115	0.764734	0.675488	0.710055	0.753051	0.75987	0.841506	0.800982	0.83833	0.914112	0.838792	0.505339	0.766513	1.31668	1.26634	0.850476	0.896658
	1500	1.15391	1.17246	0.792182	0.885699	1.02468	1.03746	0.745891	0.70265	0.631823	0.756396	0.921708	0.973945	0.790995	0.811387	1.071	1.01787	0.749177	0.742503	1.65507	1.58656	1.06854	1.09258
	750	1.2182	1.2921	0.893526	1.10686	1.47072	1.7597	0.75582	0.786677	0.693047	0.748867	1.09736	1.13698	0.876568	0.999248	1.28826	1.31173	0.817169	0.764089	1.8512	1.80332	1.23459	1.22579
	375	1.25446	1.24898	1.49871	1.75639	2.01708	2.02659	1.67585	2.20371	0.731865	0.946979	1.20622	1.27516	1.78749	2.39673	1.76173	1.8493	0.892075	2.0951	1.99044	1.8255	1.26034	1.43091
	187.5	1.29476	1.28996	1.76586	1.74252	2.15073	1.96316	2.51226	2.46715	2.00706	2.46224	1.42796	1.43149	2.63398	2.65598	2.32152	2.33781	2.61675	2.70184	2.09344	1.86653	1.40793	1.43377
	93.75	1.26106	1.21715	1.61457	1.56604	1.78601	1.93541	2.68934	2.49987	2.58189	2.67037	1.41049	1.45073	2.54038	2.5196	2.49537	2.26421	2.82366	2.77516	1.98752	1.82358	1.31189	1.33623
	46.875	1.20194	1.25727	1.57055	1.46757	1.674	1.66073	2.63955	2.5763	2.43316	2.24855	1.26184	1.23122	2.48997	2.31773	2.39185	2.48726	2.83708	2.55197	1.90061	1.77635	1.27353	1.31134
	23.4375	1.25439	1.21507	1.43532	1.31939	1.52508	1.58556	2.48716	2.28096	2.28171	2.16683	1.16707	1.16867	2.27962	1.94447	2.19089	2.39958	2.69946	2.45086	1.70008	1.65781	1.19489	1.2129
	11.7188	1.23917	1.17472	1.40131	1.33085	1.44265	1.48747	2.2199	2.06708	2.30257	1.98303	1.19205	1.15676	2.07105	1.83866	2.13096	2.11212	2.71917	2.58437	1.50947	1.51063	1.15593	1.23204
	5.85938	1.27741	1.16727	1.38932	1.35907	1.3326	1.37066	2.02491	1.89152	1.96935	1.78054	1.07851	1.10273	1.68784	1.54121	1.90745	1.9579	2.40395	2.25422	1.49003	1.37403	1.19867	1.21267
	2.92969	1.23659	1.2078	1.35018	1.31301	1.33018	1.34069	1.81573	1.67002	1.80488	1.59978	1.15555	1.16427	1.58354	1.47384	1.852	1.77442	2.31164	1.99351	1.33644	1.3482	1.1693	1.20146
	0.01	1.33324	1.18181	1.22925	1.17456	1.16751	1.24763	1.29682	1.29121	1.27496	1.11682	1.24453	1.22558	1.24979	1.25481	1.24383	1.31746	1.32664	1.28705	1.15614	1.26795	1.25127	1.26054
replicate 3	[inhibitor] (nM)	GDC0879		Sorafenib		TAK632		AZ628		LY3009120		SB		ponatinib		tovorafenib		belvarafenib		ZM33637		L779450
	5000	1.04141	1.1198	0.798326	0.801842	2.13318	1.73344	0.77299	0.75047	0.744001	0.695206	0.805104	0.792737	0.788063	0.833873	0.839589	0.779044	0.773673	0.752379	1.36159	1.40492	0.823463	0.791675
	1500	1.21478	1.21138	0.861531	0.82453	1.12641	1.03695	0.762157	0.757436	0.765369	0.711818	0.894121	0.956676	0.834214	0.616056	0.9886	1.00843	0.696726	0.730368	1.65796	1.73713	0.976718	1.08588
	750	1.24884	1.23488	0.953371	1.0017	0.869167	0.903397	0.747628	0.9176	0.713975	0.801839	1.05863	1.09018	0.826382	1.02163	1.18864	1.31416	0.716474	0.770763	1.82194	1.88231	1.181	1.21623
	375	1.36016	1.34898	1.52832	1.62435	1.64174	1.84645	2.037	2.14909	0.766735	1.57322	1.18178	1.2648	1.306	2.37391	1.55777	1.76607	0.820643	1.9057	1.9413	1.95671	1.2565	1.30867
	187.5	1.35765	1.36306	1.76466	1.68799	1.89735	2.06417	2.39702	2.56646	2.31377	2.54437	1.3622	1.41798	2.51769	2.63834	2.24586	2.34655	2.24859	2.54497	1.96995	1.98792	1.38376	1.3752
	93.75	1.37158	1.39438	1.66515	1.5537	1.99689	1.9709	2.41697	2.41845	2.4596	2.49479	1.41591	1.46562	2.57785	2.54435	2.34239	2.44834	2.49086	2.50126	1.94692	1.88817	1.30668	1.33086
	46.875	1.38764	1.37023	1.63015	1.55908	1.93792	1.81801	2.47437	2.38614	2.46293	2.3075	1.33277	1.30087	2.46388	2.45711	2.28093	2.52608	2.4169	2.40191	1.84645	1.7263	1.32111	1.28502
	23.4375	1.33509	1.32222	1.55557	1.43829		1.78829	2.24716	2.25969	2.40083	2.27311	1.20557	1.31244	2.32948	2.14995	2.14663	2.32587	2.31488	2.43454	1.67135	1.5882	1.25751	1.259
	11.7188	1.2106	1.27077	1.42059	1.30672	1.61231	1.58576	2.08148	1.88285	2.24077	1.86996	1.18121	1.24523	2.00789	1.97214	2.22959	2.0656	2.27875	2.2183	1.51504	1.46542	1.15768	1.21979
	5.85938	1.23063	1.22256	1.39211	1.28788	1.42099	1.42221	1.91177	1.81599	2.03029	1.91365	1.14364	1.3054	1.86995	1.70491	1.82858	1.88473	2.09104	2.05104	1.41082	1.31518	1.22215	1.21196
	2.92969	1.18446	1.20183	1.39641	1.34385	1.45539	1.43068	1.66067	1.69024	1.74667	1.73128	1.19253	1.21753	1.73736	1.59648	1.76184	1.70559	2.14957	1.94168	1.34776	1.33473	1.21595	1.21221
	0.01	1.17524	1.24779	1.29475	1.20608	1.24578	1.24294	1.23797	1.27894	1.18675	1.18544	1.21129	1.32417	1.28674	1.32	1.25843	1.37043	1.10248	1.14547	1.18459	1.23643	1.18192	1.36813
	values reported below are interpolated from the standard curve and A/D values shown above and reported as turnover (s-1). Blank cells indicate that the interpolation was not able to converge to a defined value.
	[inhibitor] (nM)	GDC0879 (Interpolated)						sorafenib (Interpolated)						TAK632 (Interpolated)						AZ628 (Interpolated)						LY3009120 (Interpolated)						SB (Interpolated)						ponatinib (Interpolated)						tovorafenib (Interpolated)
	5000	4.60823e-05	6.60734e-05	2.95442e-05	6.66176e-05	4.17933e-05	5.40212e-05		8.85775e-06	4.21926e-06	8.81703e-06	9.12903e-06	9.55272e-06	0.000253044	0.000172798	0.000241828	0.000190449	0.000388836	0.000197766	1.6733e-06	1.16175e-05	5.14474e-06		6.11342e-06	3.48699e-06	5.65687e-06	4.02429e-06		3.78548e-06	2.74172e-06		9.60413e-06	1.14558e-05	4.5772e-06	1.44228e-05	9.94695e-06	8.45817e-06		1.05013e-05	9.44897e-06	1.40266e-05	7.8996e-06	1.34725e-05	2.06129e-05	5.07198e-06	2.37906e-05	1.40841e-05	1.41835e-05	6.82807e-06
	1500	9.27513e-05	8.11752e-05	5.96462e-05	6.27883e-05	7.01859e-05	6.95805e-05	7.14241e-06	1.0054e-05	8.39173e-06	2.00522e-05	1.69463e-05	1.23178e-05	3.67143e-05	3.22244e-05	3.93027e-05	4.12013e-05	5.50956e-05	4.11255e-05	4.26433e-06	1.30707e-05	2.95904e-06		4.84376e-06	4.29408e-06				4.17328e-06	5.219e-06		2.80562e-05	3.41335e-05	2.48063e-05	3.19864e-05	2.11504e-05	2.95744e-05	7.74738e-06	1.5258e-05	8.24973e-06	1.07094e-05	1.35148e-05		5.61812e-05	4.39997e-05	4.62993e-05	3.82997e-05	3.4064e-05	3.69211e-05
	750	9.84034e-05	8.21546e-05	7.07982e-05	8.45892e-05	7.63835e-05	7.38161e-05	2.02092e-05	5.76757e-05	2.10725e-05	5.19363e-05	2.91172e-05	3.59459e-05	2.93324e-05	3.50018e-05	0.000123051	0.000206834	1.79205e-05	2.23695e-05	5.67599e-06	4.77813e-05	4.10642e-06	7.7344e-06	3.15908e-06	2.42561e-05	7.28697e-06	5.09049e-06		3.30194e-06		9.55236e-06	5.18939e-05	5.29808e-05	5.04244e-05	5.68299e-05	4.44004e-05	4.92897e-05	1.58193e-05	0.000104127	1.88709e-05	3.55915e-05	1.2546e-05	3.88529e-05	0.000103973	9.16111e-05	8.38459e-05	8.84428e-05	6.55777e-05	8.89267e-05
	375	9.17332e-05	9.25404e-05	7.74278e-05	7.64104e-05	9.83194e-05	9.59912e-05	0.000125761	0.000219559	0.000129851	0.000205672	0.000137307	0.000163528	0.000243603	0.000314272	0.000318873	0.000324035	0.000168644	0.000239481	0.000268836	0.00133556	0.00017904	0.000440156	0.000329794	0.000399752	1.0345e-05	5.02179e-05	1.35443e-06	2.82368e-05	5.37889e-06	0.000149159	9.32783e-05	9.39856e-05	6.86634e-05	8.13305e-05	6.43889e-05	7.93672e-05	0.000256287	0.000900441	0.000216823	0.000632959	8.73101e-05	0.000604843	0.000248731	0.000239847	0.000207549	0.000240628	0.000145003	0.000209087
	187.5	0.000104948	0.000100489	8.51062e-05	8.41755e-05	9.77953e-05	9.89292e-05	0.000209832	0.00024467	0.000209011	0.000200859	0.000208585	0.000182862	0.000377159	0.000526773	0.000400897	0.000291218	0.000260813	0.000345368	0.00132702		0.000808664	0.000732448	0.00063333	0.000917176	0.000775404	0.00197172	0.000313526	0.000724811	0.000538541	0.00087041	0.000148611	0.000126157	0.000113101	0.000113904	9.8747e-05	0.000110852	0.00133529	0.00141404	0.00108749	0.00115411	0.000818618	0.00110017	0.000851743	0.000597234	0.000546506	0.000563796	0.000474848	0.000573375
	93.75	9.3958e-05	8.88909e-05	7.86634e-05	7.0611e-05	0.000100729	0.000105634	0.000182455	0.000190627	0.000160706	0.000147218	0.000175727	0.000143922	0.000412595	0.000398759	0.000216282	0.000277982	0.000308203	0.000295025	0.00184669	0.00115025	0.00126866	0.000786594	0.000659472	0.00066147	0.00162476	0.00238272	0.00095219	0.00120134	0.000720751	0.000777802	0.000115458	0.000116929	0.00010918	0.000118336	0.000110387	0.000121839	0.00152709	0.00163282	0.000862348	0.000822175	0.00094282	0.000870369	0.000838826	0.000624343	0.000778805	0.000491045	0.000568786	0.00070379
	46.875	9.06717e-05	8.27048e-05	6.79068e-05	7.79524e-05	0.000104172	0.000100443	0.000144297	0.000138734	0.000148435	0.0001223	0.000165221	0.000145352	0.000394924	0.000261559	0.000178465	0.000174373	0.000279155	0.00022829	0.00188645	0.000940432	0.00110376	0.000939271	0.000743909	0.000619694	0.00151258	0.000619086	0.000681826	0.000477182	0.000725874	0.000532206	0.000102188	8.34169e-05	7.8809e-05	7.31498e-05	9.26688e-05	8.63006e-05	0.00107084	0.000754863	0.000769608	0.00054259	0.000727357	0.000716951	0.000751989	0.000852781	0.000626795	0.000765049	0.000506429	0.000834396
	23.4375	7.71106e-05	6.48808e-05	7.74149e-05	7.02377e-05	9.31403e-05	9.05379e-05	0.000125017	0.000131712	0.000114778	8.99704e-05	0.000144418	0.000115459	0.000219847	0.000298781	0.000136476	0.000152538		0.000217118	0.000945151	0.000722519	0.000764873	0.000506453	0.000475974	0.000486985	0.00102373	0.000496398	0.000507156	0.000412357	0.000638211	0.000499155	7.63355e-05	6.53146e-05	6.1869e-05	6.21406e-05	6.85483e-05	8.85841e-05	0.000580524	0.000473408	0.000505195	0.000282233	0.000554862	0.000400349	0.000579744	0.000505473	0.000430236	0.000636609	0.000398039	0.000551058
	11.7188	5.91819e-05	5.47691e-05	7.46008e-05	6.31754e-05	6.94409e-05	8.04962e-05	0.000116658	0.000114807	0.000107152	9.22777e-05	0.000111437	8.74515e-05	0.000213145	0.000213963	0.000116462	0.000127092	0.000160056	0.000152594	0.000626903	0.000451289	0.000453088	0.000347083	0.00035572	0.000254555	0.000652167	0.000359549	0.000527292	0.000301099	0.000470475	0.000249115	6.55404e-05	6.41815e-05	6.6172e-05	6.01244e-05	6.42906e-05	7.57161e-05	0.000386157	0.000411893	0.000349442	0.000236365	0.000313966	0.00029564	0.000352969	0.000349921	0.000387341	0.000374934	0.000461057	0.000346212
	5.85938	6.32741e-05	5.87941e-05	8.17603e-05	6.19037e-05	7.30418e-05	7.15819e-05	0.000103121	0.000123804	0.000104534	9.80911e-05	0.000105141	8.3772e-05	0.000190421	0.000163264	9.26342e-05	0.000100534	0.000111527	0.000111802	0.000385931	0.000290063	0.000323116	0.000258282	0.00026719	0.000227517	0.000455486	0.000260071	0.000294259	0.000214287	0.000326069	0.000268033	6.30005e-05	6.64869e-05	4.74632e-05	5.12775e-05	5.79322e-05	8.71912e-05	0.000260944		0.000182813	0.000140639	0.000249109	0.000188298	0.00025518	0.000263212	0.000265263	0.000288662	0.000232393	0.000255359
	2.92969	5.99796e-05	6.53646e-05	7.41293e-05	6.8943e-05	6.48532e-05	6.78868e-05	9.37827e-05	8.32023e-05	9.62413e-05	8.86982e-05	0.000106077	9.4934e-05	0.000169085	0.000147722	9.21417e-05	9.42836e-05	0.000119424	0.00011372	0.000282197	0.000188059	0.000227416	0.000177229	0.000174353	0.000183577	0.000288741	0.000173001	0.000223292	0.000156502	0.000202288	0.000197034	5.97746e-05	5.71284e-05	5.99208e-05	6.13937e-05	6.62551e-05	7.06786e-05	0.000192133	0.000166884	0.000151982	0.000123799	0.000199096	0.000155576	0.00013751	0.000191189	0.00024172	0.000212073	0.000207589	0.000188518
	0.01	6.52771e-05	6.52273e-05	9.27639e-05	6.43947e-05	6.32647e-05	7.61894e-05	7.3034e-05	6.84051e-05	7.27916e-05	6.31469e-05	8.51052e-05	6.86377e-05	9.02222e-05	0.000104309	6.19431e-05	7.616e-05	7.58174e-05	7.52939e-05	8.37359e-05	9.2806e-05	8.55098e-05	8.44169e-05	7.43809e-05	8.2052e-05	8.46333e-05	5.24783e-05	8.12918e-05	5.3539e-05	6.525e-05	6.50223e-05	6.51518e-05	6.90784e-05	7.55875e-05	7.21264e-05	6.95641e-05	9.09287e-05	8.95522e-05	9.45844e-05	7.65592e-05	7.74936e-05	8.3552e-05	9.00912e-05	8.0868e-05	8.55488e-05	7.54582e-05	8.95846e-05	7.81705e-05	0.000100485
[truncated: 31 more columns]
