# Supplementary material for: Allosteric coupling asymmetry mediates paradoxical activation of BRAF by type II inhibitors
Source: eLife journal article supplement (doi:10.7554/elife.95481), 2024-04-03
Supplement: fig2-figsupp2-data1 [file Figure2_figure supplement 2 - source data 1.xlsx]

## Sheet: Sheet1
a
		BBD induction amplitude (%)
	GDC0879	7.55947	2.09721	3.05416
	L779450	9.93017	11.4751	11.4414
	SB590885	11.7525	10.6183	10.1866
	sorafenib	25.9748	19.8754	9.82486
	ZM336372	38.6906	36.1245	39.8328
	TAK632	18.8964	7.76633	4.8606
	MLN2480	35.2874	44.3432	49.8897
	AZ628	47.3264	72.7706	71.8272
	belvarafenib	72.3462	78.2697	82.0354
	ponatinib	68.6657	55.2829	82.8363
	LY3009120	85.0608	65.9227	73.3566
b
		turnover at peak (s-1)
	GDC0879	0.018718	0.001113
	L779450	0.020741	0.001028
	SB590885	0.024151	0.001255
	sorafenib	0.040572	0.003453
	ZM336372	0.064986	0.004582
	TAK632	0.072594	0.0092
	MLN2480	0.142679	0.010958
	AZ628	0.2174	0.034487
	belvarafenib	0.219397	0.036306
	ponatinib	0.240565	0.02281
	LY3009120	0.243796	0.045147
