# Supplementary material for: Allosteric coupling asymmetry mediates paradoxical activation of BRAF by type II inhibitors
Source: eLife journal article supplement (doi:10.7554/elife.95481), 2024-04-03
Supplement: fig3-figsupp1-data1 [file Figure3_figure supplement 1 - source data 1.xlsx]

## Sheet: Sheet1
c		P®
	Distance (Å)	aC-out (apo)	aC-in (GDC0879)
	0.05	0	0
	0.15	0	0
	0.25	0	0
	0.35	0	0
	0.45	0	0
	0.55	0	0
	0.65	0	0
	0.75	0	0
	0.85	0	0
	0.95	0	0
	1.05	0	0
	1.15	0	0
	1.25	0	0
	1.35	0	0
	1.45	0	0
	1.55	0	0
	1.65	0	0
	1.75	0	0
	1.85	0	0
	1.95	0	0
	2.05	0	0.01
	2.15	0	0.02
	2.25	0	0.02
	2.35	0	0.06
	2.45	0	0.1
	2.55	0	0.15
	2.65	0	0.25
	2.75	0	0.36
	2.85	0	0.53
	2.95	0	0.67
	3.05	0	0.86
	3.15	0	0.91
	3.25	0	0.95
	3.35	0	0.96
	3.45	0.01	1
	3.55	0.02	1
	3.65	0.03	0.92
	3.75	0.06	0.84
	3.85	0.11	0.76
	3.95	0.18	0.64
	4.05	0.28	0.45
	4.15	0.39	0.3
	4.25	0.5	0.19
	4.35	0.64	0.08
	4.45	0.78	0.02
	4.55	0.92	0.01
	4.65	0.99	0
	4.75	1	0
	4.85	0.92	0
	4.95	0.73	0
	5.05	0.51	0
	5.15	0.28	0
	5.25	0.13	0
	5.35	0.03	0
	5.45	0	0
	5.55	0	0
	5.65	0	0
	5.75	0	0
	5.85	0	0
	5.95	0	0
	6.05	0	0
	6.15	0	0
	6.25	0	0
	6.35	0	0
	6.45	0	0
	6.55	0	0
	6.65	0	0
	6.75	0	0
	6.85	0	0
	6.95	0	0
	7.05	0	0
	7.15	0	0
	7.25	0	0
	7.35	0	0
	7.45	0	0
	7.55	0	0
	7.65	0	0
	7.75	0	0
	7.85	0	0
	7.95	0	0
	8.05	0	0
	8.15	0	0
	8.25	0	0
	8.35	0	0
	8.45	0	0
	8.55	0	0
	8.65	0	0
	8.75	0	0
	8.85	0	0
	8.95	0	0
	9.05	0	0
	9.15	0	0
	9.25	0	0
	9.35	0	0
	9.45	0	0
	9.55	0	0
	9.65	0	0
	9.75	0	0
	9.85	0	0
d
	evolution time (μs)	apo	GDC0879	TAK-632	AZ-628	LY-3009120		Distance (angstroms)	apo	GDC0879	TAK-632	AZ-628	LY-3009120
	0	1.01607	1.00968	1.00666	0.991694	1.01265		10	1.93e-11	7.89e-06	4.04e-07	5.6e-08	3.25e-08
	0.008	0.997204	1.00686	1.02963	1.01389	1.00528		10.1761	2.55e-11	9.14e-06	4.87e-07	6.85e-08	4.08e-08
	0.016	1.00004	1.00207	0.996488	0.994028	0.988825		10.3523	3.36e-11	1.06e-05	5.87e-07	8.37e-08	5.11e-08
	0.024	1.01146	1.00329	0.989137	1.00807	1.00217		10.5284	4.43e-11	1.23e-05	7.07e-07	1.02e-07	6.39e-08
	0.032	1.01296	0.986527	0.973024	0.998554	0.982226		10.7045	5.83e-11	1.42e-05	8.49e-07	1.24e-07	7.98e-08
	0.04	1.00052	0.969918	0.999095	0.97741	0.971802		10.8806	7.65e-11	1.63e-05	1.02e-06	1.51e-07	9.95e-08
	0.048	1.00023	0.933888	0.964492	0.995183	0.963772		11.0567	1e-10	1.89e-05	1.22e-06	1.84e-07	1.24e-07
	0.056	0.992022	0.922334	0.926674	0.960451	0.937566		11.2329	1.31e-10	2.17e-05	1.46e-06	2.24e-07	1.54e-07
	0.064	0.980531	0.901915	0.933003	0.950771	0.933851		11.409	1.71e-10	2.5e-05	1.75e-06	2.71e-07	1.91e-07
	0.072	0.9639	0.889684	0.900552	0.932189	0.908826		11.5851	2.23e-10	2.88e-05	2.09e-06	3.28e-07	2.36e-07
	0.08	0.955938	0.847658	0.891431	0.914945	0.903324		11.7613	2.91e-10	3.31e-05	2.49e-06	3.97e-07	2.92e-07
	0.088	0.957335	0.829457	0.852023	0.888572	0.874286		11.9374	3.78e-10	3.79e-05	2.97e-06	4.8e-07	3.61e-07
	0.096	0.930925	0.80672	0.816477	0.889773	0.848071		12.1135	4.91e-10	4.35e-05	3.54e-06	5.78e-07	4.45e-07
	0.104	0.931753	0.779704	0.829177	0.851989	0.83653		12.2896	6.36e-10	4.98e-05	4.2e-06	6.97e-07	5.47e-07
	0.112	0.905525	0.757377	0.771861	0.85499	0.805616		12.4657	8.23e-10	5.7e-05	4.99e-06	8.39e-07	6.73e-07
	0.12	0.915374	0.724842	0.755441	0.81214	0.801822		12.6419	1.06e-09	6.52e-05	5.91e-06	1.01e-06	8.25e-07
	0.128	0.879756	0.701048	0.719194	0.804861	0.785261		12.818	1.37e-09	7.45e-05	7e-06	1.21e-06	1.01e-06
	0.136	0.887634	0.659566	0.709648	0.764208	0.750237		12.9941	1.76e-09	8.5e-05	8.28e-06	1.45e-06	1.24e-06
	0.144	0.85131	0.650802	0.711554	0.754667	0.729629		13.1702	2.27e-09	9.69e-05	9.77e-06	1.74e-06	1.51e-06
	0.152	0.850063	0.609478	0.667445	0.743893	0.716111		13.3464	2.91e-09	0.00011	1.15e-05	2.07e-06	1.84e-06
	0.16	0.815468	0.584171	0.662496	0.710097	0.690581		13.5225	3.72e-09	0.000126	1.36e-05	2.48e-06	2.24e-06
	0.168	0.818184	0.554355	0.622215	0.686172	0.660723		13.6986	4.76e-09	0.000143	1.6e-05	2.95e-06	2.72e-06
	0.176	0.800445	0.538938	0.600746	0.676519	0.63674		13.8748	6.07e-09	0.000162	1.88e-05	3.52e-06	3.3e-06
	0.184	0.786186	0.52016	0.577561	0.660739	0.613567		14.0509	7.74e-09	0.000184	2.2e-05	4.18e-06	4e-06
	0.192	0.761175	0.482266	0.551727	0.614581	0.585622		14.227	9.85e-09	0.000208	2.58e-05	4.97e-06	4.84e-06
	0.2	0.751727	0.479777	0.543419	0.590195	0.566502		14.4031	1.25e-08	0.000236	3.02e-05	5.89e-06	5.84e-06
	0.208	0.729059	0.441728	0.522573	0.562871	0.547876		14.5793	1.59e-08	0.000267	3.53e-05	6.98e-06	7.04e-06
	0.216	0.723536	0.432117	0.487837	0.546077	0.533077		14.7554	2.01e-08	0.000302	4.12e-05	8.26e-06	8.48e-06
	0.224	0.695227	0.404629	0.474974	0.557674	0.498307		14.9315	2.54e-08	0.00034	4.8e-05	9.77e-06	1.02e-05
	0.232	0.68044	0.373356	0.440905	0.518974	0.482353		15.1076	3.2e-08	0.000384	5.59e-05	1.15e-05	1.22e-05
	0.24	0.660607	0.336961	0.416474	0.494778	0.464615		15.2838	4.03e-08	0.000432	6.5e-05	1.36e-05	1.46e-05
	0.248	0.663233	0.333008	0.418455	0.492047	0.442503		15.4599	5.07e-08	0.000487	7.55e-05	1.6e-05	1.75e-05
	0.256	0.634691	0.300733	0.376793	0.460053	0.423448		15.636	6.37e-08	0.000547	8.75e-05	1.88e-05	2.09e-05
	0.264	0.60647	0.292065	0.346536	0.435807	0.410914		15.8121	7.98e-08	0.000615	0.000101	2.21e-05	2.49e-05
	0.272	0.598596	0.273778	0.327836	0.412585	0.391886		15.9883	9.99e-08	0.00069	0.000117	2.59e-05	2.97e-05
	0.28	0.586673	0.258173	0.322527	0.398571	0.354468		16.1644	1.25e-07	0.000774	0.000136	3.03e-05	3.53e-05
	0.288	0.570418	0.237988	0.299197	0.360654	0.361637		16.3405	1.56e-07	0.000866	0.000156	3.55e-05	4.19e-05
	0.296	0.534192	0.203409	0.267363	0.369452	0.336082		16.5166	1.94e-07	0.000969	0.00018	4.14e-05	4.96e-05
	0.304	0.522191	0.209383	0.247394	0.335973	0.298034		16.6928	2.41e-07	0.001084	0.000208	4.83e-05	5.87e-05
	0.312	0.528859	0.209395	0.245436	0.326868	0.277235		16.8689	2.99e-07	0.00121	0.000239	5.63e-05	6.93e-05
	0.32	0.477949	0.164761	0.23398	0.302629	0.279449		17.045	3.7e-07	0.00135	0.000274	6.55e-05	8.17e-05
	0.328	0.460684	0.154731	0.202363	0.281399	0.265996		17.2211	4.58e-07	0.001505	0.000314	7.61e-05	9.62e-05
	0.336	0.470228	0.138203	0.22216	0.280118	0.243812		17.3973	5.66e-07	0.001676	0.00036	8.84e-05	0.000113
	0.344	0.435593	0.136402	0.170986	0.260153	0.241688		17.5734	6.97e-07	0.001864	0.000411	0.000102	0.000133
	0.352	0.423309	0.120259	0.15778	0.246468	0.223592		17.7495	8.58e-07	0.002071	0.00047	0.000119	0.000156
	0.36	0.417299	0.113875	0.1414	0.238218	0.200987		17.9256	1.05e-06	0.0023	0.000536	0.000137	0.000182
	0.368	0.401804	0.095656	0.100983	0.195393	0.171688		18.1018	1.29e-06	0.002551	0.000611	0.000158	0.000212
	0.376	0.380993	0.073407	0.113841	0.201194	0.177369		18.2779	1.58e-06	0.002826	0.000695	0.000183	0.000248
	0.384	0.348846	0.073028	0.118284	0.178332	0.158268		18.454	1.94e-06	0.003128	0.00079	0.00021	0.000288
	0.392	0.356632	0.042044	0.105782	0.171346	0.144548		18.6301	2.36e-06	0.003459	0.000896	0.000242	0.000335
	0.4	0.339087	0.053171	0.070464	0.138247	0.147709		18.8063	2.88e-06	0.003822	0.001016	0.000278	0.000389
	0.408	0.344756	0.043867	0.076385	0.158807	0.122414		18.9824	3.51e-06	0.004218	0.00115	0.000319	0.000451
	0.416	0.306675	0.031947	0.047028	0.136549	0.117242		19.1585	4.26e-06	0.004651	0.001301	0.000365	0.000522
	0.424	0.29941	0.034495	0.048846	0.119335	0.102105		19.3346	5.16e-06	0.005123	0.001469	0.000418	0.000603
	0.432	0.28204	0.016517	0.067685	0.11646	0.091239		19.5108	6.25e-06	0.005638	0.001656	0.000478	0.000695
	0.44	0.283992	0.004724	0.025683	0.091037	0.086071		19.6869	7.55e-06	0.006198	0.001866	0.000545	0.0008
	0.448	0.262811	0.017119	0.018232	0.113015	0.056268		19.863	9.11e-06	0.006807	0.002099	0.000621	0.00092
	0.456	0.2478	-0.02196	0.019225	0.075416	0.065274		20.0391	1.1e-05	0.007469	0.002358	0.000707	0.001056
	0.464	0.237074	-0.00273	0.011263	0.085864	0.073259		20.2153	1.32e-05	0.008187	0.002645	0.000804	0.00121
	0.472	0.210457	-0.02032	-0.00994	0.043208	0.057864		20.3914	1.58e-05	0.008965	0.002964	0.000913	0.001385
	0.48	0.214327	-0.01723	-0.02536	0.031113	0.046457		20.5675	1.9e-05	0.009808	0.003318	0.001036	0.001582
	0.488	0.174713	-0.02125	-0.0309	0.027133	0.033169		20.7436	2.27e-05	0.010719	0.003708	0.001173	0.001804
	0.496	0.173397	-0.03277	-0.01375	0.031224	0.019782		20.9198	2.72e-05	0.011703	0.00414	0.001327	0.002054
	0.504	0.17299	-0.0247	-0.03723	0.036202	0.034037		21.0959	3.24e-05	0.012765	0.004615	0.001499	0.002335
	0.512	0.168563	-0.02879	-0.03806	0.009378	-0.00187		21.272	3.86e-05	0.013911	0.005139	0.001691	0.002651
	0.52	0.176293	-0.03745	-0.03526	0.009418	0.005582		21.4481	4.58e-05	0.015143	0.005715	0.001906	0.003004
	0.528	0.146615	-0.04394	-0.05265	0.002832	0.007491		21.6243	5.44e-05	0.01647	0.006347	0.002144	0.003399
	0.536	0.123727	-0.05342	-0.05511	-0.00243	-0.01062		21.8004	6.44e-05	0.017894	0.007041	0.00241	0.00384
	0.544	0.122896	-0.04994	-0.04558	0.004565	-0.02955		21.9765	7.62e-05	0.019423	0.0078	0.002705	0.004331
	0.552	0.118672	-0.06137	-0.05063	-0.02866	-0.02077		22.1526	9e-05	0.021062	0.00863	0.003032	0.004878
	0.56	0.117827	-0.08626	-0.0753	-0.0147	-0.04201		22.3288	0.000106	0.022816	0.009536	0.003395	0.005484
	0.568	0.099561	-0.06843	-0.05115	-0.02794	-0.03384		22.5049	0.000125	0.024693	0.010523	0.003796	0.006157
	0.576	0.072792	-0.0615	-0.06163	-0.05382	-0.03796		22.681	0.000147	0.026698	0.011598	0.004239	0.0069
	0.584	0.07609	-0.06382	-0.06901	-0.04774	-0.03776		22.8571	0.000172	0.028837	0.012767	0.004727	0.007722
	0.592	0.089684	-0.07533	-0.06982	-0.04539	-0.04934		23.0333	0.000202	0.031117	0.014036	0.005265	0.008627
	0.6	0.061206	-0.07665	-0.09489	-0.02853	-0.05939		23.2094	0.000236	0.033544	0.01541	0.005857	0.009623
	0.608	0.045534	-0.09235	-0.11029	-0.05876	-0.07867		23.3855	0.000275	0.036126	0.016898	0.006507	0.010717
	0.616	0.042979	-0.07626	-0.09551	-0.06594	-0.07866		23.5616	0.000321	0.038867	0.018507	0.007219	0.011917
	0.624	0.052831	-0.08013	-0.10616	-0.07533	-0.06877		23.7378	0.000373	0.041776	0.020242	0.007999	0.01323
	0.632	0.034877	-0.0633	-0.08256	-0.06919	-0.06498		23.9139	0.000433	0.044859	0.022111	0.008853	0.014664
	0.64	0.032587	-0.06598	-0.09982	-0.09265	-0.07127		24.09	0.000502	0.048122	0.024123	0.009784	0.016228
	0.648	0.050456	-0.08226	-0.11523	-0.07594	-0.06288		24.2661	0.000581	0.051572	0.026284	0.0108	0.017931
	0.656	0.011783	-0.08445	-0.10265	-0.09626	-0.07808		24.4423	0.000672	0.055214	0.028602	0.011906	0.01978
	0.664	0.003103	-0.09124	-0.11483	-0.07848	-0.07095		24.6184	0.000775	0.059056	0.031085	0.013108	0.021786
	0.672	0.004167	-0.06728	-0.07449	-0.08508	-0.06755		24.7945	0.000893	0.063104	0.03374	0.014413	0.023957
	0.68	-0.00461	-0.08358	-0.09596	-0.10231	-0.07839		24.9706	0.001027	0.067363	0.036575	0.015828	0.026303
	0.688	-0.01534	-0.09463	-0.08398	-0.08641	-0.09818		25.1468	0.001179	0.071839	0.039598	0.017359	0.028833
	0.696	-0.03013	-0.08099	-0.10638	-0.10254	-0.08363		25.3229	0.001352	0.076537	0.042817	0.019013	0.031556
	0.704	-0.01743	-0.10322	-0.09748	-0.09837	-0.08542		25.499	0.001547	0.081462	0.046237	0.020799	0.034481
	0.712	-0.01237	-0.09704	-0.11201	-0.10866	-0.08434		25.6752	0.001767	0.08662	0.049868	0.022723	0.037618
	0.72	-0.0288	-0.0946	-0.11678	-0.09599	-0.09796		25.8513	0.002015	0.092013	0.053714	0.024793	0.040975
	0.728	-0.01947	-0.07678	-0.0783	-0.10987	-0.09774		26.0274	0.002294	0.097647	0.057784	0.027016	0.044562
	0.736	-0.03789	-0.0721	-0.10952	-0.1144	-0.10838		26.2035	0.002608	0.103524	0.062083	0.029402	0.048385
	0.744	-0.04183	-0.09578	-0.12996	-0.10628	-0.08722		26.3796	0.002959	0.109647	0.066617	0.031957	0.052453
	0.752	-0.04958	-0.09367	-0.08907	-0.1107	-0.09903		26.5558	0.003353	0.116019	0.07139	0.034689	0.056772
	0.76	-0.06102	-0.07904	-0.1092	-0.11185	-0.10612		26.7319	0.003793	0.12264	0.076408	0.037606	0.061351
	0.768	-0.06087	-0.08408	-0.11717	-0.09187	-0.09687		26.908	0.004283	0.129512	0.081675	0.040716	0.066193
	0.776	-0.05511	-0.08618	-0.1272	-0.13095	-0.09915		27.0842	0.004828	0.136636	0.087193	0.044027	0.071304
	0.784	-0.06262	-0.08262	-0.10904	-0.11116	-0.09993		27.2603	0.005434	0.144009	0.092965	0.047546	0.076689
	0.792	-0.06284	-0.08269	-0.0868	-0.11854	-0.1085		27.4364	0.006105	0.151632	0.098993	0.05128	0.082349
	0.8	-0.06243	-0.07591	-0.12116	-0.10656	-0.11017		27.6125	0.006849	0.159502	0.105278	0.055236	0.088287
	0.808	-0.08002	-0.08479	-0.08555	-0.10311	-0.10787		27.7887	0.00767	0.167616	0.111818	0.05942	0.094503
	0.816	-0.08836	-0.07315	-0.08182	-0.08942	-0.11007		27.9648	0.008575	0.17597	0.118614	0.06384	0.100997
	0.824	-0.08113	-0.07221	-0.10183	-0.11549	-0.12236		28.1409	0.009572	0.18456	0.125662	0.0685	0.107766
	0.832	-0.08336	-0.08493	-0.09727	-0.1082	-0.10026		28.317	0.010666	0.193378	0.13296	0.073405	0.114806
	0.84	-0.07789	-0.06309	-0.10057	-0.13435	-0.11081		28.4931	0.011867	0.20242	0.140502	0.078561	0.122113
	0.848	-0.0771	-0.07176	-0.11376	-0.12771	-0.12095		28.6693	0.01318	0.211677	0.148283	0.083971	0.129679
	0.856	-0.09714	-0.08018	-0.10143	-0.09299	-0.09833		28.8454	0.014614	0.22114	0.156296	0.089637	0.137497
	0.864	-0.09201	-0.06861	-0.08301	-0.11019	-0.11079		29.0215	0.016178	0.2308	0.164532	0.095563	0.145555
	0.872	-0.10655	-0.072	-0.10625	-0.11203	-0.09352		29.1976	0.01788	0.240645	0.172981	0.10175	0.153841
	0.88	-0.10432	-0.07794	-0.07893	-0.11692	-0.10998		29.3738	0.019727	0.250665	0.181633	0.108198	0.162342
	0.888	-0.08924	-0.07852	-0.10419	-0.12513	-0.10364		29.5499	0.02173	0.260845	0.190476	0.114907	0.171043
	0.896	-0.09971	-0.07021	-0.1074	-0.12325	-0.11626		29.726	0.023897	0.271174	0.199495	0.121874	0.179925
	0.904	-0.09988	-0.06702	-0.06231	-0.10257	-0.10912		29.9021	0.026236	0.281634	0.208677	0.129098	0.18897
	0.912	-0.09488	-0.07016	-0.086	-0.09787	-0.10381		30.0783	0.028756	0.292212	0.218004	0.136574	0.198157
	0.92	-0.11839	-0.05501	-0.06778	-0.10986	-0.11042		30.2544	0.031467	0.30289	0.22746	0.144297	0.207464
	0.928	-0.12602	-0.05676	-0.10264	-0.108	-0.0873		30.4305	0.034376	0.31365	0.237027	0.152261	0.216866
	0.936	-0.11108	-0.04436	-0.10366	-0.10269	-0.1127		30.6067	0.037492	0.324474	0.246684	0.160458	0.226338
	0.944	-0.11653	-0.05939	-0.09325	-0.12657	-0.09236		30.7828	0.040824	0.335343	0.256412	0.168879	0.235854
	0.952	-0.10461	-0.06292	-0.08676	-0.10059	-0.10216		30.9589	0.044378	0.346236	0.266188	0.177513	0.245386
	0.96	-0.11996	-0.0717	-0.07091	-0.10608	-0.10646		31.135	0.048162	0.357133	0.275992	0.186349	0.254904
	0.968	-0.11779	-0.06646	-0.07568	-0.09632	-0.11092		31.3111	0.052183	0.368012	0.2858	0.195373	0.26438
	0.976	-0.11872	-0.05101	-0.10247	-0.1102	-0.10458		31.4873	0.056446	0.37885	0.295588	0.204571	0.273783
	0.984	-0.11452	-0.05022	-0.08573	-0.11085	-0.10182		31.6634	0.060957	0.389625	0.305335	0.213927	0.283082
	0.992	-0.11569	-0.05897	-0.0704	-0.1078	-0.09803		31.8395	0.065721	0.400315	0.315015	0.223424	0.292247
	1	-0.08625	-0.04839	-0.0714	-0.11704	-0.08726		32.0157	0.070741	0.410895	0.324605	0.233043	0.301247
	1.008	-0.12416	-0.0517	-0.08361	-0.11179	-0.10144		32.1918	0.076019	0.421341	0.334082	0.242764	0.310052
	1.016	-0.12133	-0.04553	-0.07084	-0.09635	-0.08415		32.3679	0.081557	0.431631	0.343424	0.252567	0.318632
	1.024	-0.12623	-0.05396	-0.08424	-0.06877	-0.09332		32.544	0.087356	0.441738	0.352607	0.262428	0.326959
	1.032	-0.12129	-0.05557	-0.07439	-0.09822	-0.08985		32.7202	0.093414	0.451641	0.361612	0.272327	0.335006
	1.04	-0.11697	-0.05826	-0.092	-0.09779	-0.08344		32.8963	0.09973	0.461314	0.370417	0.282237	0.342746
	1.048	-0.12406	-0.03615	-0.04871	-0.09302	-0.09364		33.0724	0.106299	0.470734	0.379006	0.292136	0.350158
	1.056	-0.09366	-0.0325	-0.0834	-0.08683	-0.10314		33.2485	0.113117	0.479878	0.387361	0.301997	0.357218
	1.064	-0.11965	-0.04778	-0.06909	-0.07742	-0.08214		33.4247	0.120178	0.488723	0.395467	0.311794	0.363909
	1.072	-0.10364	-0.03663	-0.06472	-0.09792	-0.08269		33.6008	0.127473	0.497246	0.403314	0.321502	0.370214
	1.08	-0.11929	-0.05576	-0.05722	-0.09228	-0.07653		33.7769	0.134994	0.505427	0.410891	0.331094	0.376121
	1.088	-0.11306	-0.0259	-0.04359	-0.08486	-0.09449		33.953	0.142728	0.513245	0.418192	0.340544	0.381622
	1.096	-0.11958	-0.05218	-0.02742	-0.10518	-0.07353		34.1292	0.150665	0.52068	0.425214	0.349827	0.38671
	1.104	-0.11774	-0.03961	-0.05317	-0.08925	-0.07779		34.3053	0.15879	0.527715	0.431956	0.358917	0.391385
	1.112	-0.1142	-0.04682	-0.0767	-0.09121	-0.08412		34.4814	0.167088	0.534333	0.438423	0.367789	0.395649
	1.12	-0.12999	-0.02561	-0.07179	-0.07702	-0.06824		34.6575	0.175543	0.540517	0.444622	0.376421	0.399512
	1.128	-0.12522	-0.02699	-0.05343	-0.05939	-0.08645		34.8337	0.184136	0.546256	0.450564	0.38479	0.402985
	1.136	-0.11991	-0.04317	-0.03657	-0.08129	-0.07221		35.0098	0.19285	0.551536	0.456264	0.392877	0.406085
	1.144	-0.11228	-0.03749	-0.03656	-0.07566	-0.07897		35.1859	0.201664	0.55635	0.461742	0.400662	0.408834
	1.152	-0.10695	-0.03279	-0.04933	-0.08819	-0.07104		35.362	0.210558	0.560689	0.467022	0.408131	0.41126
	1.16	-0.11482	-0.01738	-0.0467	-0.09384	-0.07279		35.5382	0.21951	0.564549	0.472131	0.41527	0.413394
	1.168	-0.10584	-0.01063	-0.03593	-0.07367	-0.06262		35.7143	0.228499	0.567927	0.4771	0.422069	0.415273
	1.176	-0.12477	-0.04768	-0.0132	-0.05203	-0.05643		35.8904	0.237503	0.570825	0.481964	0.428522	0.416939
	1.184	-0.11861	-0.03728	-0.04651	-0.07367	-0.0522		36.0665	0.246499	0.573246	0.486761	0.434625	0.418438
	1.192	-0.12509	-0.03024	-0.02541	-0.06555	-0.07337		36.2427	0.255466	0.575197	0.491532	0.440379	0.419818
	1.2	-0.08015	-0.04173	-0.05009	-0.06526	-0.07044		36.4188	0.264382	0.576688	0.49632	0.445792	0.421134
	1.208	-0.10324	-0.01598	-0.02996	-0.06466	-0.0544		36.5949	0.273225	0.577734	0.50117	0.450871	0.422443
	1.216	-0.11855	-0.02548	-0.04507	-0.05815	-0.05969		36.771	0.281977	0.578352	0.506129	0.455634	0.423804
	1.224	-0.10517	-0.0221	-0.02594	-0.07577	-0.05067		36.9472	0.290618	0.578562	0.511243	0.4601	0.425279
	1.232	-0.11548	-0.02261	-0.01771	-0.06616	-0.05199		37.1233	0.299131	0.57839	0.516558	0.464295	0.426932
	1.24	-0.10949	-0.01207	-0.03095	-0.06565	-0.04947		37.2994	0.307499	0.577863	0.522119	0.468251	0.428826
	1.248	-0.1111	-0.02851	-0.02168	-0.05992	-0.04717		37.4755	0.315709	0.577014	0.527969	0.472004	0.431025
	1.256	-0.11273	-0.02196	-0.01753	-0.05323	-0.04727		37.6517	0.32375	0.575878	0.534146	0.475597	0.433592
	1.264	-0.09471	-0.01328	-0.00481	-0.0361	-0.03886		37.8278	0.331611	0.574493	0.540685	0.479077	0.436588
	1.272	-0.12003	-0.00951	-0.03911	-0.04971	-0.03991		38.0039	0.339286	0.572901	0.547616	0.482496	0.440072
	1.28	-0.13261	-0.01601	-0.03702	-0.05536	-0.03454		38.18	0.34677	0.571144	0.554962	0.485911	0.444097
	1.288	-0.11534	-0.0177	-0.01127	-0.04078	-0.03731		38.3562	0.354063	0.569268	0.562739	0.489383	0.448714
	1.296	-0.09155	-0.01997	-0.00428	-0.03496	-0.03405		38.5323	0.361166	0.567321	0.570954	0.492976	0.453965
	1.304	-0.08437	-0.01316	-0.01061	-0.03129	-0.05585		38.7084	0.368085	0.565349	0.579604	0.496757	0.459888
	1.312	-0.10232	-0.01643	-0.0134	-0.0451	-0.02061		38.8845	0.374825	0.5634	0.58868	0.500793	0.466512
	1.32	-0.11078	-0.02268	-0.01715	-0.03684	-0.01952		39.0607	0.3814	0.561519	0.598157	0.505154	0.473857
	1.328	-0.09558	-0.01746	-0.01121	-0.02481	-0.03699		39.2368	0.387823	0.55975	0.608004	0.509907	0.481934
	1.336	-0.08367	-0.00108	-0.01205	-0.03321	-0.0077		39.4129	0.39411	0.558135	0.618175	0.515117	0.490744
	1.344	-0.09877	-0.00145	-0.0151	-0.0485	-0.03034		39.589	0.400282	0.556711	0.628614	0.520846	0.500276
	1.352	-0.09978	-0.00888	-0.0188	-0.02787	-0.01821		39.7652	0.406361	0.555508	0.639254	0.527151	0.51051
	1.36	-0.10634	6.11e-05	0.000812	-0.02648	-0.04507		39.9413	0.412372	0.554552	0.650016	0.53408	0.521412
	1.368	-0.11005	-0.00527	-0.00672	-0.02424	-0.0284		40.1174	0.418342	0.553862	0.660812	0.541676	0.532938
	1.376	-0.10953	-0.01197	0.013368	-0.03073	-0.01978		40.2935	0.4243	0.553448	0.671542	0.549969	0.54503
	1.384	-0.08739	0.011955	0.033709	-0.0443	-0.01246		40.4697	0.430276	0.55331	0.682101	0.558978	0.557619
	1.392	-0.07489	-0.00997	0.014571	-0.02293	-0.01326		40.6458	0.436301	0.55344	0.692372	0.56871	0.570626
	1.4	-0.07767	-0.0021	-0.01044	-0.01163	-0.00386		40.8219	0.442407	0.553819	0.702236	0.579155	0.58396
	1.408	-0.08957	-0.00457	0.03096	-0.0358	-0.017		40.998	0.448626	0.554417	0.711566	0.59029	0.597519
	1.416	-0.08399	-0.00876	0.006508	-0.01898	-0.02455		41.1742	0.454988	0.555193	0.720236	0.602075	0.611194
	1.424	-0.07609	-0.01484	0.000254	0.000111	-0.02631		41.3503	0.461525	0.556099	0.728116	0.61445	0.624865
	1.432	-0.06323	0.0001	0.009011	-0.04213	-0.01871		41.5264	0.468263	0.557071	0.735079	0.627342	0.638408
	1.44	-0.07768	-0.00363	0.011452	-0.01341	-0.01246		41.7025	0.475231	0.55804	0.741001	0.640656	0.651692
	1.448	-0.06773	0.008145	0.020475	0.016621	0.001247		41.8787	0.482452	0.558927	0.745763	0.654283	0.664581
	1.456	-0.0672	-0.00755	0.011904	0.004563	-0.00292		42.0548	0.489946	0.559647	0.749253	0.668097	0.67694
	1.464	-0.0773	-0.01376	0.009449	-1.82e-06	-0.01255		42.2309	0.497729	0.560106	0.751371	0.681955	0.688629
	1.472	-0.09067	0.002437	0.021742	-0.00836	0.003895		42.407	0.505815	0.560209	0.752023	0.695704	0.699515
	1.48	-0.07592	0.019589	-0.00711	-0.00945	-0.0054		42.5832	0.51421	0.559858	0.751133	0.709175	0.709462
	1.488	-0.07272	0.004778	0.034623	-0.0111	-0.00131		42.7593	0.522917	0.558955	0.748636	0.722194	0.718344
	1.496	-0.07023	0.002925	0.024229	0.012055	-0.00322		42.9354	0.531932	0.557404	0.744484	0.734578	0.726038
	1.504	-0.06879	0.003191	0.019117	0.001469	0.006713		43.1116	0.541246	0.555112	0.738646	0.74614	0.732433
	1.512	-0.05664	0.000918	0.020701	-0.01509	0.007941		43.2877	0.550843	0.551994	0.731107	0.756694	0.737426
	1.52	-0.0778	0.020289	0.022737	0.013873	0.007512		43.4638	0.560701	0.547972	0.72187	0.766055	0.740925
	1.528	-0.07259	0.030362	0.022464	-0.00567	0.001818		43.6399	0.570793	0.54298	0.710956	0.774047	0.742853
	1.536	-0.06007	0.024966	0.007247	-0.02556	-0.00076		43.8161	0.581082	0.536964	0.698406	0.780501	0.743146
	1.544	-0.06019	0.032311	0.023836	0.024232	0.021454		43.9922	0.591528	0.52988	0.684273	0.78526	0.741755
	1.552	-0.05982	-0.00933	0.030111	0.002448	0.014045		44.1683	0.602084	0.521704	0.668632	0.788187	0.738647
	1.56	-0.05621	0.013047	0.020277	0.021729	0.004067		44.3444	0.612695	0.512425	0.65157	0.78916	0.733806
	1.568	-0.05034	0.012319	0.035536	-0.0013	0.010795		44.5206	0.623304	0.502047	0.633188	0.788079	0.727231
	1.576	-0.04507	0.022001	0.038649	0.019154	0.001342		44.6967	0.633845	0.490593	0.613601	0.784869	0.718939
	1.584	-0.05334	0.011183	0.015143	0.011352	0.010624		44.8728	0.644251	0.4781	0.592933	0.779479	0.708963
	1.592	-0.03788	0.03839	0.04139	0.003475	0.017471		45.0489	0.654449	0.464622	0.571319	0.771884	0.697351
	1.6	-0.04771	0.020812	0.011542	0.027759	0.03281		45.225	0.664363	0.450225	0.548898	0.762088	0.684166
	1.608	-0.053	-0.00056	0.041927	0.012231	0.020119		45.4012	0.673914	0.434991	0.525817	0.750121	0.669486
	1.616	-0.0555	0.012576	0.027755	0.006986	0.008863		45.5773	0.683024	0.41901	0.502222	0.736038	0.653402
	1.624	-0.04469	0.025222	0.031294	0.020524	0.011412		45.7534	0.69161	0.402387	0.478264	0.719924	0.636015
	1.632	-0.04208	0.020614	0.050343	0.032856	0.012605		45.9295	0.699593	0.385229	0.45409	0.701884	0.617439
	1.64	-0.04387	0.012791	0.012505	0.028835	0.030973		46.1057	0.706893	0.367651	0.429843	0.68205	0.597793
	1.648	-0.05023	0.016278	0.05326	0.019904	0.025555		46.2818	0.713432	0.349773	0.405665	0.660569	0.577206
	1.656	-0.05194	0.021943	0.057668	0.035781	0.014204		46.4579	0.719136	0.331714	0.381686	0.63761	0.555812
	1.664	-0.0579	0.012134	0.047521	0.026951	0.039211		46.6341	0.723933	0.313593	0.358034	0.613354	0.533745
	1.672	-0.03739	0.034094	0.044535	0.020284	0.015713		46.8102	0.727757	0.295525	0.334822	0.587993	0.511146
	1.68	-0.03993	0.006175	0.024234	0.020938	0.040331		46.9863	0.730547	0.277623	0.312159	0.561729	0.488152
	1.688	-0.04023	0.004835	0.054113	0.009848	0.01958		47.1624	0.732249	0.259989	0.290137	0.534766	0.464901
	1.696	-0.04265	0.014522	0.014152	0.027161	0.028534		47.3385	0.732816	0.242721	0.268841	0.507311	0.441526
	1.704	-0.03169	0.02485	0.041929	0.033217	0.016358		47.5147	0.732206	0.225908	0.248343	0.479567	0.418156
	1.712	-0.03517	0.009972	0.012786	0.004545	0.010522		47.6908	0.730389	0.209626	0.228702	0.451735	0.394915
	1.72	-0.01694	0.008205	0.034371	0.020766	0.037847		47.8669	0.727341	0.193942	0.209966	0.424004	0.371919
	1.728	-0.04019	0.01138	0.026357	0.046707	0.023743		48.0431	0.723047	0.178913	0.192172	0.396557	0.349278
	1.736	-0.01482	0.006383	0.054886	0.027769	0.026664		48.2192	0.717502	0.164584	0.175345	0.36956	0.327091
	1.744	-0.0305	0.005178	0.052704	0.019997	0.038309		48.3953	0.71071	0.15099	0.1595	0.343169	0.305448
	1.752	-0.03759	0.032687	0.023605	0.034688	0.034489		48.5714	0.702684	0.138153	0.144642	0.31752	0.284431
	1.76	-0.0267	0.017161	0.047227	0.036444	0.043164		48.7476	0.693446	0.126087	0.130766	0.292735	0.26411
	1.768	-0.01962	0.017364	0.057828	0.024991	0.038629		48.9237	0.683027	0.114796	0.11786	0.268918	0.244545
	1.776	-0.01109	0.030446	0.017748	0.036161	0.031558		49.0998	0.671467	0.104277	0.105904	0.246154	0.225786
	1.784	-0.03161	0.027348	0.033046	0.032282	0.048562		49.2759	0.658813	0.094517	0.094872	0.224511	0.207874
	1.792	-0.0209	0.014645	0.022057	0.031238	0.038939		49.452	0.64512	0.085497	0.084732	0.204041	0.190837
	1.8	-0.00839	0.032781	0.039638	0.040896	0.021614		49.6282	0.630451	0.077193	0.075448	0.184778	0.174698
	1.808	-0.01434	0.024112	0.056403	0.053779	0.043525		49.8043	0.614873	0.069577	0.06698	0.166741	0.159467
	1.816	-0.00117	0.01841	0.043087	0.055136	0.034814		49.9804	0.598462	0.062615	0.059285	0.149933	0.145149
	1.824	-0.01619	0.029649	0.030181	0.032639	0.041922		50.1566	0.581295	0.056272	0.052319	0.134347	0.131739
	1.832	-0.00047	0.04245	0.045175	0.040681	0.049933		50.3327	0.563455	0.050511	0.046036	0.119961	0.119226
	1.84	-0.00025	0.016839	0.024057	0.037342	0.049897		50.5088	0.545029	0.045293	0.040389	0.106744	0.107593
	1.848	0.001487	0.014448	0.032637	0.040358	0.02272		50.6849	0.526103	0.04058	0.035333	0.094657	0.096817
	1.856	-0.00243	0.008685	0.02586	0.05658	0.039544		50.8611	0.506768	0.036333	0.030821	0.083653	0.086871
	1.864	-0.02394	0.002055	0.038774	0.028155	0.035805		51.0372	0.487111	0.032514	0.026809	0.073679	0.077723
	1.872	0.012056	0.045515	0.023601	0.045838	0.047975		51.2133	0.467224	0.029086	0.023255	0.064679	0.069339
	1.88	-0.00567	0.038722	0.027681	0.047018	0.028246		51.3894	0.447194	0.026016	0.020116	0.056591	0.061682
	1.888	0.007516	0.029405	0.039639	0.034245	0.039735		51.5656	0.427107	0.023268	0.017354	0.049354	0.054714
	1.896	-0.00869	0.01638	0.018747	0.060017	0.046129		51.7417	0.407047	0.020813	0.014931	0.042906	0.048393
	1.904	-0.01567	0.030049	0.054313	0.049671	0.033276		51.9178	0.387093	0.018621	0.012813	0.037184	0.04268
	1.912	-0.01012	0.034283	0.04295	0.042055	0.04192		52.0939	0.367322	0.016664	0.010967	0.032127	0.037533
	1.92	-0.00105	0.023324	0.005021	0.034039	0.041548		52.2701	0.347806	0.014919	0.009364	0.027675	0.032912
	1.928	-0.00532	0.025815	0.0061	0.043582	0.025553		52.4462	0.328611	0.013362	0.007975	0.02377	0.028777
	1.936	0.008397	0.021648	0.013578	0.045094	0.025978		52.6223	0.3098	0.011974	0.006777	0.02036	0.025089
	1.944	0.004978	0.025293	0.00214	0.012521	0.024828		52.7984	0.291429	0.010735	0.005745	0.017391	0.021811
	1.952	-0.00305	0.006555	-0.00267	0.034007	0.03226		52.9746	0.273548	0.009629	0.00486	0.014817	0.018907
	1.96	0.019472	0.025378	0.035062	0.036423	0.025103		53.1507	0.256201	0.008642	0.004102	0.012592	0.016342
	1.968	-0.01083	0.023662	0.019141	0.042348	0.033626		53.3268	0.239429	0.007759	0.003456	0.010676	0.014085
	1.976	-0.01652	0.026702	0.031903	0.042633	0.030441		53.5029	0.223263	0.006969	0.002906	0.009032	0.012104
	1.984	0.00588	0.025573	0.010316	0.019526	0.028512		53.6791	0.20773	0.006261	0.002439	0.007625	0.010372
	1.992	0.00815	0.020887	0.022048	0.058719	0.032902		53.8552	0.192852	0.005627	0.002043	0.006424	0.008863
	2	0.031019	0.037389	-0.00065	0.027379	0.04356		54.0313	0.178645	0.005059	0.001709	0.005404	0.007551
	2.008	0.004337	0.01169	0.020253	0.051615	0.021965		54.2074	0.165119	0.004548	0.001428	0.004538	0.006415
	2.016	0.012773	0.031959	0.021632	0.033451	0.025652		54.3836	0.15228	0.004089	0.001191	0.003806	0.005434
	2.024	0.017589	0.014897	0.038729	0.041473	0.019757		54.5597	0.140129	0.003676	0.000992	0.003188	0.00459
	2.032	0.011958	0.021792	0.012463	0.065907	0.041088		54.7358	0.128661	0.003305	0.000826	0.002667	0.003866
	2.04	0.016399	0.015062	-0.01619	0.057207	0.032841		54.9119	0.117871	0.00297	0.000687	0.00223	0.003246
	2.048	0.00569	0.021147	0.025184	0.040801	0.029256		55.0881	0.107746	0.002669	0.000571	0.001864	0.002719
	2.056	0.023615	0.014191	0.025409	0.058208	0.024931		55.2642	0.098272	0.002397	0.000474	0.001557	0.00227
	2.064	-0.00243	0.012329	0.005412	0.042197	0.049271		55.4403	0.089432	0.002152	0.000393	0.0013	0.00189
	2.072	0.024841	0.024109	0.012353	0.044557	0.029689		55.6164	0.081206	0.001931	0.000326	0.001086	0.001569
	2.08	0.03071	0.016162	0.013239	0.027687	0.026802		55.7926	0.073573	0.001732	0.000271	0.000907	0.001299
	2.088	0.005794	0.029326	0.024555	0.037708	0.041996		55.9687	0.066509	0.001553	0.000225	0.000758	0.001072
	2.096	0.009168	0.008409	0.048137	0.025165	0.027238		56.1448	0.05999	0.001391	0.000186	0.000634	0.000882
	2.104	0.012952	0.005207	0.03434	0.051803	0.033462		56.3209	0.053989	0.001245	0.000155	0.000531	0.000724
	2.112	0.014807	0.003303	0.030883	0.042936	0.033029		56.4971	0.04848	0.001114	0.000128	0.000445	0.000593
	2.12	0.021334	0.005822	7.44e-05	0.023908	0.041081		56.6732	0.043437	0.000995	0.000107	0.000373	0.000483
	2.128	0.044678	-0.00637	0.02485	0.042658	0.019617		56.8493	0.038831	0.000889	8.86e-05	0.000313	0.000393
	2.136	0.018884	0.021848	0.023456	0.040583	0.031769		57.0254	0.034636	0.000793	7.36e-05	0.000263	0.000319
	2.144	0.009882	0.019797	0.011951	0.025872	0.037402		57.2016	0.030826	0.000707	6.12e-05	0.000221	0.000258
	2.152	0.031844	0.022904	0.003054	0.047824	0.018874		57.3777	0.027373	0.00063	5.09e-05	0.000186	0.000208
	2.16	0.035789	0.00185	0.01097	0.029164	0.036538		57.5538	0.024253	0.000561	4.24e-05	0.000157	0.000167
	2.168	0.045581	0.001268	0.009917	0.025812	0.014685		57.7299	0.021441	0.000499	3.53e-05	0.000132	0.000134
	2.176	0.017067	0.005987	0.011033	0.024928	0.032548		57.9061	0.018912	0.000443	2.95e-05	0.000112	0.000107
	2.184	0.011505	0.00176	-0.00215	0.053887	0.043282		58.0822	0.016645	0.000393	2.46e-05	9.44e-05	8.56e-05
	2.192	0.020666	-0.00778	-0.00181	0.030897	0.014447		58.2583	0.014616	0.000349	2.05e-05	7.98e-05	6.81e-05
	2.2	0.036067	0.000694	0.013594	0.033024	0.024157		58.4344	0.012806	0.000309	1.71e-05	6.75e-05	5.4e-05
	2.208	0.025422	0.016852	0.027289	0.02008	0.038184		58.6106	0.011195	0.000273	1.43e-05	5.72e-05	4.27e-05
	2.216	0.035151	0.021287	0.023811	0.036942	0.038908		58.7867	0.009765	0.000242	1.19e-05	4.84e-05	3.36e-05
	2.224	0.027546	0.006969	-0.00289	0.032675	0.032485		58.9628	0.008499	0.000213	9.97e-06	4.1e-05	2.64e-05
	2.232	0.042158	0.02119	-0.00479	0.035849	0.01584		59.1389	0.00738	0.000188	8.33e-06	3.47e-05	2.07e-05
	2.24	0.027324	-0.00206	0.025166	0.028371	0.017597		59.3151	0.006394	0.000166	6.96e-06	2.94e-05	1.62e-05
	2.248	0.028944	0.026594	0.008053	0.014355	0.01184		59.4912	0.005528	0.000146	5.81e-06	2.49e-05	1.26e-05
	2.256	0.016642	0.001974	0.029201	0.025166	0.02261		59.6673	0.004768	0.000129	4.86e-06	2.11e-05	9.81e-06
	2.264	0.021579	-0.00612	0.015411	0.020574	0.007335		59.8434	0.004103	0.000113	4.06e-06	1.78e-05	7.6e-06
	2.272	0.018666	-0.00983	-3.17e-05	0.038188	0.022858		60.0196	0.003524	9.94e-05	3.39e-06	1.51e-05	5.87e-06
	2.28	0.031896	-0.00231	-0.00543	0.020391	0.024553		60.1957	0.003019	8.72e-05	2.82e-06	1.28e-05	4.52e-06
	2.288	0.020687	0.004703	0.009371	0.023027	0.027157		60.3718	0.002581	7.64e-05	2.36e-06	1.08e-05	3.47e-06
	2.296	0.041394	-0.01188	-4.86e-05	0.027501	0.002465		60.548	0.002201	6.69e-05	1.96e-06	9.09e-06	2.66e-06
	2.304	0.01364	0.011571	-0.0176	0.03322	0.031882		60.7241	0.001873	5.85e-05	1.64e-06	7.67e-06	2.03e-06
	2.312	0.026588	-0.01079	-0.00707	0.033606	0.013341		60.9002	0.001591	5.12e-05	1.36e-06	6.46e-06	1.55e-06
	2.32	0.049157	-0.00512	-0.01797	0.010012	0.025138		61.0763	0.001348	4.47e-05	1.13e-06	5.44e-06	1.18e-06
	2.328	0.034314	-0.01675	0.014338	0.022639	0.006811		61.2524	0.001139	3.9e-05	9.41e-07	4.58e-06	8.91e-07
	2.336	0.027295	0.028627	0.002716	0.009963	0.027874		61.4286	0.000961	3.39e-05	7.81e-07	3.84e-06	6.72e-07
	2.344	0.037185	0.025944	0.017132	0.004002	0.020384		61.6047	0.000809	2.96e-05	6.48e-07	3.23e-06	5.06e-07
	2.352	0.023267	0.006782	-0.01256	0.015511	-0.0026		61.7808	0.000679	2.57e-05	5.37e-07	2.7e-06	3.8e-07
	2.36	0.036418	0.004624	-0.00507	0.020744	0.013221		61.9569	0.000569	2.23e-05	4.44e-07	2.27e-06	2.85e-07
	2.368	0.040829	-0.00223	0.014719	-0.00974	0.012342		62.1331	0.000476	1.94e-05	3.68e-07	1.89e-06	2.13e-07
	2.376	0.042974	-0.00378	0.001825	0.004821	0.00508		62.3092	0.000397	1.68e-05	3.04e-07	1.58e-06	1.58e-07
	2.384	0.034549	-0.00591	0.008092	0.010817	0.016248		62.4853	0.00033	1.46e-05	2.51e-07	1.32e-06	1.18e-07
	2.392	0.021424	0.008259	0.000352	0.014762	0.01368		62.6615	0.000274	1.26e-05	2.07e-07	1.1e-06	8.7e-08
	2.4	0.038859	0.008443	-0.01971	0.02267	0.011294		62.8376	0.000227	1.09e-05	1.7e-07	9.16e-07	6.42e-08
	2.408	0.019375	-0.00567	0.011579	0.020075	0.004624		63.0137	0.000188	9.41e-06	1.4e-07	7.62e-07	4.73e-08
	2.416	0.040281	0.000237	-0.01826	0.021005	0.005143		63.1898	0.000155	8.12e-06	1.15e-07	6.33e-07	3.47e-08
	2.424	0.026687	-0.00261	0.013064	0.02767	0.021582		63.3659	0.000127	7e-06	9.42e-08	5.25e-07	2.54e-08
	2.432	0.037873	-0.0095	0.016061	0.030849	0.004734		63.5421	0.000105	6.03e-06	7.72e-08	4.35e-07	1.86e-08
	2.44	0.026602	0.007432	-0.01499	0.015748	0.00997		63.7182	8.57e-05	5.18e-06	6.32e-08	3.59e-07	1.35e-08
	2.448	0.021363	-8.9e-05	-0.01088	-0.00903	0.014772		63.8943	7e-05	4.46e-06	5.17e-08	2.97e-07	9.82e-09
	2.456	0.034654	-0.02865	-0.0101	0.005763	0.012264		64.0704	5.71e-05	3.83e-06	4.22e-08	2.45e-07	7.11e-09
	2.464	0.020043	-0.00393	-0.01645	-0.00358	-0.00566		64.2466	4.65e-05	3.28e-06	3.44e-08	2.02e-07	5.13e-09
	2.472	0.016081	0.001706	-0.02503	0.024909	0.008976		64.4227	3.77e-05	2.81e-06	2.8e-08	1.66e-07	3.7e-09
	2.48	0.043554	-0.00214	-0.01111	-0.01222	-0.009		64.5988	3.06e-05	2.41e-06	2.28e-08	1.37e-07	2.66e-09
	2.488	0.035753	0.001628	0.006472	0.001542	0.007826		64.775	2.47e-05	2.06e-06	1.85e-08	1.12e-07	1.9e-09
	2.496	0.025473	-0.00898	-0.01508	0.005934	-0.018		64.9511	1.99e-05	1.76e-06	1.5e-08	9.2e-08	1.36e-09
	2.504	0.020245	-0.01186	0.008719	0.016292	0.003166		65.1272	1.6e-05	1.5e-06	1.22e-08	7.53e-08	9.7e-10
	2.512	0.018807	0.002345	0.006128	0.009547	0.014251		65.3033	1.29e-05	1.28e-06	9.84e-09	6.16e-08	6.89e-10
	2.52	0.053728	-0.01128	-0.00411	0.000735	0.006372		65.4794	1.03e-05	1.09e-06	7.96e-09	5.03e-08	4.89e-10
	2.528	0.031355	-0.01229	-0.01004	0.015045	0.005538		65.6556	8.24e-06	9.29e-07	6.42e-09	4.1e-08	3.46e-10
	2.536	0.045802	-0.00295	-0.01532	-0.0054	0.001273		65.8317	6.58e-06	7.9e-07	5.18e-09	3.34e-08	2.44e-10
	2.544	0.014927	0.003609	0.008208	0.009963	0.006477		66.0078	5.23e-06	6.71e-07	4.17e-09	2.72e-08	1.72e-10
	2.552	0.020408	-0.01168	-0.00204	0.001691	0.003169		66.1839	4.15e-06	5.69e-07	3.35e-09	2.21e-08	1.21e-10
	2.56	0.034475	-0.00585	-0.02379	0.003955	0.000342		66.3601	3.29e-06	4.83e-07	2.69e-09	1.79e-08	8.45e-11
	2.568	0.040685	-0.01324	9.72e-06	-0.00819	-0.00711		66.5362	2.6e-06	4.09e-07	2.16e-09	1.45e-08	5.91e-11
	2.576	0.037994	-0.00299	-0.0253	0.004078	-0.01459		66.7123	2.05e-06	3.46e-07	1.73e-09	1.18e-08	4.12e-11
	2.584	0.031996	-0.02202	0.015887	-0.0127	0.00115		66.8884	1.61e-06	2.92e-07	1.38e-09	9.51e-09	2.87e-11
	2.592	0.030287	0.000272	-0.03651	-0.01261	0.013378		67.0646	1.27e-06	2.47e-07	1.11e-09	7.68e-09	1.99e-11
	2.6	0.050165	-0.00941	0.001087	0.018755	-0.00434		67.2407	9.92e-07	2.08e-07	8.83e-10	6.19e-09	1.38e-11
	2.608	0.038024	-0.02154	-0.00662	0.002735	0.002922		67.4168	7.76e-07	1.75e-07	7.04e-10	4.99e-09	9.57e-12
	2.616	0.028085	0.001167	0.017429	-0.00624	-0.00924		67.593	6.05e-07	1.48e-07	5.6e-10	4.01e-09	6.61e-12
	2.624	0.022556	-0.01556	0.005526	-0.01711	-0.00811		67.7691	4.71e-07	1.24e-07	4.45e-10	3.22e-09	4.56e-12
	2.632	0.041617	0.000946	-0.02171	-0.01533	0.014997		67.9452	3.65e-07	1.04e-07	3.54e-10	2.58e-09	3.14e-12
	2.64	0.022064	-0.00637	0.018942	0.002672	-3.93e-05		68.1213	2.83e-07	8.77e-08	2.8e-10	2.07e-09	2.16e-12
	2.648	0.030618	-0.02243	0.032951	-0.00215	-0.00894		68.2975	2.19e-07	7.35e-08	2.22e-10	1.66e-09	1.48e-12
	2.656	0.022073	0.012439	-0.0244	-0.00566	-0.00234		68.4736	1.69e-07	6.16e-08	1.76e-10	1.32e-09	1.02e-12
	2.664	0.028647	0.00522	-0.03082	-0.01389	-0.00167		68.6497	1.3e-07	5.16e-08	1.39e-10	1.06e-09	6.98e-13
	2.672	0.038691	-0.00196	0.019336	0.012645	0.0053		68.8258	9.96e-08	4.31e-08	1.09e-10	8.42e-10	4.78e-13
	2.68	0.029703	-0.00151	0.013672	-0.01655	-0.00986		69.002	7.63e-08	3.6e-08	8.63e-11	6.7e-10	3.28e-13
	2.688	0.028012	0.004184	-0.00771	0.002344	-0.01758		69.1781	5.83e-08	3.01e-08	6.79e-11	5.33e-10	2.24e-13
	2.696	0.022234	-0.01483	0.001761	-0.01795	0.000285		69.3542	4.45e-08	2.51e-08	5.33e-11	4.23e-10	1.53e-13
	2.704	0.028017	-0.01415	-0.01145	0.003562	0.009092		69.5303	3.38e-08	2.09e-08	4.19e-11	3.35e-10	1.05e-13
	2.712	0.048403	-0.00477	-0.02014	0.010844	-0.00425		69.7065	2.57e-08	1.74e-08	3.28e-11	2.66e-10	7.18e-14
	2.72	0.020799	-0.0132	-0.03891	-0.01315	-0.01319		69.8826	1.94e-08	1.44e-08	2.57e-11	2.1e-10	4.91e-14
	2.728	0.014721	0.001959	-0.00966	-0.00218	-0.01891		70.0587	1.47e-08	1.2e-08	2.01e-11	1.66e-10	3.36e-14
	2.736	0.020417	0.012514	-0.01601	-0.01574	-0.00097		70.2348	1.11e-08	9.95e-09	1.57e-11	1.31e-10	2.3e-14
	2.744	0.026784	0.003939	-0.00762	-0.00465	0.004762		70.411	8.34e-09	8.25e-09	1.22e-11	1.03e-10	1.58e-14
	2.752	0.006552	0.013146	-0.04591	-0.02062	-0.00848		70.5871	6.26e-09	6.83e-09	9.53e-12	8.11e-11	1.08e-14
	2.76	0.041799	-0.00354	-0.01697	-0.01988	-0.00991		70.7632	4.69e-09	5.65e-09	7.42e-12	6.37e-11	7.45e-15
	2.768	0.003597	0.004889	-0.01022	-0.00403	-0.01073		70.9393	3.5e-09	4.67e-09	5.76e-12	5e-11	5.13e-15
	2.776	0.028118	0.013173	-0.00959	-0.00317	-0.01149		71.1155	2.61e-09	3.86e-09	4.47e-12	3.92e-11	3.53e-15
	2.784	0.015145	0.012143	0.001861	-0.0042	-0.00663		71.2916	1.94e-09	3.18e-09	3.47e-12	3.07e-11	2.44e-15
	2.792	0.005564	-0.00133	-0.0101	-0.00973	-0.00031		71.4677	1.44e-09	2.62e-09	2.68e-12	2.4e-11	1.68e-15
	2.8	0.023075	-0.00641	0.008241	-0.03801	-0.00736		71.6438	1.07e-09	2.16e-09	2.07e-12	1.87e-11	1.16e-15
	2.808	0.025771	-0.02044	-0.00333	0.001258	-0.01812		71.82	7.89e-10	1.77e-09	1.6e-12	1.46e-11	8.05e-16
	2.816	0.02711	-0.01032	0.005408	-0.01416	0.003445		71.9961	5.82e-10	1.46e-09	1.23e-12	1.14e-11	5.58e-16
	2.824	0.017374	0.001172	-0.04035	-0.02461	-0.00651		72.1722	4.28e-10	1.2e-09	9.5e-13	8.85e-12	3.88e-16
	2.832	0.02655	0.003215	-0.02289	-0.01895	-0.01294		72.3483	3.14e-10	9.81e-10	7.31e-13	6.87e-12	2.69e-16
	2.84	0.034234	-0.01705	-0.01506	-0.00833	-0.01651		72.5245	2.3e-10	8.03e-10	5.61e-13	5.33e-12	1.87e-16
	2.848	0.017288	-0.01528	-0.04452	-0.00848	-0.01858		72.7006	1.68e-10	6.57e-10	4.31e-13	4.13e-12	1.3e-16
	2.856	0.028683	-0.02086	-0.00513	-0.0209	-0.00549		72.8767	1.23e-10	5.37e-10	3.3e-13	3.2e-12	9.09e-17
	2.864	0.01526	-0.00927	-0.00307	-0.01048	-0.00649		73.0528	8.92e-11	4.39e-10	2.52e-13	2.47e-12	6.34e-17
	2.872	0.019861	0.007463	-0.01699	-0.01864	-0.00677		73.229	6.47e-11	3.58e-10	1.93e-13	1.91e-12	4.42e-17
	2.88	0.000129	-0.02384	-0.01361	-0.01686	-0.02428		73.4051	4.69e-11	2.92e-10	1.47e-13	1.47e-12	3.08e-17
	2.888	0.033213	-0.0068	-0.00778	-0.01084	-0.00615		73.5812	3.39e-11	2.38e-10	1.12e-13	1.13e-12	2.15e-17
	2.896	0.031964	-0.01037	-0.03538	-0.01291	-0.02597		73.7573	2.44e-11	1.93e-10	8.54e-14	8.7e-13	1.5e-17
	2.904	0.042643	-0.00756	-0.01352	-0.01493	-0.01371		73.9335	1.76e-11	1.57e-10	6.49e-14	6.68e-13	1.05e-17
	2.912	0.017783	0.003255	-0.02894	-0.0034	-0.01063		74.1096	1.26e-11	1.28e-10	4.93e-14	5.12e-13	7.31e-18
	2.92	0.016923	-0.01942	0.011477	-0.00337	-0.01813		74.2857	9.03e-12	1.04e-10	3.74e-14	3.92e-13	5.1e-18
	2.928	0.016895	0.005598	-0.0031	-0.01139	-0.01542		74.4618	6.45e-12	8.39e-11	2.83e-14	3e-13	3.56e-18
	2.936	0.001834	0.012388	-0.00034	-0.03525	-0.02123		74.638	4.6e-12	6.79e-11	2.14e-14	2.29e-13	2.48e-18
	2.944	0.027686	-0.00487	0.004878	-0.01736	-0.01201		74.8141	3.27e-12	5.49e-11	1.62e-14	1.75e-13	1.73e-18
	2.952	0.044969	-0.00658	0.003296	-0.02916	-0.00263		74.9902	2.32e-12	4.44e-11	1.22e-14	1.33e-13	1.2e-18
	2.96	0.028983	-0.01258	-0.02913	-0.03008	-0.01376		75.1663	1.64e-12	3.58e-11	9.2e-15	1.01e-13	8.34e-19
	2.968	0.027362	-0.00072	-0.03543	0.00957	-0.0168		75.3425	1.16e-12	2.89e-11	6.92e-15	7.7e-14	5.79e-19
	2.976	0.026681	-0.00182	-0.00107	-0.03719	-0.02589		75.5186	8.19e-13	2.33e-11	5.2e-15	5.85e-14	4.02e-19
	2.984	0.011478	-0.00984	-0.01669	-0.01229	-0.01649		75.6947	5.76e-13	1.87e-11	3.91e-15	4.43e-14	2.79e-19
	2.992	0.03283	0.004213	0.002178	-0.02282	-0.0453		75.8708	4.04e-13	1.51e-11	2.93e-15	3.35e-14	1.93e-19
	3	0.012991	-0.00177	-0.01754	-0.02251	0.004856		76.047	2.83e-13	1.21e-11	2.19e-15	2.54e-14	1.33e-19
	3.008	0.016418	-0.00137	-0.00841	-0.0281	-0.00966		76.2231	1.98e-13	9.71e-12	1.64e-15	1.91e-14	9.21e-20
	3.016	0.031437	-0.00192	0.011916	-0.01641	-0.00624		76.3992	1.38e-13	7.79e-12	1.22e-15	1.44e-14	6.35e-20
	3.024	0.019885	0.010155	-0.00998	-0.00645	-0.00371		76.5753	9.59e-14	6.24e-12	9.13e-16	1.09e-14	4.37e-20
	3.032	-2.55e-05	-0.00223	0.00145	-0.00216	-0.00551		76.7515	6.66e-14	4.99e-12	6.8e-16	8.18e-15	3.01e-20
	3.04	0.001397	0.001248	-0.00443	-0.02046	-0.00152		76.9276	4.61e-14	3.99e-12	5.06e-16	6.15e-15	2.07e-20
	3.048	0.034026	-0.01288	-0.00523	-0.02505	-0.01643		77.1037	3.19e-14	3.18e-12	3.76e-16	4.61e-15	1.42e-20
	3.056	0.026556	-0.00666	-0.03712	-0.01467	-0.00861		77.2798	2.2e-14	2.54e-12	2.79e-16	3.45e-15	9.7e-21
	3.064	0.035162	-0.00193	0.013234	-0.00764	-0.01501		77.456	1.51e-14	2.02e-12	2.07e-16	2.59e-15	6.63e-21
	3.072	0.020662	0.003641	-0.01395	-0.02825	-0.01151		77.6321	1.04e-14	1.61e-12	1.53e-16	1.93e-15	4.53e-21
	3.08	0.0098	0.011149	-0.00359	-0.01257	-0.02048		77.8082	7.1e-15	1.28e-12	1.13e-16	1.44e-15	3.09e-21
	3.088	-0.01374	-0.02036	0.016377	-0.00901	-0.02928		77.9843	4.85e-15	1.02e-12	8.36e-17	1.07e-15	2.1e-21
	3.096	0.005175	-0.01243	-0.01004	-7.69e-05	-0.01273		78.1605	3.3e-15	8.09e-13	6.16e-17	8e-16	1.43e-21
	3.104	0.020422	-0.006	-0.01765	-0.02078	-0.01326		78.3366	2.25e-15	6.41e-13	4.54e-17	5.95e-16	9.7e-22
	3.112	0.008902	-0.00221	0.008806	0.010489	-0.01724		78.5127	1.53e-15	5.08e-13	3.34e-17	4.42e-16	6.57e-22
	3.12	-0.01604	-0.01033	-0.01046	-0.01723	-0.00923		78.6889	1.03e-15	4.02e-13	2.45e-17	3.28e-16	4.45e-22
	3.128	0.025018	0.000863	-0.00188	-0.02715	0.002371		78.865	6.98e-16	3.18e-13	1.8e-17	2.43e-16	3.01e-22
	3.136	0.0059	-0.00468	-0.02746	-0.01449	-0.0283		79.0411	4.7e-16	2.51e-13	1.32e-17	1.79e-16	2.03e-22
	3.144	0.014888	-0.01164	0.006629	-0.02731	-0.0283		79.2172	3.16e-16	1.98e-13	9.64e-18	1.33e-16	1.37e-22
	3.152	0.004567	-0.00292	-0.00494	-0.01828	-0.0034		79.3933	2.12e-16	1.56e-13	7.04e-18	9.78e-17	9.18e-23
	3.16	0.009116	-0.01283	-0.0314	-0.02156	-0.02253		79.5695	1.42e-16	1.23e-13	5.14e-18	7.21e-17	6.16e-23
	3.168	0.004869	-0.00929	-0.02844	-0.0287	-0.01795		79.7456	9.49e-17	9.69e-14	3.75e-18	5.3e-17	4.13e-23
	3.176	-0.00337	-0.01918	-0.03014	-0.02031	-0.01467		79.9217	6.33e-17	7.62e-14	2.73e-18	3.9e-17	2.77e-23
	3.184	0.02245	0.008611	0.013013	-0.00135	-0.00971		80.0979	4.21e-17	5.98e-14	1.98e-18	2.86e-17	1.85e-23
	3.192	0.0136	-0.00359	-0.02729	-0.03087	-0.02376		80.274	2.79e-17	4.69e-14	1.44e-18	2.1e-17	1.23e-23
	3.2	0.0124	-0.00414	-0.01068	-0.02892	-0.0078		80.4501	1.85e-17	3.68e-14	1.04e-18	1.54e-17	8.21e-24
	3.208	-0.00493	-0.01366	-0.02232	-0.01123	-0.01147		80.6262	1.22e-17	2.88e-14	7.57e-19	1.12e-17	5.46e-24
	3.216	0.006771	-0.00279	0.008903	-0.01655	-0.0116		80.8024	8.05e-18	2.25e-14	5.47e-19	8.2e-18	3.63e-24
	3.224	0.026644	-0.00591	-0.01859	-0.00264	-0.02717		80.9785	5.3e-18	1.76e-14	3.95e-19	5.98e-18	2.4e-24
	3.232	0.020464	-0.00221	0.005383	-0.01346	-0.00408		81.1546	3.47e-18	1.37e-14	2.85e-19	4.36e-18	1.59e-24
	3.24	0.005314	-7.91e-05	-0.01058	-0.02434	-0.02071		81.3307	2.27e-18	1.07e-14	2.06e-19	3.17e-18	1.05e-24
	3.248	-0.00031	-0.0107	0.005153	-0.02329	-0.0213		81.5068	1.49e-18	8.36e-15	1.48e-19	2.3e-18	6.94e-25
	3.256	0.001224	-0.03006	0.00843	-0.00849	-0.01452		81.683	9.69e-19	6.5e-15	1.06e-19	1.67e-18	4.57e-25
	3.264	-0.01622	-0.00695	-0.01928	-0.02353	-0.01646		81.8591	6.3e-19	5.06e-15	7.63e-20	1.21e-18	3.01e-25
	3.272	-0.01425	-0.00349	-0.00846	-0.04512	-0.02643		82.0352	4.09e-19	3.93e-15	5.47e-20	8.76e-19	1.98e-25
	3.28	-0.0125	0.012583	-0.01747	-0.02013	-0.01085		82.2114	2.65e-19	3.05e-15	3.92e-20	6.33e-19	1.29e-25
	3.288	0.001035	-0.01355	-0.00105	-0.01745	0.011498		82.3875	1.71e-19	2.37e-15	2.8e-20	4.57e-19	8.48e-26
	3.296	0.017217	0.013353	0.016932	-0.0269	-0.02119		82.5636	1.1e-19	1.83e-15	2e-20	3.29e-19	5.54e-26
	3.304	-0.00198	-0.00535	0.000524	-0.03201	0.002796		82.7397	7.08e-20	1.42e-15	1.43e-20	2.37e-19	3.62e-26
	3.312	0.030913	-0.01026	0.00117	-0.02202	-0.01263		82.9158	4.55e-20	1.1e-15	1.02e-20	1.71e-19	2.36e-26
	3.32	0.021591	0.004481	-0.01231	-0.02387	-0.00545		83.092	2.91e-20	8.47e-16	7.24e-21	1.22e-19	1.53e-26
	3.328	-0.00321	0.001107	-0.01073	-0.02046	-0.01138		83.2681	1.86e-20	6.53e-16	5.14e-21	8.78e-20	9.95e-27
	3.336	-0.00533	-0.00115	0.006338	-0.01004	-0.0291		83.4442	1.18e-20	5.04e-16	3.65e-21	6.29e-20	6.45e-27
	3.344	0.003256	0.005782	-0.00815	-0.01359	-0.00569		83.6204	7.54e-21	3.88e-16	2.59e-21	4.5e-20	4.18e-27
	3.352	0.001088	-0.01177	0.013699	-0.01131	0.001345		83.7965	4.78e-21	2.98e-16	1.83e-21	3.21e-20	2.7e-27
	3.36	-0.00078	-0.00322	0.004019	-0.01802	-0.00484		83.9726	3.03e-21	2.29e-16	1.29e-21	2.29e-20	1.74e-27
	3.368	-0.01076	0.007714	-0.00185	-0.0127	-0.02199		84.1487	1.91e-21	1.76e-16	9.14e-22	1.63e-20	1.12e-27
	3.376	-0.01213	-0.0094	0.002927	0.011305	-0.02239		84.3248	1.21e-21	1.35e-16	6.44e-22	1.16e-20	7.22e-28
	3.384	-0.00463	0.00688	-0.00971	-0.00043	-0.01832		84.501	7.58e-22	1.03e-16	4.54e-22	8.27e-21	4.64e-28
	3.392	-0.00074	-0.01718	-0.00786	-0.01543	-0.01811		84.6771	4.76e-22	7.92e-17	3.19e-22	5.87e-21	2.98e-28
	3.4	0.001848	-0.01946	0.010994	0.004035	-0.02042		84.8532	2.98e-22	6.06e-17	2.24e-22	4.16e-21	1.9e-28
	3.408	-0.00724	-0.00382	-0.00725	0.002894	-0.00708		85.0294	1.86e-22	4.63e-17	1.57e-22	2.95e-21	1.22e-28
	3.416	0.000294	0.000998	6.35e-05	-0.00889	-0.00469		85.2055	1.16e-22	3.53e-17	1.1e-22	2.08e-21	7.77e-29
	3.424	0.000951	-0.00921	-0.0116	-0.01784	-0.01034		85.3816	7.21e-23	2.69e-17	7.71e-23	1.47e-21	4.95e-29
	3.432	0.000384	0.012113	-0.00213	-0.00131	0.003564		85.5577	4.47e-23	2.05e-17	5.39e-23	1.04e-21	3.15e-29
	3.44	-0.01479	0.005888	-0.01656	-0.03139	-0.01282		85.7339	2.77e-23	1.56e-17	3.76e-23	7.31e-22	2e-29
	3.448	0.009607	-0.01016	-0.00273	-0.01627	-0.02011		85.91	1.71e-23	1.19e-17	2.62e-23	5.14e-22	1.27e-29
	3.456	-0.01245	-0.00365	0.007465	-0.0339	-0.02052		86.0861	1.05e-23	9.02e-18	1.83e-23	3.61e-22	8.04e-30
	3.464	0.011979	0.000333	0.025043	-0.01321	0.007216		86.2622	6.48e-24	6.85e-18	1.27e-23	2.53e-22	5.08e-30
	3.472	0.000692	-0.0152	0.001466	-0.03999	-0.01571		86.4384	3.98e-24	5.19e-18	8.81e-24	1.78e-22	3.21e-30
	3.48	0.011839	-0.00823	0.023728	0.008099	-0.01135		86.6145	2.44e-24	3.93e-18	6.11e-24	1.24e-22	2.02e-30
	3.488	0.003024	-0.00646	0.013765	-0.01665	-0.01025		86.7906	1.49e-24	2.97e-18	4.23e-24	8.69e-23	1.27e-30
	3.496	-0.0045	0.000938	-0.02616	-0.02018	-0.01143		86.9667	9.07e-25	2.25e-18	2.93e-24	6.06e-23	7.99e-31
	3.504	-0.00082	0.004568	0.006289	0.000788	0.002987		87.1429	5.51e-25	1.7e-18	2.02e-24	4.23e-23	5.01e-31
	3.512	-0.00848	0.012626	-0.01134	-0.00601	-0.00171		87.319	3.35e-25	1.28e-18	1.4e-24	2.94e-23	3.14e-31
	3.52	0.010283	-0.00824	-0.00663	-0.01385	-0.01716		87.4951	2.03e-25	9.65e-19	9.62e-25	2.05e-23	1.96e-31
	3.528	-0.0212	0.000594	-0.00957	-0.00928	0.008997		87.6712	1.22e-25	7.27e-19	6.62e-25	1.42e-23	1.22e-31
	3.536	-0.01697	-0.00791	0.027075	-0.02	-0.00575		87.8474	7.38e-26	5.47e-19	4.55e-25	9.86e-24	7.63e-32
	3.544	-0.00045	-0.00999	0.013832	-0.00734	-0.01624		88.0235	4.44e-26	4.11e-19	3.12e-25	6.83e-24	4.75e-32
	3.552	-0.00016	0.005703	0.018088	-0.01113	-0.01866		88.1996	2.66e-26	3.08e-19	2.14e-25	4.73e-24	2.95e-32
	3.56	-0.00812	-0.00572	0.010795	0.010723	-0.00189		88.3757	1.59e-26	2.31e-19	1.47e-25	3.26e-24	1.83e-32
	3.568	-0.00172	-0.01912	0.017254	0.001075	0.009423		88.5519	9.53e-27	1.73e-19	1e-25	2.25e-24	1.13e-32
	3.576	-0.00686	-0.00117	-0.0076	0.00897	-0.02175		88.728	5.68e-27	1.3e-19	6.85e-26	1.55e-24	7e-33
	3.584	0.004101	0.011529	-0.00843	0.000541	-0.01444		88.9041	3.38e-27	9.7e-20	4.67e-26	1.07e-24	4.32e-33
	3.592	-0.01027	-0.0035	-0.01644	-0.01842	-0.01699		89.0802	2.01e-27	7.24e-20	3.18e-26	7.34e-25	2.67e-33
	3.6	-0.02193	-0.0014	7.29e-05	0.005969	-0.01025		89.2564	1.19e-27	5.41e-20	2.17e-26	5.04e-25	1.64e-33
	3.608	-0.00964	0.017607	0.014215	0.001428	-0.00948		89.4325	7.02e-28	4.03e-20	1.47e-26	3.46e-25	1.01e-33
	3.616	0.002251	0.004611	-0.00266	-0.02111	-0.00222		89.6086	4.14e-28	3e-20	9.99e-27	2.37e-25	6.18e-34
	3.624	-0.02515	0.006778	0.005363	-0.0059	0.004994		89.7847	2.43e-28	2.23e-20	6.77e-27	1.62e-25	3.79e-34
	3.632	-0.01207	0.003753	0.003504	-0.00497	0.019313		89.9609	1.43e-28	1.66e-20	4.58e-27	1.11e-25	2.31e-34
	3.64	-0.01505	-0.00236	0.005382	-0.00228	-0.01045		90.137	8.37e-29	1.23e-20	3.1e-27	7.54e-26	1.41e-34
	3.648	-0.01973	-0.01076	0.014421	0.003714	-0.00048		90.3131	4.89e-29	9.15e-21	2.09e-27	5.14e-26	8.61e-35
	3.656	-0.01489	0.020124	5.59e-05	0.006472	0.008668		90.4892	2.85e-29	6.78e-21	1.41e-27	3.49e-26	5.24e-35
	3.664	-0.03036	-0.00664	-0.00807	-0.01423	-0.00821		90.6654	1.66e-29	5.02e-21	9.5e-28	2.37e-26	3.19e-35
	3.672	-0.02666	0.011081	0.005508	-0.0119	0.012168		90.8415	9.64e-30	3.71e-21	6.39e-28	1.61e-26	1.93e-35
	3.68	-0.01702	0.002622	-0.00841	0.00045	-0.01172		91.0176	5.59e-30	2.75e-21	4.29e-28	1.09e-26	1.17e-35
	3.688	-0.02583	0.00532	-0.00734	0.017004	0.010979		91.1937	3.23e-30	2.03e-21	2.88e-28	7.39e-27	7.08e-36
	3.696	-0.01209	0.002892	-0.01036	-0.00692	0.007219		91.3699	1.86e-30	1.49e-21	1.93e-28	4.99e-27	4.27e-36
	3.704	-0.00027	0.003631	-0.00965	-0.00609	0.002102		91.546	1.07e-30	1.1e-21	1.29e-28	3.37e-27	2.58e-36
	3.712	-0.03349	-0.00866	-0.00761	0.002791	0.002995		91.7221	6.17e-31	8.11e-22	8.63e-29	2.27e-27	1.55e-36
	3.72	-0.02253	-0.01134	-0.0053	0.011769	0.005003		91.8982	3.54e-31	5.96e-22	5.76e-29	1.53e-27	9.31e-37
	3.728	0.000785	-0.00735	0.002421	0.008571	-0.00971		92.0744	2.02e-31	4.38e-22	3.84e-29	1.03e-27	5.59e-37
	3.736	-0.02579	0.00508	-0.0306	-0.01159	0.009983		92.2505	1.16e-31	3.22e-22	2.56e-29	6.91e-28	3.35e-37
	3.744	-0.02027	0.011919	-0.01863	-0.01149	-0.00036		92.4266	6.58e-32	2.36e-22	1.7e-29	4.64e-28	2e-37
	3.752	-0.00621	0.008604	-0.01243	0.0039	-0.0052		92.6027	3.74e-32	1.73e-22	1.13e-29	3.11e-28	1.2e-37
	3.76	-0.01105	-0.01353	0.017293	-0.00424	-0.0116		92.7789	2.12e-32	1.26e-22	7.49e-30	2.08e-28	7.13e-38
	3.768	-0.01007	-0.00165	-0.00322	0.010248	0.018101		92.955	1.2e-32	9.24e-23	4.96e-30	1.39e-28	4.24e-38
	3.776	-0.00184	-0.00363	-0.00838	0.01051	-0.00048		93.1311	6.8e-33	6.75e-23	3.28e-30	9.27e-29	2.52e-38
	3.784	-0.00508	0.008161	-0.00137	0.001303	0.000965		93.3072	3.83e-33	4.92e-23	2.17e-30	6.18e-29	1.5e-38
	3.792	-0.03113	-0.00357	-0.0029	-0.00221	0.007535		93.4834	2.16e-33	3.59e-23	1.43e-30	4.11e-29	8.86e-39
	3.8	-0.03284	0.023613	-0.01013	0.014425	-0.00555		93.6595	1.21e-33	2.61e-23	9.43e-31	2.73e-29	5.24e-39
	3.808	-0.00622	0.003308	-0.0148	-0.00833	-0.01169		93.8356	6.8e-34	1.9e-23	6.21e-31	1.81e-29	3.09e-39
	3.816	0.008744	-0.01102	-0.0099	0.005595	-0.00036		94.0117	3.81e-34	1.38e-23	4.08e-31	1.2e-29	1.82e-39
	3.824	-0.00691	0.007135	0.005454	-0.0189	0.005541		94.1879	2.13e-34	1e-23	2.68e-31	7.97e-30	1.07e-39
	3.832	-0.02368	0.013454	0.013147	0.003411	0.004374		94.364	1.19e-34	7.28e-24	1.76e-31	5.27e-30	6.31e-40
	3.84	0.017775	0.007873	0.005506	-0.00922	0.005807		94.5401	6.6e-35	5.27e-24	1.15e-31	3.48e-30	3.7e-40
	3.848	-0.01141	0.010115	-0.00057	-0.00407	0.010146		94.7162	3.67e-35	3.82e-24	7.52e-32	2.3e-30	2.17e-40
	3.856	-0.01291	0.00562	-0.00829	0.001643	-0.0121		94.8924	2.03e-35	2.76e-24	4.91e-32	1.51e-30	1.27e-40
	3.864	-0.00582	0.000755	0.00143	-0.0066	0.023631		95.0685	1.13e-35	2e-24	3.21e-32	9.95e-31	7.41e-41
	3.872	-0.00256	0.004975	-0.00518	0.002737	0.005731		95.2446	6.23e-36	1.44e-24	2.09e-32	6.54e-31	4.32e-41
	3.88	-0.01403	0.005197	0.024805	-0.00307	-0.01934		95.4207	3.44e-36	1.04e-24	1.36e-32	4.29e-31	2.51e-41
	3.888	-0.01911	0.011296	-0.01303	0.001941	0.006554		95.5969	1.9e-36	7.48e-25	8.83e-33	2.81e-31	1.46e-41
	3.896	-0.01879	0.001663	0.03265	0.006031	-0.01862		95.773	1.04e-36	5.38e-25	5.73e-33	1.84e-31	8.48e-42
	3.904	-0.01522	0.031061	0.010978	-0.01121	-0.01071		95.9491	5.74e-37	3.87e-25	3.71e-33	1.2e-31	4.91e-42
	3.912	-0.01205	-0.00742	-0.00553	0.010872	0.007727		96.1252	3.15e-37	2.78e-25	2.4e-33	7.85e-32	2.84e-42
	3.92	-0.00865	0.013807	-0.0109	0.002955	0.002709		96.3014	1.73e-37	2e-25	1.55e-33	5.12e-32	1.64e-42
	3.928	-0.00481	0.012537	0.015367	-0.01219	0.01415		96.4775	9.45e-38	1.43e-25	1e-33	3.34e-32	9.47e-43
	3.936	-0.02537	-0.00483	0.009142	-0.00744	0.015529		96.6536	5.17e-38	1.02e-25	6.47e-34	2.17e-32	5.45e-43
	3.944	-0.01786	-0.01932	-0.0008	0.008273	-0.01474		96.8298	2.82e-38	7.33e-26	4.17e-34	1.41e-32	3.13e-43
	3.952	-0.00124	-0.00936	0.018242	0.034721	0.003717		97.0059	1.54e-38	5.24e-26	2.68e-34	9.14e-33	1.8e-43
	3.96	-0.01734	-0.00907	0.022642	0.001068	-0.00913		97.182	8.41e-39	3.74e-26	1.72e-34	5.92e-33	1.03e-43
	3.968	-0.02064	0.014801	-0.00338	0.003693	-0.00023		97.3581	4.58e-39	2.67e-26	1.11e-34	3.83e-33	5.89e-44
	3.976	-0.02854	0.012469	-0.02239	-0.0167	9.83e-05		97.5343	2.5e-39	1.9e-26	7.08e-35	2.48e-33	3.37e-44
	3.984	-0.02144	0.011145	0.021256	-0.00347	0.003059		97.7104	1.36e-39	1.35e-26	4.53e-35	1.6e-33	1.92e-44
	3.992	-0.00937	0.007585	0.028584	0.035296	0.016775		97.8865	7.39e-40	9.63e-27	2.9e-35	1.03e-33	1.09e-44
	4	-0.01661	-0.00175	0.003085	0.01355	0.011394		98.0626	4.02e-40	6.84e-27	1.85e-35	6.63e-34	6.21e-45
	4.008	-0.03459	0.000393	0.000459	-0.01827	0.011094		98.2387	2.18e-40	4.86e-27	1.18e-35	4.26e-34	3.52e-45
	4.016	-0.0263	-0.00015	-0.00795	0.002532	0.00583		98.4149	1.19e-40	3.45e-27	7.51e-36	2.74e-34	2e-45
	4.024	-0.02964	0.027146	0.000476	-0.00391	-0.00016		98.591	6.45e-41	2.44e-27	4.77e-36	1.75e-34	1.13e-45
	4.032	-0.00494	-0.00501	-0.00049	-0.00198	0.003909		98.7671	3.5e-41	1.73e-27	3.03e-36	1.12e-34	6.38e-46
	4.04	-0.02341	0.008073	-0.00339	0.008146	-0.00338		98.9433	1.9e-41	1.22e-27	1.92e-36	7.18e-35	3.6e-46
	4.048	0.004739	-0.01755	0.011809	0.009174	-0.00504		99.1194	1.03e-41	8.63e-28	1.22e-36	4.59e-35	2.03e-46
	4.056	-0.00962	-0.00142	-0.00705	-0.00294	0.003616		99.2955	5.62e-42	6.09e-28	7.71e-37	2.93e-35	1.14e-46
	4.064	0.006196	0.004221	0.019947	-0.00073	-0.01835		99.4716	3.05e-42	4.29e-28	4.87e-37	1.86e-35	6.4e-47
	4.072	0.005522	0.012529	-0.03385	-0.01262	-2.94e-05		99.6478	1.66e-42	3.02e-28	3.07e-37	1.19e-35	3.58e-47
	4.08	-0.01054	0.013534	-0.00315	-0.00902	-0.01751		99.8239	9.03e-43	2.13e-28	1.94e-37	7.54e-36	2.01e-47
	4.088	-0.02345	0.005942	-0.00434	0.012726	0.005364		100	4.91e-43	1.5e-28	1.22e-37	4.79e-36	1.12e-47
	4.096	-0.00619	-0.00924	0.021229	0.001047	0.002688
	4.104	0.002302	0.006041	-0.00426	0.012337	-0.00857
	4.112	-0.01678	-0.0091	-0.01391	0.011492	0.009272
	4.12	-0.02803	-0.00807	-0.00514	0.006527	0.009345
	4.128	-0.03994	-0.00019	0.013882	0.025973	0.002634
	4.136	-0.02559	-0.0044	-0.00501	0.014949	-0.01315
	4.144	-0.005	-0.00443	-0.00318	-0.01796	-0.0029
	4.152	-0.00752	-0.01664	0.013813	0.014366	0.012843
	4.16	0.013554	0.006335	-0.00522	0.011323	0.014864
	4.168	0.009349	0.010419	-0.0042	0.027128	-0.0139
	4.176	-0.01424	0.007437	-0.03045	0.00872	-0.00249
	4.184	-0.01567	0.007149	0.002276	1.89e-07	-0.00447
	4.192	-0.00988	-0.01282	-0.0255	0.016117	-0.00573
	4.2	-0.00594	-0.00407	0.009869	0.01429	-0.01474
	4.208	0.005769	0.001477	0.006976	0.006205	-0.00241
	4.216	-0.00712	-0.00409	0.013929	-0.00567	0.015224
	4.224	-0.00206	-0.01139	-0.00098	-0.01034	0.009342
	4.232	0.011952	-0.00726	0.024706	-0.0139	0.001357
	4.24	-0.0149	-0.01636	-0.00746	-0.00152	-0.00745
	4.248	-0.00951	0.010694	-0.02048	-0.00743	0.009449
	4.256	-0.01437	0.003111	-0.01483	0.007808	0.009777
	4.264	-0.01531	0.001233	0.014285	0.013772	0.019147
	4.272	-0.02308	-0.00454	0.008079	-0.01282	-0.00751
	4.28	0.016038	0.007419	-0.00526	-0.00949	0.002819
	4.288	-0.02326	-0.0093	0.008015	0.001425	0.018169
	4.296	-0.01198	-0.0147	0.01392	-0.008	-0.0053
	4.304	-0.00993	-0.00924	-0.00247	-0.00203	0.003923
	4.312	-0.02005	0.018237	0.003907	-0.02047	0.002034
	4.32	-0.00436	-0.00741	-0.0036	0.010054	0.020778
	4.328	0.007074	-0.00369	-0.02882	0.021949	0.010592
	4.336	-0.00934	-0.00181	-0.01472	-0.00329	0.005961
	4.344	-0.0141	0.001882	-0.01756	0.005246	0.019963
	4.352	-0.02592	-0.01282	-0.01132	-0.00257	0.018208
	4.36	-0.01141	-0.01356	0.009985	0.010212	-0.00705
	4.368	-0.01159	0.025889	0.018942	0.001306	0.009698
	4.376	-0.01129	-0.00295	-0.00181	0.00604	-0.01407
	4.384	-0.01813	-0.00707	0.002536	0.005657	0.006962
	4.392	0.009435	-0.0033	0.001727	-0.00294	0.00617
	4.4	0.002789	0.007295	0.000678	-0.00694	-0.00207
	4.408	-0.00245	-0.00334	0.013267	0.012529	0.014504
	4.416	-0.00536	-0.00722	-0.01167	0.001779	-0.00141
	4.424	-0.00827	0.005635	0.002377	0.0148	-0.00377
	4.432	-0.02717	-0.00143	-0.02855	-0.00311	0.004705
	4.44	-0.00928	0.007519	0.004898	-0.02012	0.012196
	4.448	-0.02009	0.013936	0.010547	0.005878	-0.00349
	4.456	-0.00615	-0.00484	0.002778	-0.02092	-0.00794
	4.464	-0.0185	0.006933	-0.01827	0.013017	-0.00208
	4.472	0.004158	0.00267	-0.00133	0.015489	-0.00612
	4.48	-0.00699	0.004316	-0.01812	0.022431	0.006144
	4.488	-0.01746	-0.00964	0.002411	0.011659	0.002075
	4.496	0.019115	0.013899	-0.01008	0.000227	-0.00611
	4.504	0.017296	-0.01019	0.020247	0.022049	0.015077
	4.512	-0.01256	0.008461	0.002038	0.00502	0.017919
	4.52	-0.00997	-0.01402	0.024365	0.018543	-0.01017
	4.528	-0.00279	0.003478	-0.02479	-0.01127	-0.00654
	4.536	0.000236	-0.00025	0.013252	0.016425	0.004853
	4.544	-0.02243	-0.00165	0.010528	0.003056	0.011192
	4.552	-0.01808	-0.0016	-0.00086	-0.02533	0.00156
	4.56	-0.01629	0.011109	-0.0161	0.010482	-0.00725
	4.568	-0.00039	-0.00421	-0.01707	0.028373	0.015323
	4.576	0.003315	-0.01592	0.010153	-0.00203	-0.01497
	4.584	0.005297	0.013123	0.014548	0.000197	0.001264
	4.592	-0.00857	0.00158	0.004835	0.020539	0.00822
	4.6	-0.00629	0.008204	0.018893	0.004128	0.003002
	4.608	-0.00139	0.00768	0.016562	-0.01339	0.010973
	4.616	0.020894	-0.0091	-0.00132	-0.00289	0.007042
	4.624	-0.00523	0.001483	-0.00121	-0.0099	0.000586
	4.632	-0.01906	0.016067	-0.01389	0.014507	0.018804
	4.64	-0.01219	0.017729	0.021832	0.002203	0.012004
	4.648	-0.00387	-0.00226	-0.02288	0.009949	-0.01019
	4.656	-0.02077	0.007174	0.001247	0.018156	-0.00565
	4.664	0.0118	0.004505	0.022164	0.02545	-0.00929
	4.672	-0.00195	-0.0056	-0.00589	-0.00531	0.00786
	4.68	0.006394	-0.00096	-0.01719	-0.00303	-0.01415
	4.688	0.016263	-0.00132	-0.0138	0.002122	0.005631
	4.696	-0.00596	-0.01177	-0.00587	-0.01434	-0.00024
	4.704	-0.01174	-0.01493	-0.007	-0.00391	-0.01435
	4.712	0.008268	0.006575	0.006988	0.011763	0.013648
	4.72	-0.01495	-0.00455	0.010382	0.000839	0.011474
	4.728	-0.02388	0.015974	-0.00555	0.016589	-0.0007
	4.736	-0.00961	0.006939	-0.02051	-0.01046	0.00975
	4.744	-0.00258	-0.00937	0.001213	0.009536	-0.0073
	4.752	0.008318	0.005934	0.029856	0.003396	0.005717
	4.76	-0.00511	0.008123	-0.00167	-0.01325	0.005011
	4.768	-0.00281	-0.00474	0.010269	0.006328	0.013786
	4.776	-0.00307	0.006351	0.011234	-0.00656	0.008052
	4.784	-0.00617	0.013538	-0.00874	0.005539	-0.00394
	4.792	-0.00186	0.001853	0.016629	-0.00369	-8.43e-05
	4.8	0.031983	-0.00479	0.012193	0.009018	0.017548
	4.808	-0.00484	-0.00956	0.000693	-0.01138	-0.00859
	4.816	0.00545	-0.00596	-0.04151	0.000395	-0.006
	4.824	-0.00064	0.002147	-0.02097	-0.01722	0.000414
	4.832	0.017609	0.003615	0.019312	0.010759	-0.0153
	4.84	0.000176	-0.00124	-0.00441	-0.01174	0.014909
	4.848	0.002312	-0.01091	0.00387	0.013715	0.019875
	4.856	-0.00821	-0.00497	-0.01394	0.004458	-0.00544
	4.864	-0.0083	-0.02333	-0.01528	0.014661	-0.00572
	4.872	0.010035	0.00531	0.01688	-0.00636	-0.00173
	4.88	-0.00072	-0.0122	0.036238	0.02631	0.007274
	4.888	0.007761	-0.0152	0.012551	-0.0155	0.011644
	4.896	-0.00116	-0.00782	0.019318	-0.00018	-0.00129
	4.904	-0.00453	0.001476	-0.01445	0.005644	0.004462
	4.912	9.06e-05	0.006359	0.002112	-0.0021	0.013412
	4.92	-0.01093	0.003085	-0.00229	0.027047	0.006189
	4.928	-0.00484	0.004652	0.001803	0.032474	-0.00163
	4.936	0.00125	0.005856	0.006838	0.005846	0.010435
	4.944	0.030382	0.007907	0.025764	0.010224	0.005688
	4.952	-0.01445	-0.01003	0.005187	0.007371	0.02146
	4.96	-0.02087	0.005009	-0.01595	0.02731	0.021471
	4.968	0.017223	0.002824	-0.00157	0.028708	0.011207
	4.976	-0.01111	-0.01645	0.006139	-0.00551	0.007495
	4.984	0.003512	0.010463	-0.00251	0.007298	0.013874
	4.992	0.005186	-0.00307	-0.01007	0.011896	0.02246
	5	0.012232	-0.00046	0.010276	0.003823	0.000615
	5.008	0.000123	0.024864	0.003177	0.009135	0.010689
	5.016	-0.0273	-0.01983	-0.00109	0.021162	-0.00052
	5.024	0.004032	0.005589	0.003668	-0.00107	0.000281
	5.032	0.003988	-0.00535	-0.01072	0.017199	0.006593
	5.04	0.030484	-0.01284	-0.0044	0.027526	0.014224
	5.048	0.003285	-0.00298	0.042829	0.005383	0.006542
	5.056	0.021988	0.002384	0.008519	0.004872	0.019448
	5.064	0.011489	0.007038	0.001346	0.008614	-0.00106
	5.072	0.004146	0.004024	0.013373	0.012867	0.003694
	5.08	0.001663	0.025135	0.025863	0.010614	0.015893
	5.088	0.009718	-0.00544	-0.00655	0.020054	0.007506
	5.096	-0.00037	-0.00213	0.00176	0.006326	0.000392
	5.104	0.011576	0.012393	0.033386	0.011433	0.009482
	5.112	-0.01028	0.009553	-0.00068	0.01967	-0.00529
	5.12	-0.01889	0.002147	0.010031	0.018705	0.020156
	5.128	0.01309	-0.01029	0.01702	-0.00582	0.011829
	5.136	-0.01254	0.009272	0.015631	0.011713	0.012937
	5.144	0.025477	0.00321	0.027065	0.036538	0.005791
	5.152	-0.0151	0.001078	0.000669	0.022919	0.003783
	5.16	0.011958	0.001656	0.035711	0.018466	0.010907
	5.168	0.004078	0.005305	0.00479	0.002798	0.023397
	5.176	0.006249	0.02403	0.008333	0.009966	0.0197
	5.184	0.013459	-0.00534	0.003066	0.011264	0.013309
	5.192	0.006428	-0.01317	0.034154	-0.00229	0.009935
	5.2	0.009549	-0.00439	-0.01236	0.000917	-0.0055
