# Supplementary material for: Allosteric coupling asymmetry mediates paradoxical activation of BRAF by type II inhibitors
Source: eLife journal article supplement (doi:10.7554/elife.95481), 2024-04-03
Supplement: fig3-figsupp2-data1 [file Figure4_figure supplement 2 - source data 1.xlsx]

## Sheet: Sheet1
a
		BRAF DB+Q493C+Q664C +2x TEMPO			BRAF 16mut			BRAFQ493C+BTFA			BRAF K547C + AF488			BRAF K547C + AF568
		molecular weight (Da)	Normalized intensity					molecular weight (Da)	Normalized intensity		molecular weight (Da)	Normalized intensity		molecular weight (Da)	Normalized intensity
		25013	7.58e-06		31201	3040		30132	122000		25003.3	1.16e-05		25000	3.67e-06
		25014	4.69e-05		31201.1	3020		30133	120000		25003.6	6.03e-06		25000.3	7.41e-06
		25015	2.13e-05		31201.2	3010		30134	125000		25004	6.09e-06		25000.7	3.46e-06
		25016	1.62e-05		31201.3	3000		30135	139000		25007.6	2.81e-05		25002.3	4.9e-06
		25017	3.05e-05		31201.4	2980		30136	151000		25007.9	2.27e-05		25002.6	1.25e-05
		25038	5050		31201.5	2970		30137	156000		25008.2	4.82e-05		25003	7.71e-06
		25039	4920		31201.6	2960		30138	155000		25008.6	4.45e-05		25004.6	2.79e-06
		25040	5390		31201.7	2940		30139	156000		25008.9	1.86e-05		25004.9	8.43e-06
		25041	6320		31201.8	2930		30140	152000		25009.9	9.42e-06		25008.9	1.72e-06
		25042	7380		31201.9	2920		30141	143000		25015.8	5.98e-12		25012.5	5.07e-06
		25043	8180		31202	2910		30142	150000		25016.2	1.81e-11		25012.9	9.86e-07
		25044	8540		31202.1	2900		30143	168000		25016.5	5.49e-11		25013.2	4.39e-08
		25045	8570		31202.2	2890		30144	170000		25016.8	1.66e-10		25013.5	3.64e-14
		25046	8350		31202.3	2880		30145	166000		25017.2	5.04e-10		25020.1	1.82e-15
		25047	7820		31202.4	2870		30146	164000		25017.5	1.53e-09		25032.3	1.08e-09
		25048	6990		31202.5	2860		30147	160000		25017.8	4.63e-09		25032.7	7.58e-09
		25049	5990		31202.6	2850		30148	160000		25018.2	1.4e-08		25033	2.55e-08
		25050	4940		31202.7	2840		30149	163000		25018.5	4.25e-08		25033.3	7.73e-08
		25051	3960		31202.8	2830		30150	164000		25018.8	1.29e-07		25033.7	2.34e-07
		25052	3270		31202.9	2830		30151	162000		25019.1	3.9e-07		25034	7.09e-07
		25053	3000		31203	2820		30152	158000		25019.5	1.18e-06		25034.3	2.15e-06
		25054	3210		31203.1	2810		30153	152000		25019.8	3.56e-06		25034.7	5.89e-08
		25055	3900		31203.2	2800		30154	147000		25029	1.56e-06		25035	1.29e-10
		25056	4950		31203.3	2800		30155	144000		25029.4	4.72e-06		25035.3	1.26e-12
		25057	6180		31203.4	2790		30156	142000		25029.7	4.27e-09		25035.6	7.65e-14
		25058	7460		31203.5	2780		30157	142000		25030	1.84e-09		25040.6	9.95e-18
		25059	8550		31203.6	2780		30158	140000		25030.4	5.56e-09		25041.2	0
		25060	9140		31203.7	2770		30159	137000		25030.7	2.38e-08		25041.6	21400
		25061	9180		31203.8	2770		30160	143000		25031	1.11e-07		25041.9	23000
		25062	8760		31203.9	2760		30161	159000		25031.3	4.18e-07		25042.2	24500
		25063	8010		31204	2750		30162	173000		25031.7	1.23e-06		25042.6	25800
		25064	7100		31204.1	2750		30163	176000		25032	2.22e-06		25042.9	26800
		25065	6170		31204.2	2740		30164	170000		25032.3	4.85e-06		25043.2	27500
		25066	5390		31204.3	2740		30165	166000		25032.7	1.19e-06		25043.6	27800
		25067	4840		31204.4	2730		30166	165000		25033.3	1.09e-07		25043.9	27900
		25068	4390		31204.5	2730		30167	163000		25033.7	3.77e-07		25044.2	27900
		25069	3890		31204.6	2730		30168	162000		25034	1.15e-06		25044.6	27800
		25070	3430		31204.7	2720		30169	164000		25034.3	3.59e-06		25044.9	27300
		25071	3150		31204.8	2720		30170	170000		25034.7	8.26e-07		25045.2	26500
		25072	3070		31204.9	2710		30171	165000		25035	3.69e-07		25045.5	25100
		25073	3240		31205	2710		30172	154000		25035.3	1.6e-07		25045.9	23400
		25074	3640		31205.1	2710		30173	160000		25035.6	1.19e-07		25046.2	21600
		25075	4130		31205.2	2700		30174	176000		25036	2.21e-07		25046.5	20000
		25076	4630		31205.3	2700		30175	183000		25036.3	3.77e-08		25046.9	18700
		25077	5220		31205.4	2700		30176	173000		25041.6	10300		25047.2	18000
		25078	5880		31205.5	2690		30177	153000		25041.9	10800		25047.5	17800
		25079	6420		31205.6	2690		30178	137000		25042.2	11300		25047.8	18100
		25080	6720		31205.7	2690		30179	131000		25042.6	11900		25048.2	18600
		25081	6790		31205.8	2690		30180	136000		25042.9	12600		25048.5	18800
		25082	6600		31205.9	2680		30181	146000		25043.2	13200		25048.8	18000
		25083	6160		31206	2680		30182	148000		25043.6	13800		25049.2	16100
		25084	5630		31206.1	2680		30183	145000		25043.9	14400		25049.5	13900
		25085	5410		31206.2	2680		30184	146000		25044.2	15100		25049.8	12100
		25086	5830		31206.3	2670		30185	156000		25044.6	15800		25050.2	11200
		25087	6550		31206.4	2670		30186	173000		25044.9	16600		25050.5	10900
		25088	6680		31206.5	2670		30187	191000		25045.2	17300		25050.8	10900
		25089	5940		31206.6	2670		30188	204000		25045.5	17900		25051.2	11000
		25090	4890		31206.7	2660		30189	203000		25045.9	18200		25051.5	11300
		25091	4070		31206.8	2660		30190	189000		25046.2	18100		25051.8	11600
		25092	3600		31206.9	2660		30191	169000		25046.5	17800		25052.1	12000
		25093	3380		31207	2660		30192	154000		25046.9	17200		25052.5	12600
		25094	3310		31207.1	2650		30193	147000		25047.2	16500		25052.8	13300
		25095	3460		31207.2	2650		30194	144000		25047.5	15800		25053.1	14200
		25096	4150		31207.3	2650		30195	147000		25047.8	15100		25053.5	15300
		25097	5900		31207.4	2650		30196	154000		25048.2	14600		25053.8	17000
		25098	9100		31207.5	2640		30197	158000		25048.5	14300		25054.1	18900
		25099	12800		31207.6	2640		30198	164000		25048.8	14300		25054.4	20400
		25100	14800		31207.7	2640		30199	173000		25049.2	14400		25054.8	20700
		25101	13800		31207.8	2640		30200	167000		25049.5	14700		25055.1	19700
		25102	10800		31207.9	2630		30201	152000		25049.8	15000		25055.4	17800
		25103	7660		31208	2630		30202	144000		25050.2	15200		25055.8	15600
		25104	5640		31208.1	2630		30203	151000		25050.5	15200		25056.1	13800
		25105	4750		31208.2	2620		30204	167000		25050.8	15100		25056.4	12400
		25106	4480		31208.3	2620		30205	183000		25051.2	14700		25056.8	11700
		25107	4460		31208.4	2610		30206	198000		25051.5	14400		25057.1	12200
		25108	4690		31208.5	2610		30207	203000		25051.8	14200		25057.4	14700
		25109	5310		31208.6	2600		30208	191000		25052.1	14100		25057.8	18700
		25110	6230		31208.7	2590		30209	179000		25052.5	14200		25058.1	21400
		25111	6850		31208.8	2590		30210	173000		25052.8	14200		25058.4	20100
		25112	6790		31208.9	2580		30211	167000		25053.1	14000		25058.7	16600
		25113	6350		31209	2570		30212	156000		25053.5	13400		25059.1	14200
		25114	6020		31209.1	2560		30213	141000		25053.8	12600		25059.4	14200
		25115	6090		31209.2	2550		30214	129000		25054.1	11600		25059.7	15800
		25116	6760		31209.3	2540		30215	124000		25054.4	10600		25060.1	18300
		25117	7850		31209.4	2530		30216	127000		25054.8	9670		25060.4	21200
		25118	8660		31209.5	2520		30217	140000		25055.1	8950		25060.7	24400
		25119	8790		31209.6	2510		30218	160000		25055.4	8500		25061.1	27400
		25120	8680		31209.7	2500		30219	181000		25055.8	8310		25061.4	30000
		25121	8800		31209.8	2490		30220	204000		25056.1	8400		25061.7	31800
		25122	8870		31209.9	2470		30221	251000		25056.4	8740		25062	32700
		25123	8440		31210	2460		30222	286000		25056.8	9290		25062.4	32500
		25124	7530		31210.1	2450		30223	279000		25057.1	10000		25062.7	31400
		25125	6480		31210.2	2440		30224	249000		25057.4	10800		25063	29400
		25126	5530		31210.3	2430		30225	171000		25057.8	11700		25063.4	26800
		25127	4820		31210.4	2410		30226	111000		25058.1	12500		25063.7	23900
		25128	4350		31210.5	2400		30227	106000		25058.4	13300		25064	21100
		25129	4090		31210.6	2390		30228	118000		25058.7	14000		25064.3	18600
		25130	4100		31210.7	2380		30229	148000		25059.1	14600		25064.7	16200
		25131	4560		31210.8	2370		30230	189000		25059.4	15000		25065	13700
		25132	5620		31210.9	2360		30231	218000		25059.7	15300		25065.3	11500
		25133	7250		31211	2350		30232	221000		25060.1	15300		25065.7	9850
		25134	9110		31211.1	2340		30233	202000		25060.4	15100		25066	8770
		25135	10100		31211.2	2330		30234	174000		25060.7	14500		25066.3	8080
		25136	9350		31211.3	2320		30235	149000		25061.1	13800		25066.7	7650
		25137	7690		31211.4	2310		30236	136000		25061.4	12800		25067	7430
		25138	6530		31211.5	2300		30237	137000		25061.7	11900		25067.3	7430
		25139	6220		31211.6	2300		30238	143000		25062	11000		25067.7	7660
		25140	6270		31211.7	2290		30239	147000		25062.4	10300		25068	8130
		25141	6280		31211.8	2290		30240	155000		25062.7	9600		25068.3	8880
		25142	6230		31211.9	2280		30241	167000		25063	9140		25068.6	9920
		25143	6350		31212	2280		30242	176000		25063.4	8920		25069	11200
		25144	6610		31212.1	2270		30243	176000		25063.7	8960		25069.3	12700
		25145	6700		31212.2	2270		30244	165000		25064	9240		25069.6	15400
		25146	6650		31212.3	2270		30245	151000		25064.3	9740		25070	23400
		25147	6590		31212.4	2270		30246	137000		25064.7	10400		25070.3	45400
		25148	6250		31212.5	2270		30247	127000		25065	11200		25070.6	85700
		25149	5520		31212.6	2270		30248	144000		25065.3	12000		25070.9	127000
		25150	4780		31212.7	2270		30249	169000		25065.7	12800		25071.3	136000
		25151	4360		31212.8	2270		30250	166000		25066	13600		25071.6	105000
		25152	4360		31212.9	2270		30251	193000		25066.3	14300		25071.9	60400
		25153	4910		31213	2270		30252	245000		25066.7	14900		25072.3	31000
		25154	6140		31213.1	2280		30253	246000		25067	15300		25072.6	19200
		25155	7780		31213.2	2280		30254	229000		25067.3	15400		25072.9	16100
		25156	8950		31213.3	2290		30255	233000		25067.7	15000		25073.3	15300
		25157	8770		31213.4	2290		30256	224000		25068	14300		25073.6	14900
		25158	7520		31213.5	2300		30257	194000		25068.3	13600		25073.9	14600
		25159	6290		31213.6	2300		30258	175000		25068.6	13100		25074.2	14200
		25160	5610		31213.7	2310		30259	174000		25069	13000		25074.6	13900
		25161	5220		31213.8	2320		30260	173000		25069.3	13500		25074.9	13500
		25162	4880		31213.9	2330		30261	158000		25069.6	14700		25075.2	13100
		25163	4710		31214	2340		30262	136000		25070	16600		25075.6	12600
		25164	4820		31214.1	2350		30263	122000		25070.3	18800		25075.9	12300
		25165	4980		31214.2	2360		30264	123000		25070.6	21100		25076.2	12000
		25166	4910		31214.3	2370		30265	137000		25070.9	22600		25076.6	11900
		25167	4740		31214.4	2380		30266	156000		25071.3	22900		25076.9	11900
		25168	4630		31214.5	2390		30267	172000		25071.6	21800		25077.2	12100
		25169	4580		31214.6	2400		30268	181000		25071.9	19600		25077.6	12400
		25170	4890		31214.7	2410		30269	186000		25072.3	16800		25077.9	12700
		25171	6480		31214.8	2430		30270	184000		25072.6	14100		25078.2	12800
		25172	9660		31214.9	2440		30271	167000		25072.9	11900		25078.5	12900
		25173	12500		31215	2450		30272	148000		25073.3	10600		25078.9	12800
		25174	12400		31215.1	2470		30273	141000		25073.6	9880		25079.2	12800
		25175	9650		31215.2	2480		30274	161000		25073.9	9690		25079.5	12700
		25176	6910		31215.3	2500		30275	199000		25074.2	9810		25079.9	12800
		25177	5410		31215.4	2510		30276	202000		25074.6	10100		25080.2	13000
		25178	4660		31215.5	2530		30277	190000		25074.9	10500		25080.5	13500
		25179	4190		31215.6	2540		30278	202000		25075.2	11000		25080.8	14300
		25180	3960		31215.7	2560		30279	215000		25075.6	11600		25081.2	15500
		25181	3920		31215.8	2570		30280	228000		25075.9	12200		25081.5	16800
		25182	4050		31215.9	2590		30281	239000		25076.2	12800		25081.8	18100
		25183	4580		31216	2610		30282	227000		25076.6	13300		25082.2	19000
		25184	5620		31216.1	2630		30283	219000		25076.9	13700		25082.5	19400
		25185	6890		31216.2	2640		30284	230000		25077.2	13800		25082.8	19100
		25186	7900		31216.3	2660		30285	210000		25077.6	13800		25083.2	18100
		25187	8550		31216.4	2680		30286	170000		25077.9	13500		25083.5	16400
		25188	9290		31216.5	2700		30287	159000		25078.2	13200		25083.8	14200
		25189	9910		31216.6	2720		30288	164000		25078.5	12800		25084.2	12000
		25190	9540		31216.7	2740		30289	161000		25078.9	12300		25084.5	10100
		25191	8090		31216.8	2770		30290	158000		25079.2	11800		25084.8	8780
		25192	6510		31216.9	2790		30291	164000		25079.5	11300		25085.1	8010
		25193	5440		31217	2810		30292	174000		25079.9	10800		25085.5	7680
		25194	4970		31217.1	2830		30293	178000		25080.2	10500		25085.8	7710
		25195	4800		31217.2	2850		30294	174000		25080.5	10200		25086.1	8010
		25196	4560		31217.3	2880		30295	170000		25080.8	10100		25086.5	8520
		25197	4180		31217.4	2900		30296	175000		25081.2	10100		25086.8	9200
		25198	3860		31217.5	2920		30297	194000		25081.5	10200		25087.1	10000
		25199	3760		31217.6	2950		30298	209000		25081.8	10300		25087.4	10900
		25200	3910		31217.7	2970		30299	197000		25082.2	10500		25087.8	11900
		25201	4440		31217.8	2990		30300	165000		25082.5	10600		25088.1	12900
		25202	5590		31217.9	3020		30301	140000		25082.8	10700		25088.4	14000
		25203	7440		31218	3040		30302	137000		25083.2	10800		25088.8	15100
		25204	9350		31218.1	3060		30303	144000		25083.5	10900		25089.1	16100
		25205	10200		31218.2	3090		30304	153000		25083.8	10900		25089.4	17500
		25206	9300		31218.3	3110		30305	179000		25084.2	11000		25089.8	20200
		25207	7290		31218.4	3130		30306	207000		25084.5	11100		25090.1	25300
		25208	5360		31218.5	3160		30307	208000		25084.8	11000		25090.4	30800
		25209	4200		31218.6	3180		30308	194000		25085.1	10700		25090.8	32700
		25210	3810		31218.7	3200		30309	179000		25085.5	10100		25091.1	29700
		25211	3950		31218.8	3220		30310	159000		25085.8	9450		25091.4	25100
		25212	4440		31218.9	3250		30311	141000		25086.1	8730		25091.7	22200
		25213	5090		31219	3270		30312	133000		25086.5	8180		25092.1	20600
		25214	5580		31219.1	3290		30313	141000		25086.8	7860		25092.4	19200
		25215	5650		31219.2	3310		30314	159000		25087.1	7790		25092.7	17300
		25216	5440		31219.3	3330		30315	169000		25087.4	7970		25093.1	15000
		25217	5220		31219.4	3350		30316	167000		25087.8	8400		25093.4	12800
		25218	5000		31219.5	3370		30317	166000		25088.1	9080		25093.7	10800
		25219	4840		31219.6	3390		30318	168000		25088.4	10000		25094.1	9420
		25220	4810		31219.7	3410		30319	164000		25088.8	11200		25094.4	8670
		25221	4880		31219.8	3430		30320	161000		25089.1	12600		25094.7	8520
		25222	4990		31219.9	3440		30321	169000		25089.4	14100		25095	8810
		25223	5210		31220	3460		30322	179000		25089.8	15700		25095.4	9170
		25224	5640		31220.1	3480		30323	182000		25090.1	17200		25095.7	9370
		25225	6180		31220.2	3500		30324	181000		25090.4	18300		25096	9460
		25226	6760		31220.3	3510		30325	177000		25090.8	19000		25096.4	9570
		25227	7390		31220.4	3530		30326	169000		25091.1	19000		25096.7	9770
		25228	8130		31220.5	3540		30327	164000		25091.4	18400		25097	10100
		25229	9030		31220.6	3560		30328	177000		25091.7	17300		25097.3	10400
		25230	9790		31220.7	3570		30329	190000		25092.1	16000		25097.7	10900
		25231	9750		31220.8	3590		30330	175000		25092.4	14700		25098	11400
		25232	8680		31220.9	3600		30331	166000		25092.7	13400		25098.3	12000
		25233	7190		31221	3610		30332	170000		25093.1	12200		25098.7	12500
		25234	5950		31221.1	3620		30333	164000		25093.4	11200		25099	12700
		25235	5180		31221.2	3640		30334	150000		25093.7	10400		25099.3	12700
		25236	4830		31221.3	3650		30335	138000		25094.1	9750		25099.7	12300
		25237	4900		31221.4	3660		30336	132000		25094.4	9290		25100	11800
		25238	5380		31221.5	3660		30337	137000		25094.7	9010		25100.3	11300
		25239	6050		31221.6	3670		30338	160000		25095	8910		25100.7	10900
		25240	6560		31221.7	3680		30339	221000		25095.4	9020		25101	10500
		25241	6820		31221.8	3690		30340	278000		25095.7	9350		25101.3	10100
		25242	7070		31221.9	3690		30341	272000		25096	9880		25101.6	9580
		25243	7580		31222	3700		30342	250000		25096.4	10500		25102	9290
		25244	8290		31222.1	3700		30343	239000		25096.7	11200		25102.3	9310
		25245	8910		31222.2	3700		30344	217000		25097	11700		25102.6	9570
		25246	9280		31222.3	3710		30345	185000		25097.3	11900		25103	10000
		25247	9420		31222.4	3710		30346	159000		25097.7	11900		25103.3	10600
		25248	9510		31222.5	3710		30347	147000		25098	11600		25103.6	11300
		25249	9380		31222.6	3710		30348	144000		25098.3	11200		25103.9	12100
		25250	8530		31222.7	3710		30349	143000		25098.7	10700		25104.3	13100
		25251	7010		31222.8	3710		30350	151000		25099	10200		25104.6	14300
		25252	5510		31222.9	3700		30351	152000		25099.3	9680		25104.9	15800
		25253	4590		31223	3700		30352	132000		25099.7	9280		25105.3	17700
		25254	4270		31223.1	3700		30353	131000		25100	8960		25105.6	19700
		25255	4470		31223.2	3690		30354	165000		25100.3	8730		25105.9	21400
		25256	5060		31223.3	3690		30355	210000		25100.7	8570		25106.3	22200
		25257	5570		31223.4	3690		30356	235000		25101	8480		25106.6	21800
		25258	5540		31223.5	3680		30357	226000		25101.3	8480		25106.9	20400
		25259	5420		31223.6	3680		30358	202000		25101.6	8560		25107.2	18700
		25260	5850		31223.7	3670		30359	179000		25102	8740		25107.6	16800
		25261	7180		31223.8	3670		30360	158000		25102.3	9010		25107.9	15200
		25262	9370		31223.9	3660		30361	144000		25102.6	9350		25108.2	14600
		25263	11300		31224	3650		30362	139000		25103	9740		25108.6	17200
		25264	11100		31224.1	3650		30363	143000		25103.3	10100		25108.9	24900
		25265	8830		31224.2	3640		30364	151000		25103.6	10500		25109.2	33300
		25266	6640		31224.3	3640		30365	162000		25103.9	10800		25109.6	33400
		25267	6020		31224.4	3630		30366	179000		25104.3	11100		25109.9	24100
		25268	6600		31224.5	3620		30367	187000		25104.6	11400		25110.2	14100
		25269	7450		31224.6	3620		30368	170000		25104.9	11700		25110.6	9260
		25270	7750		31224.7	3610		30369	142000		25105.3	12100		25110.9	8460
		25271	7130		31224.8	3600		30370	118000		25105.6	12500		25111.2	9200
		25272	5960		31224.9	3600		30371	107000		25105.9	12900		25111.5	10400
		25273	4960		31225	3590		30372	115000		25106.3	13300		25111.9	11600
		25274	4520		31225.1	3580		30373	140000		25106.6	13600		25112.2	12700
		25275	4760		31225.2	3570		30374	175000		25106.9	13800		25112.5	13600
		25276	5870		31225.3	3570		30375	209000		25107.2	13900		25112.9	14300
		25277	8140		31225.4	3560		30376	222000		25107.6	13900		25113.2	14800
		25278	11000		31225.5	3550		30377	211000		25107.9	13800		25113.5	14700
		25279	13000		31225.6	3540		30378	193000		25108.2	13600		25113.8	14400
		25280	12600		31225.7	3540		30379	191000		25108.6	13300		25114.2	14000
		25281	10400		31225.8	3530		30380	213000		25108.9	12800		25114.5	13600
		25282	7760		31225.9	3520		30381	209000		25109.2	12200		25114.8	13300
		25283	5770		31226	3510		30382	170000		25109.6	11500		25115.2	13100
		25284	4600		31226.1	3500		30383	146000		25109.9	10900		25115.5	12900
		25285	4130		31226.2	3500		30384	143000		25110.2	10400		25115.8	12600
		25286	4310		31226.3	3490		30385	143000		25110.6	9940		25116.2	12500
		25287	5010		31226.4	3480		30386	153000		25110.9	9690		25116.5	12500
		25288	5910		31226.5	3470		30387	179000		25111.2	9590		25116.8	12700
		25289	6520		31226.6	3460		30388	200000		25111.5	9660		25117.2	12700
		25290	6650		31226.7	3450		30389	204000		25111.9	9880		25117.5	12400
		25291	6620		31226.8	3440		30390	187000		25112.2	10200		25117.8	12100
		25292	6760		31226.9	3430		30391	166000		25112.5	10500		25118.1	12100
		25293	6980		31227	3420		30392	155000		25112.9	10900		25118.5	12300
		25294	7110		31227.1	3410		30393	156000		25113.2	11100		25118.8	12700
		25295	7090		31227.2	3400		30394	164000		25113.5	11100		25119.1	12900
		25296	6930		31227.3	3390		30395	173000		25113.8	11100		25119.5	13000
		25297	6650		31227.4	3380		30396	178000		25114.2	10800		25119.8	12900
		25298	6360		31227.5	3370		30397	182000		25114.5	10500		25120.1	12600
		25299	6180		31227.6	3360		30398	195000		25114.8	10100		25120.4	12200
		25300	6090		31227.7	3350		30399	212000		25115.2	9630		25120.8	11800
		25301	5890		31227.8	3340		30400	224000		25115.5	9230		25121.1	11600
		25302	5480		31227.9	3330		30401	228000		25115.8	8870		25121.4	11600
		25303	5050		31228	3320		30402	222000		25116.2	8590		25121.8	12000
		25304	4930		31228.1	3300		30403	202000		25116.5	8370		25122.1	12700
		25305	5170		31228.2	3290		30404	171000		25116.8	8220		25122.4	13800
		25306	5560		31228.3	3280		30405	146000		25117.2	8140		25122.8	15600
		25307	5790		31228.4	3270		30406	151000		25117.5	8110		25123.1	18000
		25308	5700		31228.5	3260		30407	166000		25117.8	8160		25123.4	21000
		25309	5540		31228.6	3250		30408	162000		25118.1	8280		25123.8	24600
		25310	5660		31228.7	3230		30409	165000		25118.5	8490		25124.1	27800
		25311	6080		31228.8	3220		30410	186000		25118.8	8820		25124.4	29000
		25312	6500		31228.9	3210		30411	207000		25119.1	9300		25124.7	27200
		25313	6540		31229	3200		30412	216000		25119.5	9910		25125.1	22500
		25314	6060		31229.1	3190		30413	207000		25119.8	10700		25125.4	16700
		25315	5470		31229.2	3180		30414	192000		25120.1	11400		25125.7	11800
		25316	5300		31229.3	3170		30415	185000		25120.4	12200		25126.1	8660
		25317	5790		31229.4	3160		30416	185000		25120.8	12800		25126.4	7300
		25318	6680		31229.5	3150		30417	185000		25121.1	13200		25126.7	7150
		25319	7160		31229.6	3140		30418	191000		25121.4	13400		25127.1	7930
		25320	6830		31229.7	3140		30419	203000		25121.8	13400		25127.4	9740
		25321	6280		31229.8	3130		30420	212000		25122.1	13200		25127.7	12400
		25322	6120		31229.9	3120		30421	216000		25122.4	13000		25128	15300
		25323	6260		31230	3110		30422	210000		25122.8	12700		25128.4	18900
		25324	6290		31230.1	3110		30423	196000		25123.1	12500		25128.7	27100
		25325	6090		31230.2	3100		30424	181000		25123.4	12500		25129	45600
		25326	5910		31230.3	3100		30425	163000		25123.8	12500		25129.4	71700
		25327	5930		31230.4	3090		30426	141000		25124.1	12600		25129.7	89400
		25328	5950		31230.5	3090		30427	124000		25124.4	12700		25130	85000
		25329	5660		31230.6	3080		30428	128000		25124.7	12900		25130.3	63600
		25330	5130		31230.7	3080		30429	151000		25125.1	13100		25130.7	41500
		25331	4680		31230.8	3080		30430	164000		25125.4	13400		25131	27900
		25332	4520		31230.9	3080		30431	169000		25125.7	13800		25131.3	21700
		25333	4660		31231	3070		30432	193000		25126.1	14500		25131.7	18800
		25334	5050		31231.1	3070		30433	248000		25126.4	15400		25132	17000
		25335	5690		31231.2	3070		30434	300000		25126.7	16800		25132.3	15400
		25336	6460		31231.3	3070		30435	296000		25127.1	18500		25132.7	13900
		25337	7060		31231.4	3070		30436	244000		25127.4	20700		25133	12600
		25338	7260		31231.5	3070		30437	199000		25127.7	23000		25133.3	11400
		25339	7010		31231.6	3080		30438	182000		25128	25300		25133.7	10400
		25340	6550		31231.7	3080		30439	177000		25128.4	27400		25134	9610
		25341	6270		31231.8	3080		30440	171000		25128.7	29100		25134.3	8910
		25342	6280		31231.9	3080		30441	164000		25129	30100		25134.6	8360
		25343	6350		31232	3080		30442	161000		25129.4	30200		25135	7980
		25344	6340		31232.1	3090		30443	161000		25129.7	29000		25135.3	7810
		25345	6360		31232.2	3090		30444	157000		25130	26500		25135.6	7850
		25346	6440		31232.3	3090		30445	153000		25130.3	23200		25136	8040
		25347	6400		31232.4	3090		30446	158000		25130.7	19600		25136.3	8360
		25348	6200		31232.5	3100		30447	165000		25131	16200		25136.6	8880
		25349	5970		31232.6	3100		30448	163000		25131.3	13500		25136.9	9700
		25350	5830		31232.7	3100		30449	158000		25131.7	11600		25137.3	10900
		25351	5710		31232.8	3100		30450	167000		25132	10400		25137.6	12600
		25352	5490		31232.9	3110		30451	192000		25132.3	9840		25137.9	14500
		25353	5160		31233	3110		30452	220000		25132.7	9760		25138.3	16400
		25354	4930		31233.1	3110		30453	225000		25133	10000		25138.6	18100
		25355	5000		31233.2	3110		30454	208000		25133.3	10400		25138.9	19100
		25356	5320		31233.3	3110		30455	187000		25133.7	10900		25139.3	19400
		25357	5710		31233.4	3120		30456	166000		25134	11400		25139.6	18800
		25358	6090		31233.5	3120		30457	177000		25134.3	11700		25139.9	17700
		25359	6470		31233.6	3120		30458	219000		25134.6	11800		25140.2	16300
		25360	6850		31233.7	3120		30459	226000		25135	11900		25140.6	14900
		25361	7280		31233.8	3120		30460	212000		25135.3	12000		25140.9	13700
		25362	7700		31233.9	3120		30461	217000		25135.6	12200		25141.2	12800
		25363	7860		31234	3120		30462	221000		25136	12500		25141.6	12100
		25364	7560		31234.1	3130		30463	211000		25136.3	12900		25141.9	11600
		25365	6880		31234.2	3130		30464	192000		25136.6	13600		25142.2	11300
		25366	6100		31234.3	3130		30465	180000		25136.9	14500		25142.6	11000
		25367	5340		31234.4	3130		30466	201000		25137.3	15700		25142.9	10800
		25368	4670		31234.5	3130		30467	228000		25137.6	17200		25143.2	10700
		25369	4090		31234.6	3130		30468	202000		25137.9	19000		25143.6	10400
		25370	3680		31234.7	3130		30469	166000		25138.3	21000		25143.9	10200
		25371	3420		31234.8	3130		30470	163000		25138.6	23100		25144.2	10000
		25372	3300		31234.9	3130		30471	172000		25138.9	25300		25144.5	9880
		25373	3460		31235	3130		30472	183000		25139.3	27200		25144.9	9930
		25374	4210		31235.1	3130		30473	198000		25139.6	28900		25145.2	10200
		25375	6010		31235.2	3130		30474	229000		25139.9	30100		25145.5	10800
		25376	9020		31235.3	3130		30475	257000		25140.2	30800		25145.9	11600
		25377	12600		31235.4	3130		30476	246000		25140.6	30800		25146.2	12500
		25378	15800		31235.5	3130		30477	205000		25140.9	30200		25146.5	13300
		25379	17600		31235.6	3130		30478	173000		25141.2	29000		25146.8	13900
		25380	16600		31235.7	3130		30479	155000		25141.6	27200		25147.2	14100
		25381	12800		31235.8	3130		30480	143000		25141.9	25100		25147.5	14000
		25382	8150		31235.9	3120		30481	137000		25142.2	22900		25147.8	13700
		25383	4860		31236	3120		30482	144000		25142.6	20700		25148.2	13200
		25384	3320		31236.1	3120		30483	163000		25142.9	18700		25148.5	12500
		25385	2950		31236.2	3120		30484	216000		25143.2	16900		25148.8	11800
		25386	3210		31236.3	3120		30485	261000		25143.6	15400		25149.2	11200
		25387	3760		31236.4	3110		30486	233000		25143.9	14200		25149.5	10500
		25388	4420		31236.5	3110		30487	196000		25144.2	13300		25149.8	9990
		25389	5130		31236.6	3110		30488	197000		25144.5	12600		25150.2	9620
		25390	5610		31236.7	3100		30489	201000		25144.9	12000		25150.5	9430
		25391	5800		31236.8	3100		30490	187000		25145.2	11700		25150.8	9410
		25392	6050		31236.9	3100		30491	172000		25145.5	11500		25151.1	9490
		25393	6790		31237	3090		30492	172000		25145.9	11400		25151.5	9600
		25394	8230		31237.1	3090		30493	178000		25146.2	11400		25151.8	9630
		25395	10100		31237.2	3080		30494	172000		25146.5	11600		25152.1	9570
		25396	11500		31237.3	3070		30495	156000		25146.8	11700		25152.5	9540
		25397	11400		31237.4	3070		30496	136000		25147.2	11800		25152.8	9770
		25398	9770		31237.5	3060		30497	122000		25147.5	11800		25153.1	10300
		25399	7530		31237.6	3050		30498	128000		25147.8	11500		25153.4	11000
		25400	5690		31237.7	3050		30499	148000		25148.2	11200		25153.8	11700
		25401	4840		31237.8	3040		30500	158000		25148.5	10800		25154.1	12400
		25402	5010		31237.9	3030		30501	174000		25148.8	10400		25154.4	13000
		25403	5750		31238	3020		30502	196000		25149.2	9890		25154.8	13500
		25404	6380		31238.1	3010		30503	205000		25149.5	9440		25155.1	13600
		25405	6580		31238.2	3000		30504	238000		25149.8	9050		25155.4	13400
		25406	6410		31238.3	2990		30505	272000		25150.2	8760		25155.8	13200
		25407	5910		31238.4	2980		30506	240000		25150.5	8590		25156.1	13000
		25408	5200		31238.5	2970		30507	201000		25150.8	8550		25156.4	12900
		25409	4790		31238.6	2950		30508	204000		25151.1	8630		25156.8	12900
		25410	5090		31238.7	2940		30509	230000		25151.5	8830		25157.1	12900
		25411	5920		31238.8	2930		30510	262000		25151.8	9120		25157.4	12700
		25412	6620		31238.9	2920		30511	248000		25152.1	9510		25157.7	12300
		25413	6860		31239	2910		30512	186000		25152.5	10000		25158.1	11900
		25414	6820		31239.1	2890		30513	150000		25152.8	10600		25158.4	11400
		25415	6830		31239.2	2880		30514	152000		25153.1	11400		25158.7	11100
		25416	7110		31239.3	2870		30515	161000		25153.4	12300		25159.1	10800
		25417	7760		31239.4	2850		30516	179000		25153.8	13200		25159.4	10800
		25418	8310		31239.5	2840		30517	204000		25154.1	14300		25159.7	10900
		25419	8000		31239.6	2830		30518	209000		25154.4	15500		25160.1	11000
		25420	6860		31239.7	2820		30519	203000		25154.8	16900		25160.4	11200
		25421	5660		31239.8	2800		30520	208000		25155.1	18300		25160.7	11300
		25422	5070		31239.9	2790		30521	212000		25155.4	19700		25161	11200
		25423	5290		31240	2780		30522	210000		25155.8	21000		25161.4	11200
		25424	5930		31240.1	2770		30523	197000		25156.1	22200		25161.7	11300
		25425	6290		31240.2	2760		30524	176000		25156.4	23100		25162	11600
		25426	6300		31240.3	2750		30525	157000		25156.8	23600		25162.4	11900
		25427	6390		31240.4	2740		30526	146000		25157.1	23600		25162.7	12100
		25428	6590		31240.5	2730		30527	140000		25157.4	23100		25163	12000
		25429	6630		31240.6	2720		30528	138000		25157.7	22300		25163.3	11800
		25430	6450		31240.7	2710		30529	143000		25158.1	21200		25163.7	11500
		25431	6320		31240.8	2700		30530	156000		25158.4	19800		25164	11400
		25432	6460		31240.9	2700		30531	173000		25158.7	18400		25164.3	11400
		25433	6820		31241	2690		30532	189000		25159.1	17000		25164.7	11700
		25434	7190		31241.1	2680		30533	196000		25159.4	15700		25165	12200
		25435	7430		31241.2	2680		30534	210000		25159.7	14400		25165.3	12800
		25436	7400		31241.3	2670		30535	220000		25160.1	13100		25165.7	13400
		25437	7010		31241.4	2670		30536	196000		25160.4	12000		25166	13800
		25438	6360		31241.5	2670		30537	180000		25160.7	10900		25166.3	14000
		25439	5660		31241.6	2660		30538	187000		25161	9970		25166.7	14000
		25440	5200		31241.7	2660		30539	191000		25161.4	9160		25167	13600
		25441	5260		31241.8	2660		30540	197000		25161.7	8490		25167.3	13100
		25442	5780		31241.9	2650		30541	200000		25162	7940		25167.6	12600
		25443	6390		31242	2650		30542	189000		25162.4	7500		25168	12500
		25444	6880		31242.1	2650		30543	174000		25162.7	7160		25168.3	12900
		25445	7330		31242.2	2650		30544	166000		25163	6920		25168.6	13700
		25446	7840		31242.3	2650		30545	167000		25163.3	6780		25169	14700
		25447	8310		31242.4	2650		30546	190000		25163.7	6760		25169.3	16000
		25448	8350		31242.5	2650		30547	216000		25164	6860		25169.6	17500
		25449	7710		31242.6	2650		30548	203000		25164.3	7060		25170	18900
		25450	6640		31242.7	2660		30549	169000		25164.7	7360		25170.3	19200
		25451	5470		31242.8	2660		30550	155000		25165	7740		25170.6	17900
		25452	4340		31242.9	2660		30551	156000		25165.3	8190		25170.9	15600
		25453	3410		31243	2670		30552	163000		25165.7	8700		25171.3	13600
		25454	2890		31243.1	2670		30553	173000		25166	9270		25171.6	12600
		25455	2860		31243.2	2670		30554	185000		25166.3	9880		25171.9	12600
		25456	3270		31243.3	2680		30555	202000		25166.7	10500		25172.3	13200
		25457	4020		31243.4	2680		30556	210000		25167	11300		25172.6	14000
		25458	4980		31243.5	2680		30557	206000		25167.3	12000		25172.9	15000
		25459	6040		31243.6	2690		30558	209000		25167.6	12800		25173.2	16000
		25460	7190		31243.7	2690		30559	243000		25168	13600		25173.6	17100
		25461	8480		31243.8	2700		30560	282000		25168.3	14300		25173.9	18300
		25462	9740		31243.9	2700		30561	254000		25168.6	15000		25174.2	19400
		25463	10400		31244	2700		30562	193000		25169	15600		25174.6	20200
		25464	9880		31244.1	2710		30563	157000		25169.3	16000		25174.9	20700
		25465	8690		31244.2	2710		30564	156000		25169.6	16200		25175.2	21000
		25466	7980		31244.3	2720		30565	176000		25170	16300		25175.6	21000
		25467	7940		31244.4	2730		30566	186000		25170.3	16100		25175.9	20400
		25468	7710		31244.5	2730		30567	178000		25170.6	15900		25176.2	19100
		25469	6730		31244.6	2740		30568	169000		25170.9	15600		25176.6	17000
		25470	5350		31244.7	2750		30569	172000		25171.3	15300		25176.9	14700
		25471	4250		31244.8	2760		30570	185000		25171.6	15100		25177.2	12400
		25472	3800		31244.9	2780		30571	196000		25171.9	15100		25177.5	10500
		25473	4040		31245	2790		30572	195000		25172.3	15200		25177.9	8950
		25474	4760		31245.1	2800		30573	188000		25172.6	15300		25178.2	7750
		25475	5730		31245.2	2820		30574	184000		25172.9	15400		25178.5	6820
		25476	6560		31245.3	2840		30575	193000		25173.2	15500		25178.9	6110
		25477	6730		31245.4	2850		30576	202000		25173.6	15600		25179.2	5680
		25478	6050		31245.5	2870		30577	181000		25173.9	15500		25179.5	5520
		25479	5020		31245.6	2890		30578	160000		25174.2	15400		25179.8	5640
		25480	4300		31245.7	2910		30579	161000		25174.6	15100		25180.2	6110
		25481	4150		31245.8	2940		30580	165000		25174.9	14700		25180.5	7030
		25482	4580		31245.9	2960		30581	178000		25175.2	14300		25180.8	8410
		25483	5540		31246	2980		30582	206000		25175.6	13700		25181.2	10300
		25484	6940		31246.1	3010		30583	239000		25175.9	13100		25181.5	12500
		25485	8420		31246.2	3040		30584	258000		25176.2	12500		25181.8	15000
		25486	9320		31246.3	3060		30585	250000		25176.6	11800		25182.2	17500
		25487	9170		31246.4	3090		30586	224000		25176.9	11200		25182.5	19700
		25488	8240		31246.5	3120		30587	205000		25177.2	10600		25182.8	21000
		25489	7340		31246.6	3150		30588	200000		25177.5	10100		25183.2	21500
		25490	7270		31246.7	3170		30589	186000		25177.9	9720		25183.5	21200
		25491	8560		31246.8	3200		30590	156000		25178.2	9500		25183.8	20300
		25492	10900		31246.9	3230		30591	136000		25178.5	9380		25184.1	19000
		25493	12600		31247	3260		30592	143000		25178.9	9370		25184.5	17700
		25494	12000		31247.1	3290		30593	166000		25179.2	9550		25184.8	16500
		25495	10100		31247.2	3320		30594	188000		25179.5	9880		25185.1	15500
		25496	8130		31247.3	3360		30595	200000		25179.8	10300		25185.5	14900
		25497	6570		31247.4	3390		30596	200000		25180.2	10800		25185.8	14500
		25498	5610		31247.5	3420		30597	193000		25180.5	11300		25186.1	14600
		25499	5330		31247.6	3450		30598	185000		25180.8	11800		25186.5	17300
		25500	5460		31247.7	3480		30599	177000		25181.2	12300		25186.8	29100
		25501	5680		31247.8	3520		30600	177000		25181.5	12500		25187.1	59000
		25502	5700		31247.9	3550		30601	187000		25181.8	12600		25187.4	102000
		25503	5380		31248	3580		30602	204000		25182.2	12400		25187.8	129000
		25504	4950		31248.1	3610		30603	235000		25182.5	12200		25188.1	115000
		25505	4970		31248.2	3640		30604	251000		25182.8	11900		25188.4	73700
		25506	5860		31248.3	3680		30605	222000		25183.2	11600		25188.8	38500
		25507	7490		31248.4	3710		30606	195000		25183.5	11400		25189.1	21900
		25508	9200		31248.5	3740		30607	189000		25183.8	11300		25189.4	16800
		25509	9910		31248.6	3770		30608	181000		25184.1	11300		25189.8	15300
		25510	9020		31248.7	3810		30609	204000		25184.5	11600		25190.1	14300
		25511	7130		31248.8	3840		30610	237000		25184.8	12200		25190.4	13400
		25512	5400		31248.9	3870		30611	228000		25185.1	13300		25190.7	12400
		25513	4410		31249	3900		30612	210000		25185.5	15200		25191.1	11400
		25514	4130		31249.1	3930		30613	196000		25185.8	18200		25191.4	10500
		25515	4490		31249.2	3960		30614	195000		25186.1	22300		25191.7	9840
		25516	5490		31249.3	3990		30615	207000		25186.5	27600		25192.1	9360
		25517	7030		31249.4	4020		30616	211000		25186.8	33200		25192.4	9060
		25518	8640		31249.5	4050		30617	208000		25187.1	38100		25192.7	8850
		25519	9220		31249.6	4080		30618	199000		25187.4	41100		25193.1	8680
		25520	8200		31249.7	4110		30619	189000		25187.8	41600		25193.4	8520
		25521	6690		31249.8	4130		30620	179000		25188.1	39500		25193.7	8420
		25522	5920		31249.9	4160		30621	167000		25188.4	35500		25194	8430
		25523	6020		31250	4180		30622	153000		25188.8	30700		25194.4	8570
		25524	6650		31250.1	4210		30623	146000		25189.1	25900		25194.7	8870
		25525	7350		31250.2	4230		30624	157000		25189.4	21800		25195	9320
		25526	7530		31250.3	4250		30625	179000		25189.8	18700		25195.4	9880
		25527	7060		31250.4	4280		30626	201000		25190.1	16400		25195.7	10500
		25528	6290		31250.5	4300		30627	213000		25190.4	14700		25196	11000
		25529	5530		31250.6	4320		30628	208000		25190.7	13500		25196.3	11400
		25530	4890		31250.7	4340		30629	191000		25191.1	12500		25196.7	11700
		25531	4390		31250.8	4360		30630	175000		25191.4	11800		25197	11800
		25532	4140		31250.9	4380		30631	161000		25191.7	11300		25197.3	11900
		25533	4240		31251	4390		30632	151000		25192.1	10900		25197.7	11900
		25534	4770		31251.1	4410		30633	158000		25192.4	10600		25198	11900
		25535	5760		31251.2	4430		30634	188000		25192.7	10300		25198.3	11800
		25536	7060		31251.3	4440		30635	240000		25193.1	10200		25198.7	11800
		25537	8310		31251.4	4460		30636	275000		25193.4	10000		25199	11800
		25538	8990		31251.5	4470		30637	263000		25193.7	9900		25199.3	11800
		25539	8960		31251.6	4490		30638	239000		25194	9790		25199.7	12000
		25540	8630		31251.7	4500		30639	219000		25194.4	9710		25200	12300
		25541	8330		31251.8	4510		30640	214000		25194.7	9640		25200.3	12600
		25542	7850		31251.9	4530		30641	227000		25195	9580		25200.6	13100
		25543	7020		31252	4540		30642	231000		25195.4	9520		25201	13700
		25544	6080		31252.1	4550		30643	212000		25195.7	9440		25201.3	14400
		25545	5470		31252.2	4560		30644	178000		25196	9340		25201.6	15100
		25546	5450		31252.3	4570		30645	161000		25196.3	9200		25202	15900
		25547	6000		31252.4	4570		30646	157000		25196.7	9020		25202.3	16500
		25548	6920		31252.5	4580		30647	144000		25197	8810		25202.6	17100
		25549	7730		31252.6	4590		30648	147000		25197.3	8590		25203	17500
		25550	7960		31252.7	4590		30649	178000		25197.7	8370		25203.3	17800
		25551	7620		31252.8	4600		30650	208000		25198	8160		25203.6	18200
		25552	7190		31252.9	4600		30651	213000		25198.3	7990		25203.9	18400
		25553	7100		31253	4600		30652	196000		25198.7	7860		25204.3	18300
		25554	7400		31253.1	4600		30653	185000		25199	7770		25204.6	17900
		25555	7760		31253.2	4600		30654	183000		25199.3	7730		25204.9	17000
		25556	8020		31253.3	4600		30655	180000		25199.7	7770		25205.3	15900
		25557	8240		31253.4	4600		30656	174000		25200	7900		25205.6	14800
		25558	8280		31253.5	4590		30657	165000		25200.3	8150		25205.9	13800
		25559	7780		31253.6	4590		30658	155000		25200.6	8550		25206.2	13100
		25560	6770		31253.7	4580		30659	160000		25201	9110		25206.6	12700
		25561	5800		31253.8	4570		30660	214000		25201.3	9840		25206.9	12700
		25562	5230		31253.9	4560		30661	268000		25201.6	10800		25207.2	12800
		25563	5040		31254	4550		30662	237000		25202	11800		25207.6	13000
		25564	5220		31254.1	4540		30663	188000		25202.3	13100		25207.9	13400
		25565	5860		31254.2	4520		30664	173000		25202.6	14500		25208.2	13900
		25566	6960		31254.3	4510		30665	173000		25203	16100		25208.6	14900
		25567	7970		31254.4	4490		30666	218000		25203.3	17500		25208.9	16800
		25568	8100		31254.5	4470		30667	262000		25203.6	18900		25209.2	19600
		25569	7210		31254.6	4450		30668	233000		25203.9	20000		25209.6	23000
		25570	5950		31254.7	4430		30669	202000		25204.3	20700		25209.9	25900
		25571	4910		31254.8	4410		30670	204000		25204.6	21000		25210.2	27000
		25572	4330		31254.9	4390		30671	205000		25204.9	20800		25210.5	26000
		25573	4380		31255	4360		30672	189000		25205.3	20300		25210.9	23700
		25574	5570		31255.1	4340		30673	156000		25205.6	19600		25211.2	21000
		25575	8570		31255.2	4310		30674	129000		25205.9	18800		25211.5	19000
		25576	12600		31255.3	4290		30675	120000		25206.2	18000		25211.9	17600
		25577	14800		31255.4	4260		30676	127000		25206.6	17400		25212.2	16600
		25578	13800		31255.5	4230		30677	146000		25206.9	16900		25212.5	15800
		25579	11500		31255.6	4200		30678	170000		25207.2	16700		25212.8	14900
		25580	9780		31255.7	4170		30679	194000		25207.6	16600		25213.2	13900
		25581	8590		31255.8	4140		30680	218000		25207.9	16600		25213.5	13000
		25582	7430		31255.9	4110		30681	235000		25208.2	16600		25213.8	12400
		25583	6210		31256	4080		30682	238000		25208.6	16700		25214.2	12300
		25584	5070		31256.1	4050		30683	229000		25208.9	16700		25214.5	12400
		25585	4210		31256.2	4020		30684	246000		25209.2	16700		25214.8	12200
		25586	3790		31256.3	3990		30685	260000		25209.6	16700		25215.2	11400
		25587	3870		31256.4	3960		30686	208000		25209.9	16800		25215.5	10600
		25588	4410		31256.5	3930		30687	161000		25210.2	17000		25215.8	10500
		25589	5330		31256.6	3900		30688	163000		25210.5	17100		25216.2	11100
		25590	6570		31256.7	3860		30689	178000		25210.9	17100		25216.5	12300
		25591	8160		31256.8	3830		30690	188000		25211.2	16800		25216.8	13800
		25592	9920		31256.9	3800		30691	191000		25211.5	16200		25217.1	15400
		25593	11100		31257	3780		30692	194000		25211.9	15400		25217.5	16800
		25594	10900		31257.1	3750		30693	201000		25212.2	14500		25217.8	17900
		25595	9210		31257.2	3720		30694	207000		25212.5	13600		25218.1	18900
		25596	7140		31257.3	3690		30695	213000		25212.8	12900		25218.5	20100
		25597	5600		31257.4	3660		30696	223000		25213.2	12200		25218.8	21200
		25598	4790		31257.5	3630		30697	234000		25213.5	11700		25219.1	22200
		25599	4640		31257.6	3610		30698	219000		25213.8	11200		25219.5	22800
		25600	5160		31257.7	3580		30699	185000		25214.2	10700		25219.8	23300
		25601	6230		31257.8	3560		30700	174000		25214.5	10300		25220.1	23500
		25602	7140		31257.9	3530		30701	194000		25214.8	9880		25220.4	23400
		25603	7270		31258	3510		30702	221000		25215.2	9570		25220.8	22800
		25604	6950		31258.1	3490		30703	219000		25215.5	9370		25221.1	21900
		25605	6810		31258.2	3460		30704	200000		25215.8	9320		25221.4	20700
		25606	7030		31258.3	3440		30705	189000		25216.2	9450		25221.8	19600
		25607	7510		31258.4	3420		30706	184000		25216.5	9770		25222.1	18800
		25608	7920		31258.5	3400		30707	180000		25216.8	10300		25222.4	18000
		25609	7890		31258.6	3390		30708	177000		25217.1	10900		25222.8	17100
		25610	7310		31258.7	3370		30709	183000		25217.5	11600		25223.1	15700
		25611	6550		31258.8	3350		30710	203000		25217.8	12500		25223.4	14100
		25612	6060		31258.9	3340		30711	217000		25218.1	13500		25223.7	12400
		25613	5850		31259	3330		30712	211000		25218.5	14500		25224.1	10900
		25614	5640		31259.1	3310		30713	201000		25218.8	15700		25224.4	9580
		25615	5420		31259.2	3300		30714	188000		25219.1	16900		25224.7	8640
		25616	5500		31259.3	3290		30715	175000		25219.5	18200		25225.1	8020
		25617	6030		31259.4	3280		30716	173000		25219.8	19400		25225.4	7660
		25618	6780		31259.5	3280		30717	179000		25220.1	20400		25225.7	7530
		25619	7470		31259.6	3270		30718	184000		25220.4	21200		25226.1	7580
		25620	8060		31259.7	3270		30719	186000		25220.8	21800		25226.4	7780
		25621	8460		31259.8	3260		30720	188000		25221.1	21900		25226.7	8090
		25622	8330		31259.9	3260		30721	199000		25221.4	21700		25227	8450
		25623	7720		31260	3260		30722	213000		25221.8	21000		25227.4	8860
		25624	7180		31260.1	3260		30723	237000		25222.1	20000		25227.7	9360
		25625	6990		31260.2	3260		30724	268000		25222.4	18700		25228	10000
		25626	6800		31260.3	3260		30725	268000		25222.8	17200		25228.4	10800
		25627	5980		31260.4	3270		30726	234000		25223.1	15700		25228.7	11600
		25628	4620		31260.5	3270		30727	207000		25223.4	14200		25229	12300
		25629	3560		31260.6	3280		30728	200000		25223.7	12900		25229.3	12700
		25630	3420		31260.7	3280		30729	196000		25224.1	11700		25229.7	12800
		25631	4230		31260.8	3290		30730	231000		25224.4	10800		25230	12700
		25632	5680		31260.9	3300		30731	270000		25224.7	10100		25230.3	12500
		25633	6990		31261	3310		30732	230000		25225.1	9590		25230.7	12200
		25634	7510		31261.1	3320		30733	205000		25225.4	9250		25231	12000
		25635	7630		31261.2	3330		30734	209000		25225.7	9010		25231.3	11800
		25636	8490		31261.3	3340		30735	182000		25226.1	8820		25231.7	11700
		25637	10700		31261.4	3350		30736	170000		25226.4	8660		25232	11700
		25638	13700		31261.5	3360		30737	174000		25226.7	8540		25232.3	11700
		25639	15900		31261.6	3370		30738	170000		25227	8490		25232.7	11600
		25640	15900		31261.7	3380		30739	170000		25227.4	8510		25233	11500
		25641	13800		31261.8	3400		30740	178000		25227.7	8620		25233.3	11400
		25642	11200		31261.9	3410		30741	186000		25228	8780		25233.6	11400
		25643	8890		31262	3420		30742	187000		25228.4	8970		25234	11400
		25644	7050		31262.1	3440		30743	186000		25228.7	9180		25234.3	11600
		25645	5580		31262.2	3450		30744	181000		25229	9400		25234.6	11700
		25646	4540		31262.3	3470		30745	172000		25229.3	9650		25235	11800
		25647	3910		31262.4	3480		30746	169000		25229.7	9930		25235.3	11800
		25648	3590		31262.5	3490		30747	178000		25230	10200		25235.6	11700
		25649	3630		31262.6	3510		30748	193000		25230.3	10600		25236	11600
		25650	4090		31262.7	3520		30749	202000		25230.7	10900		25236.3	11500
		25651	4950		31262.8	3540		30750	202000		25231	11200		25236.6	11400
		25652	6320		31262.9	3550		30751	200000		25231.3	11400		25236.9	11400
		25653	8330		31263	3570		30752	196000		25231.7	11600		25237.3	11500
		25654	10700		31263.1	3580		30753	186000		25232	11700		25237.6	11800
		25655	12700		31263.2	3590		30754	170000		25232.3	11800		25237.9	12000
		25656	13300		31263.3	3610		30755	158000		25232.7	11900		25238.3	12100
		25657	12300		31263.4	3620		30756	152000		25233	12000		25238.6	11900
		25658	10200		31263.5	3630		30757	150000		25233.3	12200		25238.9	11400
		25659	7810		31263.6	3650		30758	165000		25233.6	12400		25239.2	10900
		25660	5800		31263.7	3660		30759	209000		25234	12700		25239.6	10300
		25661	4430		31263.8	3670		30760	234000		25234.3	13000		25239.9	9870
		25662	3720		31263.9	3680		30761	229000		25234.6	13400		25240.2	9470
		25663	3650		31264	3700		30762	236000		25235	13800		25240.6	9110
		25664	4180		31264.1	3710		30763	244000		25235.3	14200		25240.9	8750
		25665	5140		31264.2	3720		30764	245000		25235.6	14600		25241.2	8450
		25666	6350		31264.3	3730		30765	244000		25236	15000		25241.6	8290
		25667	7720		31264.4	3740		30766	231000		25236.3	15400		25241.9	8360
		25668	9060		31264.5	3740		30767	212000		25236.6	15800		25242.2	8640
		25669	10000		31264.6	3750		30768	192000		25236.9	16000		25242.6	8990
		25670	10300		31264.7	3760		30769	175000		25237.3	15900		25242.9	9250
		25671	9750		31264.8	3760		30770	167000		25237.6	15700		25243.2	9430
		25672	8720		31264.9	3770		30771	166000		25237.9	15200		25243.5	9640
		25673	7440		31265	3770		30772	168000		25238.3	14600		25243.9	9990
		25674	6170		31265.1	3780		30773	169000		25238.6	13900		25244.2	10400
		25675	5120		31265.2	3780		30774	170000		25238.9	13200		25244.5	11000
		25676	4370		31265.3	3780		30775	172000		25239.2	12500		25244.9	11800
		25677	3820		31265.4	3780		30776	176000		25239.6	11900		25245.2	13900
		25678	3550		31265.5	3780		30777	176000		25239.9	11400		25245.5	20100
		25679	3730		31265.6	3780		30778	171000		25240.2	10900		25245.8	32800
		25680	4510		31265.7	3770		30779	171000		25240.6	10400		25246.2	50500
		25681	5830		31265.8	3770		30780	179000		25240.9	9930		25246.5	66600
		25682	7380		31265.9	3760		30781	190000		25241.2	9510		25246.8	74900
		25683	8710		31266	3760		30782	205000		25241.6	9140		25247.2	74500
		25684	9540		31266.1	3750		30783	218000		25241.9	8850		25247.5	66500
		25685	9690		31266.2	3740		30784	213000		25242.2	8640		25247.8	52700
		25686	9180		31266.3	3730		30785	202000		25242.6	8500		25248.2	37200
		25687	8340		31266.4	3720		30786	193000		25242.9	8450		25248.5	25300
		25688	7610		31266.5	3710		30787	180000		25243.2	8530		25248.8	18900
		25689	7070		31266.6	3700		30788	176000		25243.5	8820		25249.2	16700
		25690	6540		31266.7	3680		30789	176000		25243.9	9470		25249.5	16300
		25691	6040		31266.8	3670		30790	168000		25244.2	10600		25249.8	16400
		25692	5870		31266.9	3650		30791	164000		25244.5	12500		25250.1	16700
		25693	6430		31267	3640		30792	170000		25244.9	15100		25250.5	17000
		25694	8420		31267.1	3620		30793	182000		25245.2	18300		25250.8	17100
		25695	11700		31267.2	3600		30794	212000		25245.5	21900		25251.1	16700
		25696	13700		31267.3	3590		30795	234000		25245.8	25300		25251.5	15900
		25697	12300		31267.4	3570		30796	203000		25246.2	27800		25251.8	14900
		25698	9170		31267.5	3550		30797	166000		25246.5	29000		25252.1	13900
		25699	6500		31267.6	3530		30798	166000		25246.8	28800		25252.5	13200
		25700	4720		31267.7	3510		30799	181000		25247.2	27100		25252.8	12700
		25701	3590		31267.8	3490		30800	188000		25247.5	24600		25253.1	12500
		25702	3070		31267.9	3480		30801	183000		25247.8	21800		25253.4	12700
		25703	3120		31268	3460		30802	182000		25248.2	19200		25253.8	13500
		25704	3670		31268.1	3440		30803	194000		25248.5	17300		25254.1	14700
		25705	4670		31268.2	3420		30804	206000		25248.8	16000		25254.4	15500
		25706	6160		31268.3	3400		30805	200000		25249.2	15400		25254.8	15200
		25707	8100		31268.4	3380		30806	176000		25249.5	15300		25255.1	14100
		25708	10400		31268.5	3360		30807	153000		25249.8	15400		25255.4	12900
		25709	13000		31268.6	3340		30808	148000		25250.1	15400		25255.8	11600
		25710	16100		31268.7	3330		30809	182000		25250.5	15300		25256.1	10200
		25711	17700		31268.8	3310		30810	222000		25250.8	15000		25256.4	8770
		25712	15900		31268.9	3290		30811	213000		25251.1	14500		25256.7	7510
		25713	11600		31269	3280		30812	197000		25251.5	14000		25257.1	6520
		25714	7560		31269.1	3260		30813	240000		25251.8	13600		25257.4	5790
		25715	5110		31269.2	3240		30814	285000		25252.1	13300		25257.7	5310
		25716	4100		31269.3	3230		30815	245000		25252.5	13100		25258.1	5050
		25717	4030		31269.4	3210		30816	186000		25252.8	13000		25258.4	4980
		25718	4260		31269.5	3200		30817	171000		25253.1	12900		25258.7	5090
		25719	4230		31269.6	3180		30818	175000		25253.4	12700		25259.1	5400
		25720	3850		31269.7	3170		30819	182000		25253.8	12200		25259.4	5910
		25721	3450		31269.8	3160		30820	179000		25254.1	11700		25259.7	6670
		25722	3550		31269.9	3150		30821	169000		25254.4	11100		25260	7750
		25723	4580		31270	3130		30822	163000		25254.8	10600		25260.4	9240
		25724	6770		31270.1	3120		30823	167000		25255.1	10300		25260.7	11200
		25725	9980		31270.2	3110		30824	164000		25255.4	10100		25261	13700
		25726	13200		31270.3	3100		30825	168000		25255.8	9980		25261.4	16500
		25727	14900		31270.4	3090		30826	182000		25256.1	9930		25261.7	19300
		25728	14000		31270.5	3080		30827	178000		25256.4	9870		25262	21800
		25729	11600		31270.6	3070		30828	170000		25256.7	9760		25262.3	23900
		25730	8910		31270.7	3060		30829	174000		25257.1	9600		25262.7	25500
		25731	6800		31270.8	3050		30830	183000		25257.4	9380		25263	26300
		25732	5360		31270.9	3040		30831	191000		25257.7	9130		25263.3	26300
		25733	4470		31271	3040		30832	196000		25258.1	8880		25263.7	25300
		25734	3960		31271.1	3030		30833	206000		25258.4	8630		25264	23600
		25735	3710		31271.2	3020		30834	215000		25258.7	8400		25264.3	21500
		25736	3750		31271.3	3010		30835	207000		25259.1	8220		25264.7	19300
		25737	4150		31271.4	3010		30836	186000		25259.4	8080		25265	17500
		25738	4960		31271.5	3000		30837	169000		25259.7	7990		25265.3	16100
		25739	6210		31271.6	3000		30838	162000		25260	7970		25265.7	15200
		25740	8120		31271.7	2990		30839	168000		25260.4	8010		25266	14500
		25741	10700		31271.8	2990		30840	181000		25260.7	8140		25266.3	14000
		25742	13300		31271.9	2980		30841	185000		25261	8370		25266.6	13600
		25743	14600		31272	2980		30842	188000		25261.4	8690		25267	13400
		25744	14000		31272.1	2980		30843	202000		25261.7	9080		25267.3	13300
		25745	11900		31272.2	2970		30844	219000		25262	9520		25267.6	13400
		25746	9390		31272.3	2970		30845	227000		25262.3	9960		25268	13600
		25747	7360		31272.4	2970		30846	218000		25262.7	10300		25268.3	13700
		25748	6020		31272.5	2970		30847	201000		25263	10600		25268.6	13700
		25749	5120		31272.6	2980		30848	181000		25263.3	10800		25269	13400
		25750	4360		31272.7	2980		30849	168000		25263.7	10900		25269.3	13000
		25751	3710		31272.8	2980		30850	168000		25264	10900		25269.6	12600
		25752	3350		31272.9	2990		30851	184000		25264.3	10800		25269.9	12200
		25753	3410		31273	2990		30852	206000		25264.7	10700		25270.3	11900
		25754	3900		31273.1	3000		30853	226000		25265	10600		25270.6	11900
		25755	4830		31273.2	3010		30854	243000		25265.3	10500		25270.9	12100
		25756	6230		31273.3	3020		30855	232000		25265.7	10400		25271.3	12500
		25757	8040		31273.4	3030		30856	194000		25266	10400		25271.6	13100
		25758	10200		31273.5	3040		30857	174000		25266.3	10300		25271.9	13700
		25759	12500		31273.6	3050		30858	200000		25266.6	10300		25272.2	14400
		25760	14400		31273.7	3070		30859	233000		25267	10300		25272.6	14900
		25761	14600		31273.8	3080		30860	227000		25267.3	10300		25272.9	15100
		25762	12500		31273.9	3100		30861	209000		25267.6	10300		25273.2	14900
		25763	9350		31274	3120		30862	195000		25268	10300		25273.6	14100
		25764	6540		31274.1	3130		30863	179000		25268.3	10300		25273.9	12700
		25765	4810		31274.2	3150		30864	168000		25268.6	10200		25274.2	11300
		25766	4010		31274.3	3170		30865	169000		25269	10100		25274.6	10000
		25767	3740		31274.4	3190		30866	188000		25269.3	9850		25274.9	8990
		25768	3650		31274.5	3220		30867	211000		25269.6	9580		25275.2	8190
		25769	3550		31274.6	3240		30868	234000		25269.9	9250		25275.6	7630
		25770	3520		31274.7	3260		30869	251000		25270.3	8880		25275.9	7310
		25771	3700		31274.8	3290		30870	227000		25270.6	8500		25276.2	7260
		25772	4210		31274.9	3310		30871	188000		25270.9	8140		25276.5	7490
		25773	5240		31275	3330		30872	167000		25271.3	7830		25276.9	8030
		25774	7030		31275.1	3360		30873	158000		25271.6	7560		25277.2	8840
		25775	9150		31275.2	3390		30874	164000		25271.9	7360		25277.5	9890
		25776	10600		31275.3	3410		30875	187000		25272.2	7190		25277.9	11100
		25777	11000		31275.4	3440		30876	210000		25272.6	7050		25278.2	12500
		25778	10600		31275.5	3470		30877	212000		25272.9	6930		25278.5	14100
		25779	9410		31275.6	3500		30878	194000		25273.2	6830		25278.8	15900
		25780	7440		31275.7	3520		30879	177000		25273.6	6780		25279.2	17700
		25781	5580		31275.8	3550		30880	184000		25273.9	6810		25279.5	19500
		25782	4450		31275.9	3580		30881	204000		25274.2	6910		25279.8	21000
		25783	3980		31276	3610		30882	206000		25274.6	7090		25280.2	21700
		25784	4010		31276.1	3640		30883	207000		25274.9	7350		25280.5	21300
		25785	4640		31276.2	3670		30884	214000		25275.2	7690		25280.8	19900
		25786	5790		31276.3	3700		30885	229000		25275.6	8100		25281.2	18100
		25787	6730		31276.4	3730		30886	227000		25275.9	8560		25281.5	16300
		25788	6950		31276.5	3760		30887	188000		25276.2	9070		25281.8	14800
		25789	6930		31276.6	3800		30888	154000		25276.5	9590		25282.2	13500
		25790	7220		31276.7	3830		30889	146000		25276.9	10100		25282.5	12600
		25791	7730		31276.8	3860		30890	158000		25277.2	10600		25282.8	12100
		25792	8200		31276.9	3890		30891	189000		25277.5	11100		25283.1	12100
		25793	8620		31277	3930		30892	225000		25277.9	11600		25283.5	12800
		25794	8930		31277.1	3960		30893	251000		25278.2	11900		25283.8	14400
		25795	8770		31277.2	4000		30894	264000		25278.5	12200		25284.1	16900
		25796	7960		31277.3	4030		30895	271000		25278.8	12400		25284.5	20100
		25797	6870		31277.4	4060		30896	249000		25279.2	12500		25284.8	23300
		25798	6030		31277.5	4100		30897	203000		25279.5	12600		25285.1	25300
		25799	5760		31277.6	4130		30898	174000		25279.8	12500		25285.5	25100
		25800	6020		31277.7	4170		30899	166000		25280.2	12400		25285.8	22600
		25801	6540		31277.8	4200		30900	164000		25280.5	12400		25286.1	19400
		25802	6970		31277.9	4230		30901	171000		25280.8	12300		25286.4	17100
		25803	7170		31278	4270		30902	181000		25281.2	12400		25286.8	17000
		25804	7230		31278.1	4300		30903	186000		25281.5	12500		25287.1	19400
		25805	7400		31278.2	4340		30904	190000		25281.8	12800		25287.4	24400
		25806	7650		31278.3	4370		30905	196000		25282.2	13000		25287.8	30800
		25807	7670		31278.4	4400		30906	204000		25282.5	13400		25288.1	36200
		25808	7320		31278.5	4440		30907	215000		25282.8	13800		25288.4	38300
		25809	6840		31278.6	4470		30908	222000		25283.1	14300		25288.8	36100
		25810	6430		31278.7	4500		30909	206000		25283.5	14800		25289.1	31100
		25811	6080		31278.8	4540		30910	168000		25283.8	15400		25289.4	25500
		25812	5750		31278.9	4570		30911	133000		25284.1	16000		25289.7	21200
		25813	5420		31279	4600		30912	118000		25284.5	16600		25290.1	18200
		25814	5200		31279.1	4640		30913	124000		25284.8	17200		25290.4	16300
		25815	5200		31279.2	4670		30914	150000		25285.1	17700		25290.7	14900
		25816	5390		31279.3	4700		30915	189000		25285.5	18300		25291.1	13700
		25817	5580		31279.4	4730		30916	222000		25285.8	19000		25291.4	12500
		25818	5710		31279.5	4760		30917	235000		25286.1	19800		25291.7	11200
		25819	5860		31279.6	4790		30918	225000		25286.4	20600		25292.1	9950
		25820	6080		31279.7	4820		30919	202000		25286.8	21400		25292.4	8950
		25821	6320		31279.8	4850		30920	177000		25287.1	22100		25292.7	8200
		25822	6420		31279.9	4880		30921	163000		25287.4	22700		25293	7650
		25823	6510		31280	4910		30922	166000		25287.8	23100		25293.4	7280
		25824	6920		31280.1	4940		30923	197000		25288.1	23100		25293.7	7100
		25825	7670		31280.2	4960		30924	228000		25288.4	22900		25294	7090
		25826	8270		31280.3	4990		30925	212000		25288.8	22400		25294.4	7260
		25827	8130		31280.4	5010		30926	186000		25289.1	21900		25294.7	7630
		25828	7250		31280.5	5030		30927	179000		25289.4	21300		25295	8220
		25829	6210		31280.6	5050		30928	175000		25289.7	20600		25295.3	9000
		25830	5630		31280.7	5070		30929	175000		25290.1	19900		25295.7	9830
		25831	6040		31280.8	5080		30930	180000		25290.4	19000		25296	10600
		25832	7760		31280.9	5100		30931	188000		25290.7	18000		25296.3	11600
		25833	10200		31281	5110		30932	196000		25291.1	16900		25296.7	13500
		25834	11500		31281.1	5120		30933	196000		25291.4	15800		25297	16300
		25835	10800		31281.2	5130		30934	187000		25291.7	14700		25297.3	18100
		25836	9330		31281.3	5130		30935	173000		25292.1	13600		25297.7	18000
		25837	8240		31281.4	5140		30936	160000		25292.4	12600		25298	17000
		25838	7630		31281.5	5140		30937	152000		25292.7	11700		25298.3	16900
		25839	7180		31281.6	5140		30938	150000		25293	11000		25298.7	18000
		25840	6800		31281.7	5140		30939	155000		25293.4	10400		25299	19600
		25841	6560		31281.8	5130		30940	166000		25293.7	9960		25299.3	21400
		25842	6570		31281.9	5130		30941	183000		25294	9630		25299.6	23000
		25843	6950		31282	5120		30942	195000		25294.4	9420		25300	24300
		25844	7590		31282.1	5120		30943	199000		25294.7	9390		25300.3	25300
		25845	8020		31282.2	5110		30944	207000		25295	9630		25300.6	25400
		25846	7910		31282.3	5100		30945	222000		25295.3	10200		25301	24600
		25847	7430		31282.4	5090		30946	223000		25295.7	11000		25301.3	23100
		25848	6920		31282.5	5080		30947	210000		25296	12100		25301.6	21700
		25849	6600		31282.6	5070		30948	201000		25296.3	13200		25302	22100
		25850	6530		31282.7	5050		30949	196000		25296.7	14000		25302.3	30500
		25851	6700		31282.8	5040		30950	198000		25297	14500		25302.6	57400
		25852	7040		31282.9	5020		30951	195000		25297.3	14500		25302.9	101000
		25853	7430		31283	5010		30952	173000		25297.7	14100		25303.3	131000
		25854	7820		31283.1	4990		30953	158000		25298	13700		25303.6	117000
		25855	8210		31283.2	4970		30954	160000		25298.3	13500		25303.9	72100
		25856	8540		31283.3	4950		30955	170000		25298.7	13500		25304.3	32100
		25857	8630		31283.4	4930		30956	191000		25299	13900		25304.6	12700
		25858	8210		31283.5	4910		30957	210000		25299.3	14400		25304.9	6870
		25859	7210		31283.6	4880		30958	212000		25299.6	15000		25305.2	5590
		25860	6010		31283.7	4860		30959	196000		25300	15700		25305.6	5260
		25861	5160		31283.8	4840		30960	178000		25300.3	16300		25305.9	5140
		25862	5060		31283.9	4810		30961	169000		25300.6	16900		25306.2	5110
		25863	5940		31284	4790		30962	163000		25301	17600		25306.6	5180
		25864	7580		31284.1	4760		30963	162000		25301.3	18700		25306.9	5350
		25865	9180		31284.2	4730		30964	173000		25301.6	20600		25307.2	5640
		25866	9920		31284.3	4710		30965	184000		25302	23400		25307.6	6040
		25867	9740		31284.4	4680		30966	188000		25302.3	27000		25307.9	6580
		25868	9090		31284.5	4650		30967	183000		25302.6	31100		25308.2	7270
		25869	8240		31284.6	4620		30968	176000		25302.9	34800		25308.6	8200
		25870	7260		31284.7	4590		30969	175000		25303.3	37000		25308.9	9400
		25871	6350		31284.8	4570		30970	179000		25303.6	37000		25309.2	10800
		25872	5850		31284.9	4540		30971	182000		25303.9	34800		25309.5	12400
		25873	5920		31285	4510		30972	181000		25304.3	31000		25309.9	13800
		25874	6480		31285.1	4480		30973	177000		25304.6	26500		25310.2	15000
		25875	7310		31285.2	4450		30974	172000		25304.9	22200		25310.5	15800
		25876	8080		31285.3	4420		30975	163000		25305.2	18800		25310.9	16300
		25877	8540		31285.4	4400		30976	158000		25305.6	16500		25311.2	16500
		25878	8700		31285.5	4370		30977	166000		25305.9	14900		25311.5	16600
		25879	8620		31285.6	4340		30978	207000		25306.2	14100		25311.8	16600
		25880	8030		31285.7	4310		30979	253000		25306.6	13500		25312.2	16600
		25881	6840		31285.8	4280		30980	248000		25306.9	13200		25312.5	16700
		25882	5610		31285.9	4260		30981	217000		25307.2	12900		25312.8	16900
		25883	4920		31286	4230		30982	202000		25307.6	12500		25313.2	17300
		25884	5110		31286.1	4200		30983	189000		25307.9	12200		25313.5	17400
		25885	6280		31286.2	4170		30984	173000		25308.2	11800		25313.8	17100
		25886	8250		31286.3	4140		30985	167000		25308.6	11400		25314.2	16100
		25887	9980		31286.4	4110		30986	168000		25308.9	11000		25314.5	14700
		25888	10200		31286.5	4090		30987	169000		25309.2	10600		25314.8	13100
		25889	8720		31286.6	4060		30988	176000		25309.5	10200		25315.2	11800
		25890	6950		31286.7	4030		30989	192000		25309.9	9860		25315.5	10700
		25891	5790		31286.8	4000		30990	211000		25310.2	9560		25315.8	10100
		25892	5380		31286.9	3970		30991	221000		25310.5	9280		25316.1	9680
		25893	5530		31287	3950		30992	214000		25310.9	9020		25316.5	9470
		25894	6080		31287.1	3920		30993	194000		25311.2	8790		25316.8	9370
		25895	7040		31287.2	3890		30994	173000		25311.5	8600		25317.1	9370
		25896	8270		31287.3	3870		30995	158000		25311.8	8470		25317.5	9490
		25897	9020		31287.4	3840		30996	150000		25312.2	8390		25317.8	9750
		25898	8560		31287.5	3820		30997	145000		25312.5	8390		25318.1	10200
		25899	7210		31287.6	3790		30998	148000		25312.8	8470		25318.5	10800
		25900	5980		31287.7	3770		30999	165000		25313.2	8650		25318.8	11700
		25901	5420		31287.8	3750		31000	188000		25313.5	8940		25319.1	12900
		25902	5460		31287.9	3720		31001	198000		25313.8	9340		25319.4	14400
		25903	5900		31288	3700		31002	191000		25314.2	9870		25319.8	16200
		25904	6690		31288.1	3680		31003	181000		25314.5	10500		25320.1	18200
		25905	7710		31288.2	3660		31004	174000		25314.8	11300		25320.4	20200
		25906	8660		31288.3	3650		31005	177000		25315.2	12100		25320.8	21700
		25907	9350		31288.4	3630		31006	187000		25315.5	12900		25321.1	22100
		25908	9760		31288.5	3610		31007	200000		25315.8	13600		25321.4	21400
		25909	9710		31288.6	3600		31008	213000		25316.1	14300		25321.8	19800
		25910	9060		31288.7	3580		31009	211000		25316.5	14800		25322.1	17900
		25911	8310		31288.8	3570		31010	194000		25316.8	15100		25322.4	15900
		25912	8280		31288.9	3560		31011	181000		25317.1	15300		25322.7	13800
		25913	8880		31289	3540		31012	179000		25317.5	15300		25323.1	11800
		25914	9090		31289.1	3530		31013	187000		25317.8	15200		25323.4	10100
		25915	8510		31289.2	3520		31014	194000		25318.1	15000		25323.7	8850
		25916	7740		31289.3	3510		31015	188000		25318.5	14700		25324.1	8150
		25917	7240		31289.4	3500		31016	171000		25318.8	14300		25324.4	7860
		25918	7000		31289.5	3490		31017	156000		25319.1	14000		25324.7	7900
		25919	6970		31289.6	3480		31018	156000		25319.4	13800		25325.1	8240
		25920	6990		31289.7	3470		31019	183000		25319.8	13600		25325.4	8910
		25921	6740		31289.8	3460		31020	225000		25320.1	13500		25325.7	9960
		25922	6060		31289.9	3450		31021	256000		25320.4	13400		25326	11500
		25923	5090		31290	3450		31022	265000		25320.8	13300		25326.4	13600
		25924	4110		31290.1	3440		31023	253000		25321.1	13200		25326.7	16300
		25925	3310		31290.2	3430		31024	221000		25321.4	13100		25327	19600
		25926	2850		31290.3	3430		31025	179000		25321.8	12900		25327.4	22700
		25927	2960		31290.4	3420		31026	150000		25322.1	12700		25327.7	25100
		25928	4050		31290.5	3410		31027	140000		25322.4	12500		25328	26200
		25929	6560		31290.6	3410		31028	141000		25322.7	12300		25328.3	25600
		25930	9800		31290.7	3400		31029	147000		25323.1	12100		25328.7	23900
		25931	11800		31290.8	3400		31030	157000		25323.4	12000		25329	21500
		25932	12000		31290.9	3400		31031	171000		25323.7	11900		25329.3	19100
		25933	11400		31291	3390		31032	195000		25324.1	11800		25329.7	16800
		25934	10800		31291.1	3390		31033	261000		25324.4	11500		25330	14800
		25935	10300		31291.2	3390		31034	317000		25324.7	11200		25330.3	12900
		25936	10500		31291.3	3390		31035	282000		25325.1	10700		25330.7	11300
		25937	11800		31291.4	3380		31036	226000		25325.4	10200		25331	9940
		25938	12800		31291.5	3380		31037	195000		25325.7	9650		25331.3	8900
		25939	12100		31291.6	3380		31038	175000		25326	9110		25331.7	8190
		25940	9840		31291.7	3380		31039	175000		25326.4	8610		25332	7800
		25941	7430		31291.8	3380		31040	180000		25326.7	8160		25332.3	7720
		25942	5930		31291.9	3380		31041	178000		25327	7790		25332.6	7940
		25943	5360		31292	3380		31042	173000		25327.4	7490		25333	8460
		25944	5710		31292.1	3380		31043	168000		25327.7	7280		25333.3	9280
		25945	7010		31292.2	3380		31044	162000		25328	7140		25333.6	10400
		25946	8590		31292.3	3380		31045	161000		25328.3	7050		25334	11900
		25947	9480		31292.4	3380		31046	168000		25328.7	7030		25334.3	13700
		25948	9200		31292.5	3380		31047	178000		25329	7050		25334.6	15600
		25949	8150		31292.6	3380		31048	194000		25329.3	7100		25335	17200
		25950	7130		31292.7	3370		31049	213000		25329.7	7170		25335.3	18400
		25951	6830		31292.8	3370		31050	220000		25330	7280		25335.6	18900
		25952	7530		31292.9	3370		31051	209000		25330.3	7420		25335.9	18800
		25953	9200		31293	3370		31052	191000		25330.7	7600		25336.3	18200
		25954	11400		31293.1	3370		31053	181000		25331	7840		25336.6	17200
		25955	13000		31293.2	3360		31054	187000		25331.3	8140		25336.9	16000
		25956	13200		31293.3	3360		31055	199000		25331.7	8520		25337.3	14800
		25957	11900		31293.4	3360		31056	205000		25332	8980		25337.6	13700
		25958	9930		31293.5	3350		31057	202000		25332.3	9520		25337.9	12900
		25959	8200		31293.6	3350		31058	183000		25332.6	10100		25338.2	12500
		25960	7150		31293.7	3350		31059	166000		25333	10800		25338.6	12300
		25961	6850		31293.8	3340		31060	177000		25333.3	11500		25338.9	12400
		25962	7090		31293.9	3340		31061	206000		25333.6	12300		25339.2	12500
		25963	7510		31294	3340		31062	228000		25334	12900		25339.6	12500
		25964	7700		31294.1	3330		31063	238000		25334.3	13500		25339.9	12300
		25965	7500		31294.2	3330		31064	231000		25334.6	14000		25340.2	11900
		25966	7150		31294.3	3320		31065	215000		25335	14500		25340.6	11400
		25967	6970		31294.4	3320		31066	198000		25335.3	14800		25340.9	11200
		25968	7060		31294.5	3320		31067	179000		25335.6	15000		25341.2	11600
		25969	7260		31294.6	3310		31068	164000		25335.9	15100		25341.6	12600
		25970	7570		31294.7	3310		31069	157000		25336.3	14900		25341.9	13400
		25971	8150		31294.8	3310		31070	160000		25336.6	14500		25342.2	13200
		25972	8970		31294.9	3300		31071	172000		25336.9	14000		25342.5	12700
		25973	9730		31295	3300		31072	182000		25337.3	13200		25342.9	12600
		25974	10100		31295.1	3300		31073	185000		25337.6	12500		25343.2	12600
		25975	10100		31295.2	3300		31074	184000		25337.9	11700		25343.5	12500
		25976	9900		31295.3	3290		31075	179000		25338.2	11000		25343.9	12100
		25977	9620		31295.4	3290		31076	170000		25338.6	10600		25344.2	11800
		25978	9160		31295.5	3290		31077	172000		25338.9	10300		25344.5	11600
		25979	8350		31295.6	3290		31078	208000		25339.2	10400		25344.8	11400
		25980	7350		31295.7	3290		31079	243000		25339.6	10700		25345.2	11200
		25981	6440		31295.8	3290		31080	229000		25339.9	11300		25345.5	11100
		25982	5690		31295.9	3290		31081	197000		25340.2	12000		25345.8	11200
		25983	5070		31296	3290		31082	183000		25340.6	12500		25346.2	11300
		25984	4590		31296.1	3290		31083	175000		25340.9	12700		25346.5	11600
		25985	4360		31296.2	3290		31084	167000		25341.2	12600		25346.8	11900
		25986	4440		31296.3	3290		31085	163000		25341.6	12100		25347.2	12300
		25987	4800		31296.4	3290		31086	159000		25341.9	11400		25347.5	12800
		25988	5330		31296.5	3290		31087	193000		25342.2	10600		25347.8	13600
		25989	5950		31296.6	3290		31088	239000		25342.5	9880		25348.2	14600
		25990	6630		31296.7	3290		31089	226000		25342.9	9210		25348.5	15700
		25991	7440		31296.8	3290		31090	216000		25343.2	8630		25348.8	16800
		25992	8230		31296.9	3300		31091	228000		25343.5	8140		25349.1	17700
		25993	8650		31297	3300		31092	227000		25343.9	7710		25349.5	18200
		25994	8490		31297.1	3300		31093	224000		25344.2	7360		25349.8	18200
		25995	7880		31297.2	3310		31094	218000		25344.5	7120		25350.1	17800
		25996	7210		31297.3	3310		31095	196000		25344.8	7030		25350.5	17200
		25997	6740		31297.4	3320		31096	168000		25345.2	7110		25350.8	16800
		25998	6380		31297.5	3320		31097	156000		25345.5	7340		25351.1	16500
		25999	5800		31297.6	3330		31098	158000		25345.8	7690		25351.5	16300
		26000	4970		31297.7	3330		31099	166000		25346.2	8120		25351.8	16300
		26001	4280		31297.8	3340		31100	176000		25346.5	8610		25352.1	16400
		26002	3970		31297.9	3350		31101	189000		25346.8	9140		25352.4	16500
		26003	3960		31298	3350		31102	193000		25347.2	9710		25352.8	16800
		26004	4090		31298.1	3360		31103	181000		25347.5	10300		25353.1	17200
		26005	4270		31298.2	3370		31104	170000		25347.8	10900		25353.4	17800
		26006	4540		31298.3	3380		31105	175000		25348.2	11400		25353.8	18500
		26007	5040		31298.4	3390		31106	192000		25348.5	12000		25354.1	19400
		26008	6000		31298.5	3390		31107	206000		25348.8	12500		25354.4	20200
		26009	7710		31298.6	3400		31108	207000		25349.1	13000		25354.8	21100
		26010	9470		31298.7	3410		31109	193000		25349.5	13400		25355.1	21800
		26011	9490		31298.8	3420		31110	177000		25349.8	13800		25355.4	22300
		26012	7650		31298.9	3440		31111	173000		25350.1	14000		25355.7	22500
		26013	5870		31299	3450		31112	177000		25350.5	14000		25356.1	22300
		26014	5070		31299.1	3460		31113	182000		25350.8	13900		25356.4	21500
		26015	4800		31299.2	3470		31114	185000		25351.1	13700		25356.7	20300
		26016	4700		31299.3	3480		31115	183000		25351.5	13400		25357.1	19000
		26017	4720		31299.4	3500		31116	191000		25351.8	13300		25357.4	17800
		26018	4780		31299.5	3510		31117	201000		25352.1	13200		25357.7	16700
		26019	4840		31299.6	3520		31118	186000		25352.4	13200		25358.1	15900
		26020	4910		31299.7	3540		31119	174000		25352.8	13400		25358.4	15400
		26021	5350		31299.8	3550		31120	180000		25353.1	13600		25358.7	15200
		26022	6140		31299.9	3570		31121	183000		25353.4	13800		25359	15200
		26023	6210		31300	3580		31122	180000		25353.8	14000		25359.4	15100
		26024	5030		31300.1	3600		31123	173000		25354.1	14200		25359.7	14600
		26025	3590		31300.2	3610		31124	169000		25354.4	14400		25360	13700
		26026	2800		31300.3	3630		31125	166000		25354.8	14500		25360.4	12500
		26027	2510		31300.4	3650		31126	169000		25355.1	14500		25360.7	11500
		26028	2440		31300.5	3660		31127	176000		25355.4	14300		25361	12000
		26029	2500		31300.6	3680		31128	182000		25355.7	14200		25361.3	17200
		26030	2750		31300.7	3700		31129	186000		25356.1	13900		25361.7	31100
		26031	3270		31300.8	3720		31130	195000		25356.4	13700		25362	52700
		26032	4120		31300.9	3740		31131	193000		25356.7	13400		25362.3	71200
		26033	5260		31301	3760		31132	172000		25357.1	13200		25362.7	73100
		26034	6430		31301.1	3780		31133	159000		25357.4	13000		25363	57300
		26035	7230		31301.2	3810		31134	165000		25357.7	13000		25363.3	36500
		26036	7420		31301.3	3830		31135	187000		25358.1	12900		25363.7	22200
		26037	7110		31301.4	3860		31136	209000		25358.4	12700		25364	16000
		26038	6560		31301.5	3880		31137	210000		25358.7	12500		25364.3	14000
		26039	5920		31301.6	3910		31138	211000		25359	12200		25364.7	13300
		26040	5160		31301.7	3940		31139	214000		25359.4	12000		25365	12500
		26041	4230		31301.8	3970		31140	195000		25359.7	11900		25365.3	11700
		26042	3270		31301.9	4000		31141	204000		25360	12000		25365.6	10900
		26043	2550		31302	4030		31142	247000		25360.4	12400		25366	10200
		26044	2180		31302.1	4060		31143	242000		25360.7	13200		25366.3	9940
		26045	2090		31302.2	4100		31144	203000		25361	14300		25366.6	10000
		26046	2180		31302.3	4130		31145	187000		25361.3	15700		25367	10500
		26047	2420		31302.4	4170		31146	194000		25361.7	17300		25367.3	11300
		26048	2810		31302.5	4210		31147	196000		25362	18700		25367.6	12400
		26049	3310		31302.6	4250		31148	181000		25362.3	19800		25368	13700
		26050	3920		31302.7	4290		31149	168000		25362.7	20200		25368.3	15000
		26051	4650		31302.8	4330		31150	166000		25363	20000		25368.6	16300
		26052	5550		31302.9	4370		31151	165000		25363.3	19400		25368.9	17400
		26053	6520		31303	4410		31152	166000		25363.7	18600		25369.3	18400
		26054	7290		31303.1	4450		31153	181000		25364	17700		25369.6	19200
		26055	7580		31303.2	4500		31154	209000		25364.3	17100		25369.9	19600
		26056	7280		31303.3	4540		31155	224000		25364.7	16800		25370.3	19800
		26057	6640		31303.4	4590		31156	212000		25365	16700		25370.6	19300
		26058	6040		31303.5	4640		31157	188000		25365.3	16600		25370.9	18400
		26059	5680		31303.6	4680		31158	163000		25365.6	16400		25371.2	17100
		26060	5400		31303.7	4730		31159	151000		25366	16100		25371.6	15800
		26061	4960		31303.8	4780		31160	155000		25366.3	15600		25371.9	14700
		26062	4420		31303.9	4830		31161	159000		25366.6	15100		25372.2	13900
		26063	4010		31304	4880		31162	166000		25367	14500		25372.6	13100
		26064	3740		31304.1	4930		31163	181000		25367.3	13900		25372.9	12400
		26065	3530		31304.2	4980		31164	194000		25367.6	13300		25373.2	11400
		26066	3450		31304.3	5030		31165	202000		25368	12800		25373.6	10200
		26067	3550		31304.4	5090		31166	205000		25368.3	12400		25373.9	8930
		26068	3750		31304.5	5140		31167	197000		25368.6	11900		25374.2	7680
		26069	4000		31304.6	5190		31168	184000		25368.9	11500		25374.6	6570
		26070	4440		31304.7	5240		31169	182000		25369.3	11100		25374.9	5650
		26071	5160		31304.8	5300		31170	190000		25369.6	10700		25375.2	4990
		26072	5990		31304.9	5350		31171	182000		25369.9	10400		25375.5	4600
		26073	6830		31305	5410		31172	150000		25370.3	10200		25375.9	4420
		26074	7610		31305.1	5460		31173	132000		25370.6	10000		25376.2	4430
		26075	8210		31305.2	5510		31174	141000		25370.9	9920		25376.5	4600
		26076	8440		31305.3	5570		31175	169000		25371.2	9880		25376.9	4980
		26077	7940		31305.4	5620		31176	204000		25371.6	9890		25377.2	5590
		26078	6700		31305.5	5670		31177	228000		25371.9	9930		25377.5	6470
		26079	5390		31305.6	5730		31178	233000		25372.2	9980		25377.8	7650
		26080	4630		31305.7	5780		31179	224000		25372.6	10000		25378.2	9140
		26081	4520		31305.8	5830		31180	207000		25372.9	10100		25378.5	10900
		26082	4890		31305.9	5880		31181	183000		25373.2	10100		25378.8	12600
		26083	5510		31306	5930		31182	160000		25373.6	10100		25379.2	14200
		26084	6230		31306.1	5980		31183	149000		25373.9	10000		25379.5	15200
		26085	7030		31306.2	6030		31184	153000		25374.2	9980		25379.8	15600
		26086	7990		31306.3	6070		31185	166000		25374.6	9930		25380.2	15600
		26087	8960		31306.4	6120		31186	176000		25374.9	9900		25380.5	15200
		26088	9520		31306.5	6160		31187	182000		25375.2	9900		25380.8	14600
		26089	9390		31306.6	6210		31188	190000		25375.5	9940		25381.2	13900
		26090	8840		31306.7	6250		31189	202000		25375.9	10000		25381.5	13100
		26091	8140		31306.8	6280		31190	205000		25376.2	10200		25381.8	12400
		26092	7260		31306.9	6320		31191	195000		25376.5	10400		25382.1	11700
		26093	6210		31307	6350		31192	182000		25376.9	10700		25382.5	11000
		26094	5040		31307.1	6390		31193	177000		25377.2	11000		25382.8	10500
		26095	3950		31307.2	6410		31194	181000		25377.5	11300		25383.1	9990
		26096	3230		31307.3	6440		31195	185000		25377.8	11600		25383.5	9590
		26097	2990		31307.4	6460		31196	202000		25378.2	11900		25383.8	9290
		26098	3080		31307.5	6480		31197	208000		25378.5	12100		25384.1	9110
		26099	3480		31307.6	6490		31198	174000		25378.8	12300		25384.5	9060
		26100	4490		31307.7	6500		31199	166000		25379.2	12400		25384.8	9110
		26101	6590		31307.8	6510		31200	184000		25379.5	12400		25385.1	9230
		26102	10300		31307.9	6510		31201	181000		25379.8	12300		25385.4	9350
		26103	16000		31308	6510		31202	184000		25380.2	12100		25385.8	9470
		26104	23300		31308.1	6500		31203	201000		25380.5	12000		25386.1	9640
		26105	29700		31308.2	6490		31204	210000		25380.8	11800		25386.4	9920
		26106	31000		31308.3	6480		31205	203000		25381.2	11800		25386.8	10300
		26107	25300		31308.4	6460		31206	183000		25381.5	11800		25387.1	10700
		26108	16800		31308.5	6440		31207	159000		25381.8	11900		25387.4	11100
		26109	9940		31308.6	6420		31208	140000		25382.1	12100		25387.8	11200
		26110	5930		31308.7	6390		31209	132000		25382.5	12200		25388.1	11200
		26111	3850		31308.8	6360		31210	136000		25382.8	12200		25388.4	11200
		26112	3030		31308.9	6330		31211	151000		25383.1	12000		25388.7	11200
		26113	3090		31309	6290		31212	170000		25383.5	11400		25389.1	11100
		26114	3580		31309.1	6250		31213	193000		25383.8	10800		25389.4	10900
		26115	3870		31309.2	6210		31214	217000		25384.1	10300		25389.7	10700
		26116	4000		31309.3	6170		31215	223000		25384.5	10100		25390.1	10600
		26117	4690		31309.4	6120		31216	214000		25384.8	10200		25390.4	10500
		26118	6640		31309.5	6070		31217	209000		25385.1	10500		25390.7	10400
		26119	10300		31309.6	6030		31218	204000		25385.4	11000		25391.1	10500
		26120	15300		31309.7	5970		31219	190000		25385.8	11400		25391.4	10500
		26121	20100		31309.8	5920		31220	179000		25386.1	11800		25391.7	10500
		26122	22700		31309.9	5870		31221	173000		25386.4	12000		25392	10400
		26123	21700		31310	5810		31222	177000		25386.8	12000		25392.4	10500
		26124	17900		31310.1	5760		31223	191000		25387.1	12000		25392.7	11600
		26125	13600		31310.2	5700		31224	218000		25387.4	11800		25393	14900
		26126	9900		31310.3	5640		31225	225000		25387.8	11700		25393.4	19300
		26127	7150		31310.4	5580		31226	189000		25388.1	11700		25393.7	20600
		26128	5260		31310.5	5520		31227	163000		25388.4	11700		25394	17200
		26129	4190		31310.6	5470		31228	163000		25388.7	11800		25394.3	12200
		26130	3770		31310.7	5410		31229	172000		25389.1	12000		25394.7	9310
		26131	3810		31310.8	5350		31230	205000		25389.4	12300		25395	8490
		26132	4230		31310.9	5290		31231	260000		25389.7	12600		25395.3	8650
		26133	5040		31311	5230		31232	260000		25390.1	13000		25395.7	9190
		26134	6140		31311.1	5180		31233	195000		25390.4	13500		25396	9940
		26135	7640		31311.2	5120		31234	150000		25390.7	14000		25396.3	10900
		26136	10000		31311.3	5060		31235	143000		25391.1	14400		25396.7	11800
		26137	13500		31311.4	5010		31236	141000		25391.4	14800		25397	12600
		26138	17400		31311.5	4950		31237	145000		25391.7	15200		25397.3	12900
		26139	20300		31311.6	4900		31238	155000		25392	15400		25397.7	12500
		26140	21100		31311.7	4840		31239	169000		25392.4	15400		25398	11400
		26141	19500		31311.8	4790		31240	182000		25392.7	15100		25398.3	10200
		26142	16700		31311.9	4740		31241	189000		25393	14500		25398.6	9360
		26143	13800		31312	4690		31242	192000		25393.4	13600		25399	9130
		26144	11200		31312.1	4640		31243	197000		25393.7	12500		25399.3	9430
		26145	8880		31312.2	4590		31244	200000		25394	11500		25399.6	10100
		26146	6750		31312.3	4550		31245	197000		25394.3	10700		25400	11000
		26147	5370		31312.4	4500		31246	197000		25394.7	10200		25400.3	12000
		26148	5000		31312.5	4460		31247	199000		25395	9920		25400.6	13000
		26149	5420		31312.6	4420		31248	190000		25395.3	9870		25401	13800
		26150	6180		31312.7	4370		31249	174000		25395.7	9970		25401.3	14300
		26151	6860		31312.8	4330		31250	195000		25396	10100		25401.6	14400
		26152	7450		31312.9	4290		31251	231000		25396.3	10300		25401.9	14200
		26153	8310		31313	4260		31252	201000		25396.7	10500		25402.3	13900
		26154	9670		31313.1	4220		31253	159000		25397	10700		25402.6	13500
		26155	11300		31313.2	4180		31254	156000		25397.3	10800		25402.9	12900
		26156	12800		31313.3	4150		31255	167000		25397.7	10900		25403.3	12200
		26157	13300		31313.4	4120		31256	183000		25398	11000		25403.6	11500
		26158	12500		31313.5	4090		31257	203000		25398.3	11000		25403.9	11000
		26159	10600		31313.6	4050		31258	234000		25398.6	11000		25404.2	10700
		26160	8610		31313.7	4020		31259	270000		25399	11100		25404.6	10600
		26161	7000		31313.8	4000		31260	273000		25399.3	11100		25404.9	10700
		26162	6010		31313.9	3970		31261	235000		25399.6	11200		25405.2	10900
		26163	5630		31314	3940		31262	190000		25400	11300		25405.6	10900
		26164	5800		31314.1	3910		31263	158000		25400.3	11500		25405.9	10900
		26165	6350		31314.2	3890		31264	153000		25400.6	11800		25406.2	10900
		26166	7040		31314.3	3870		31265	164000		25401	12200		25406.6	10900
		26167	7720		31314.4	3840		31266	170000		25401.3	12800		25406.9	11200
		26168	8440		31314.5	3820		31267	185000		25401.6	13600		25407.2	11500
		26169	9200		31314.6	3800		31268	205000		25401.9	14500		25407.6	11900
		26170	9650		31314.7	3780		31269	203000		25402.3	15500		25407.9	12300
		26171	9530		31314.8	3760		31270	187000		25402.6	16500		25408.2	12600
		26172	8950		31314.9	3740		31271	174000		25402.9	17100		25408.5	12900
		26173	8130		31315	3720		31272	173000		25403.3	17300		25408.9	13200
		26174	7220		31315.1	3700		31273	188000		25403.6	16900		25409.2	13700
		26175	6400		31315.2	3690		31274	216000		25403.9	16300		25409.5	14300
		26176	5810		31315.3	3670		31275	231000		25404.2	15700		25409.9	15000
		26177	5470		31315.4	3650		31276	233000		25404.6	15100		25410.2	15700
		26178	5350		31315.5	3640		31277	222000		25404.9	14700		25410.5	16300
		26179	5310		31315.6	3620		31278	196000		25405.2	14400		25410.8	16800
		26180	5250		31315.7	3610		31279	179000		25405.6	14200		25411.2	17200
		26181	5200		31315.8	3600		31280	165000		25405.9	14000		25411.5	17500
		26182	5370		31315.9	3580		31281	161000		25406.2	13900		25411.8	17900
		26183	5920		31316	3570		31282	172000		25406.6	13800		25412.2	18400
		26184	6860		31316.1	3560		31283	189000		25406.9	13800		25412.5	18900
		26185	7930		31316.2	3550		31284	209000		25407.2	13800		25412.8	19400
		26186	8640		31316.3	3540		31285	221000		25407.6	13800		25413.2	19800
		26187	8690		31316.4	3530		31286	216000		25407.9	13900		25413.5	19800
		26188	8220		31316.5	3520		31287	201000		25408.2	13900		25413.8	19300
		26189	7480		31316.6	3510		31288	193000		25408.5	13900		25414.2	18200
		26190	6620		31316.7	3500		31289	194000		25408.9	13700		25414.5	16700
		26191	5850		31316.8	3500		31290	192000		25409.2	13500		25414.8	15000
		26192	5320		31316.9	3490		31291	190000		25409.5	13200		25415.1	13400
		26193	5020		31317	3480		31292	197000		25409.9	12800		25415.5	12000
		26194	4910		31317.1	3470		31293	206000		25410.2	12200		25415.8	10800
		26195	5000		31317.2	3470		31294	199000		25410.5	11600		25416.1	9790
		26196	5390		31317.3	3460		31295	184000		25410.8	11000		25416.5	9070
		26197	6190		31317.4	3460		31296	173000		25411.2	10500		25416.8	8570
		26198	7400		31317.5	3450		31297	167000		25411.5	10100		25417.1	8290
		26199	8630		31317.6	3450		31298	169000		25411.8	9800		25417.5	8280
		26200	9340		31317.7	3450		31299	172000		25412.2	9510		25417.8	8790
		26201	9450		31317.8	3440		31300	171000		25412.5	9250		25418.1	10600
		26202	9250		31317.9	3440		31301	172000		25412.8	9030		25418.4	14900
		26203	8800		31318	3440		31302	182000		25413.2	8870		25418.8	21900
		26204	8010		31318.1	3430		31303	206000		25413.5	8770		25419.1	28800
		26205	6970		31318.2	3430		31304	241000		25413.8	8780		25419.4	30900
		26206	5890		31318.3	3430		31305	258000		25414.2	8930		25419.8	26700
		26207	4920		31318.4	3430		31306	243000		25414.5	9230		25420.1	19800
		26208	4150		31318.5	3420		31307	223000		25414.8	9680		25420.4	14300
		26209	3680		31318.6	3420		31308	205000		25415.1	10200		25420.8	11700
		26210	3550		31318.7	3420		31309	182000		25415.5	10800		25421.1	11100
		26211	3680		31318.8	3420		31310	156000		25415.8	11400		25421.4	11300
		26212	3960		31318.9	3420		31311	138000		25416.1	11700		25421.7	11800
		26213	4280		31319	3420		31312	140000		25416.5	11900		25422.1	12300
		26214	4500		31319.1	3420		31313	159000		25416.8	12000		25422.4	12900
		26215	4550		31319.2	3410		31314	183000		25417.1	11900		25422.7	13600
		26216	4500		31319.3	3410		31315	211000		25417.5	11800		25423.1	14400
		26217	4640		31319.4	3410		31316	235000		25417.8	11800		25423.4	15500
		26218	5160		31319.5	3410		31317	239000		25418.1	11900		25423.7	16900
		26219	5950		31319.6	3410		31318	225000		25418.4	12000		25424.1	18700
		26220	6660		31319.7	3410		31319	212000		25418.8	12200		25424.4	20700
		26221	7070		31319.8	3410		31320	204000		25419.1	12400		25424.7	22900
		26222	7170		31319.9	3420		31321	203000		25419.4	12400		25425	25000
		26223	6940		31320	3420		31322	211000		25419.8	12400		25425.4	26500
		26224	6370		31320.1	3420		31323	214000		25420.1	12300		25425.7	27500
		26225	5690		31320.2	3420		31324	201000		25420.4	12200		25426	29000
		26226	5200		31320.3	3420		31325	179000		25420.8	12200		25426.4	31700
		26227	4870		31320.4	3420		31326	166000		25421.1	12400		25426.7	32800
		26228	4530		31320.5	3430		31327	169000		25421.4	12900		25427	28600
		26229	4200		31320.6	3430		31328	178000		25421.7	13600		25427.3	21400
		26230	3990		31320.7	3430		31329	192000		25422.1	14500		25427.7	16200
		26231	3970		31320.8	3430		31330	208000		25422.4	15200		25428	14000
		26232	4110		31320.9	3440		31331	221000		25422.7	15800		25428.3	13200
		26233	4260		31321	3440		31332	250000		25423.1	16100		25428.7	12900
		26234	4360		31321.1	3440		31333	275000		25423.4	16300		25429	12900
		26235	4420		31321.2	3450		31334	242000		25423.7	16400		25429.3	12900
		26236	4360		31321.3	3450		31335	194000		25424.1	16500		25429.7	13100
		26237	4230		31321.4	3460		31336	198000		25424.4	16800		25430	13300
		26238	4160		31321.5	3460		31337	225000		25424.7	17500		25430.3	13400
		26239	4200		31321.6	3470		31338	246000		25425	18600		25430.7	13400
		26240	4330		31321.7	3480		31339	251000		25425.4	19900		25431	13300
		26241	4550		31321.8	3480		31340	240000		25425.7	20800		25431.3	12900
		26242	4940		31321.9	3490		31341	234000		25426	20800		25431.6	12400
		26243	5710		31322	3500		31342	227000		25426.4	19700		25432	11800
		26244	6770		31322.1	3510		31343	205000		25426.7	18000		25432.3	11200
		26245	7490		31322.2	3510		31344	184000		25427	16300		25432.6	10700
		26246	7300		31322.3	3520		31345	171000		25427.3	14900		25433	10300
		26247	6420		31322.4	3530		31346	168000		25427.7	14100		25433.3	9950
		26248	5470		31322.5	3540		31347	170000		25428	13500		25433.6	9570
		26249	4760		31322.6	3550		31348	168000		25428.3	13200		25434	9210
		26250	4360		31322.7	3560		31349	166000		25428.7	12900		25434.3	8940
		26251	4220		31322.8	3580		31350	170000		25429	12700		25434.6	8820
		26252	4310		31322.9	3590		31351	184000		25429.3	12600		25434.9	8870
		26253	4650		31323	3600		31352	202000		25429.7	12500		25435.3	9040
		26254	5270		31323.1	3610		31353	218000		25430	12400		25435.6	9290
		26255	6060		31323.2	3630		31354	231000		25430.3	12200		25435.9	9550
		26256	6690		31323.3	3640		31355	231000		25430.7	12100		25436.3	9760
		26257	6820		31323.4	3660		31356	216000		25431	11900		25436.6	9940
		26258	6450		31323.5	3670		31357	192000		25431.3	11600		25436.9	10100
		26259	5940		31323.6	3690		31358	183000		25431.6	11400		25437.2	10300
		26260	5930		31323.7	3700		31359	190000		25432	11200		25437.6	10600
		26261	6760		31323.8	3720		31360	193000		25432.3	11100		25437.9	11000
		26262	8260		31323.9	3730		31361	199000		25432.6	10900		25438.2	11500
		26263	9780		31324	3750		31362	243000		25433	10700		25438.6	12100
		26264	10500		31324.1	3760		31363	283000		25433.3	10600		25438.9	12900
		26265	10100		31324.2	3780		31364	263000		25433.6	10500		25439.2	13800
		26266	9030		31324.3	3800		31365	225000		25434	10300		25439.6	14900
		26267	7850		31324.4	3810		31366	209000		25434.3	10000		25439.9	16100
		26268	6740		31324.5	3830		31367	197000		25434.6	9730		25440.2	17300
		26269	5650		31324.6	3850		31368	175000		25434.9	9480		25440.6	18400
		26270	4650		31324.7	3870		31369	166000		25435.3	9280		25440.9	19100
		26271	3910		31324.8	3890		31370	174000		25435.6	9170		25441.2	19300
		26272	3450		31324.9	3900		31371	184000		25435.9	9160		25441.5	19100
		26273	3150		31325	3920		31372	199000		25436.3	9270		25441.9	18500
		26274	2980		31325.1	3950		31373	222000		25436.6	9490		25442.2	18200
		26275	2960		31325.2	3970		31374	251000		25436.9	9840		25442.5	18800
		26276	3130		31325.3	3990		31375	271000		25437.2	10300		25442.9	20000
		26277	3600		31325.4	4010		31376	268000		25437.6	10900		25443.2	20000
		26278	4390		31325.5	4040		31377	241000		25437.9	11500		25443.5	17500
		26279	5400		31325.6	4060		31378	209000		25438.2	12200		25443.8	14100
		26280	6560		31325.7	4090		31379	185000		25438.6	12900		25444.2	12600
		26281	7840		31325.8	4120		31380	172000		25438.9	13600		25444.5	14900
		26282	9060		31325.9	4150		31381	169000		25439.2	14200		25444.8	21600
		26283	10100		31326	4180		31382	171000		25439.6	14700		25445.2	31800
		26284	11000		31326.1	4210		31383	175000		25439.9	15000		25445.5	41700
		26285	11800		31326.2	4240		31384	181000		25440.2	15200		25445.8	46400
		26286	11700		31326.3	4270		31385	191000		25440.6	15100		25446.2	42900
		26287	10200		31326.4	4310		31386	209000		25440.9	15100		25446.5	33200
		26288	7950		31326.5	4340		31387	246000		25441.2	15000		25446.8	22500
		26289	6230		31326.6	4380		31388	278000		25441.5	15200		25447.2	14500
		26290	5380		31326.7	4420		31389	264000		25441.9	15500		25447.5	10300
		26291	5120		31326.8	4460		31390	232000		25442.2	16000		25447.8	8900
		26292	5020		31326.9	4500		31391	206000		25442.5	16500		25448.1	9010
		26293	4810		31327	4540		31392	181000		25442.9	16900		25448.5	9690
		26294	4420		31327.1	4580		31393	167000		25443.2	17000		25448.8	10500
		26295	3990		31327.2	4630		31394	171000		25443.5	16900		25449.1	11100
		26296	3860		31327.3	4670		31395	186000		25443.8	16700		25449.5	11600
		26297	4360		31327.4	4720		31396	209000		25444.2	16300		25449.8	12200
		26298	5550		31327.5	4760		31397	229000		25444.5	15900		25450.1	13000
		26299	7150		31327.6	4810		31398	243000		25444.8	15500		25450.5	13900
		26300	8890		31327.7	4860		31399	255000		25445.2	15100		25450.8	14900
		26301	10700		31327.8	4910		31400	253000		25445.5	14600		25451.1	15600
		26302	12400		31327.9	4960		31401	229000		25445.8	14000		25451.4	16000
		26303	13400		31328	5010		31402	207000		25446.2	13300		25451.8	15800
		26304	12700		31328.1	5060		31403	200000		25446.5	12600		25452.1	15100
		26305	10500		31328.2	5110		31404	197000		25446.8	11800		25452.4	14000
		26306	8190		31328.3	5160		31405	189000		25447.2	11300		25452.8	12600
		26307	6890		31328.4	5210		31406	186000		25447.5	10800		25453.1	11200
		26308	6520		31328.5	5260		31407	194000		25447.8	10600		25453.4	10100
		26309	6460		31328.6	5320		31408	210000		25448.1	10500		25453.8	9210
		26310	6240		31328.7	5370		31409	226000		25448.5	10600		25454.1	8730
		26311	5870		31328.8	5420		31410	231000		25448.8	10800		25454.4	8530
		26312	5700		31328.9	5470		31411	226000		25449.1	11100		25454.7	8440
		26313	5980		31329	5530		31412	217000		25449.5	11400		25455.1	8300
		26314	6660		31329.1	5580		31413	207000		25449.8	11900		25455.4	8060
		26315	7480		31329.2	5630		31414	194000		25450.1	12500		25455.7	7790
		26316	8160		31329.3	5690		31415	176000		25450.5	13100		25456.1	7620
		26317	8830		31329.4	5740		31416	161000		25450.8	13800		25456.4	7700
		26318	9910		31329.5	5790		31417	160000		25451.1	14500		25456.7	8140
		26319	11200		31329.6	5840		31418	180000		25451.4	15100		25457.1	9010
		26320	11800		31329.7	5900		31419	218000		25451.8	15600		25457.4	10400
		26321	11000		31329.8	5950		31420	259000		25452.1	15900		25457.7	12300
		26322	9400		31329.9	6000		31421	279000		25452.4	16200		25458	14600
		26323	7560		31330	6050		31422	269000		25452.8	16300		25458.4	17300
		26324	5950		31330.1	6100		31423	246000		25453.1	16400		25458.7	20100
		26325	4840		31330.2	6150		31424	227000		25453.4	16300		25459	22800
		26326	4300		31330.3	6190		31425	218000		25453.8	16100		25459.4	25000
		26327	4190		31330.4	6240		31426	224000		25454.1	15900		25459.7	26600
		26328	4360		31330.5	6290		31427	237000		25454.4	15500		25460	27200
		26329	4890		31330.6	6330		31428	249000		25454.7	15200		25460.3	26700
		26330	5930		31330.7	6370		31429	244000		25455.1	14900		25460.7	25100
		26331	7320		31330.8	6410		31430	223000		25455.4	14600		25461	22500
		26332	8420		31330.9	6450		31431	232000		25455.7	14400		25461.3	19400
		26333	8730		31331	6490		31432	261000		25456.1	14300		25461.7	16300
		26334	8590		31331.1	6520		31433	279000		25456.4	14300		25462	13500
		26335	8590		31331.2	6560		31434	274000		25456.7	14300		25462.3	11200
		26336	8820		31331.3	6590		31435	229000		25457.1	14300		25462.7	9470
		26337	8870		31331.4	6620		31436	190000		25457.4	14300		25463	8190
		26338	8400		31331.5	6640		31437	177000		25457.7	14400		25463.3	7290
		26339	7500		31331.6	6660		31438	173000		25458	14500		25463.7	6650
		26340	6570		31331.7	6680		31439	187000		25458.4	14600		25464	6180
		26341	5940		31331.8	6700		31440	202000		25458.7	14700		25464.3	5800
		26342	5790		31331.9	6720		31441	191000		25459	14800		25464.6	5510
		26343	6210		31332	6730		31442	179000		25459.4	14800		25465	5340
		26344	7330		31332.1	6740		31443	187000		25459.7	14700		25465.3	5360
		26345	9150		31332.2	6740		31444	201000		25460	14400		25465.6	5630
		26346	11100		31332.3	6750		31445	217000		25460.3	14100		25466	6150
		26347	12400		31332.4	6750		31446	233000		25460.7	13700		25466.3	6880
		26348	12400		31332.5	6740		31447	252000		25461	13200		25466.6	7780
		26349	11700		31332.6	6740		31448	268000		25461.3	12800		25467	8800
		26350	10600		31332.7	6730		31449	270000		25461.7	12500		25467.3	9850
		26351	9360		31332.8	6720		31450	253000		25462	12100		25467.6	10800
		26352	8240		31332.9	6710		31451	226000		25462.3	11900		25467.9	11600
		26353	7380		31333	6690		31452	219000		25462.7	11700		25468.3	13400
		26354	6900		31333.1	6670		31453	228000		25463	11600		25468.6	20900
		26355	6840		31333.2	6650		31454	220000		25463.3	11500		25468.9	37900
		26356	7170		31333.3	6620		31455	214000		25463.7	11500		25469.3	53300
		26357	7840		31333.4	6600		31456	223000		25464	11500		25469.6	50600
		26358	8730		31333.5	6570		31457	228000		25464.3	11600		25469.9	35800
		26359	9520		31333.6	6540		31458	220000		25464.6	11600		25470.2	26000
		26360	9890		31333.7	6500		31459	206000		25465	11600		25470.6	23700
		26361	9950		31333.8	6470		31460	194000		25465.3	11500		25470.9	23400
		26362	9840		31333.9	6430		31461	189000		25465.6	11500		25471.2	22700
		26363	9370		31334	6390		31462	192000		25466	11400		25471.6	21500
		26364	8630		31334.1	6350		31463	201000		25466.3	11400		25471.9	20200
		26365	8010		31334.2	6310		31464	212000		25466.6	11500		25472.2	19100
		26366	7670		31334.3	6270		31465	226000		25467	12100		25472.6	18300
		26367	7510		31334.4	6220		31466	247000		25467.3	13400		25472.9	17800
		26368	7440		31334.5	6180		31467	266000		25467.6	16100		25473.2	17400
		26369	7420		31334.6	6130		31468	270000		25467.9	20300		25473.6	16800
		26370	7450		31334.7	6080		31469	268000		25468.3	25400		25473.9	16000
		26371	7560		31334.8	6030		31470	261000		25468.6	29600		25474.2	15000
		26372	7730		31334.9	5990		31471	245000		25468.9	31000		25474.5	13900
		26373	7830		31335	5940		31472	225000		25469.3	28800		25474.9	12900
		26374	7720		31335.1	5890		31473	215000		25469.6	24500		25475.2	11900
		26375	7370		31335.2	5840		31474	221000		25469.9	20000		25475.5	11000
		26376	7000		31335.3	5780		31475	226000		25470.2	17000		25475.9	10100
		26377	6900		31335.4	5730		31476	227000		25470.6	15700		25476.2	9290
		26378	7080		31335.5	5680		31477	230000		25470.9	15500		25476.5	8640
		26379	7310		31335.6	5630		31478	220000		25471.2	15800		25476.8	8290
		26380	7400		31335.7	5580		31479	207000		25471.6	16200		25477.2	8290
		26381	7330		31335.8	5530		31480	213000		25471.9	16400		25477.5	8660
		26382	7200		31335.9	5480		31481	223000		25472.2	16400		25477.8	9410
		26383	7090		31336	5430		31482	219000		25472.6	16300		25478.2	10500
		26384	7020		31336.1	5380		31483	205000		25472.9	16000		25478.5	11900
		26385	6980		31336.2	5340		31484	184000		25473.2	15600		25478.8	13400
		26386	7030		31336.3	5290		31485	163000		25473.6	15200		25479.2	14700
		26387	7250		31336.4	5240		31486	152000		25473.9	14700		25479.5	15400
		26388	7620		31336.5	5190		31487	159000		25474.2	14400		25479.8	15500
		26389	7940		31336.6	5140		31488	184000		25474.5	14000		25480.2	15100
		26390	7990		31336.7	5100		31489	229000		25474.9	13700		25480.5	14500
		26391	7800		31336.8	5050		31490	277000		25475.2	13400		25480.8	13900
		26392	7380		31336.9	5000		31491	310000		25475.5	13100		25481.1	13300
		26393	6780		31337	4960		31492	320000		25475.9	12800		25481.5	12800
		26394	6170		31337.1	4910		31493	309000		25476.2	12700		25481.8	12200
		26395	5700		31337.2	4870		31494	337000		25476.5	12700		25482.1	11700
		26396	5400		31337.3	4820		31495	364000		25476.8	12900		25482.5	11200
		26397	5330		31337.4	4780		31496	288000		25477.2	13300		25482.8	10700
		26398	5500		31337.5	4730		31497	218000		25477.5	13800		25483.1	10200
		26399	5880		31337.6	4690		31498	199000		25477.8	14400		25483.5	9830
		26400	6260		31337.7	4640		31499	163000		25478.2	14900		25483.8	9780
		26401	6340		31337.8	4600		31500	146000		25478.5	15200		25484.1	10100
		26402	6170		31337.9	4550		31501	156000		25478.8	15300		25484.4	11000
		26403	6060		31338	4510		31502	158000		25479.2	15300		25484.8	12200
		26404	6150		31338.1	4460		31503	172000		25479.5	15200		25485.1	13600
		26405	6440		31338.2	4420		31504	209000		25479.8	15000		25485.4	15000
		26406	6940		31338.3	4380		31505	248000		25480.2	14800		25485.8	16200
		26407	7730		31338.4	4330		31506	270000		25480.5	14700		25486.1	17100
		26408	8810		31338.5	4290		31507	270000		25480.8	14600		25486.4	17600
		26409	9910		31338.6	4250		31508	265000		25481.1	14400		25486.8	17800
		26410	10400		31338.7	4210		31509	263000		25481.5	14300		25487.1	17600
		26411	10100		31338.8	4160		31510	265000		25481.8	14100		25487.4	17200
		26412	9150		31338.9	4120		31511	270000		25482.1	13800		25487.7	16700
		26413	8400		31339	4080		31512	280000		25482.5	13400		25488.1	16100
		26414	8060		31339.1	4050		31513	287000		25482.8	13000		25488.4	15500
		26415	7930		31339.2	4010		31514	294000		25483.1	12600		25488.7	14900
		26416	7750		31339.3	3970		31515	302000		25483.5	12300		25489.1	14400
		26417	7560		31339.4	3930		31516	271000		25483.8	12100		25489.4	14100
		26418	7690		31339.5	3900		31517	223000		25484.1	11900		25489.7	13900
		26419	8510		31339.6	3860		31518	207000		25484.4	11900		25490.1	13800
		26420	9440		31339.7	3830		31519	212000		25484.8	12000		25490.4	14000
		26421	9220		31339.8	3800		31520	219000		25485.1	12200		25490.7	14200
		26422	7940		31339.9	3770		31521	206000		25485.4	12400		25491	14400
		26423	6850		31340	3740		31522	181000		25485.8	12600		25491.4	14500
		26424	6410		31340.1	3710		31523	170000		25486.1	12800		25491.7	14200
		26425	6300		31340.2	3680		31524	178000		25486.4	12900		25492	13800
		26426	6390		31340.3	3660		31525	190000		25486.8	13000		25492.4	13300
		26427	6790		31340.4	3630		31526	205000		25487.1	13100		25492.7	12700
		26428	7540		31340.5	3610		31527	229000		25487.4	13200		25493	12100
		26429	8310		31340.6	3590		31528	263000		25487.7	13200		25493.3	11500
		26430	8790		31340.7	3570		31529	309000		25488.1	13200		25493.7	10600
		26431	8840		31340.8	3550		31530	350000		25488.4	13100		25494	9470
		26432	8330		31340.9	3530		31531	348000		25488.7	13200		25494.3	8590
		26433	7370		31341	3510		31532	293000		25489.1	13200		25494.7	8140
		26434	6340		31341.1	3490		31533	224000		25489.4	13200		25495	8110
		26435	5570		31341.2	3480		31534	181000		25489.7	13100		25495.3	8450
		26436	5280		31341.3	3460		31535	168000		25490.1	12800		25495.7	9130
		26437	5690		31341.4	3450		31536	167000		25490.4	12500		25496	10100
		26438	6850		31341.5	3440		31537	163000		25490.7	12300		25496.3	11200
		26439	8170		31341.6	3430		31538	171000		25491	12200		25496.7	12500
		26440	8660		31341.7	3420		31539	191000		25491.4	12300		25497	13700
		26441	8090		31341.8	3410		31540	205000		25491.7	12800		25497.3	14900
		26442	7270		31341.9	3400		31541	207000		25492	13500		25497.6	15900
		26443	6990		31342	3400		31542	205000		25492.4	14600		25498	16800
		26444	7310		31342.1	3390		31543	210000		25492.7	15600		25498.3	17600
		26445	7840		31342.2	3390		31544	224000		25493	16500		25498.6	18000
		26446	8290		31342.3	3380		31545	248000		25493.3	17000		25499	18100
		26447	8450		31342.4	3380		31546	290000		25493.7	17000		25499.3	17900
		26448	8330		31342.5	3380		31547	322000		25494	16600		25499.6	17400
		26449	8080		31342.6	3380		31548	294000		25494.3	16000		25500	16800
		26450	7670		31342.7	3380		31549	243000		25494.7	15300		25500.3	16200
		26451	6910		31342.8	3380		31550	223000		25495	14800		25500.6	15600
		26452	5880		31342.9	3390		31551	222000		25495.3	14500		25500.9	15100
		26453	4920		31343	3390		31552	220000		25495.7	14400		25501.3	14600
		26454	4430		31343.1	3400		31553	217000		25496	14400		25501.6	14100
		26455	4890		31343.2	3400		31554	221000		25496.3	14500		25501.9	13500
		26456	6930		31343.3	3410		31555	230000		25496.7	14700		25502.3	12900
		26457	10400		31343.4	3420		31556	235000		25497	15000		25502.6	12500
		26458	13200		31343.5	3430		31557	229000		25497.3	15100		25502.9	12200
		26459	13100		31343.6	3430		31558	209000		25497.6	15200		25503.2	12100
		26460	10500		31343.7	3450		31559	181000		25498	15200		25503.6	12100
		26461	7920		31343.8	3460		31560	162000		25498.3	15100		25503.9	12000
		26462	6320		31343.9	3470		31561	162000		25498.6	15000		25504.2	11700
		26463	5570		31344	3480		31562	190000		25499	14800		25504.6	11200
		26464	5420		31344.1	3490		31563	237000		25499.3	14500		25504.9	10700
		26465	5700		31344.2	3510		31564	264000		25499.6	14200		25505.2	10100
		26466	6240		31344.3	3520		31565	260000		25500	13900		25505.6	9690
		26467	6650		31344.4	3540		31566	245000		25500.3	13400		25505.9	9410
		26468	6530		31344.5	3550		31567	238000		25500.6	12900		25506.2	9310
		26469	5960		31344.6	3570		31568	241000		25500.9	12300		25506.6	9350
		26470	5480		31344.7	3580		31569	255000		25501.3	11700		25506.9	9470
		26471	5770		31344.8	3600		31570	268000		25501.6	11000		25507.2	9610
		26472	7100		31344.9	3610		31571	259000		25501.9	10500		25507.5	9790
		26473	9080		31345	3630		31572	248000		25502.3	9900		25507.9	10100
		26474	11000		31345.1	3650		31573	242000		25502.6	9400		25508.2	10700
		26475	12000		31345.2	3660		31574	214000		25502.9	8980		25508.5	11500
		26476	11300		31345.3	3680		31575	188000		25503.2	8640		25508.9	12700
		26477	9110		31345.4	3700		31576	180000		25503.6	8400		25509.2	13900
		26478	6770		31345.5	3710		31577	178000		25503.9	8280		25509.5	14700
		26479	5360		31345.6	3730		31578	184000		25504.2	8280		25509.8	15000
		26480	4940		31345.7	3750		31579	194000		25504.6	8410		25510.2	14400
		26481	4990		31345.8	3770		31580	201000		25504.9	8660		25510.5	13200
		26482	5100		31345.9	3780		31581	202000		25505.2	9040		25510.8	11700
		26483	5040		31346	3800		31582	209000		25505.6	9510		25511.2	10600
		26484	4800		31346.1	3820		31583	229000		25505.9	10000		25511.5	11700
		26485	4580		31346.2	3830		31584	262000		25506.2	10500		25511.8	21200
		26486	4590		31346.3	3850		31585	282000		25506.6	10900		25512.2	43100
		26487	4970		31346.4	3860		31586	264000		25506.9	11100		25512.5	62700
		26488	5670		31346.5	3880		31587	235000		25507.2	11100		25512.8	57800
		26489	6620		31346.6	3900		31588	215000		25507.5	10900		25513.2	34300
		26490	8100		31346.7	3910		31589	197000		25507.9	10700		25513.5	16000
		26491	10400		31346.8	3930		31590	182000		25508.2	10500		25513.8	9870
		26492	13000		31346.9	3940		31591	173000		25508.5	10400		25514.1	9350
		26493	14400		31347	3960		31592	170000		25508.9	10400		25514.5	10100
		26494	13500		31347.1	3970		31593	178000		25509.2	10500		25514.8	11200
		26495	11300		31347.2	3980		31594	198000		25509.5	10700		25515.1	12600
		26496	9450		31347.3	4000		31595	239000		25509.8	11000		25515.5	14100
		26497	8080		31347.4	4010		31596	277000		25510.2	11600		25515.8	15500
		26498	6690		31347.5	4030		31597	282000		25510.5	12700		25516.1	16600
		26499	5270		31347.6	4040		31598	273000		25510.8	14600		25516.5	17300
		26500	4210		31347.7	4050		31599	280000		25511.2	17400		25516.8	17300
		26501	3700		31347.8	4070		31600	274000		25511.5	20600		25517.1	16800
		26502	3780		31347.9	4080		31601	258000		25511.8	23000		25517.4	16000
		26503	4550		31348	4100		31602	268000		25512.2	23700		25517.8	14900
		26504	6070		31348.1	4110		31603	246000		25512.5	22700		25518.1	13700
		26505	7920		31348.2	4130		31604	212000		25512.8	20600		25518.4	12600
		26506	9090		31348.3	4140		31605	199000		25513.2	18500		25518.8	11600
		26507	9060		31348.4	4160		31606	187000		25513.5	17000		25519.1	10800
		26508	8650		31348.5	4180		31607	182000		25513.8	16000		25519.4	10000
		26509	8840		31348.6	4190		31608	189000		25514.1	15200		25519.8	9520
		26510	9920		31348.7	4210		31609	207000		25514.5	14400		25520.1	9240
		26511	11700		31348.8	4230		31610	238000		25514.8	13700		25520.4	9200
		26512	13200		31348.9	4250		31611	273000		25515.1	13100		25520.7	9430
		26513	13100		31349	4270		31612	285000		25515.5	12700		25521.1	9980
		26514	10900		31349.1	4300		31613	257000		25515.8	12500		25521.4	11000
		26515	8120		31349.2	4320		31614	209000		25516.1	12400		25521.7	12400
		26516	6210		31349.3	4340		31615	170000		25516.5	12600		25522.1	14200
		26517	5250		31349.4	4370		31616	148000		25516.8	12800		25522.4	16100
		26518	4710		31349.5	4400		31617	141000		25517.1	13100		25522.7	17400
		26519	4320		31349.6	4430		31618	149000		25517.4	13500		25523.1	17600
		26520	4070		31349.7	4460		31619	170000		25517.8	13800		25523.4	16700
		26521	4040		31349.8	4490		31620	202000		25518.1	14100		25523.7	15200
		26522	4170		31349.9	4520		31621	234000		25518.4	14400		25524	13500
		26523	4280		31350	4560		31622	242000		25518.8	14700		25524.4	12000
		26524	4290		31350.1	4590		31623	236000		25519.1	14900		25524.7	10800
		26525	4310		31350.2	4630		31624	236000		25519.4	14900		25525	9930
		26526	4660		31350.3	4670		31625	236000		25519.8	14800		25525.4	9400
		26527	5760		31350.4	4720		31626	223000		25520.1	14500		25525.7	9150
		26528	7840		31350.5	4760		31627	201000		25520.4	14000		25526	9170
		26529	10500		31350.6	4810		31628	186000		25520.7	13500		25526.3	9460
		26530	12400		31350.7	4850		31629	189000		25521.1	12900		25526.7	10000
		26531	12600		31350.8	4900		31630	207000		25521.4	12300		25527	10900
		26532	11700		31350.9	4950		31631	226000		25521.7	11700		25527.3	12000
		26533	10400		31351	5010		31632	226000		25522.1	11300		25527.7	13400
		26534	9260		31351.1	5060		31633	200000		25522.4	10900		25528	15000
		26535	8190		31351.2	5120		31634	177000		25522.7	10700		25528.3	16700
		26536	7220		31351.3	5180		31635	173000		25523.1	10600		25528.7	18300
		26537	6370		31351.4	5240		31636	176000		25523.4	10600		25529	19500
		26538	5790		31351.5	5300		31637	185000		25523.7	10700		25529.3	20000
		26539	5620		31351.6	5360		31638	199000		25524	10900		25529.7	19700
		26540	5780		31351.7	5430		31639	213000		25524.4	11100		25530	18500
		26541	5830		31351.8	5500		31640	223000		25524.7	11300		25530.3	16800
		26542	5410		31351.9	5570		31641	224000		25525	11500		25530.6	14900
		26543	4870		31352	5640		31642	217000		25525.4	11600		25531	13300
		26544	4860		31352.1	5710		31643	203000		25525.7	11600		25531.3	12000
		26545	5730		31352.2	5780		31644	188000		25526	11400		25531.6	10900
		26546	7240		31352.3	5860		31645	174000		25526.3	11100		25532	10100
		26547	8710		31352.4	5930		31646	167000		25526.7	10700		25532.3	10400
		26548	9400		31352.5	6010		31647	168000		25527	10300		25532.6	17900
		26549	9100		31352.6	6090		31648	176000		25527.3	9790		25533	45100
		26550	8190		31352.7	6160		31649	184000		25527.7	9380		25533.3	83700
		26551	7340		31352.8	6240		31650	191000		25528	9020		25533.6	91400
		26552	7010		31352.9	6320		31651	207000		25528.3	8760		25533.9	57900
		26553	7150		31353	6400		31652	222000		25528.7	8600		25534.3	24100
		26554	7270		31353.1	6480		31653	209000		25529	8550		25534.6	12000
		26555	7050		31353.2	6560		31654	188000		25529.3	8600		25534.9	11000
		26556	6680		31353.3	6640		31655	194000		25529.7	8740		25535.3	11900
		26557	6560		31353.4	6720		31656	218000		25530	8910		25535.6	12800
		26558	6790		31353.5	6790		31657	241000		25530.3	9110		25535.9	13600
		26559	7180		31353.6	6870		31658	247000		25530.6	9340		25536.2	14400
		26560	7570		31353.7	6940		31659	236000		25531	9670		25536.6	15600
		26561	7920		31353.8	7020		31660	223000		25531.3	10300		25536.9	17000
		26562	8350		31353.9	7090		31661	211000		25531.6	11500		25537.2	18000
		26563	8890		31354	7160		31662	197000		25532	14000		25537.6	18500
		26564	9310		31354.1	7230		31663	182000		25532.3	18100		25537.9	18500
		26565	9070		31354.2	7300		31664	166000		25532.6	23700		25538.2	18400
		26566	8060		31354.3	7360		31665	162000		25533	29100		25538.6	18500
		26567	6760		31354.4	7420		31666	192000		25533.3	32400		25538.9	18900
		26568	5790		31354.5	7480		31667	226000		25533.6	32200		25539.2	19500
		26569	5440		31354.6	7540		31668	224000		25533.9	29300		25539.6	20100
		26570	5630		31354.7	7590		31669	215000		25534.3	25400		25539.9	20400
		26571	6050		31354.8	7640		31670	204000		25534.6	22000		25540.2	20300
		26572	6600		31354.9	7690		31671	178000		25534.9	19700		25540.5	19900
		26573	7430		31355	7730		31672	154000		25535.3	18200		25540.9	19500
		26574	8390		31355.1	7770		31673	143000		25535.6	17200		25541.2	19000
		26575	8930		31355.2	7800		31674	147000		25535.9	16600		25541.5	18300
		26576	8680		31355.3	7840		31675	166000		25536.2	16100		25541.9	17300
		26577	7870		31355.4	7860		31676	191000		25536.6	15700		25542.2	16000
		26578	6900		31355.5	7880		31677	210000		25536.9	15300		25542.5	14300
		26579	5990		31355.6	7900		31678	222000		25537.2	14800		25542.8	12700
		26580	5240		31355.7	7910		31679	234000		25537.6	14200		25543.2	11200
		26581	4730		31355.8	7920		31680	236000		25537.9	13700		25543.5	10100
		26582	4530		31355.9	7920		31681	229000		25538.2	13100		25543.8	9560
		26583	4660		31356	7920		31682	222000		25538.6	12600		25544.2	10000
		26584	4990		31356.1	7910		31683	210000		25538.9	12100		25544.5	12700
		26585	5440		31356.2	7900		31684	196000		25539.2	11700		25544.8	17900
		26586	6070		31356.3	7880		31685	176000		25539.6	11300		25545.2	22500
		26587	7020		31356.4	7860		31686	149000		25539.9	11000		25545.5	22500
		26588	8300		31356.5	7840		31687	133000		25540.2	10800		25545.8	18000
		26589	9520		31356.6	7800		31688	136000		25540.5	10600		25546.2	13200
		26590	10100		31356.7	7770		31689	169000		25540.9	10500		25546.5	10800
		26591	9690		31356.8	7730		31690	214000		25541.2	10400		25546.8	10300
		26592	8700		31356.9	7680		31691	251000		25541.5	10500		25547.1	10600
		26593	7620		31357	7630		31692	281000		25541.9	10700		25547.5	11300
		26594	6810		31357.1	7580		31693	271000		25542.2	11000		25547.8	12200
		26595	6360		31357.2	7520		31694	230000		25542.5	11500		25548.1	13200
		26596	6220		31357.3	7460		31695	217000		25542.8	12000		25548.5	13800
		26597	6390		31357.4	7400		31696	225000		25543.2	12400		25548.8	14000
		26598	6790		31357.5	7330		31697	211000		25543.5	12600		25549.1	13800
		26599	7090		31357.6	7260		31698	173000		25543.8	12600		25549.5	13500
		26600	7070		31357.7	7190		31699	139000		25544.2	12400		25549.8	13200
		26601	6850		31357.8	7110		31700	128000		25544.5	12100		25550.1	13100
		26602	6690		31357.9	7030		31701	137000		25544.8	11700		25550.4	13200
		26603	6660		31358	6950		31702	165000		25545.2	11200		25550.8	13500
		26604	6690		31358.1	6870		31703	209000		25545.5	10800		25551.1	13900
		26605	6530		31358.2	6780		31704	239000		25545.8	10300		25551.4	14600
		26606	6060		31358.3	6700		31705	235000		25546.2	9960		25551.8	15400
		26607	5590		31358.4	6610		31706	211000		25546.5	9690		25552.1	16400
		26608	5390		31358.5	6520		31707	183000		25546.8	9500		25552.4	17500
		26609	5340		31358.6	6430		31708	161000		25547.1	9390		25552.8	18800
		26610	5230		31358.7	6340		31709	152000		25547.5	9330		25553.1	20000
		26611	5210		31358.8	6250		31710	155000		25547.8	9290		25553.4	21200
		26612	5540		31358.9	6160		31711	166000		25548.1	9260		25553.7	22100
		26613	6260		31359	6060		31712	181000		25548.5	9230		25554.1	22700
		26614	7040		31359.1	5970		31713	194000		25548.8	9210		25554.4	22800
		26615	7640		31359.2	5880		31714	210000		25549.1	9190		25554.7	22300
		26616	8440		31359.3	5790		31715	222000		25549.5	9160		25555.1	20900
		26617	10100		31359.4	5700		31716	216000		25549.8	9140		25555.4	19000
		26618	12700		31359.5	5610		31717	194000		25550.1	9130		25555.7	16800
		26619	14700		31359.6	5520		31718	174000		25550.4	9190		25556.1	14700
		26620	14500		31359.7	5430		31719	169000		25550.8	9330		25556.4	12800
		26621	12000		31359.8	5350		31720	172000		25551.1	9570		25556.7	11100
		26622	8650		31359.9	5260		31721	177000		25551.4	9940		25557	9630
		26623	6320		31360	5180		31722	180000		25551.8	10400		25557.4	8380
		26624	5400		31360.1	5100		31723	172000		25552.1	11000		25557.7	7360
		26625	5160		31360.2	5020		31724	170000		25552.4	11700		25558	6590
		26626	4670		31360.3	4950		31725	189000		25552.8	12500		25558.4	6090
		26627	3900		31360.4	4870		31726	213000		25553.1	13300		25558.7	5900
		26628	3450		31360.5	4800		31727	223000		25553.4	14200		25559	6020
		26629	3640		31360.6	4730		31728	215000		25553.7	15100		25559.3	6430
		26630	4440		31360.7	4660		31729	195000		25554.1	16000		25559.7	7160
		26631	5730		31360.8	4600		31730	172000		25554.4	16700		25560	8230
		26632	7280		31360.9	4540		31731	184000		25554.7	17300		25560.3	9670
		26633	8610		31361	4470		31732	230000		25555.1	17500		25560.7	11500
		26634	9290		31361.1	4420		31733	257000		25555.4	17500		25561	13600
		26635	9630		31361.2	4360		31734	251000		25555.7	17200		25561.3	16000
		26636	10300		31361.3	4310		31735	234000		25556.1	16600		25561.7	18500
		26637	11400		31361.4	4260		31736	237000		25556.4	15800		25562	20900
		26638	11800		31361.5	4210		31737	245000		25556.7	14900		25562.3	23000
		26639	10400		31361.6	4160		31738	232000		25557	13900		25562.7	24200
		26640	7700		31361.7	4120		31739	209000		25557.4	12900		25563	24300
		26641	5250		31361.8	4070		31740	187000		25557.7	11900		25563.3	23300
		26642	4010		31361.9	4030		31741	168000		25558	11000		25563.6	21500
		26643	3680		31362	4000		31742	149000		25558.4	10100		25564	19600
		26644	3670		31362.1	3960		31743	135000		25558.7	9340		25564.3	17700
		26645	3710		31362.2	3930		31744	136000		25559	8730		25564.6	16000
		26646	3700		31362.3	3890		31745	153000		25559.3	8280		25565	14500
		26647	3630		31362.4	3860		31746	181000		25559.7	8000		25565.3	13000
		26648	3660		31362.5	3840		31747	218000		25560	7870		25565.6	11700
		26649	3960		31362.6	3810		31748	249000		25560.3	7870		25566	10400
		26650	4610		31362.7	3780		31749	254000		25560.7	7950		25566.3	9270
		26651	5560		31362.8	3760		31750	229000		25561	8070		25566.6	8210
		26652	6790		31362.9	3740		31751	191000		25561.3	8200		25566.9	7340
		26653	8420		31363	3720		31752	156000		25561.7	8340		25567.3	6740
		26654	10500		31363.1	3700		31753	136000		25562	8500		25567.6	6510
		26655	12600		31363.2	3680		31754	132000		25562.3	8670		25567.9	6750
		26656	14000		31363.3	3670		31755	140000		25562.7	8880		25568.3	7540
		26657	14100		31363.4	3650		31756	153000		25563	9110		25568.6	8880
		26658	12900		31363.5	3640		31757	164000		25563.3	9350		25568.9	10500
		26659	10800		31363.6	3620		31758	179000		25563.6	9560		25569.2	12000
		26660	8450		31363.7	3610		31759	209000		25564	9730		25569.6	13000
		26661	6430		31363.8	3600		31760	248000		25564.3	9850		25569.9	13200
		26662	4920		31363.9	3590		31761	266000		25564.6	9940		25570.2	13200
		26663	3810		31364	3580		31762	285000		25565	10000		25570.6	13000
		26664	3040		31364.1	3570		31763	293000		25565.3	10100		25570.9	12700
		26665	2610		31364.2	3570		31764	259000		25565.6	10200		25571.2	11900
		26666	2580		31364.3	3560		31765	227000		25566	10400		25571.6	11000
		26667	2950		31364.4	3560		31766	188000		25566.3	10700		25571.9	10100
		26668	3720		31364.5	3550		31767	148000		25566.6	11100		25572.2	9690
		26669	4910		31364.6	3550		31768	151000		25566.9	11700		25572.6	9910
		26670	6520		31364.7	3550		31769	173000		25567.3	12400		25572.9	10500
		26671	8410		31364.8	3550		31770	182000		25567.6	13100		25573.2	11300
		26672	10000		31364.9	3540		31771	184000		25567.9	14000		25573.5	12200
		26673	10700		31365	3540		31772	192000		25568.3	14900		25573.9	13800
		26674	10400		31365.1	3550		31773	192000		25568.6	16000		25574.2	18600
		26675	9950		31365.2	3550		31774	177000		25568.9	17100		25574.5	30800
		26676	9570		31365.3	3550		31775	157000		25569.2	18400		25574.9	48100
		26677	9050		31365.4	3550		31776	143000		25569.6	19900		25575.2	57700
		26678	8240		31365.5	3550		31777	140000		25569.9	21400		25575.5	55400
		26679	7330		31365.6	3560		31778	145000		25570.2	23000		25575.8	49900
		26680	6720		31365.7	3560		31779	156000		25570.6	24400		25576.2	46100
		26681	6740		31365.8	3570		31780	176000		25570.9	25700		25576.5	46200
		26682	7400		31365.9	3570		31781	201000		25571.2	26800		25576.8	60700
		26683	8320		31366	3580		31782	226000		25571.6	27700		25577.2	84100
		26684	8860		31366.1	3580		31783	253000		25571.9	28300		25577.5	85900
		26685	8610		31366.2	3590		31784	256000		25572.2	28700		25577.8	59900
		26686	7780		31366.3	3600		31785	226000		25572.6	29100		25578.2	35500
		26687	6830		31366.4	3600		31786	190000		25572.9	29500		25578.5	26500
		26688	5950		31366.5	3610		31787	165000		25573.2	30100		25578.8	24400
		26689	5190		31366.6	3620		31788	165000		25573.5	30800		25579.2	23100
		26690	4630		31366.7	3630		31789	182000		25573.9	31600		25579.5	21800
		26691	4380		31366.8	3640		31790	186000		25574.2	31800		25579.8	20400
		26692	4490		31366.9	3650		31791	181000		25574.5	31200		25580.1	19000
		26693	5110		31367	3660		31792	179000		25574.9	29600		25580.5	17900
		26694	6400		31367.1	3660		31793	183000		25575.2	27700		25580.8	17100
		26695	8270		31367.2	3670		31794	194000		25575.5	26600		25581.1	16600
		26696	10400		31367.3	3680		31795	207000		25575.8	27100		25581.5	16400
		26697	12500		31367.4	3700		31796	224000		25576.2	29400		25581.8	16100
		26698	14300		31367.5	3710		31797	226000		25576.5	32200		25582.1	15300
		26699	15300		31367.6	3720		31798	192000		25576.8	33600		25582.5	14100
		26700	14600		31367.7	3730		31799	165000		25577.2	32100		25582.8	12900
		26701	12000		31367.8	3740		31800	158000		25577.5	27900		25583.1	11800
		26702	8960		31367.9	3750		31801	156000		25577.8	22700		25583.4	10900
		26703	6790		31368	3770		31802	160000		25578.2	18000		25583.8	10200
		26704	5580		31368.1	3780		31803	172000		25578.5	14900		25584.1	9560
		26705	4910		31368.2	3790		31804	193000		25578.8	13200		25584.4	9070
		26706	4500		31368.3	3800		31805	210000		25579.2	12200		25584.8	8720
		26707	4220		31368.4	3820		31806	207000		25579.5	11700		25585.1	8490
		26708	3970		31368.5	3830		31807	188000		25579.8	11300		25585.4	8380
		26709	3830		31368.6	3850		31808	166000		25580.1	11000		25585.8	8430
		26710	4080		31368.7	3860		31809	151000		25580.5	10800		25586.1	8730
		26711	4980		31368.8	3880		31810	148000		25580.8	10600		25586.4	9400
		26712	6730		31368.9	3890		31811	161000		25581.1	10600		25586.7	10400
		26713	9370		31369	3910		31812	176000		25581.5	10500		25587.1	11800
		26714	12600		31369.1	3930		31813	182000		25581.8	10600		25587.4	13300
		26715	15400		31369.2	3950		31814	184000		25582.1	10800		25587.7	14800
		26716	16300		31369.3	3960		31815	183000		25582.5	10900		25588.1	16000
		26717	14700		31369.4	3980		31816	173000		25582.8	11200		25588.4	16800
		26718	11600		31369.5	4000		31817	163000		25583.1	11500		25588.7	17400
		26719	8660		31369.6	4020		31818	161000		25583.4	11900		25589.1	17900
		26720	6730		31369.7	4040		31819	167000		25583.8	12300		25589.4	18200
		26721	5630		31369.8	4070		31820	171000		25584.1	12900		25589.7	18400
		26722	5050		31369.9	4090		31821	170000		25584.4	13500		25590	18300
		26723	4950		31370	4110		31822	171000		25584.8	14300		25590.4	18100
		26724	5390		31370.1	4140		31823	175000		25585.1	15200		25590.7	17700
		26725	6150		31370.2	4160		31824	176000		25585.4	16200		25591	17300
		26726	6730		31370.3	4190		31825	177000		25585.8	17300		25591.4	16900
		26727	6990		31370.4	4220		31826	173000		25586.1	18400		25591.7	16500
		26728	7260		31370.5	4250		31827	155000		25586.4	19500		25592	16200
		26729	7800		31370.6	4280		31828	147000		25586.7	20500		25592.3	16100
		26730	8510		31370.7	4310		31829	163000		25587.1	21500		25592.7	16100
		26731	9130		31370.8	4340		31830	189000		25587.4	22500		25593	16600
		26732	9580		31370.9	4380		31831	205000		25587.7	23400		25593.3	17700
		26733	9900		31371	4410		31832	204000		25588.1	24100		25593.7	20900
		26734	9940		31371.1	4450		31833	204000		25588.4	24800		25594	27400
		26735	9520		31371.2	4490		31834	237000		25588.7	25200		25594.3	34400
		26736	8620		31371.3	4520		31835	272000		25589.1	25300		25594.7	35700
		26737	7550		31371.4	4560		31836	240000		25589.4	25200		25595	29800
		26738	6690		31371.5	4610		31837	190000		25589.7	24700		25595.3	22600
		26739	6220		31371.6	4650		31838	169000		25590	23800		25595.7	18500
		26740	5930		31371.7	4690		31839	163000		25590.4	22600		25596	17200
		26741	5430		31371.8	4740		31840	162000		25590.7	21100		25596.3	16900
		26742	4780		31371.9	4790		31841	163000		25591	19600		25596.6	16600
		26743	4440		31372	4840		31842	162000		25591.4	18100		25597	16400
		26744	4690		31372.1	4890		31843	158000		25591.7	16800		25597.3	16200
		26745	5390		31372.2	4940		31844	156000		25592	16000		25597.6	15900
		26746	6210		31372.3	5000		31845	162000		25592.3	15700		25598	15700
		26747	6750		31372.4	5050		31846	175000		25592.7	16100		25598.3	15400
		26748	6860		31372.5	5110		31847	184000		25593	17000		25598.6	15000
		26749	6730		31372.6	5170		31848	199000		25593.3	18100		25599	14500
		26750	6740		31372.7	5240		31849	216000		25593.7	18800		25599.3	13900
		26751	7180		31372.8	5300		31850	207000		25594	18900		25599.6	13200
		26752	8160		31372.9	5370		31851	191000		25594.3	18300		25599.9	12600
		26753	9590		31373	5440		31852	183000		25594.7	17400		25600.3	11900
		26754	11000		31373.1	5510		31853	173000		25595	16400		25600.6	11400
		26755	11800		31373.2	5590		31854	166000		25595.3	15700		25600.9	11200
		26756	11200		31373.3	5670		31855	162000		25595.7	15300		25601.3	11200
		26757	9510		31373.4	5750		31856	159000		25596	15100		25601.6	11400
		26758	7530		31373.5	5830		31857	159000		25596.3	14900		25601.9	11700
		26759	6100		31373.6	5920		31858	166000		25596.6	14700		25602.2	11900
		26760	5550		31373.7	6010		31859	181000		25597	14500		25602.6	12000
		26761	5780		31373.8	6100		31860	198000		25597.3	14300		25602.9	12000
		26762	6450		31373.9	6200		31861	211000		25597.6	14200		25603.2	12100
		26763	7180		31374	6290		31862	216000		25598	14100		25603.6	12200
		26764	7640		31374.1	6390		31863	199000		25598.3	14200		25603.9	12600
		26765	7740		31374.2	6490		31864	178000		25598.6	14400		25604.2	13300
		26766	7570		31374.3	6600		31865	172000		25599	14700		25604.6	14200
		26767	7180		31374.4	6700		31866	173000		25599.3	15000		25604.9	15400
		26768	6620		31374.5	6810		31867	175000		25599.6	15100		25605.2	16500
		26769	6040		31374.6	6920		31868	178000		25599.9	15100		25605.6	17700
		26770	5560		31374.7	7030		31869	181000		25600.3	15000		25605.9	19000
		26771	5440		31374.8	7140		31870	184000		25600.6	14900		25606.2	20600
		26772	6090		31374.9	7250		31871	186000		25600.9	15000		25606.5	23200
		26773	7670		31375	7360		31872	189000		25601.3	15100		25606.9	27100
		26774	9520		31375.1	7480		31873	194000		25601.6	15200		25607.2	31900
		26775	10700		31375.2	7590		31874	194000		25601.9	15300		25607.5	36000
		26776	10900		31375.3	7700		31875	191000		25602.2	15300		25607.9	37400
		26777	10800		31375.4	7820		31876	205000		25602.6	15400		25608.2	35100
		26778	10800		31375.5	7930		31877	210000		25602.9	15400		25608.5	30000
		26779	10100		31375.6	8040		31878	174000		25603.2	15400		25608.8	24100
		26780	8610		31375.7	8150		31879	144000		25603.6	15500		25609.2	19200
		26781	6820		31375.8	8250		31880	143000		25603.9	15600		25609.5	15900
		26782	5320		31375.9	8360		31881	153000		25604.2	15800		25609.8	13800
		26783	4330		31376	8460		31882	179000		25604.6	16100		25610.2	12300
		26784	3800		31376.1	8550		31883	216000		25604.9	16400		25610.5	11100
		26785	3670		31376.2	8650		31884	229000		25605.2	16700		25610.8	10200
		26786	3880		31376.3	8730		31885	205000		25605.6	17100		25611.2	9540
		26787	4340		31376.4	8820		31886	179000		25605.9	17500		25611.5	9280
		26788	5080		31376.5	8900		31887	175000		25606.2	17800		25611.8	9400
		26789	6230		31376.6	8970		31888	182000		25606.5	18100		25612.2	9860
		26790	7740		31376.7	9040		31889	178000		25606.9	18200		25612.5	10600
		26791	9130		31376.8	9100		31890	165000		25607.2	18300		25612.8	11700
		26792	9860		31376.9	9150		31891	155000		25607.5	18200		25613.1	13100
		26793	9780		31377	9200		31892	153000		25607.9	18100		25613.5	14900
		26794	9130		31377.1	9240		31893	162000		25608.2	17800		25613.8	17000
		26795	8140		31377.2	9280		31894	174000		25608.5	17400		25614.1	19400
		26796	7000		31377.3	9300		31895	173000		25608.8	17000		25614.5	21800
		26797	5930		31377.4	9320		31896	163000		25609.2	16400		25614.8	23400
		26798	5180		31377.5	9330		31897	155000		25609.5	15800		25615.1	24000
		26799	4840		31377.6	9330		31898	156000		25609.8	15100		25615.5	23900
		26800	5010		31377.7	9330		31899	160000		25610.2	14400		25615.8	23500
		26801	5920		31377.8	9320		31900	167000		25610.5	13600		25616.1	22800
		26802	7590		31377.9	9300		31901	173000		25610.8	12900		25616.4	21600
		26803	9340		31378	9270		31902	172000		25611.2	12200		25616.8	20100
		26804	10100		31378.1	9230		31903	163000		25611.5	11600		25617.1	18100
		26805	9500		31378.2	9190		31904	150000		25611.8	11000		25617.4	16000
		26806	8170		31378.3	9140		31905	142000		25612.2	10600		25617.8	13900
		26807	7330		31378.4	9080		31906	140000		25612.5	10200		25618.1	11900
		26808	7520		31378.5	9020		31907	141000		25612.8	10000		25618.4	10100
		26809	8310		31378.6	8950		31908	152000		25613.1	9970		25618.8	8790
		26810	8960		31378.7	8870		31909	168000		25613.5	10100		25619.1	7940
		26811	9000		31378.8	8780		31910	181000		25613.8	10400		25619.4	7730
		26812	8490		31378.9	8700		31911	192000		25614.1	10700		25619.7	8250
		26813	7800		31379	8600		31912	215000		25614.5	10900		25620.1	9750
		26814	7290		31379.1	8500		31913	222000		25614.8	11000		25620.4	17200
		26815	7060		31379.2	8400		31914	184000		25615.1	10900		25620.7	46500
		26816	7040		31379.3	8290		31915	153000		25615.5	10700		25621.1	99300
		26817	7070		31379.4	8180		31916	151000		25615.8	10700		25621.4	128000
		26818	6910		31379.5	8060		31917	155000		25616.1	10900		25621.7	97200
		26819	6440		31379.6	7940		31918	156000		25616.4	11200		25622.1	45900
		26820	5780		31379.7	7820		31919	150000		25616.8	11600		25622.4	19200
		26821	5250		31379.8	7700		31920	139000		25617.1	12000		25622.7	13300
		26822	5120		31379.9	7570		31921	134000		25617.4	12400		25623	13100
		26823	5490		31380	7440		31922	138000		25617.8	12800		25623.4	13500
		26824	6370		31380.1	7320		31923	146000		25618.1	13500		25623.7	14000
		26825	7800		31380.2	7190		31924	155000		25618.4	14500		25624	14400
		26826	9540		31380.3	7060		31925	162000		25618.8	16000		25624.4	14800
		26827	10700		31380.4	6930		31926	167000		25619.1	18200		25624.7	15300
		26828	10900		31380.5	6800		31927	166000		25619.4	21100		25625	15900
		26829	10300		31380.6	6670		31928	163000		25619.7	25300		25625.3	16600
		26830	9410		31380.7	6540		31929	164000		25620.1	30800		25625.7	17400
		26831	8480		31380.8	6410		31930	161000		25620.4	36600		25626	18000
		26832	7690		31380.9	6290		31931	155000		25620.7	40700		25626.3	18200
		26833	7170		31381	6160		31932	152000		25621.1	40900		25626.7	17800
		26834	6940		31381.1	6040		31933	145000		25621.4	36800		25627	16900
		26835	7010		31381.2	5920		31934	152000		25621.7	30000		25627.3	15700
		26836	7420		31381.3	5810		31935	176000		25622.1	23300		25627.7	14500
		26837	7920		31381.4	5690		31936	196000		25622.4	18300		25628	13400
		26838	7860		31381.5	5580		31937	195000		25622.7	15400		25628.3	12500
		26839	7120		31381.6	5480		31938	176000		25623	14000		25628.7	11900
		26840	6410		31381.7	5370		31939	156000		25623.4	13400		25629	11600
		26841	6090		31381.8	5270		31940	138000		25623.7	13100		25629.3	11500
		26842	5770		31381.9	5170		31941	119000		25624	12800		25629.6	11400
		26843	5070		31382	5080		31942	104000		25624.4	12600		25630	11200
		26844	4190		31382.1	4990		31943	97800		25624.7	12400		25630.3	10700
		26845	3650		31382.2	4900		31944	102000		25625	12200		25630.6	10100
		26846	3710		31382.3	4820		31945	117000		25625.3	12100		25631	9340
		26847	4220		31382.4	4730		31946	146000		25625.7	12000		25631.3	8610
		26848	4970		31382.5	4660		31947	183000		25626	11800		25631.6	7950
		26849	5990		31382.6	4580		31948	210000		25626.3	11700		25632	7400
		26850	7450		31382.7	4510		31949	206000		25626.7	11500		25632.3	7030
		26851	8970		31382.8	4440		31950	178000		25627	11400		25632.6	6820
		26852	9470		31382.9	4380		31951	146000		25627.3	11200		25632.9	6760
		26853	8820		31383	4320		31952	121000		25627.7	11100		25633.3	6840
		26854	8430		31383.1	4260		31953	108000		25628	11000		25633.6	7030
		26855	9250		31383.2	4200		31954	114000		25628.3	11100		25633.9	7350
		26856	10600		31383.3	4150		31955	132000		25628.7	11100		25634.3	7850
		26857	11200		31383.4	4100		31956	146000		25629	11200		25634.6	8660
		26858	10400		31383.5	4050		31957	167000		25629.3	11300		25634.9	9900
		26859	8930		31383.6	4000		31958	190000		25629.6	11200		25635.2	11700
		26860	7800		31383.7	3960		31959	190000		25630	11100		25635.6	13800
		26861	7730		31383.8	3920		31960	195000		25630.3	10900		25635.9	15900
		26862	8480		31383.9	3880		31961	211000		25630.6	10500		25636.2	17300
		26863	8830		31384	3850		31962	198000		25631	10200		25636.6	17800
		26864	7990		31384.1	3810		31963	167000		25631.3	9840		25636.9	17700
		26865	6280		31384.2	3780		31964	147000		25631.6	9500		25637.2	17400
		26866	4410		31384.3	3750		31965	138000		25632	9200		25637.6	17100
		26867	2980		31384.4	3730		31966	135000		25632.3	8950		25637.9	16800
		26868	2300		31384.5	3700		31967	135000		25632.6	8800		25638.2	16500
		26869	2350		31384.6	3680		31968	136000		25632.9	8760		25638.6	16100
		26870	3260		31384.7	3660		31969	136000		25633.3	8840		25638.9	15700
		26871	5600		31384.8	3640		31970	138000		25633.6	9020		25639.2	15200
		26872	9820		31384.9	3620		31971	144000		25633.9	9290		25639.5	14600
		26873	14600		31385	3600		31972	154000		25634.3	9600		25639.9	14000
		26874	17000		31385.1	3590		31973	167000		25634.6	9890		25640.2	13300
		26875	16000		31385.2	3580		31974	172000		25634.9	10100		25640.5	12700
		26876	13400		31385.3	3570		31975	161000		25635.2	10400		25640.9	12100
		26877	10900		31385.4	3560		31976	144000		25635.6	10500		25641.2	11500
		26878	8970		31385.5	3550		31977	132000		25635.9	10700		25641.5	11200
		26879	7650		31385.6	3540		31978	125000		25636.2	10800		25641.8	11100
		26880	6780		31385.7	3540		31979	124000		25636.6	10800		25642.2	11200
		26881	6220		31385.8	3530		31980	134000		25636.9	10800		25642.5	11400
		26882	5770		31385.9	3530		31981	149000		25637.2	10800		25642.8	11800
		26883	5270		31386	3530		31982	156000		25637.6	10900		25643.2	13300
		26884	4790		31386.1	3530		31983	154000		25637.9	11100		25643.5	17600
		26885	4560		31386.2	3530		31984	155000		25638.2	11400		25643.8	24900
		26886	4870		31386.3	3530		31985	157000		25638.6	11700		25644.2	31100
		26887	5990		31386.4	3530		31986	153000		25638.9	12000		25644.5	31700
		26888	8090		31386.5	3530		31987	149000		25639.2	12400		25644.8	26100
		26889	10700		31386.6	3530		31988	152000		25639.5	12700		25645.2	18300
		26890	12400		31386.7	3530		31989	158000		25639.9	12900		25645.5	12200
		26891	12400		31386.8	3530		31990	156000		25640.2	13200		25645.8	9190
		26892	11000		31386.9	3530		31991	140000		25640.5	13400		25646.1	8420
		26893	8920		31387	3530		31992	122000		25640.9	13700		25646.5	8500
		26894	6460		31387.1	3530		31993	111000		25641.2	14300		25646.8	8760
		26895	4410		31387.2	3530		31994	109000		25641.5	15100		25647.1	8960
		26896	3320		31387.3	3540		31995	114000		25641.8	16500		25647.5	9080
		26897	3010		31387.4	3540		31996	118000		25642.2	18400		25647.8	9170
		26898	3140		31387.5	3540		31997	119000		25642.5	20900		25648.1	9290
		26899	3600		31387.6	3540		31998	123000		25642.8	23300		25648.5	9440
		26900	4330		31387.7	3540		31999	133000		25643.2	25300		25648.8	9600
		26901	5410		31387.8	3540		32000	150000		25643.5	26100		25649.1	9780
		26902	6900		31387.9	3550		32001	178000		25643.8	25500		25649.4	10000
		26903	8540		31388	3550		32002	208000		25644.2	23500		25649.8	10300
		26904	9900		31388.1	3550		32003	209000		25644.5	20600		25650.1	10800
		26905	10700		31388.2	3560		32004	182000		25644.8	17500		25650.4	11400
		26906	10700		31388.3	3560		32005	144000		25645.2	14600		25650.8	12100
		26907	9830		31388.4	3560		32006	111000		25645.5	12300		25651.1	12900
		26908	8340		31388.5	3570		32007	95500		25645.8	10600		25651.4	13600
		26909	6550		31388.6	3580		32008	116000		25646.1	9520		25651.8	14300
		26910	4980		31388.7	3580		32009	154000		25646.5	8850		25652.1	14900
		26911	3990		31388.8	3590		32010	166000		25646.8	8490		25652.4	15500
		26912	3640		31388.9	3600		32011	182000		25647.1	8340		25652.7	16000
		26913	3810		31389	3610		32012	213000		25647.5	8330		25653.1	16200
		26914	4350		31389.1	3610		32013	202000		25647.8	8440		25653.4	15800
		26915	5200		31389.2	3620		32014	157000		25648.1	8650		25653.7	15000
		26916	6490		31389.3	3640		32015	125000		25648.5	8950		25654.1	14200
		26917	8530		31389.4	3650		32016	116000		25648.8	9330		25654.4	13600
		26918	11400		31389.5	3660		32017	127000		25649.1	9750		25654.7	13000
		26919	13900		31389.6	3670		32018	140000		25649.4	10200		25655.1	12700
		26920	14500		31389.7	3690		32019	136000		25649.8	10600		25655.4	12800
		26921	12500		31389.8	3700		32020	134000		25650.1	11000		25655.7	13200
		26922	9430		31389.9	3720		32021	139000		25650.4	11300		25656	14000
		26923	6900		31390	3730		32022	142000		25650.8	11400		25656.4	14800
		26924	5290		31390.1	3750		32023	144000		25651.1	11500		25656.7	15100
		26925	4350		31390.2	3770		32024	146000		25651.4	11400		25657	14600
		26926	3920		31390.3	3790		32025	149000		25651.8	11300		25657.4	13500
		26927	4000		31390.4	3810		32026	153000		25652.1	11100		25657.7	12200
		26928	4460		31390.5	3830		32027	155000		25652.4	10900		25658	11300
		26929	4960		31390.6	3860		32028	149000		25652.7	10900		25658.3	11000
		26930	5250		31390.7	3880		32029	139000		25653.1	10900		25658.7	11100
		26931	5360		31390.8	3910		32030	136000		25653.4	11000		25659	11100
		26932	5420		31390.9	3930		32031	134000		25653.7	11200		25659.3	11400
		26933	5600		31391	3960		32032	125000		25654.1	11300		25659.7	12500
		26934	6190		31391.1	3990		32033	121000		25654.4	11300		25660	14200
		26935	7350		31391.2	4030		32034	129000		25654.7	11200		25660.3	15200
		26936	8860		31391.3	4060		32035	145000		25655.1	11000		25660.7	14400
		26937	10300		31391.4	4090		32036	159000		25655.4	10900		25661	12200
		26938	11200		31391.5	4130		32037	158000		25655.7	10800		25661.3	9750
		26939	10700		31391.6	4170		32038	149000		25656	10900		25661.7	8280
		26940	9290		31391.7	4210		32039	149000		25656.4	11200		25662	7920
		26941	7660		31391.8	4250		32040	160000		25656.7	11600		25662.3	8310
		26942	6510		31391.9	4290		32041	170000		25657	12100		25662.6	9280
		26943	5880		31392	4330		32042	169000		25657.4	12600		25663	12500
		26944	5440		31392.1	4380		32043	155000		25657.7	13300		25663.3	24700
		26945	4970		31392.2	4430		32044	138000		25658	13900		25663.6	52300
		26946	4500		31392.3	4480		32045	136000		25658.3	14600		25664	78900
		26947	4460		31392.4	4530		32046	147000		25658.7	15200		25664.3	75600
		26948	5150		31392.5	4590		32047	146000		25659	15900		25664.6	47200
		26949	5950		31392.6	4640		32048	137000		25659.3	16500		25665	23800
		26950	5950		31392.7	4700		32049	138000		25659.7	16900		25665.3	15300
		26951	5650		31392.8	4760		32050	141000		25660	17100		25665.6	13100
		26952	6160		31392.9	4820		32051	134000		25660.3	17000		25665.9	11800
		26953	7460		31393	4890		32052	125000		25660.7	16700		25666.3	10900
		26954	8640		31393.1	4960		32053	125000		25661	16100		25666.6	10400
		26955	9280		31393.2	5030		32054	129000		25661.3	15400		25666.9	10200
		26956	9710		31393.3	5100		32055	133000		25661.7	14600		25667.3	10400
		26957	10100		31393.4	5180		32056	136000		25662	14100		25667.6	11000
		26958	10300		31393.5	5260		32057	148000		25662.3	14200		25667.9	11600
		26959	9930		31393.6	5340		32058	163000		25662.6	15000		25668.2	11500
		26960	9030		31393.7	5420		32059	161000		25663	16600		25668.6	11000
		26961	7740		31393.8	5510		32060	145000		25663.3	18600		25668.9	10800
		26962	6250		31393.9	5600		32061	129000		25663.6	20300		25669.2	11100
		26963	4890		31394	5690		32062	116000		25664	21000		25669.6	11400
		26964	4000		31394.1	5790		32063	110000		25664.3	20400		25669.9	11600
		26965	3680		31394.2	5890		32064	117000		25664.6	18900		25670.2	11700
		26966	3750		31394.3	5990		32065	131000		25665	17000		25670.6	11500
		26967	4030		31394.4	6090		32066	141000		25665.3	15300		25670.9	11300
		26968	4430		31394.5	6200		32067	141000		25665.6	13700		25671.2	10800
		26969	4980		31394.6	6310		32068	134000		25665.9	12500		25671.6	10100
		26970	5780		31394.7	6420		32069	125000		25666.3	11600		25671.9	9240
		26971	6790		31394.8	6530		32070	115000		25666.6	11200		25672.2	8500
		26972	7750		31394.9	6650		32071	111000		25666.9	11400		25672.5	7930
		26973	8410		31395	6760		32072	130000		25667.3	11700		25672.9	7520
		26974	8680		31395.1	6880		32073	151000		25667.6	12200		25673.2	7240
		26975	8550		31395.2	7000		32074	143000		25667.9	12400		25673.5	7070
		26976	8040		31395.3	7120		32075	139000		25668.2	12500		25673.9	6980
		26977	7410		31395.4	7250		32076	147000		25668.6	12300		25674.2	6980
		26978	7050		31395.5	7370		32077	150000		25668.9	12100		25674.5	7020
		26979	7160		31395.6	7500		32078	149000		25669.2	11900		25674.8	7100
		26980	7630		31395.7	7620		32079	145000		25669.6	11600		25675.2	7180
		26981	8280		31395.8	7750		32080	141000		25669.9	11400		25675.5	7250
		26982	8870		31395.9	7870		32081	137000		25670.2	11100		25675.8	7330
		26983	9220		31396	7990		32082	130000		25670.6	10800		25676.2	7440
		26984	9140		31396.1	8110		32083	127000		25670.9	10400		25676.5	7630
		26985	8590		31396.2	8230		32084	126000		25671.2	9980		25676.8	7900
		26986	7750		31396.3	8350		32085	115000		25671.6	9580		25677.2	8250
		26987	6950		31396.4	8470		32086	105000		25671.9	9210		25677.5	8690
		26988	6410		31396.5	8580		32087	106000		25672.2	8900		25677.8	9240
		26989	6130		31396.6	8690		32088	117000		25672.5	8670		25678.2	9920
		26990	6050		31396.7	8790		32089	133000		25672.9	8530		25678.5	10800
		26991	6120		31396.8	8890		32090	143000		25673.2	8470		25678.8	11900
		26992	6110		31396.9	8980		32091	144000		25673.5	8470		25679.1	13100
		26993	5870		31397	9070		32092	142000		25673.9	8510		25679.5	14100
		26994	5570		31397.1	9160		32093	135000		25674.2	8550		25679.8	14400
		26995	5360		31397.2	9230		32094	121000		25674.5	8550		25680.1	14200
		26996	5170		31397.3	9300		32095	109000		25674.8	8520		25680.5	13600
		26997	5050		31397.4	9360		32096	107000		25675.2	8480		25680.8	13000
		26998	5170		31397.5	9420		32097	115000		25675.5	8470		25681.1	12700
		26999	5700		31397.6	9460		32098	125000		25675.8	8530		25681.5	12500
		27000	6710		31397.7	9500		32099	131000		25676.2	8660		25681.8	12400
		27001	8190		31397.8	9530		32100	130000		25676.5	8870		25682.1	12400
		27002	10000		31397.9	9550		32101	127000		25676.8	9110		25682.4	12300
		27003	11800		31398	9560		32102	128000		25677.2	9340		25682.8	12200
		27004	13000		31398.1	9560		32103	135000		25677.5	9540		25683.1	11800
		27005	12700		31398.2	9560		32104	137000		25677.8	9690		25683.4	11300
		27006	11100		31398.3	9540		32105	127000		25678.2	9800		25683.8	10700
		27007	8840		31398.4	9510		32106	112000		25678.5	9900		25684.1	10200
		27008	6800		31398.5	9480		32107	107000		25678.8	10000		25684.4	9800
		27009	5290		31398.6	9430		32108	109000		25679.1	10100		25684.8	9650
		27010	4260		31398.7	9370		32109	106000		25679.5	10200		25685.1	9750
		27011	3580		31398.8	9310		32110	103000		25679.8	10300		25685.4	10100
		27012	3230		31398.9	9240		32111	105000		25680.1	10500		25685.7	10600
		27013	3250		31399	9160		32112	112000		25680.5	10600		25686.1	10900
		27014	3650		31399.1	9070		32113	120000		25680.8	10900		25686.4	10600
		27015	4390		31399.2	8970		32114	125000		25681.1	11200		25686.7	9740
		27016	5490		31399.3	8860		32115	127000		25681.5	11700		25687.1	8440
		27017	7060		31399.4	8750		32116	128000		25681.8	12500		25687.4	7190
		27018	9140		31399.5	8630		32117	128000		25682.1	13400		25687.7	6220
		27019	11200		31399.6	8510		32118	123000		25682.4	14600		25688.1	5520
		27020	12400		31399.7	8380		32119	116000		25682.8	15900		25688.4	5050
		27021	12000		31399.8	8250		32120	118000		25683.1	17300		25688.7	4740
		27022	10800		31399.9	8110		32121	136000		25683.4	18500		25689	4590
		27023	9580		31400	7970		32122	149000		25683.8	19400		25689.4	4580
		27024	8660		31400.1	7820		32123	140000		25684.1	19800		25689.7	4720
		27025	7900		31400.2	7680		32124	126000		25684.4	19700		25690	5000
		27026	7200		31400.3	7530		32125	119000		25684.8	19200		25690.4	5430
		27027	6640		31400.4	7380		32126	112000		25685.1	18300		25690.7	6000
		27028	6130		31400.5	7230		32127	104000		25685.4	17200		25691	6710
		27029	5420		31400.6	7080		32128	105000		25685.7	15900		25691.3	7580
[truncated: 44,605 more rows]
