# Supplementary material for: Allosteric coupling asymmetry mediates paradoxical activation of BRAF by type II inhibitors
Source: eLife journal article supplement (doi:10.7554/elife.95481), 2024-04-03
Supplement: fig4-figsupp1-data1 [file Figure4_figure supplement 1 - source data 1.xlsx]

## Sheet: Sheet1
a
	ppm	0 uM ATP	100 uM ATP	200 uM ATP	500 uM ATP	1 mM ATP	5 mM ATP
	-84.0624	0.00648	0.00532	-0.0064	0.0246	0.0184	-0.00207
	-84.0654	-0.00201	0.0132	0.00836	0.0241	0.0293	-0.00104
	-84.0684	0.0188	0.00073	0.0231	0.0236	0.0402	1.21e-06
	-84.0714	0.0258	0.00162	0.0208	0.0193	0.0351	0.00389
	-84.0744	0.00361	0.0229	0.0184	0.0149	0.03	0.00778
	-84.0774	-0.0102	0.0327	0.0121	0.00509	0.0309	0.0117
	-84.0804	-0.00642	0.0222	0.00584	-0.00474	0.0319	0.0156
	-84.0834	-0.0126	0.0164	-0.00433	0.00246	0.0183	0.0166
	-84.0864	-0.0188	0.0106	0.00631	0.00965	0.00462	0.0176
	-84.0894	-0.00342	0.00348	0.0105	0.00594	0.0192	0.0187
	-84.0924	0.012	-0.0036	0.0146	0.00222	0.0339	0.0197
	-84.0954	0.00981	-0.00579	0.00951	0.00919	0.031	0.0149
	-84.0984	0.00764	-0.00798	0.00443	0.0162	0.028	0.0101
	-84.1014	0.00547	0.00684	0.00455	0.0231	0.0335	0.0157
	-84.1044	0.0033	0.0216	0.00468	0.0301	0.0268	0.0213
	-84.1074	-0.000975	0.0252	0.0035	0.0255	0.00533	0.0147
	-84.1104	-0.00525	0.0287	0.00233	0.0208	0.00809	0.00817
	-84.1134	0.011	0.0153	0.015	0.0217	0.0247	0.0102
	-84.1164	0.0272	0.00185	0.00692	0.0225	0.0414	-0.000258
	-84.1194	0.029	0.0145	-0.00608	0.0198	0.0299	-0.00914
	-84.1224	0.0307	0.0272	0.0156	0.0171	0.0184	0.00687
	-84.1254	0.0237	0.0229	0.0464	0.024	0.0271	0.0159
	-84.1284	0.0167	0.0186	0.0426	0.0308	0.0358	1.21e-06
	-84.1314	0.0221	0.0155	0.0278	0.0418	0.0289	0.0106
	-84.1344	0.0275	0.0124	0.0131	0.0309	0.022	0.0212
	-84.1374	0.0241	0.00927	0.0136	0.00914	0.0252	0.00957
	-84.1404	0.0207	0.00616	0.014	0.00918	0.0284	-0.00211
	-84.1434	0.0215	0.0155	0.0262	0.00809	0.0389	0.00618
	-84.1464	0.0222	0.0248	0.0384	0.007	0.0494	0.0145
	-84.1494	0.0229	0.0171	0.0193	0.0168	0.0337	0.0165
	-84.1524	0.0237	0.00946	0.000259	0.0266	0.0179	0.0186
	-84.1554	0.0289	0.0126	0.013	0.0357	0.0216	0.0212
	-84.1584	0.034	0.0158	0.0258	0.0229	0.0253	0.0238
	-84.1614	0.0348	0.0138	0.0199	0.0224	0.029	0.0248
	-84.1644	0.0356	0.0119	0.014	0.0219	0.0327	0.0258
	-84.1674	0.0273	0.0252	0.0257	0.0245	0.0318	0.042
	-84.1704	0.019	0.0384	0.0166	0.027	0.0308	0.0333
	-84.1734	0.0313	0.0279	0.0113	0.0242	0.0298	0.0231
	-84.1764	0.0435	0.0173	0.0269	0.0213	0.0289	0.0377
	-84.1794	0.0395	0.0177	0.0427	0.0278	0.033	0.0455
	-84.1824	0.0355	0.0181	0.0377	0.0343	0.0371	0.0284
	-84.1854	0.0316	0.0184	0.0404	0.03	0.0397	0.0268
	-84.1884	0.0276	0.0188	0.0432	0.0256	0.0423	0.0252
	-84.1914	0.0344	0.0212	0.0417	0.032	0.0586	0.0144
	-84.1944	0.0412	0.0236	0.0403	0.0384	0.0507	0.00345
	-84.1974	0.0481	0.0209	0.0466	0.0339	0.0328	0.005
	-84.2004	0.0549	0.0182	0.0321	0.0295	0.039	0.00655
	-84.2034	0.0538	0.0192	0.0267	0.0433	0.0412	0.0242
	-84.2064	0.0527	0.0203	0.042	0.0571	0.0433	0.0418
	-84.2094	0.0516	0.0316	0.0574	0.0651	0.047	0.0454
	-84.2124	0.0505	0.0428	0.0519	0.0512	0.0506	0.049
	-84.2154	0.048	0.0458	0.0318	0.0503	0.0586	0.0625
	-84.2184	0.0456	0.0488	0.0325	0.0495	0.0665	0.0511
	-84.2214	0.0578	0.0568	0.0575	0.0528	0.0604	0.0397
	-84.2244	0.0699	0.0649	0.0616	0.056	0.0542	0.0532
	-84.2274	0.0703	0.0652	0.0626	0.0584	0.0619	0.0508
	-84.2304	0.0706	0.0654	0.0844	0.0608	0.0696	0.0484
	-84.2334	0.0753	0.0759	0.0828	0.0741	0.0757	0.0492
	-84.2364	0.0801	0.0863	0.0812	0.0874	0.0819	0.0499
	-84.2394	0.0966	0.0837	0.0936	0.0949	0.101	0.0424
	-84.2424	0.113	0.0811	0.106	0.102	0.0957	0.0597
	-84.2454	0.13	0.0954	0.105	0.11	0.0905	0.077
	-84.2484	0.146	0.11	0.125	0.117	0.11	0.0695
	-84.2514	0.159	0.136	0.159	0.138	0.131	0.0832
	-84.2544	0.172	0.163	0.172	0.159	0.153	0.0969
	-84.2574	0.199	0.18	0.181	0.167	0.154	0.108
	-84.2604	0.227	0.196	0.21	0.196	0.155	0.118
	-84.2634	0.265	0.228	0.245	0.238	0.18	0.146
	-84.2664	0.304	0.26	0.28	0.257	0.205	0.149
	-84.2694	0.335	0.31	0.305	0.283	0.21	0.162
	-84.2724	0.383	0.359	0.331	0.33	0.215	0.201
	-84.2754	0.43	0.383	0.368	0.369	0.245	0.214
	-84.2784	0.447	0.407	0.405	0.385	0.251	0.203
	-84.2814	0.436	0.387	0.394	0.38	0.225	0.195
	-84.2844	0.407	0.367	0.363	0.354	0.224	0.187
	-84.2874	0.376	0.334	0.323	0.317	0.23	0.179
	-84.2904	0.346	0.3	0.284	0.281	0.212	0.171
	-84.2934	0.314	0.277	0.253	0.254	0.195	0.151
	-84.2964	0.282	0.253	0.223	0.227	0.178	0.131
	-84.2994	0.247	0.22	0.196	0.193	0.159	0.135
	-84.3024	0.212	0.188	0.169	0.159	0.139	0.139
	-84.3054	0.193	0.172	0.16	0.143	0.134	0.122
	-84.3084	0.157	0.156	0.15	0.127	0.128	0.106
	-84.3114	0.127	0.143	0.145	0.127	0.122	0.0974
	-84.3144	0.137	0.129	0.14	0.127	0.116	0.0891
	-84.3174	0.149	0.12	0.124	0.116	0.0966	0.101
	-84.3204	0.131	0.112	0.108	0.106	0.101	0.114
	-84.3234	0.12	0.102	0.115	0.102	0.106	0.0946
	-84.3264	0.11	0.0912	0.122	0.098	0.11	0.0753
	-84.3294	0.112	0.0979	0.13	0.104	0.11	0.0851
	-84.3324	0.114	0.105	0.117	0.109	0.111	0.0948
	-84.3354	0.115	0.0918	0.0992	0.113	0.111	0.0916
	-84.3384	0.115	0.079	0.0812	0.0943	0.112	0.0885
	-84.3414	0.107	0.0832	0.0723	0.0828	0.112	0.0915
	-84.3444	0.0993	0.0874	0.0633	0.0713	0.112	0.0945
	-84.3474	0.0844	0.0848	0.067	0.0794	0.118	0.102
	-84.3504	0.0695	0.0822	0.0706	0.0875	0.124	0.11
	-84.3534	0.0868	0.0694	0.0743	0.0847	0.13	0.125
	-84.3564	0.0865	0.0565	0.0779	0.082	0.136	0.141
	-84.3594	0.0661	0.0678	0.0908	0.102	0.16	0.164
	-84.3624	0.075	0.0791	0.104	0.123	0.183	0.212
	-84.3654	0.0861	0.0853	0.122	0.132	0.207	0.274
	-84.3684	0.0796	0.0915	0.14	0.141	0.231	0.312
	-84.3714	0.0859	0.114	0.17	0.17	0.268	0.346
	-84.3744	0.11	0.137	0.2	0.199	0.306	0.406
	-84.3774	0.115	0.159	0.221	0.219	0.322	0.481
	-84.3804	0.12	0.182	0.22	0.239	0.339	0.597
	-84.3834	0.127	0.203	0.235	0.291	0.389	0.77
	-84.3864	0.152	0.224	0.298	0.365	0.464	0.944
	-84.3894	0.21	0.291	0.371	0.444	0.559	1
	-84.3924	0.297	0.405	0.478	0.589	0.653	0.898
	-84.3954	0.398	0.548	0.662	0.788	0.735	0.737
	-84.3984	0.552	0.711	0.826	0.864	0.745	0.616
	-84.4014	0.701	0.784	0.826	0.756	0.663	0.542
	-84.4044	0.702	0.7	0.694	0.597	0.556	0.467
	-84.4074	0.587	0.581	0.567	0.508	0.482	0.403
	-84.4104	0.489	0.51	0.474	0.44	0.432	0.339
	-84.4134	0.422	0.438	0.393	0.358	0.368	0.271
	-84.4164	0.337	0.347	0.312	0.277	0.304	0.229
	-84.4194	0.268	0.293	0.239	0.212	0.24	0.22
	-84.4224	0.229	0.259	0.188	0.183	0.199	0.187
	-84.4254	0.193	0.208	0.164	0.153	0.172	0.143
	-84.4284	0.156	0.157	0.14	0.123	0.169	0.123
	-84.4314	0.135	0.134	0.0974	0.0936	0.161	0.11
	-84.4344	0.114	0.111	0.0758	0.0866	0.129	0.0956
	-84.4374	0.101	0.105	0.0737	0.0781	0.105	0.0786
	-84.4404	0.0886	0.0997	0.0717	0.0697	0.082	0.0616
	-84.4434	0.0883	0.078	0.0668	0.06	0.075	0.0381
	-84.4464	0.0879	0.0562	0.0619	0.0503	0.068	0.0394
	-84.4494	0.0788	0.0514	0.0571	0.0602	0.0671	0.033
	-84.4524	0.0521	0.0467	0.0522	0.07	0.0662	0.0266
	-84.4554	0.0287	0.048	0.0454	0.0435	0.0614	0.0359
	-84.4584	0.0347	0.0493	0.0385	0.0388	0.0567	0.0452
	-84.4614	0.0428	0.0455	0.0491	0.0464	0.052	0.0421
	-84.4644	0.0334	0.0417	0.0596	0.0322	0.0473	0.0389
	-84.4674	0.0274	0.0344	0.04	0.0157	0.0458	0.0427
	-84.4704	0.0389	0.0271	0.0204	0.0211	0.0443	0.0466
	-84.4734	0.0537	0.03	0.0251	0.0296	0.0429	0.0442
	-84.4764	0.051	0.0329	0.0298	0.0381	0.0414	0.0418
	-84.4794	0.0379	0.0337	0.0233	0.0353	0.04	0.0394
	-84.4824	0.0249	0.0345	0.0168	0.0106	0.0385	0.037
	-84.4854	0.0195	0.0353	0.0155	-0.00542	0.031	0.0222
	-84.4884	0.0141	0.0361	0.0142	0.0149	0.0235	0.00739
	-84.4914	0.023	0.0362	0.0117	0.0227	0.0297	0.0105
	-84.4944	0.032	0.0363	0.0091	0.00867	0.0358	0.0135
	-84.4974	0.0322	0.0313	0.00652	0.0201	0.036	0.0104
	-84.5004	0.0324	0.0263	0.00395	0.0315	0.0361	0.0072
	-84.5034	0.0238	0.0135	0.00538	0.0259	0.024	0.00987
	-84.5064	0.0152	0.000756	0.00682	0.0203	0.0118	0.0125
	-84.5094	0.0202	0.0199	0.00826	0.0146	0.0186	0.0152
	-84.5124	0.0251	0.039	0.00969	0.00901	0.0254	0.0179
	-84.5154	0.0274	0.0181	0.0129	0.0125	0.022	0.0184
	-84.5184	0.012	0.0176	0.016	0.016	0.0307	0.019
	-84.5214	-0.00216	0.037	0.00876	0.00856	0.0478	0.0195
	-84.5244	0.0129	0.0225	0.00151	0.00114	0.0406	0.0201
	-84.5274	0.0277	0.00409	0.0114	0.00633	0.0205	0.0154
	-84.5304	0.0249	0.0197	0.0213	0.0115	0.0247	0.0108
	-84.5334	0.0152	0.0256	0.0138	0.00581	0.0238	0.00536
	-84.5364	0.023	0.011	0.00633	9.33e-05	0.0229	-6.36e-05
	-84.5394	0.0157	0.00928	0.00982	-0.00148	0.024	0.0115
	-84.5424	0.00834	0.00754	0.0133	-0.00305	0.0251	0.0106
	-84.5454	0.00648	-0.00696	-0.000568	0.000839	0.0261	0.00377
	-84.5484	0.00463	-0.00105	-0.0144	0.00472	0.0272	0.0177
	-84.5514	0.0116	0.00624	-0.00423	0.0094	0.0201	0.0186
	-84.5544	0.0187	0.0135	0.00598	0.0141	0.013	-0.00121
	-84.5574	0.011	0.0306	0.00578	0.0174	0.024	0.00568
	-84.5604	0.00341	0.0273	0.00557	0.0207	0.035	0.025
	-84.5634	0.00512	-0.0029	0.00855	0.0264	0.022	0.00638
	-84.5664	0.00683	0.000949	0.0115	0.0102	0.00902	-0.0123
	-84.5694	0.00854	0.0439	0.0119	0.00629	0.00989	-0.00109
	-84.5724	0.0103	0.0392	0.0123	0.00239	0.0229	0.0101
	-84.5754	0.0239	0.00686	0.0319	0.00679	0.0406	0.0193
	-84.5784	0.0375	0.00848	0.00998	0.0112	0.0342	0.0285
	-84.5814	0.0306	0.0194	-0.012	0.0156	0.0169	0.0295
	-84.5844	0.0237	-0.00359	0.00769	0.02	0.0238	0.00966
	-84.5874	0.0297	-0.0075	0.0101	0.0207	0.0445	0.00592
	-84.5904	0.0358	0.0226	0.0126	0.0215	0.0411	0.0146
	-84.5934	0.0272	0.0259	0.0176	0.00317	0.0242	0.00883
	-84.5964	0.0186	0.00883	0.0226	0.00665	0.0316	0.00302
	-84.5994	0.014	0.0045	0.0188	0.0105	0.0271	0.0121
	-84.6024	0.00933	0.000165	0.0149	-0.0075	0.0105	0.0212
	-84.6054	0.00907	-0.00417	0.0111	-0.000951	0.00547	0.00127
	-84.6084	0.00881	-0.0085	0.0072	0.0056	0.0126	-0.0187
	-84.6114	0.0132	-0.0126	0.0176	-0.000823	0.0206	-0.00322
	-84.6144	0.0177	0.0038	0.028	-0.00725	0.0286	0.0122
	-84.6174	0.0133	0.0214	0.021	-0.00277	0.0233	0.00692
	-84.6204	0.00897	0.0186	0.0141	0.00171	0.018	0.00162
	-84.6234	0.0164	0.00726	0.00822	0.0144	0.0232	0.00579
	-84.6264	0.0239	0.0163	0.00235	0.027	0.0285	0.00995
	-84.6294	0.0225	0.0177	0.00689	0.0215	0.0236	0.00789
	-84.6324	0.0212	0.019	0.0114	0.016	0.0188	0.00584
b		[BRAF]
	ppm	400 uM	160 uM	64 uM	25 uM	10 uM	4 uM				[BRAF] μM	Fraction dimer
	-83.7025	0.00299	0.00121	0.000606	-0.00158	0.00736	-0.00146				400	0.757005
	-83.7055	0.00201	0.00231	-0.00115	-0.00319	0.00852	-0.00122				160	0.645276
	-83.7085	0.00103	0.00342	-0.0029	-0.0048	0.00968	-0.000973				64	0.504214
	-83.7115	0.00465	0.00242	-0.00425	-0.00128	0.00997	0.00146				25.6	0.348388
	-83.7145	0.00826	0.00143	-0.0056	0.00223	0.0103	0.00388				10.24	0.2066
	-83.7175	0.00478	0.0027	-0.00465	0.00245	0.0118	0.0023				4.096	0.10513
	-83.7205	0.0013	0.00396	0.000887	0.00267	0.0133	-0.00171
	-83.7234	0.000189	0.00307	0.00457	0.000408	0.0121	-0.00526
	-83.7264	-0.000917	0.00218	0.000606	-0.00185	0.0109	-0.00394
	-83.7294	0.00266	0.00354	-0.0047	-0.00081	0.0114	-0.00155
	-83.7324	0.00624	0.00491	-0.00235	0.000232	0.00939	-0.00159
	-83.7354	0.00659	0.00336	0.00279	0.000272	0.00688	-0.00159
	-83.7384	0.000864	0.0018	0.000283	0.000311	0.00926	0.000851
	-83.7414	-0.00334	0.00251	-0.00232	0.00253	0.013	0.000703
	-83.7444	-0.00147	0.00322	-0.000333	-0.000906	0.0119	-0.00188
	-83.7474	0.00088	0.00497	-0.00162	-0.00326	0.00993	0.00129
	-83.7504	0.00323	0.00672	-0.00292	0.000984	0.0129	0.00446
	-83.7534	0.00825	0.00469	-0.00162	0.00258	0.0115	0.0018
	-83.7564	0.00718	0.00266	-0.000333	-0.000545	0.0102	-0.000865
	-83.7594	0.00305	0.0046	0.00192	-0.00169	0.011	0.00104
	-83.7624	0.00499	0.00653	0.00416	-1.1e-05	0.0118	0.00294
	-83.7654	0.00807	0.00318	0.00259	-0.000392	0.0126	0.000734
	-83.7684	0.00508	-0.000163	0.00101	-0.000774	0.0134	0.000962
	-83.7714	0.0053	0.00309	-0.000489	0.00312	0.0125	0.00308
	-83.7744	0.00551	0.00635	-0.00198	0.00418	0.0115	0.000328
	-83.7774	0.00535	0.00715	0.000349	0.00354	0.0118	-0.00243
	-83.7804	0.00519	0.00343	0.00268	0.00289	0.012	-0.000307
	-83.7834	0.00436	0.00272	0.00157	-5.7e-05	0.0113	0.00262
	-83.7864	0.00354	0.00654	0.000456	-0.003	0.0105	0.00312
	-83.7894	0.00271	0.00782	0.00164	-0.00159	0.00852	0.00285
	-83.7924	0.00188	0.00457	0.00282	0.00266	0.00654	0.00259
	-83.7954	0.00254	0.00662	0.00127	0.00337	0.00888	0.00307
	-83.7984	0.00319	0.00867	-0.000291	0.00125	0.0112	0.00356
	-83.8014	0.00385	0.00515	0.00198	0.000897	0.0103	0.00162
	-83.8044	0.00451	0.00164	0.00425	0.000545	0.0143	-0.000332
	-83.8074	0.00241	0.00281	0.00393	-0.00155	0.0147	0.00208
	-83.8104	0.000314	0.00399	0.00362	-0.00364	0.00706	0.0045
	-83.8134	0.00328	0.0063	0.00445	-0.00243	0.006	0.00286
	-83.8164	0.00625	0.00861	0.00529	-0.00122	0.00981	0.00122
	-83.8194	0.00525	0.0054	0.00317	0.00023	0.0101	-0.000789
	-83.8224	0.00426	0.00218	0.00105	0.00168	0.0103	-0.00279
	-83.8254	0.000979	0.00576	7.66e-05	0.00153	0.0136	-0.00241
	-83.8284	0.00378	0.00934	-0.000895	0.00139	0.012	0.000404
	-83.8314	0.00861	0.00773	-0.000791	0.00268	0.0114	0.00215
	-83.8344	0.00736	0.00611	-0.000686	0.00115	0.0107	-0.000966
	-83.8374	0.00687	0.00563	0.00172	0.00169	0.0118	-0.00201
	-83.8404	0.00638	0.00516	0.00412	0.00505	0.0129	0.00182
	-83.8434	0.00521	0.00648	0.00305	0.00622	0.0123	0.00767
	-83.8464	0.00403	0.00779	0.00199	0.00267	0.0117	0.0054
	-83.8494	0.00818	0.00534	0.00207	0.000358	0.00958	0.00106
	-83.8524	0.00625	0.00289	0.00215	0.000877	0.0123	0.00158
	-83.8554	0.00296	0.0047	0.000588	0.00266	0.0117	0.00289
	-83.8584	0.00574	0.00651	-0.000979	0.00445	0.0111	0.00176
	-83.8614	0.00815	0.00607	-0.000249	0.00488	0.0108	0.00109
	-83.8644	0.00448	0.00562	0.00048	0.00248	0.0105	0.000416
	-83.8674	0.00782	0.00572	0.000169	0.000269	0.0107	0.00133
	-83.8704	0.0112	0.00583	-0.000142	0.000884	0.0109	0.00225
	-83.8734	0.00908	0.00367	0.00184	0.00386	0.00987	0.00377
	-83.8764	0.00698	0.00151	0.00383	0.004	0.00886	0.000423
	-83.8794	0.00672	0.0034	0.00268	-0.000984	0.0102	-0.00186
	-83.8824	0.00646	0.0053	0.00153	-0.00314	0.0115	0.00073
	-83.8854	0.00467	0.00342	-0.00062	0.00272	0.0115	0.00134
	-83.8884	0.00289	0.00155	-0.00277	0.00576	0.0116	0.00195
	-83.8914	0.00436	0.00312	-0.00204	0.00157	0.0124	0.00187
	-83.8944	0.00583	0.00469	0.000989	0.000206	0.0131	-0.000646
	-83.8974	0.00578	0.00399	0.00316	0.00215	0.0126	-0.0024
	-83.9004	0.00573	0.0033	0.000731	0.00126	0.0122	0.000714
	-83.9034	0.00596	0.0052	-0.00114	0.000608	0.0119	0.00254
	-83.9064	0.00619	0.0071	-0.000722	0.00279	0.0116	-0.000513
	-83.9094	0.00377	0.0039	0.00013	-0.000107	0.00932	-0.00189
	-83.9124	0.00134	0.00524	0.000983	-0.003	0.00702	-0.000827
	-83.9154	-0.000561	0.00732	0.00406	-0.00152	0.0098	-0.00033
	-83.9184	0.00361	0.00486	0.00254	-4.41e-05	0.0126	0.000166
	-83.9214	0.00589	0.0027	-0.0028	1.85e-05	0.0133	0.000814
	-83.9244	0.00817	0.00506	-0.00355	8.12e-05	0.0141	0.00146
	-83.9274	0.00835	0.00536	-0.000474	0.00091	0.0127	0.000564
	-83.9304	0.00854	0.00567	0.0026	0.00174	0.0113	-0.000335
	-83.9334	0.00758	0.0104	0.00367	0.00115	0.0119	-1.65e-05
	-83.9364	0.00663	0.0106	0.00474	-0.00226	0.0126	0.000302
	-83.9394	0.00353	0.00173	0.00265	-0.00489	0.0111	0.00303
	-83.9424	0.00651	0.000377	0.00057	-0.00281	0.00954	0.00575
	-83.9454	0.00607	0.00535	0.00231	0.000398	0.0116	0.00442
	-83.9484	0.00563	0.00579	0.00406	0.000774	0.00223	0.00308
	-83.9514	0.00801	0.00554	0.0024	0.0015	0.000229	0.00248
	-83.9544	0.0104	0.0053	0.000749	0.00223	-0.00177	0.00188
	-83.9574	0.0077	0.00308	0.000675	0.00137	-0.00276	6.44e-05
	-83.9604	0.00502	0.00538	-0.0017	0.000509	0.00113	-0.00175
	-83.9634	0.00825	0.00884	-0.00311	0.000265	0.000122	-0.000373
	-83.9664	0.0115	0.00777	6.76e-05	2.22e-05	-0.000889	0.00101
	-83.9694	0.00965	0.00557	0.00195	-0.00164	-0.00129	0.00117
	-83.9724	0.00782	0.0079	0.00154	-0.00329	-0.00169	0.00133
	-83.9754	0.0102	0.00848	0.000705	-0.000973	-0.00336	-0.00143
	-83.9784	0.0126	0.00453	0.00216	0.00135	-0.000157	-0.00418
	-83.9814	0.012	0.00568	0.00448	0.00308	0.00305	-0.0012
	-83.9844	0.0114	0.00683	0.0068	0.00198	0.00138	-0.000662
	-83.9874	0.0107	0.00996	0.00582	-3.67e-05	0.000942	-0.00251
	-83.9904	0.00995	0.0131	0.00485	0.000774	0.000506	0.000508
	-83.9934	0.00923	0.0109	0.0023	0.00158	0.000984	0.000941
	-83.9964	0.00851	0.00878	0.00205	-0.000435	0.00146	-0.00106
	-83.9994	0.01	0.0083	0.00409	-0.000862	0.00131	-0.00114
	-84.0024	0.0116	0.00782	0.00154	0.00154	0.00115	0.00123
	-84.0054	0.0116	0.00819	-0.00116	0.002	-2.47e-05	0.0013
	-84.0084	0.0116	0.00856	0.000743	0.00245	0.00368	-0.00106
	-84.0114	0.0137	0.0086	0.00236	0.00366	0.00421	-0.00242
	-84.0144	0.0159	0.00412	-0.000626	0.00204	-0.000139	0.00108
	-84.0174	0.015	0.00189	-0.00203	-0.00117	-0.00317	0.00595
	-84.0204	0.0141	0.00419	-0.00113	-0.00155	-0.0062	0.00595
	-84.0234	0.0156	0.00501	0.00175	0.000892	-0.00463	0.00126
	-84.0264	0.0172	0.00583	0.00462	0.000509	0.00183	0.00144
	-84.0294	0.0157	0.00891	0.00382	-0.00206	0.00543	0.00537
	-84.0324	0.0142	0.012	0.00302	-0.00179	0.00416	0.00444
	-84.0354	0.0156	0.0129	0.00332	-0.00156	0.00344	0.00183
	-84.0384	0.017	0.00919	0.00362	-0.00134	0.00273	-0.000773
	-84.0414	0.0166	0.00712	0.00478	-0.000937	-0.00134	0.000377
	-84.0444	0.0161	0.0126	0.00595	-0.000534	-0.000534	0.00153
	-84.0474	0.0206	0.0153	0.00536	0.000517	0.000962	0.000443
	-84.0504	0.019	0.0105	0.000187	0.00157	-0.00242	-0.00064
	-84.0534	0.0156	0.0082	8.26e-05	0.0012	-0.00347	0.000713
	-84.0564	0.0182	0.0134	0.00457	0.00084	0.000368	0.00207
	-84.0594	0.024	0.0171	0.00456	0.00156	0.000568	0.00259
	-84.0624	0.0237	0.0163	-4e-05	0.00228	0.000768	0.00312
	-84.0654	0.0187	0.015	0.000621	0.003	-0.00076	-0.00041
	-84.0684	0.0198	0.0138	0.00358	0.00372	-0.00229	-0.00394
	-84.0714	0.023	0.0109	0.00378	0.00161	-0.00155	0.00115
	-84.0744	0.0262	0.0125	0.00169	-0.000503	-0.00082	0.00625
	-84.0774	0.0247	0.0139	0.0019	0.00163	-0.00293	0.00566
	-84.0804	0.0233	0.0153	0.0044	0.00377	-0.00505	0.00507
	-84.0834	0.0202	0.013	0.00534	0.00398	-0.00403	0.00158
	-84.0864	0.0172	0.0107	0.00398	0.0042	-0.00301	-0.00191
	-84.0894	0.0193	0.0121	0.00291	0.00618	-0.002	0.000275
	-84.0924	0.0214	0.0136	0.00184	0.00533	-0.000979	0.00247
	-84.0954	0.0234	0.0132	0.00342	0.00219	-0.00296	0.00293
	-84.0984	0.0255	0.0128	0.005	0.00187	-0.00494	0.00339
	-84.1014	0.0245	0.0144	0.0041	0.00309	-0.0055	0.00284
	-84.1044	0.0235	0.016	-0.0014	0.0043	-0.00118	-0.00258
	-84.1074	0.0274	0.0178	-0.00107	0.00295	0.00119	-0.00296
	-84.1104	0.0312	0.0152	0.00385	0.00159	-0.00131	0.00152
	-84.1134	0.03	0.0134	0.00619	0.000239	-0.00381	0.0019
	-84.1164	0.0288	0.0161	0.00393	-0.00112	-0.00144	-0.000161
	-84.1194	0.0295	0.0195	0.00404	0.000241	0.00196	0.00194
	-84.1224	0.0302	0.0184	0.00416	0.0016	0.00047	0.00404
	-84.1254	0.0308	0.0175	0.00226	0.00219	0.000813	0.00355
	-84.1284	0.0315	0.0212	0.00495	-5.15e-05	0.00116	0.00307
	-84.1314	0.0324	0.0224	0.0088	-0.000324	-0.00147	0.00313
	-84.1344	0.0332	0.0235	0.00806	-0.000597	-0.0041	0.00319
	-84.1374	0.0341	0.0227	0.00789	0.00143	-0.00133	0.00326
	-84.1404	0.0349	0.0219	0.00772	0.00346	0.00143	0.00332
	-84.1434	0.0371	0.0225	0.00519	0.00619	0.00218	0.00359
	-84.1464	0.0392	0.0231	0.00265	0.00326	-0.00194	0.00385
	-84.1494	0.0413	0.0237	0.007	-0.00249	-0.00332	0.00412
	-84.1524	0.0434	0.0243	0.0114	-0.00259	-0.0047	0.00439
	-84.1554	0.0466	0.0239	0.00718	-0.000413	-0.00594	0.00153
	-84.1584	0.0497	0.0236	0.003	0.00176	-0.00718	-0.00132
	-84.1614	0.0528	0.0226	0.00571	0.00287	-0.00304	0.00151
	-84.1644	0.056	0.0262	0.00843	0.00399	0.00111	0.00434
	-84.1674	0.056	0.0324	0.00751	0.00215	0.00124	0.00224
	-84.1704	0.0561	0.034	0.00658	0.000317	-0.00351	0.00015
	-84.1734	0.0592	0.0317	0.00796	-0.000103	-0.00419	0.000493
	-84.1764	0.0623	0.0293	0.00933	-0.000523	1.23e-05	0.000835
	-84.1794	0.0662	0.0312	0.0117	-0.00108	0.000811	-0.000605
	-84.1824	0.0701	0.0331	0.0142	-0.00164	0.00161	-0.00204
	-84.1854	0.0725	0.0324	0.0127	0.00252	0.000274	0.000575
	-84.1884	0.0748	0.0363	0.0113	0.00668	-0.00106	0.00319
	-84.1914	0.077	0.0393	0.0114	0.00415	0.000652	0.00137
	-84.1944	0.0791	0.0423	0.0115	0.00162	0.00237	-0.000446
	-84.1974	0.0813	0.0418	0.0128	0.00381	1.38e-05	0.000169
	-84.2004	0.0834	0.0414	0.014	0.00599	-0.00234	0.000784
	-84.2034	0.087	0.0433	0.0124	0.00448	-0.00253	-0.000579
	-84.2064	0.0906	0.0452	0.0108	0.00296	-0.00272	-0.00194
	-84.2094	0.0942	0.0471	0.0162	0.00428	-0.000475	0.000956
	-84.2124	0.0978	0.049	0.0215	0.00559	0.00177	-0.00102
	-84.2154	0.102	0.0496	0.021	0.00641	0.00097	-0.000782
	-84.2184	0.105	0.0503	0.0206	0.00722	0.000168	0.00432
	-84.2214	0.112	0.0533	0.0201	0.00662	-0.000329	0.00233
	-84.2244	0.119	0.0562	0.0197	0.00602	-0.000827	0.000328
	-84.2274	0.124	0.0589	0.0194	0.00553	-0.00313	0.0018
	-84.2304	0.129	0.0615	0.0191	0.00503	-0.000557	0.00328
	-84.2334	0.135	0.0644	0.0183	0.00453	0.00202	0.00232
	-84.2364	0.142	0.0674	0.0221	0.00404	-0.000286	0.00136
	-84.2394	0.149	0.0667	0.0237	0.00708	0.0013	-0.00163
	-84.2424	0.156	0.0705	0.0208	0.0101	0.00288	-0.00462
	-84.2454	0.161	0.0746	0.0205	0.0103	0.00142	-0.000302
	-84.2484	0.166	0.0742	0.0247	0.0105	-5.13e-05	0.00402
	-84.2514	0.173	0.0745	0.0266	0.00939	0.00214	0.000906
	-84.2544	0.18	0.0794	0.0285	0.00823	-0.000557	-0.0022
	-84.2574	0.187	0.0814	0.0296	0.00583	0.000716	0.000369
	-84.2604	0.194	0.0834	0.0307	0.00343	0.00199	0.00294
	-84.2634	0.205	0.0868	0.0274	0.00404	-0.000475	0.00341
	-84.2664	0.217	0.0902	0.0242	0.00748	-0.00294	0.00388
	-84.2694	0.225	0.0959	0.0268	0.0113	-0.00134	0.00282
	-84.2724	0.24	0.102	0.034	0.00941	0.000266	0.00177
	-84.2754	0.258	0.106	0.0332	0.00858	5.04e-05	0.00164
	-84.2784	0.275	0.11	0.0323	0.0106	-0.000166	-0.00335
	-84.2814	0.296	0.12	0.0371	0.0106	-0.000382	-0.00428
	-84.2844	0.316	0.13	0.0419	0.0107	-0.000598	-0.000346
	-84.2874	0.347	0.134	0.0442	0.0136	0.00249	0.000648
	-84.2904	0.385	0.144	0.0465	0.0164	0.00558	0.00164
	-84.2934	0.424	0.162	0.05	0.0164	0.00297	0.00172
	-84.2964	0.469	0.18	0.0534	0.0165	0.000368	0.0018
	-84.2994	0.526	0.198	0.0588	0.0163	0.00191	-0.000559
	-84.3024	0.593	0.216	0.0642	0.0161	0.00346	-0.00292
	-84.3054	0.666	0.239	0.0721	0.0192	0.00256	9.65e-05
	-84.3084	0.749	0.266	0.0846	0.0279	0.00166	0.00311
	-84.3114	0.839	0.297	0.0989	0.0314	0.00301	0.00476
	-84.3144	0.922	0.327	0.109	0.0321	0.00435	0.00154
	-84.3174	0.982	0.352	0.116	0.0333	0.00416	0.00227
	-84.3204	1	0.361	0.123	0.0346	0.00398	0.003
	-84.3234	0.973	0.351	0.124	0.0347	0.00769	0.00335
	-84.3264	0.919	0.331	0.121	0.0348	0.00653	0.00369
	-84.3294	0.854	0.309	0.112	0.0318	0.00383	0.00464
	-84.3324	0.783	0.286	0.099	0.0287	0.00602	0.000721
	-84.3354	0.712	0.263	0.088	0.0297	0.0075	-0.00244
	-84.3384	0.647	0.235	0.0846	0.025	0.0041	-0.000725
	-84.3414	0.584	0.209	0.0792	0.0203	0.00344	-0.000839
	-84.3444	0.527	0.19	0.0692	0.0213	0.00278	-0.000954
	-84.3474	0.479	0.172	0.0646	0.019	0.00426	0.00015
	-84.3504	0.436	0.154	0.0601	0.0167	0.000857	0.00125
	-84.3534	0.402	0.139	0.053	0.0179	-0.00285	0.00236
	-84.3564	0.368	0.129	0.0458	0.0192	-0.00168	0.00346
	-84.3594	0.337	0.122	0.0425	0.0159	0.00148	0.00193
	-84.3624	0.312	0.116	0.0392	0.0184	-0.000248	0.000391
	-84.3654	0.292	0.106	0.0381	0.0235	-0.00197	0.00129
	-84.3684	0.272	0.0954	0.0371	0.0192	0.00118	0.00219
	-84.3714	0.258	0.0926	0.0351	0.0119	0.00523	0.00166
	-84.3744	0.244	0.0898	0.0332	0.014	0.00439	0.00113
	-84.3774	0.23	0.0848	0.0336	0.0147	0.00285	0.00455
	-84.3804	0.216	0.0797	0.034	0.0125	0.0013	0.00311
	-84.3834	0.202	0.0764	0.0289	0.0114	0.000722	-0.000472
	-84.3864	0.187	0.0731	0.0239	0.0102	0.00502	-0.00405
	-84.3894	0.174	0.0675	0.0213	0.0104	0.00556	0.000695
	-84.3924	0.171	0.0619	0.0233	0.0105	0.00122	0.00544
	-84.3954	0.17	0.0599	0.0245	0.00834	-0.00449	0.0062
	-84.3984	0.163	0.0579	0.0211	0.00619	-0.00533	0.00209
	-84.4014	0.158	0.0562	0.0229	0.0074	-0.00352	0.00194
	-84.4044	0.152	0.0544	0.0247	0.00578	-0.00171	0.00179
	-84.4074	0.149	0.0541	0.0229	0.00383	-0.000612	0.00163
	-84.4104	0.146	0.0584	0.021	0.00755	0.000486	0.00148
	-84.4134	0.147	0.0578	0.023	0.0125	0.000363	0.000112
	-84.4164	0.154	0.0572	0.025	0.0118	0.000241	-0.00126
	-84.4194	0.161	0.0651	0.0297	0.0093	0.00113	-0.00194
	-84.4224	0.169	0.0731	0.0345	0.0068	0.00202	-0.00261
	-84.4254	0.183	0.0815	0.0357	0.00908	0.00169	-0.000654
	-84.4284	0.203	0.0899	0.0369	0.017	0.00137	0.00618
	-84.4314	0.232	0.104	0.045	0.0237	0.00447	0.0106
	-84.4344	0.272	0.126	0.0578	0.0276	0.00757	0.0102
	-84.4374	0.329	0.159	0.0706	0.035	0.00915	0.00884
	-84.4404	0.408	0.203	0.091	0.0481	0.0156	0.00742
	-84.4434	0.507	0.261	0.127	0.0646	0.0292	0.0122
	-84.4464	0.589	0.315	0.164	0.0811	0.0428	0.0169
	-84.4494	0.59	0.319	0.177	0.0839	0.0445	0.0187
	-84.4524	0.524	0.273	0.159	0.0734	0.0381	0.0157
	-84.4554	0.452	0.23	0.129	0.0632	0.0298	0.0133
	-84.4584	0.395	0.207	0.113	0.0558	0.0265	0.011
	-84.4614	0.337	0.177	0.103	0.0468	0.0254	0.0107
	-84.4644	0.279	0.14	0.0861	0.0407	0.0194	0.0105
	-84.4674	0.238	0.114	0.0711	0.0381	0.012	0.00789
	-84.4704	0.204	0.095	0.0607	0.0299	0.00952	0.00527
	-84.4734	0.173	0.0786	0.0483	0.0219	0.00968	0.0067
	-84.4764	0.153	0.0668	0.036	0.0195	0.00983	0.00814
	-84.4794	0.135	0.0573	0.0303	0.0187	0.00724	0.00526
	-84.4824	0.117	0.0479	0.0245	0.0179	0.00465	0.00238
	-84.4854	0.111	0.043	0.0213	0.0166	0.00328	0.00518
	-84.4884	0.104	0.0381	0.0227	0.0124	0.00191	0.00799
	-84.4914	0.0924	0.0294	0.022	0.00812	0.00198	0.00706
	-84.4944	0.0865	0.0283	0.0166	0.00945	0.00205	0.00614
	-84.4974	0.0802	0.0344	0.0145	0.0092	0.00334	0.00521
	-84.5004	0.0738	0.033	0.0123	0.00611	0.00463	0.00428
	-84.5034	0.0702	0.0236	0.0123	0.00485	0.00282	0.00303
	-84.5064	0.0665	0.0218	0.0169	0.00642	0.00101	0.00177
	-84.5094	0.0629	0.0246	0.0169	0.00622	-0.00354	0.00295
	-84.5124	0.0592	0.0229	0.00914	0.00602	-0.00322	0.00413
	-84.5154	0.0572	0.0217	0.00545	0.00637	-0.00148	0.00266
	-84.5184	0.0553	0.0204	0.00941	0.00671	0.000263	0.0012
	-84.5214	0.0535	0.0166	0.00859	0.00706	-0.000132	0.00399
	-84.5244	0.0518	0.0128	0.00776	0.00741	-0.000528	0.00191
	-84.5274	0.05	0.0124	0.00921	0.00787	-0.00214	-0.0012
	-84.5304	0.0513	0.0119	0.0107	0.00833	-0.00376	0.00055
	-84.5334	0.0499	0.0115	0.011	0.00579	-0.00161	0.00443
	-84.5364	0.0423	0.0111	0.0113	0.00325	0.000533	0.00345
	-84.5394	0.0383	0.0119	0.00871	0.00261	0.00271	0.00149
	-84.5424	0.0443	0.0127	0.00616	-0.000862	9.07e-06	-0.000478
	-84.5454	0.0477	0.0135	0.00743	-0.00327	-0.003	-0.00031
	-84.5484	0.0451	0.0143	0.0087	-2.2e-05	-0.00113	-0.000142
	-84.5514	0.0415	0.0156	0.00734	0.00332	0.00207	-0.000177
	-84.5544	0.0379	0.0169	0.00598	0.00382	0.000384	-0.000212
	-84.5574	0.0336	0.0129	0.00576	0.00363	-0.0013	-0.000246
	-84.5604	0.0354	0.00891	0.00555	0.00343	0.00189	-0.000281
	-84.5634	0.0349	0.0103	0.00286	0.00244	0.00574	-0.00064
	-84.5664	0.0344	0.0117	0.000172	0.00428	0.0047	-0.000998
	-84.5694	0.0343	0.0128	0.00131	0.00665	0.00102	-0.00136
	-84.5724	0.0342	0.0139	0.00245	0.00337	-0.00266	-0.00171
	-84.5754	0.0336	0.0143	0.00454	-0.00195	-0.00395	-0.00207
	-84.5784	0.033	0.0103	0.00664	-0.00161	-0.00525	-0.00243
	-84.5814	0.0324	0.00879	0.00519	-9.57e-05	-0.0041	-0.00279
	-84.5844	0.0318	0.00729	0.00375	0.00142	-0.00295	-0.00315
	-84.5874	0.0305	0.00824	0.00272	0.00277	-0.00172	-0.00311
	-84.5904	0.0291	0.0092	0.00628	0.00412	-0.000499	-0.00308
	-84.5934	0.0293	0.0102	0.00612	0.00264	-0.00171	-0.00304
	-84.5964	0.0294	0.0111	0.00595	0.00116	-0.00293	-0.00301
	-84.5994	0.0278	0.00715	0.00615	0.00262	-0.000688	-0.00186
	-84.6024	0.0261	0.0032	0.00634	0.00409	0.00155	-0.000706
	-84.6054	0.0296	0.00199	0.00653	0.00255	-0.0019	0.00258
	-84.6084	0.03	0.0053	0.00672	0.00101	-0.00535	0.00586
	-84.6114	0.0245	0.00777	0.00339	0.00156	-0.00454	0.00485
	-84.6144	0.025	0.0103	4.67e-05	-0.000716	-0.00372	-0.00103
	-84.6174	0.031	0.0107	0.000536	-0.00211	-0.000468	-0.00285
	-84.6204	0.0269	0.0112	0.00102	0.00216	0.00279	0.000207
	-84.6234	0.0235	0.00886	0.00281	0.00165	0.00167	-0.000115
	-84.6264	0.0262	0.00648	0.00459	-0.00452	0.000551	-0.000437
	-84.6294	0.0266	0.00636	0.00512	-0.00403	0.00187	0.000764
	-84.6324	0.0239	0.00624	0.00107	-0.000704	0.0032	0.00196
	-84.6354	0.0246	0.00664	0.00167	-4.09e-05	0.00133	0.00235
	-84.6384	0.0253	0.00703	0.00228	0.000622	-0.000539	0.00274
	-84.6414	0.0227	0.0046	0.000308	0.00146	3.37e-05	0.000694
	-84.6444	0.0202	0.00669	-0.00167	0.0023	0.000606	-0.00135
	-84.6474	0.0207	0.00878	0.00191	0.000783	-0.000193	0.000684
	-84.6504	0.0212	0.00635	0.00548	-0.000736	-0.000993	0.00272
	-84.6534	0.0186	0.00419	0.000829	0.00246	-0.00179	0.0007
	-84.6564	0.0161	0.00657	0.000767	0.00566	-0.00259	-0.00132
	-84.6594	0.0177	0.00516	0.00465	0.00466	-0.000743	0.000443
	-84.6624	0.0192	0.00375	0.00394	0.00365	0.00111	0.00221
	-84.6654	0.0206	0.00488	0.000929	0.0046	0.000517	0.00265
	-84.6684	0.022	0.00602	0.00251	0.00271	-7.35e-05	-0.00177
	-84.6714	0.023	0.00659	0.00398	-0.00251	-0.000587	-0.00325
	-84.6744	0.0209	0.00715	0.000851	-0.00207	-0.0011	-0.00474
	-84.6774	0.0168	0.00801	-0.00113	-3.26e-05	-0.000395	-0.00246
	-84.6804	0.0187	0.00433	0.00148	-0.00366	0.000311	-0.000192
	-84.6834	0.0234	0.00492	0.00357	-0.00364	-0.00047	0.0012
	-84.6864	0.022	0.0055	0.00107	0.00203	-0.00125	0.0026
	-84.6894	0.0223	0.00552	0.000857	0.00134	-0.00203	0.00156
	-84.6924	0.0256	0.00554	0.00524	0.000643	-0.00281	0.000524
	-84.6954	0.025	0.00811	0.00592	-0.000227	-0.00174	0.000957
	-84.6984	0.0183	0.00615	0.002	-0.0011	-0.000663	0.00139
	-84.7014	0.0166	0.00391	0.000379	0.000863	0.000412	0.00182
	-84.7044	0.0179	0.00619	0.00335	0.00282	0.00149	0.00226
	-84.7074	0.0143	0.00887	0.00464	0.00178	-0.00153	0.00335
	-84.7104	0.0106	0.00702	0.00134	0.000744	-0.00454	0.00444
	-84.7134	0.0163	0.00601	0.0032	0.00307	-0.00187	0.00309
	-84.7164	0.0219	0.00501	0.00506	0.00256	0.000813	0.00175
	-84.7194	0.0195	0.0025	0.00252	-0.000899	0.000975	0.00188
	-84.7224	0.0171	0.00451	-1.61e-05	0.0013	0.00114	0.002
	-84.7254	0.0215	0.00681	-0.000258	0.00227	-0.000836	-0.000307
	-84.7284	0.0198	0.00458	-0.000501	-0.00242	-0.00281	-0.00262
	-84.7314	0.0145	0.00467	0.00298	-0.00388	-0.00453	-0.00011
	-84.7344	0.0153	0.00929	0.00645	0.000332	-0.00138	0.0024
	-84.7374	0.0172	0.0118	0.00716	0.001	0.000861	0.000841
	-84.7404	0.0161	0.00684	0.00327	0.00167	-0.00178	-0.000713
	-84.7434	0.0137	0.00471	0.00471	0.00361	-0.00284	-0.00196
	-84.7464	0.0144	0.00712	0.00616	0.00555	0.000972	-0.00321
	-84.7494	0.0162	0.00707	-0.000916	0.00277	0.000212	-0.00203
	-84.7524	0.018	0.00249	-0.0034	-7.27e-06	-0.000547	-0.000839
	-84.7554	0.0158	0.00225	0.00022	-0.000177	0.00266	0.0012
	-84.7584	0.0136	0.00653	-0.000758	-0.000346	0.000985	0.00325
	-84.7614	0.0165	0.00827	-0.0026	-0.000516	-0.00201	0.00285
	-84.7644	0.0194	0.00548	0.000157	-0.000685	-0.00501	0.00246
	-84.7674	0.016	0.00505	0.0015	-0.000118	-0.0063	0.00176
	-84.7704	0.0125	0.00462	0.00284	0.00045	-0.00759	0.00106
	-84.7734	0.0141	0.00617	0.00218	0.00243	-0.00482	-0.000243
	-84.7764	0.0157	0.00771	0.00151	0.00441	-0.00205	0.00332
	-84.7794	0.0163	0.00531	0.00326	0.00255	-0.0012	0.00594
	-84.7824	0.0168	0.0029	0.00501	0.000685	-0.00035	0.00369
	-84.7854	0.0157	0.00427	0.00446	0.00165	-0.00194	0.00205
	-84.7884	0.0145	0.00563	0.00391	0.00262	-0.00353	0.000404
	-84.7914	0.016	0.00474	0.00384	0.00172	-0.00355	0.000994
	-84.7944	0.0144	0.00384	0.00378	0.000833	-0.00357	0.00158
	-84.7974	0.0107	0.00294	0.0017	0.00136	-0.00439	-0.00189
	-84.8004	0.0131	0.00204	-0.000381	0.00188	-0.000344	-0.00536
	-84.8034	0.0153	0.00244	-0.00315	0.000623	0.00317	-0.00189
	-84.8064	0.0115	0.00283	-0.00132	-0.000633	-0.00145	0.00157
	-84.8094	0.0093	0.00322	0.000225	0.00147	-0.00607	0.000979
	-84.8124	0.0132	0.00362	0.00177	0.000746	-0.00255	0.000385
	-84.8154	0.0132	0.00434	0.00525	-0.00051	0.00076	0.000374
	-84.8184	0.0101	0.00506	0.00872	0.00389	-0.000809	0.000362
	-84.8214	0.0123	0.00352	0.00684	0.00358	-0.00156	0.00157
	-84.8244	0.0146	0.00198	0.00497	-0.00239	-0.00232	0.00278
	-84.8274	0.00954	0.00199	0.00461	-0.000655	-0.00211	0.000253
	-84.8304	0.00754	0.002	0.00424	0.00391	-0.0019	-0.00227
	-84.8334	0.0127	0.00201	0.00503	0.00176	-0.00199	-0.000733
	-84.8364	0.0118	0.00202	0.00582	0.00243	-0.00209	0.000803
	-84.8394	0.0103	0.00378	0.00391	0.00652	-4.73e-05	-0.000705
	-84.8424	0.015	0.00554	0.00199	0.00496	-0.00289	-0.00221
	-84.8454	0.0125	0.00503	0.00237	0.00216	-0.00573	-0.00129
	-84.8484	0.00692	0.00452	0.00275	0.00501	-0.00369	-0.000357
	-84.8514	0.0109	0.00601	0.00208	0.004	-0.00215	0.000443
	-84.8544	0.0148	0.0075	0.0014	0.00299	-0.000622	0.00124
	-84.8574	0.0114	0.00371	0.00302	0.00468	-0.00092	0.000827
	-84.8604	0.011	-8.61e-05	0.00464	0.000724	-0.00122	0.00041
	-84.8634	0.0122	0.00192	0.00465	-0.0063	-0.00172	-0.000108
	-84.8664	0.00735	0.00393	0.00467	-0.0039	0.00266	-0.000627
	-84.8694	0.0055	0.00368	-0.000194	-0.00102	0.0156	-0.00115
	-84.8724	0.00972	0.00342	-0.000465	-0.000969	0.0106	-0.00166
	-84.8754	0.0121	0.00339	0.000341	0.000863	0.0117	-0.000806
	-84.8784	0.0115	0.00336	0.00115	-0.000135	0.0129	5.17e-05
	-84.8814	0.0115	0.00333	0.00339	-0.00349	0.0116	0.00213
	-84.8844	0.0114	0.0033	0.00563	-0.00119	0.0104	0.0042
	-84.8874	0.0108	0.00327	0.00316	0.00451	0.0118	0.000317
	-84.8904	0.0102	0.00324	0.000687	0.000766	0.0132	-0.00357
	-84.8934	0.0111	0.00321	0.000512	-0.00315	0.0108	-0.00015
	-84.8964	0.012	0.00317	0.000337	-0.00141	0.00843	0.00327
	-84.8994	0.0105	0.00311	0.00139	-0.00232	0.00554	0.000789
	-84.9024	0.00907	0.00305	0.00244	-0.000409	0.00753	-0.00169
	-84.9054	0.0107	0.00497	0.0012	0.00239	0.012	-0.000115
	-84.9084	0.0123	0.00689	-4e-05	-0.000472	0.0115	0.00146
	-84.9114	0.00993	0.00791	0.000727	-0.0028	0.0113	0.00126
	-84.9144	0.0076	0.0044	0.00149	0.000527	0.0111	0.00107
	-84.9174	0.00679	0.000613	0.00226	0.00173	0.0106	0.000868
	-84.9204	0.00598	0.00135	0.00303	0.000111	0.0101	0.00067
	-84.9234	0.00821	0.00496	0.00281	0.00241	0.0112	0.00176
	-84.9264	0.0104	0.00403	0.0026	0.00188	0.0123	0.00285
	-84.9294	0.00963	0.00566	0.00239	-0.000249	0.0109	-0.000121
	-84.9324	0.00882	0.00728	0.00217	0.000457	0.00958	-0.00309
	-84.9354	0.00836	0.00504	0.00253	0.000278	0.0105	-0.000835
	-84.9384	0.0079	-0.00174	0.00289	9.96e-05	0.0114	0.00142
	-84.9414	0.00782	-0.00172	0.000957	-0.000963	0.00991	0.00124
	-84.9444	0.00774	0.00283	-0.000979	-0.00203	0.0084	0.00106
	-84.9474	0.00577	0.00314	-0.00126	-0.00507	0.00907	-0.000594
	-84.9504	0.00989	0.00346	-0.00155	-0.00246	0.00974	-0.00225
	-84.9534	0.0139	0.00207	0.00199	-0.00126	0.0129	-0.00117
	-84.9564	0.00773	0.000683	0.00553	-0.00289	0.016	-8.47e-05
	-84.9594	0.00203	-0.00188	0.00467	-0.00213	0.0125	-0.00189
	-84.9624	0.00646	8.05e-05	0.00381	0.00146	0.00908	0.00117
	-84.9654	0.00816	0.00176	0.00295	-0.000794	0.0113	0.00423
	-84.9684	0.00379	0.00344	0.00209	-0.00304	0.0136	0.00242
	-84.9714	0.0043	0.00309	0.00164	-0.0018	0.0127	0.00339
	-84.9744	0.00784	0.00274	0.00118	0.00227	0.0119	0.00436
c
		ppm	WT 100 μM	3xdb 100 μM
		-83.5015	19479.2	-5724.22
		-83.5045	17713	-18522.3
		-83.5075	16581.4	-442.329
		-83.5105	19710.5	9911.24
		-83.5135	24224.4	3907.11
		-83.5165	38033.9	5643.32
		-83.5195	48539.1	-4689.82
		-83.5225	36871.2	-27688.5
		-83.5255	25376.6	-27165.7
		-83.5284	15043.7	-10725.9
		-83.5314	5894.75	-7274.63
		-83.5344	7457.02	-12611.7
		-83.5374	25470.9	-8130.04
		-83.5404	26383.3	2994.19
		-83.5434	10556.5	2253.5
		-83.5464	9895.14	-6512.99
		-83.5494	24700.4	-10369.6
		-83.5524	18595.3	-10905.4
		-83.5554	12605.8	-4587.53
		-83.5584	7390.7	6365.23
		-83.5614	4488.42	7497.13
		-83.5644	17074.1	1988.6
		-83.5674	27650.1	4766.87
		-83.5704	24771.4	13147.6
		-83.5734	20504.3	11706.3
		-83.5764	6945.11	3625.7
		-83.5794	-4241.72	3730.48
		-83.5824	444.915	9367.62
		-83.5854	1890.37	5181.74
		-83.5884	-15565.7	-5642.41
		-83.5914	-10079.2	-19446.9
		-83.5944	19930.9	-35265.2
		-83.5974	15728.5	-21611.2
		-83.6004	-5519.03	11954.4
		-83.6034	5476.15	9598.75
		-83.6064	22206.9	-17022.2
		-83.6094	20820.8	-14167.8
		-83.6124	22531.3	8595.12
		-83.6154	22633.7	13088.3
		-83.6184	11995	5243.51
		-83.6214	2747.38	2311.79
		-83.6244	2789.12	2697.61
		-83.6274	4570.23	7382.63
		-83.6304	17962.5	14970.3
		-83.6334	27933.2	19486.8
		-83.6364	15069.3	12102.7
		-83.6394	5571.81	-4064.92
		-83.6424	15748.3	-2027.41
		-83.6454	6246.06	17576.4
		-83.6484	-4109.68	20424.7
		-83.6514	27223.4	13796
		-83.6544	41026.4	9723.59
		-83.6574	12939.5	-6021.36
		-83.6604	-828.481	-29641.6
		-83.6634	14908.8	-25231
		-83.6664	20972.2	-11741.1
		-83.6694	25932	-11640.7
		-83.6724	23540	3562.65
		-83.6754	22861.9	20967
		-83.6784	33598	11249.7
		-83.6814	40150.1	5272.96
		-83.6844	18844.8	30423.8
		-83.6874	2976.87	46640.7
		-83.6904	23301.8	38062.2
		-83.6934	37696.4	21011.2
		-83.6964	15420.3	2717.28
		-83.6994	13284.3	-10147.9
		-83.7024	18801.9	313.257
		-83.7054	5924.84	19727.7
		-83.7084	-2999.25	16574.5
		-83.7114	5488.77	5775.39
		-83.7144	6288.4	8590.35
		-83.7174	7437.23	22949.4
		-83.7204	10907	20951.5
		-83.7234	12106.5	3242.4
		-83.7264	1015	-6287.54
		-83.7294	8315.29	-6118.12
		-83.7324	14455.2	-3878.27
		-83.7354	21415.9	2095.08
		-83.7384	33827.8	10582.9
		-83.7414	43792.9	7389.35
		-83.7444	34717.3	6166.69
		-83.7474	9379.1	24582.3
		-83.7504	2114.8	32085
		-83.7534	11665.6	9328.98
		-83.7564	9614.34	-5202.95
		-83.7594	8998.69	5860.52
		-83.7624	17906	5559.06
		-83.7654	26230.3	-16596.5
		-83.7684	27888	-24867.5
		-83.7714	13054.8	-20304.8
		-83.7744	14749.4	-16018
		-83.7774	34654.7	-9271.18
		-83.7804	47571.9	-869.063
		-83.7834	28243.4	-8445.37
		-83.7864	3022.56	-7089.36
		-83.7894	-1303.96	16118.3
		-83.7924	9835.47	12313.2
		-83.7954	19486	-6176.18
		-83.7984	19277.4	-16.7987
		-83.8014	19068.8	11179
		-83.8044	18860.2	7016.32
		-83.8074	18147.7	11870.9
		-83.8104	14100.8	17395.9
		-83.8134	11456.3	-923.289
		-83.8164	18089.9	-11136.2
		-83.8194	22882.4	4806.2
		-83.8224	15497.9	9745.3
		-83.8254	9516.34	8218.47
		-83.8284	12812.3	21085.5
		-83.8314	15538.1	23384.9
		-83.8344	14495.1	14136.2
		-83.8374	14855.8	5502.77
		-83.8404	24493.2	-2717.15
		-83.8434	32551.1	-1603.76
		-83.8464	30173.1	5780.24
		-83.8494	29550.5	11933.4
		-83.8524	37713.8	17259.8
		-83.8554	27808.3	24740.2
		-83.8584	23901.2	13972.4
		-83.8614	36788.7	-6329.98
		-83.8644	38082	-4456.26
		-83.8674	38087	6027.58
		-83.8704	29589.9	-6285.55
		-83.8734	19511.3	-9253.88
		-83.8764	1810.64	12780.4
		-83.8794	3057.63	20259.8
		-83.8824	6934.19	3679.85
		-83.8854	11162.4	-3505.6
		-83.8884	17709	52.4399
		-83.8914	22614.3	1455.69
		-83.8944	19514.5	1412.82
		-83.8974	34785.7	6295.45
		-83.9004	44206.4	14483.2
		-83.9034	26133.1	17386.1
		-83.9064	33381.4	16743.1
		-83.9094	53719.5	16100
		-83.9124	38126.4	15457
		-83.9154	28401.1	12043
		-83.9184	52615.2	6770.2
		-83.9214	42224.9	1497.44
		-83.9244	14070.3	-3775.32
		-83.9274	30174.3	-11216.4
		-83.9304	48100.2	-20111.5
		-83.9334	35180.3	-19357.7
		-83.9364	25465.7	-2279.94
		-83.9394	31884.9	23252.4
		-83.9424	22466.5	30313.3
		-83.9454	13400.5	19850.1
		-83.9484	6652.21	16352.3
		-83.9514	-382.569	23002.2
		-83.9544	-6479.29	22169.8
		-83.9574	6140.22	11036
		-83.9604	17096.7	-2574.52
		-83.9634	8573.27	-6636.22
		-83.9664	-3307.31	-4299.91
		-83.9694	6643.91	2965.11
		-83.9724	35399.8	13532.1
		-83.9754	40976.8	18294
		-83.9784	18907.3	19167.4
		-83.9814	18669.9	3609.96
		-83.9844	37234.1	-22952.1
		-83.9874	34731.3	-22093.6
		-83.9904	18448.5	-2872.71
		-83.9934	21937.6	6488.61
		-83.9964	30710	9248.23
		-83.9994	22765.3	11905.1
		-84.0024	26742.7	14493.3
		-84.0054	29129.9	17697.7
		-84.0084	21091.7	21314.7
		-84.0114	14644.1	6441.93
		-84.0144	18621.5	-10944.5
		-84.0174	22598.8	1485.03
		-84.0204	26576.2	9726.97
		-84.0234	30060	-6864.05
		-84.0264	30310.3	-11514.7
		-84.0294	30560.6	6894.9
		-84.0324	30810.9	12176.8
		-84.0354	32358.6	-5601.06
		-84.0384	42399.3	-10249.6
		-84.0414	51024.5	8983.11
		-84.0444	50384.8	35363
		-84.0474	48646.2	36105.6
		-84.0504	39718	19703.2
		-84.0534	33150.3	13165.8
		-84.0564	42022.9	13224.8
		-84.0594	47471.9	7734.38
		-84.0624	30533.3	-1466.15
		-84.0654	18613.3	-1417.26
		-84.0684	39501.4	4814.67
		-84.0714	56290.7	13689.9
		-84.0744	43456.6	14465
		-84.0774	15227.3	1862.02
		-84.0804	10289.1	4460.36
		-84.0834	24053.4	20246.5
		-84.0864	36139	16296.7
		-84.0894	30054.8	5944.65
		-84.0924	26286	9993.8
		-84.0954	24320.2	19607.8
		-84.0984	34124.6	28535
		-84.1014	42509.8	28209.8
		-84.1044	41633.7	21704.6
		-84.1074	40284.4	18592.2
		-84.1104	35848.1	17745.5
		-84.1134	31411.8	15665.1
		-84.1164	26975.5	12760.8
		-84.1194	24188.7	19637.4
		-84.1224	32157.3	13302
		-84.1254	39948.4	-2511.82
		-84.1284	46582	3888.93
		-84.1314	52949.1	25011.4
		-84.1344	54738.1	27418.9
		-84.1374	40199.1	19116.4
		-84.1404	42777.6	12461.2
		-84.1434	62149.2	14702
		-84.1464	67441.4	22879
		-84.1494	55993.3	31056.1
		-84.1524	56118.4	39233.2
		-84.1554	55325.1	39387.5
		-84.1584	48552.4	34189.8
		-84.1614	43202.3	28992
		-84.1644	47110.2	23794.3
		-84.1674	51537.3	20470.6
		-84.1704	59342.5	18396.9
		-84.1734	65724.5	16323.2
		-84.1764	62849.2	14249.4
		-84.1794	59914.7	15159.2
		-84.1824	56594.4	18058.1
		-84.1854	53748.8	20957
		-84.1884	56837	23856
		-84.1914	79209.3	34291.6
		-84.1944	101847	49750.8
		-84.1974	92503.8	47100.6
		-84.2004	78682.6	32380.8
		-84.2034	82422.7	21674.1
		-84.2064	79992.4	13641.8
		-84.2094	79165.8	13841.9
		-84.2124	88751.1	19527.2
		-84.2154	96309.2	27386.6
		-84.2184	90708.2	36694.3
		-84.2214	89385.4	41062
		-84.2244	115826	42139
		-84.2274	136085	32615
		-84.2304	116244	16030.5
		-84.2334	100682	10973.9
		-84.2364	112882	13594.2
		-84.2394	124078	20409.1
		-84.2424	128768	30016.9
		-84.2454	134886	39624.7
		-84.2484	150257	49232.4
		-84.2514	166192	49163.4
		-84.2544	185791	42652.8
		-84.2574	203961	44378.3
		-84.2604	210022	51585.5
		-84.2634	199126	59831.9
		-84.2664	203012	68769.8
		-84.2694	236666	77707.8
		-84.2724	260523	86645.7
		-84.2754	266085	78800
		-84.2784	275856	59788.1
		-84.2814	305796	58899.4
		-84.2844	349389	70066.5
		-84.2874	411781	86176.6
		-84.2904	473240	105574
		-84.2934	517867	103551
		-84.2964	578054	87282.9
		-84.2994	669850	87493
		-84.3024	769517	98660.1
		-84.3054	892275	94995.8
		-84.3084	1040000	81471
		-84.3114	1190000	86718.1
		-84.3144	1290000	104444
		-84.3174	1340000	107337
		-84.3204	1330000	100371
		-84.3234	1240000	104942
		-84.3264	1140000	117181
		-84.3294	1030000	129420
		-84.3324	929921	141659
		-84.3354	831835	161212
		-84.3384	754749	185625
		-84.3414	676230	203239
		-84.3444	593241	226226
		-84.3474	542271	251250
		-84.3504	496140	253479
		-84.3534	434203	248134
		-84.3564	392471	256375
		-84.3594	369256	260418
		-84.3624	346191	247417
		-84.3654	326653	235268
		-84.3684	329845	228045
		-84.3714	328104	236074
		-84.3744	294582	274016
		-84.3774	264229	321383
		-84.3804	254292	346498
		-84.3834	245283	362396
		-84.3864	239373	400684
		-84.3894	213717	465710
		-84.3924	184758	539764
		-84.3954	189757	615468
		-84.3984	212104	712057
		-84.4014	213868	855177
		-84.4044	205025	1040000
		-84.4074	214221	1250000
		-84.4104	220527	1540000
		-84.4134	229589	1980000
		-84.4164	256367	2570000
		-84.4194	286858	3330000
		-84.4224	344103	4280000
		-84.4254	424206	5200000
		-84.4284	539134	5540000
		-84.4314	712235	5080000
		-84.4344	992542	4220000
		-84.4374	1320000	3450000
		-84.4404	1510000	2830000
		-84.4434	1440000	2280000
		-84.4464	1220000	1840000
		-84.4494	1030000	1500000
		-84.4524	894101	1210000
		-84.4554	755943	983469
		-84.4584	618856	832943
		-84.4614	485189	717363
		-84.4644	380189	614554
		-84.4674	321822	537696
		-84.4704	285977	473684
		-84.4734	250552	410290
		-84.4764	217822	347306
		-84.4794	188687	306502
		-84.4824	182603	280384
		-84.4854	175077	253648
		-84.4884	158313	226502
		-84.4914	142359	206371
		-84.4944	131602	180981
		-84.4974	120845	157081
		-84.5004	110088	158319
		-84.5034	100866	166581
		-84.5064	101470	151003
		-84.5094	102075	127680
		-84.5124	102680	107907
		-84.5154	102684	80910.4
		-84.5184	98838.8	68947.9
		-84.5214	94993.5	79382.4
		-84.5244	91148.3	86054.3
		-84.5274	87821.9	84030.8
		-84.5304	87815	80590.6
		-84.5334	85882.4	68274.5
		-84.5364	74523.6	50087.8
		-84.5394	83653.3	53163.2
		-84.5424	100859	70299.7
		-84.5454	86135.1	73811.1
		-84.5484	66989.8	68313.3
		-84.5514	67019.1	42328.5
		-84.5544	71545.8	22618.7
		-84.5574	76253.2	40787.1
		-84.5604	82115	55512.4
		-84.5634	84572.7	44541.2
		-84.5664	65290.8	25245.2
		-84.5694	49383.7	26184.8
		-84.5724	55022.9	40497.3
		-84.5754	58092.8	42394.3
		-84.5784	44763	36087.3
		-84.5814	34809.7	41344.8
		-84.5844	46401.1	54242.7
		-84.5874	56213.4	47727.9
		-84.5904	54676.7	28389.1
		-84.5934	53140	20615.9
		-84.5964	51603.2	20481.9
		-84.5994	50283.4	25640.6
		-84.6024	50346	34294.6
		-84.6054	48960.1	37991.3
		-84.6084	38342.2	38414.6
		-84.6114	30682.2	33260.7
		-84.6144	41870.3	24424.6
		-84.6174	51609.3	15588.4
		-84.6204	52116.9	6752.26
		-84.6234	51846.9	5663.05
		-84.6264	46624.8	9687.28
		-84.6294	41402.8	13711.5
		-84.6324	36180.8	17735.7
		-84.6354	33285.1	18350.9
		-84.6384	45196.3	16716.6
		-84.6414	54690	15082.3
		-84.6444	48800.4	13447.9
		-84.6474	41463.8	19268.4
		-84.6504	24921.6	30006.8
		-84.6534	11765.5	25867.1
		-84.6564	20144.4	11913.6
		-84.6594	27222.9	14285.6
		-84.6624	26033.9	27424.6
		-84.6654	24844.9	19070.6
		-84.6684	23655.8	-3456.5
		-84.6714	23616.5	-9733.78
		-84.6744	30882.8	-5296.95
		-84.6774	36696.6	-860.116
		-84.6804	33282.4	3576.71
		-84.6834	30080.2	2536.07
		-84.6864	28223.6	-2115.11
		-84.6894	27820.4	1502.07
		-84.6924	36644.3	10568.6
		-84.6954	44495.3	18575.8
		-84.6984	46171.1	25884.8
		-84.7014	45423.5	28438.9
		-84.7044	29298.5	17936.8
		-84.7074	15294.4	793.469
		-84.7104	14745.1	3429.78
		-84.7134	16620.3	19761.1
		-84.7164	33871.7	16652.2
		-84.7194	48122.2	2046.14
		-84.7224	43345.2	8328.38
		-84.7254	40023.5	22720.6
		-84.7284	48838.2	13993.8
		-84.7314	73555	-1911.07
		-84.7344	77275.5	5916.57
		-84.7374	51521.6	15027.2
		-84.7404	36751.6	6450.94
		-84.7434	40438.5	2523.86
		-84.7464	44179.4	5958.65
		-84.7494	48102.5	3188.83
		-84.7524	53178.5	-3664.68
		-84.7554	57222.3	4270.28
		-84.7584	54733	12009
		-84.7614	50786.2	6388.87
		-84.7644	37616.4	16134.9
		-84.7674	27741.9	35481.2
		-84.7704	38714.4	32689.4
		-84.7734	45312.4	12489.5
		-84.7764	24243.5	9291.49
		-84.7794	8765.63	17915.2
		-84.7824	28638.5	15792.2
		-84.7854	45107.4	7758.88
		-84.7884	40059.2	10064.6
		-84.7914	33213.5	25676.7
		-84.7944	15009.4	35812.9
		-84.7974	393.492	28246
		-84.8004	8445.59	33197.2
		-84.8034	14855.2	44689.1
		-84.8064	13812	32031.2
		-84.8094	31027	11282.2
		-84.8124	42221.2	13663.6
		-84.8154	21951.7	24652.1
		-84.8184	-6.07451	12849.4
		-84.8214	-1089.53	5375.64
		-84.8244	13192.8	9324.84
		-84.8274	26835.9	8306.86
		-84.8304	36445.5	4025.43
		-84.8334	43619	8023.09
		-84.8364	35427.9	17459.4
		-84.8394	27937.3	14974.4
		-84.8424	24863.9	4659.35
		-84.8454	21790.4	9248.25
		-84.8484	18717	23625.1
		-84.8514	17258.7	27651.4
		-84.8544	25978.3	24881
		-84.8574	32259.5	22110.7
		-84.8604	23178.3	19340.3
		-84.8634	16620	15276
		-84.8664	25951.5	10362.3
		-84.8694	31867.5	5448.56
		-84.8724	16277.9	534.824
		-84.8754	5629.75	693.961
		-84.8784	26086.7	4182.34
		-84.8814	42150.3	7670.72
		-84.8844	30565.9	11159.1
		-84.8874	22010.3	4856.54
		-84.8904	32510	-7869.88
		-84.8934	40567.7	-5685.84
		-84.8964	33266.6	6279.67
		-84.8994	26240.3	15035.1
		-84.9024	20941.8	21685
		-84.9054	17109.1	20050.4
		-84.9084	22491.1	12982.6
		-84.9114	27132.3	5992.39
		-84.9144	27118.4	-946.863
		-84.9174	27104.5	399.27
		-84.9204	27090.6	7177.76
		-84.9234	26862.8	1009.65
		-84.9264	25291.3	-13645.8
		-84.9294	23719.8	-15457.6
		-84.9324	22148.3	-8850.55
		-84.9354	22681.8	-15822.8
		-84.9384	36428.7	-11805.9
		-84.9414	45282.4	5244.8
		-84.9444	23427.8	2405.76
		-84.9474	5978.07	-3831.73
		-84.9504	16164.9	-3756.72
		-84.9534	23414.3	-4924.91
		-84.9564	12240.1	-6907.55
		-84.9594	3292.43	-6636.75
		-84.9624	8305.86	-4889.88
		-84.9654	13319.3	6803.75
		-84.9684	18332.7	25011.9
		-84.9714	22305.1	20527.8
		-84.9744	19753.2	1183.62
		-84.9774	20141.4	-1580.8
		-84.9804	38950.5	6510.52
		-84.9834	53447.8	5385.35
		-84.9864	40938.6	-1773.6
		-84.9894	31370.9	-13907
		-84.9924	40222.6	-29296.6
		-84.9954	46591.8	-20745.3
		-84.9984	37420.3	3475.08
d		linewidth (Hz)
	aC out	12.6513	12.8495	12.1333	12.039	11.4108	12.1977	13.02	12.1911
	aC in narrow	24.1432	24.1547	22.4778	22.4714	21.1454	24.5175	22.7629	21.9707
	aC in broad	107.633	113.837	111.773	106.862	111.027	121.237	118.022	109.891
e		aC-in																aC-out
	T2 time (ms)	normalized signal intensity																normalized signal intensity
	0.4	1	1	1	1	1	1	1	1	1	1	1	1	1	1	1		1	1	1	1	1	1	1	1	1	1	1	1	1	1	1
	1.6	0.917513	0.957726	0.985696	0.916528	0.947619	0.972414	0.938253	0.973501	0.954279	0.992832	0.988743	1.01294	0.807531	1.01942	0.995973		0.938889	0.930894	1.00235	0.921811	0.965657	0.975138	0.967797	0.982583	0.983845	0.988487	0.979198	1.01569	0.929314	0.993158	0.997399
	2.4	0.78934	0.833819	0.862159	0.806344	0.836508	0.874138	0.754518	0.868898	0.820633	0.890681	0.900563	0.867314	0.74477	0.915858	0.867114		0.82963	0.867886	0.910588	0.851852	0.882828	0.906077	0.815254	0.899855	0.84168	0.904605	0.890045	0.903922	0.879418	0.901938	0.846554
	3.2	0.53934	0.577259	0.611183	0.590985	0.593651	0.641379	0.563253	0.622036	0.616647	0.636201	0.662289	0.648867	0.598326	0.653722	0.660403		0.744444	0.772358	0.792941	0.771605	0.785859	0.850829	0.766102	0.835994	0.836834	0.868421	0.821694	0.854902	0.850312	0.874572	0.850455
	6.4	0.333756	0.351312	0.378414	0.343907	0.360317	0.394828	0.346386	0.39749	0.359906	0.417563	0.41651	0.399676	0.410042	0.406149	0.444295		0.574074	0.595528	0.677647	0.633745	0.622222	0.709945	0.635593	0.656023	0.663974	0.682566	0.655275	0.676471	0.685031	0.696693	0.755527
	12.8	0.214467	0.241983	0.261378	0.227045	0.246032	0.287931	0.224398	0.248257	0.254396	0.30466	0.290807	0.291262	0.23431	0.312298	0.346309		0.483333	0.489837	0.590588	0.510288	0.517172	0.635359	0.538983	0.56894	0.510501	0.557566	0.557207	0.54902	0.586279	0.594071	0.642393
	25.6	0.13198	0.134402	0.16515	0.155426	0.157302	0.186207	0.158133	0.174338	0.150059	0.182796	0.185741	0.173139	0.146444	0.190939	0.190604		0.409259	0.418699	0.501176	0.411523	0.440404	0.535912	0.477966	0.477504	0.46042	0.509868	0.478455	0.480392	0.475052	0.508552	0.582575
	51.2	0.0215736	0.0284257	0.0470741	0.0337229	0.0325397	0.052931	0.0429217	0.044212	0.0348183	0.0292115	0.041651	0.0580906	0.06053	0.0231392	0.0726175		0.192593	0.205285	0.203529	0.213992	0.222222	0.208287	0.259322	0.253991	0.239095	0.248355	0.245171	0.233333	0.269231	0.259977	0.26658
	102.4	-0.0016371	-0.0027259	-5.15e-05	0.0007813	0.00685714	0.0012569	0.00198795	0.0046304	0.00785463	0.00727599	0.00193246	0.0127346	0.00228731	-0.0044498	0.0210738		0.0487037	0.0599594	0.0555294	0.0600823	0.059798	0.068232	0.0720339	0.0818578	0.0759289	0.0879934	0.0802377	0.0680392	0.081289	0.0808438	0.0841352
f		10% D2O							90% D2O
		ppm	fit component 1	fit component 2	fit component 3	raw spectrum			ppm	fit component 1	fit component 2	fit component 3	raw spectrum
		-85.005	26407.5	-9507.33	-3694.11	35902.2			-85.0043	-24132.7	-17519.7	979.381	10718.3
		-85.0035	26560.9	-9498.17	-3662.44	36096.4			-85.0028	-24125.2	-17487.9	1075.51	10853.7
		-85.002	26715.2	-9488.94	-3630.58	36291.8			-85.0013	-24117.6	-17455.9	1172.16	10990
		-85.002	26715.5	-9488.92	-3630.51	36292.2			-85.0013	-24117.6	-17455.9	1172.36	10990.2
		-85.0005	26870.5	-9479.63	-3598.51	36488.5			-84.9998	-24109.9	-17423.7	1269.34	11127
		-84.999	27026.7	-9470.26	-3566.25	36686.3			-84.9983	-24102.2	-17391.4	1367.03	11264.7
		-84.999	27027.3	-9470.23	-3566.12	36687.1			-84.9983	-24102.2	-17391.2	1367.42	11265.3
		-84.9975	27183.9	-9460.82	-3533.78	36885.4			-84.9968	-24094.5	-17358.8	1465.26	11403.3
		-84.996	27342	-9451.31	-3501.11	37085.7			-84.9953	-24086.6	-17326.1	1564.01	11542.6
		-84.996	27343	-9451.25	-3500.92	37086.9			-84.9953	-24086.6	-17325.9	1564.61	11543.4
		-84.9945	27501.1	-9441.72	-3468.24	37287.2			-84.9938	-24078.8	-17293.1	1663.31	11682.7
		-84.9931	27661.2	-9432.07	-3435.16	37490			-84.9923	-24070.8	-17260	1763.14	11823.6
		-84.993	27662.5	-9431.99	-3434.89	37491.7			-84.9923	-24070.8	-17259.7	1763.94	11824.7
		-84.9916	27822.2	-9422.33	-3401.87	37694.1			-84.9908	-24062.8	-17226.7	1863.52	11965.3
		-84.9901	27984.3	-9412.53	-3368.37	37899.5			-84.9893	-24054.8	-17193.1	1964.44	12107.8
		-84.99	27985.9	-9412.43	-3368.03	37901.5			-84.9893	-24054.7	-17192.8	1965.46	12109.3
		-84.9886	28147.3	-9402.65	-3334.65	38106.1			-84.9878	-24046.7	-17159.4	2065.92	12251.1
		-84.9871	28311.4	-9392.69	-3300.73	38314.1			-84.9863	-24038.5	-17125.5	2167.95	12395.3
		-84.987	28313.4	-9392.57	-3300.32	38316.6			-84.9863	-24038.4	-17125.1	2169.18	12397
		-84.9856	28476.5	-9382.66	-3266.58	38523.3			-84.9848	-24030.2	-17091.4	2270.54	12540.2
		-84.9841	28642.6	-9372.55	-3232.22	38733.9			-84.9833	-24022	-17057	2373.7	12686
		-84.984	28644.9	-9372.4	-3231.74	38736.9			-84.9833	-24021.8	-17056.5	2375.15	12688.1
		-84.9826	28809.7	-9362.36	-3197.64	38945.8			-84.9818	-24013.6	-17022.5	2477.42	12832.7
		-84.9811	28977.9	-9352.09	-3162.84	39159.1			-84.9803	-24005.2	-16987.7	2581.72	12980.1
		-84.981	28980.6	-9351.92	-3162.28	39162.5			-84.9803	-24005	-16987.2	2583.4	12982.5
		-84.9796	29147.1	-9341.74	-3127.82	39373.7			-84.9788	-23996.7	-16952.8	2686.59	13128.4
		-84.9781	29317.4	-9331.31	-3092.57	39589.6			-84.9773	-23988.1	-16917.6	2792.04	13277.6
		-84.978	29320.5	-9331.12	-3091.93	39593.5			-84.9773	-23988	-16917	2793.95	13280.3
		-84.9766	29488.8	-9320.8	-3057.09	39807			-84.9759	-23979.5	-16882.2	2898.08	13427.6
		-84.9751	29661.2	-9310.21	-3021.38	40025.7			-84.9744	-23970.9	-16846.6	3004.71	13578.5
		-84.975	29664.7	-9310	-3020.67	40030.1			-84.9743	-23970.7	-16845.9	3006.85	13581.6
		-84.9736	29834.7	-9299.53	-2985.45	40245.9			-84.9729	-23962.1	-16810.8	3111.93	13730.3
		-84.9721	30009.4	-9288.77	-2949.28	40467.4			-84.9714	-23953.3	-16774.8	3219.75	13883
		-84.972	30013.2	-9288.54	-2948.48	40472.3			-84.9713	-23953.1	-16774	3222.13	13886.4
		-84.9706	30185.1	-9277.93	-2912.87	40690.4			-84.9699	-23944.4	-16738.5	3328.17	14036.5
		-84.9691	30361.9	-9267	-2876.23	40914.8			-84.9684	-23935.5	-16702	3437.2	14191
		-84.969	30366.2	-9266.73	-2875.34	40920.2			-84.9683	-23935.3	-16701.2	3439.83	14194.7
		-84.9676	30539.9	-9255.98	-2839.34	41140.7			-84.9669	-23926.5	-16665.3	3546.83	14346.3
		-84.9661	30719	-9244.87	-2802.22	41368			-84.9654	-23917.4	-16628.4	3657.09	14502.6
		-84.966	30723.7	-9244.58	-2801.25	41374			-84.9653	-23917.1	-16627.5	3659.97	14506.7
		-84.9646	30899.2	-9233.68	-2764.85	41596.8			-84.9639	-23908.2	-16591.3	3767.96	14659.8
		-84.9631	31080.6	-9222.4	-2727.24	41827.1			-84.9624	-23899	-16553.9	3879.46	14817.9
		-84.963	31085.8	-9222.08	-2726.18	41833.6			-84.9623	-23898.7	-16552.9	3882.6	14822.3
		-84.9616	31263.2	-9211.02	-2689.38	42058.9			-84.9609	-23889.7	-16516.3	3991.59	14976.9
		-84.9601	31446.9	-9199.56	-2651.27	42292.2			-84.9594	-23880.3	-16478.5	4104.36	15136.9
		-84.96	31452.5	-9199.21	-2650.12	42299.2			-84.9593	-23880	-16477.3	4107.76	15141.7
		-84.9586	31631.8	-9188	-2612.91	42527			-84.9579	-23870.9	-16440.4	4217.76	15297.8
		-84.9571	31818	-9176.35	-2574.29	42763.4			-84.9564	-23861.4	-16402.1	4331.81	15459.7
		-84.957	31823.9	-9175.97	-2573.05	42771			-84.9563	-23861.1	-16400.8	4335.48	15464.9
		-84.9556	32005.3	-9164.6	-2535.42	43001.3			-84.9549	-23851.8	-16363.5	4446.5	15622.5
		-84.9541	32193.8	-9152.76	-2496.29	43240.8			-84.9534	-23842.1	-16324.7	4561.85	15786.3
		-84.954	32200.2	-9152.35	-2494.95	43249			-84.9533	-23841.8	-16323.4	4565.8	15791.9
		-84.9526	32383.5	-9140.82	-2456.89	43481.9			-84.9519	-23832.4	-16285.7	4677.86	15951.1
		-84.9511	32574.5	-9128.79	-2417.24	43724.6			-84.9504	-23822.5	-16246.4	4794.54	16116.8
		-84.951	32581.4	-9128.35	-2415.8	43733.4			-84.9503	-23822.2	-16245	4798.76	16122.8
		-84.9496	32766.7	-9116.65	-2377.32	43968.9			-84.9489	-23812.6	-16206.9	4911.88	16283.6
		-84.9481	32960.2	-9104.42	-2337.12	44214.8			-84.9474	-23802.7	-16167.1	5029.89	16451.4
		-84.948	32967.6	-9103.95	-2335.59	44224.2			-84.9473	-23802.3	-16165.6	5034.4	16457.8
		-84.9466	33154.9	-9092.08	-2296.66	44462.3			-84.9459	-23792.6	-16127.1	5148.58	16620.1
		-84.9451	33351	-9079.64	-2255.93	44711.5			-84.9444	-23782.5	-16086.9	5267.96	16789.9
		-84.945	33358.8	-9079.14	-2254.29	44721.5			-84.9443	-23782.1	-16085.2	5272.76	16796.7
		-84.9436	33548.3	-9067.1	-2214.92	44962.3			-84.9429	-23772.3	-16046.3	5388.03	16960.7
		-84.9421	33746.9	-9054.46	-2173.63	45214.9			-84.9414	-23762	-16005.5	5508.79	17132.6
		-84.942	33755.3	-9053.92	-2171.89	45225.6			-84.9413	-23761.5	-16003.8	5513.89	17139.8
		-84.9406	33946.8	-9041.71	-2132.06	45469.1			-84.9399	-23751.6	-15964.5	5630.25	17305.5
		-84.9391	34148	-9028.85	-2090.21	45725.1			-84.9384	-23741.1	-15923.2	5752.42	17479.4
		-84.939	34156.9	-9028.28	-2088.36	45736.4			-84.9383	-23740.7	-15921.4	5757.82	17487.1
		-84.9376	34350.6	-9015.89	-2048.07	45982.7			-84.9369	-23730.6	-15881.6	5875.3	17654.4
		-84.9361	34554.5	-9002.81	-2005.65	46242.2			-84.9354	-23719.9	-15839.8	5998.89	17830.5
		-84.936	34564	-9002.21	-2003.69	46254.2			-84.9353	-23719.4	-15837.9	6004.6	17838.6
		-84.9346	34759.8	-8989.63	-1962.93	46503.3			-84.9339	-23709.2	-15797.7	6123.2	18007.6
		-84.9331	34966.5	-8976.33	-1919.92	46766.3			-84.9324	-23698.4	-15755.3	6248.25	18185.8
		-84.933	34976.4	-8975.69	-1917.85	46779			-84.9323	-23697.9	-15753.3	6254.28	18194.4
		-84.9316	35174.5	-8962.93	-1876.62	47031			-84.9309	-23687.5	-15712.7	6374.02	18365.1
		-84.9301	35383.9	-8949.4	-1833.01	47297.6			-84.9294	-23676.5	-15669.8	6500.54	18545.6
		-84.93	35394.4	-8948.72	-1830.82	47311			-84.9293	-23676	-15667.6	6506.9	18554.6
		-84.9286	35594.7	-8935.77	-1789.1	47566			-84.9279	-23665.4	-15626.6	6627.79	18727.1
		-84.9271	35807	-8922.01	-1744.89	47836.2			-84.9264	-23654.3	-15583.1	6755.8	18909.8
		-84.927	35818.1	-8921.29	-1742.58	47850.3			-84.9263	-23653.7	-15580.8	6762.49	18919.3
		-84.9256	36020.7	-8908.14	-1700.37	48108.2			-84.9249	-23643	-15539.3	6884.57	19093.5
		-84.9241	36235.8	-8894.15	-1655.54	48382.2			-84.9234	-23631.6	-15495.3	7014.1	19278.5
		-84.924	36247.5	-8893.39	-1653.11	48397.1			-84.9233	-23631	-15492.9	7021.13	19288.5
		-84.9226	36452.4	-8880.04	-1610.4	48658			-84.9219	-23620.2	-15451	7144.39	19464.5
		-84.9211	36670.4	-8865.8	-1564.94	48935.8			-84.9204	-23608.6	-15406.3	7275.46	19651.8
		-84.921	36682.7	-8865	-1562.38	48951.4			-84.9203	-23608	-15403.8	7282.84	19662.3
		-84.9196	36889.9	-8851.45	-1519.17	49215.4			-84.9189	-23597	-15361.4	7407.31	19840.2
		-84.9181	37111	-8836.97	-1473.07	49497			-84.9174	-23585.3	-15316.2	7539.94	20029.8
		-84.918	37123.9	-8836.12	-1470.38	49513.5			-84.9173	-23584.6	-15313.6	7547.68	20040.8
		-84.9166	37333.5	-8822.36	-1426.64	49780.6			-84.9159	-23573.4	-15270.7	7673.37	20220.5
		-84.9151	37557.6	-8807.62	-1379.89	50066.2			-84.9144	-23561.5	-15224.9	7807.6	20412.5
		-84.915	37571.1	-8806.73	-1377.07	50083.4			-84.9143	-23560.8	-15222.2	7815.69	20424.1
		-84.9136	37783.2	-8792.75	-1332.81	50353.7			-84.9129	-23549.4	-15178.8	7942.63	20605.7
		-84.9121	38010.3	-8777.76	-1285.39	50643.3			-84.9114	-23537.3	-15132.4	8078.47	20800.1
		-84.912	38024.5	-8776.82	-1282.43	50661.3			-84.9113	-23536.5	-15129.5	8086.94	20812.2
		-84.9106	38239	-8762.63	-1237.64	50934.9			-84.9099	-23525.1	-15085.7	8215.13	20995.7
		-84.9091	38469.3	-8747.37	-1189.54	51228.5			-84.9084	-23512.7	-15038.7	8352.62	21192.6
		-84.909	38484.2	-8746.38	-1186.44	51247.4			-84.9083	-23511.9	-15035.6	8361.46	21205.2
		-84.9076	38701.2	-8731.97	-1141.1	51524.3			-84.9069	-23500.2	-14991.3	8490.93	21390.7
		-84.9061	38934.7	-8716.43	-1092.31	51822.1			-84.9054	-23487.7	-14943.6	8630.09	21590
		-84.906	38950.2	-8715.4	-1089.07	51841.9			-84.9053	-23486.9	-14940.5	8639.32	21603.3
		-84.9046	39169.9	-8700.76	-1043.18	52122			-84.9039	-23475	-14895.7	8770.09	21790.7
		-84.9031	39406.6	-8684.94	-993.685	52424.1			-84.9024	-23462.2	-14847.4	8910.94	21992.6
		-84.903	39422.8	-8683.86	-990.3	52444.8			-84.9023	-23461.4	-14844.1	8920.57	22006.4
		-84.9016	39645	-8668.98	-943.837	52728.3			-84.9009	-23449.3	-14798.7	9052.64	22195.8
		-84.9001	39885.1	-8652.88	-893.627	53034.7			-84.8994	-23436.3	-14749.8	9195.22	22400.4
		-84.9	39902	-8651.75	-890.092	53056.3			-84.8993	-23435.4	-14746.4	9205.25	22414.8
		-84.8986	40126.9	-8636.64	-843.054	53343.3			-84.8979	-23423.2	-14700.5	9338.66	22606.2
		-84.8971	40370.4	-8620.24	-792.113	53654.1			-84.8964	-23410	-14650.9	9482.99	22813.4
		-84.897	40388	-8619.05	-788.423	53676.6			-84.8963	-23409	-14647.3	9493.43	22828.4
		-84.8956	40615.6	-8603.7	-740.8	53967.2			-84.8949	-23396.7	-14601	9628.2	23021.9
		-84.8941	40862.5	-8587.01	-689.113	54282.5			-84.8934	-23383.2	-14550.7	9774.3	23231.7
		-84.894	40880.9	-8585.76	-685.265	54305.9			-84.8933	-23382.2	-14546.9	9785.17	23247.4
		-84.8926	41111.2	-8570.16	-637.047	54600			-84.8919	-23369.6	-14500	9921.3	23443
		-84.8911	41361.6	-8553.16	-584.598	54919.9			-84.8904	-23355.9	-14449	10069.2	23655.6
		-84.891	41380.7	-8551.86	-580.588	54944.4			-84.8903	-23354.9	-14445.1	10080.5	23671.8
		-84.8897	41613.8	-8536	-531.764	55242.1			-84.8889	-23342.1	-14397.7	10218	23869.5
		-84.8882	41867.8	-8518.68	-478.539	55566.7			-84.8874	-23328.1	-14346	10367.8	24084.9
		-84.888	41887.8	-8517.32	-474.363	55592.2			-84.8873	-23327	-14342	10379.5	24101.8
		-84.8867	42123.7	-8501.21	-424.921	55893.6			-84.8859	-23314.1	-14294	10518.5	24301.7
		-84.8852	42381.3	-8483.57	-370.905	56222.9			-84.8844	-23299.9	-14241.6	10670.1	24519.9
		-84.885	42402.1	-8482.15	-366.558	56249.4			-84.8843	-23298.7	-14237.4	10682.3	24537.5
		-84.8837	42640.8	-8465.76	-316.488	56554.7			-84.8829	-23285.5	-14188.9	10822.7	24739.6
		-84.8822	42902.2	-8447.79	-261.666	56888.8			-84.8814	-23271.1	-14135.7	10976.2	24960.7
		-84.882	42923.8	-8446.31	-257.142	56916.4			-84.8813	-23269.9	-14131.3	10988.8	24978.9
		-84.8807	43165.5	-8429.66	-206.433	57225.5			-84.8799	-23256.5	-14082.2	11130.7	25183.2
		-84.8792	43430.6	-8411.35	-150.787	57564.6			-84.8784	-23241.8	-14028.4	11286.1	25407.2
		-84.879	43453.1	-8409.8	-146.084	57593.3			-84.8783	-23240.5	-14023.8	11299.2	25426.2
		-84.8777	43697.7	-8392.86	-94.7235	57906.2			-84.8769	-23226.9	-13974.1	11442.5	25632.7
		-84.8762	43966.8	-8374.21	-38.2378	58250.4			-84.8754	-23212	-13919.5	11599.9	25859.8
		-84.876	43990	-8372.59	-33.35	58280.2			-84.8753	-23210.7	-13914.8	11613.6	25879.4
		-84.8747	44237.8	-8355.37	18.6742	58597.2			-84.8739	-23196.8	-13864.5	11758.4	26088.3
		-84.8732	44510.7	-8336.36	76.0166	58946.5			-84.8725	-23181.6	-13809.1	11917.8	26318.3
		-84.873	44534.9	-8334.67	81.094	58977.4			-84.8723	-23180.2	-13804.2	11931.9	26338.7
		-84.8717	44785.7	-8317.16	133.794	59298.4			-84.871	-23166.2	-13753.4	12078.2	26549.9
		-84.8702	45062.7	-8297.78	192.011	59653			-84.8695	-23150.6	-13697.2	12239.6	26783.1
		-84.87	45087.7	-8296.03	197.283	59685.1			-84.8693	-23149.2	-13692.1	12254.2	26804.2
		-84.8687	45341.7	-8278.22	250.671	60010.2			-84.868	-23135	-13640.6	12402.1	27017.8
		-84.8672	45622.7	-8258.46	309.78	60370.2			-84.8665	-23119.1	-13583.7	12565.6	27254.1
		-84.867	45648.8	-8256.63	315.252	60403.5			-84.8663	-23117.7	-13578.4	12580.7	27276
		-84.8657	45905.9	-8238.52	369.341	60732.8			-84.865	-23103.1	-13526.3	12730.1	27492
		-84.8642	46191.1	-8218.38	429.36	61098.2			-84.8635	-23087	-13468.5	12895.8	27731.5
		-84.864	46218.1	-8216.47	435.037	61132.8			-84.8633	-23085.5	-13463.1	12911.4	27754.2
		-84.8627	46478.5	-8198.04	489.841	61466.4			-84.862	-23070.7	-13410.3	13062.4	27972.6
		-84.8612	46768	-8177.51	550.79	61837.4			-84.8605	-23054.3	-13351.7	13230.2	28215.4
		-84.861	46795.9	-8175.52	556.677	61873.2			-84.8603	-23052.7	-13346.1	13246.4	28238.9
		-84.8597	47059.6	-8156.77	612.209	62211.2			-84.859	-23037.7	-13292.7	13399	28459.9
		-84.8582	47353.5	-8135.83	674.106	62587.8			-84.8575	-23021	-13233.2	13568.9	28706
		-84.858	47382.4	-8133.76	680.21	62625			-84.8573	-23019.3	-13227.4	13585.6	28730.2
		-84.8567	47649.5	-8114.68	736.484	62967.4			-84.856	-23004.1	-13173.4	13739.9	28953.7
		-84.8552	47947.7	-8093.32	799.349	63349.9			-84.8545	-22987	-13113	13912	29203.2
		-84.855	47977.7	-8091.17	805.675	63388.3			-84.8543	-22985.3	-13107	13929.3	29228.3
		-84.8537	48248.2	-8071.76	862.705	63735.3			-84.853	-22969.8	-13052.3	14085.3	29454.5
		-84.8522	48551	-8049.97	926.558	64123.7			-84.8515	-22952.4	-12991.1	14259.6	29707.4
		-84.852	48582.1	-8047.73	933.113	64163.5			-84.8513	-22950.6	-12984.8	14277.5	29733.3
		-84.8507	48856	-8027.97	990.913	64515.1			-84.85	-22934.9	-12929.5	14435.1	29962.1
		-84.8492	49163.4	-8005.75	1055.78	64909.5			-84.8485	-22917.1	-12867.4	14611.8	30218.6
		-84.849	49195.6	-8003.42	1062.56	64950.8			-84.8483	-22915.3	-12860.9	14630.3	30245.4
		-84.8477	49473.1	-7983.3	1121.15	65307.1			-84.847	-22899.2	-12804.8	14789.6	30476.8
		-84.8462	49785.2	-7960.63	1187.04	65707.7			-84.8455	-22881.2	-12741.8	14968.6	30736.8
		-84.846	49818.5	-7958.2	1194.07	65750.4			-84.8453	-22879.2	-12735.1	14987.6	30764.6
		-84.8447	50099.6	-7937.72	1253.46	66111.5			-84.844	-22862.9	-12678.4	15148.7	30998.7
		-84.8432	50416.5	-7914.59	1320.41	66518.4			-84.8425	-22844.5	-12614.5	15330.1	31262.4
		-84.843	50450.9	-7912.07	1327.68	66562.6			-84.8423	-22842.5	-12607.5	15349.8	31291
		-84.8417	50735.7	-7891.21	1387.89	66928.5			-84.841	-22825.9	-12550.1	15512.6	31527.9
		-84.8402	51057.5	-7867.6	1455.91	67341.9			-84.8395	-22807.1	-12485.2	15696.4	31795.3
		-84.84	51093.1	-7864.98	1463.44	67387.7			-84.8393	-22805	-12478	15716.7	31824.9
		-84.8387	51381.7	-7843.75	1524.47	67758.5			-84.838	-22788.2	-12419.8	15881.3	32064.6
		-84.8372	51708.4	-7819.64	1593.59	68178.5			-84.8365	-22769	-12354	16067.5	32335.8
		-84.837	51745.3	-7816.92	1601.38	68225.8			-84.8363	-22766.8	-12346.6	16088.5	32366.4
		-84.8357	52037.7	-7795.29	1663.27	68601.8			-84.835	-22749.6	-12287.6	16255	32609
		-84.8342	52369.5	-7770.69	1733.51	69028.4			-84.8335	-22730.1	-12220.8	16443.7	32884
		-84.834	52407.6	-7767.86	1741.57	69077.4			-84.8333	-22727.9	-12213.2	16465.3	32915.6
		-84.8327	52703.9	-7745.83	1804.32	69458.5			-84.832	-22710.4	-12153.5	16633.6	33161.1
		-84.8312	53040.9	-7720.71	1875.71	69892			-84.8305	-22690.4	-12085.7	16824.9	33440.1
		-84.831	53080.2	-7717.77	1884.04	69942.6			-84.8303	-22688.1	-12077.7	16847.2	33472.6
		-84.8297	53380.5	-7695.33	1947.68	70329			-84.829	-22670.3	-12017.3	17017.4	33721.1
		-84.8282	53722.9	-7669.68	2020.24	70769.5			-84.8275	-22650	-11948.4	17211.2	34004.1
		-84.828	53763.5	-7666.63	2028.86	70821.8			-84.8273	-22647.6	-11940.3	17234.2	34037.7
		-84.8267	54067.9	-7643.75	2093.39	71213.6			-84.826	-22629.4	-11879.1	17406.3	34289.1
		-84.8252	54415.6	-7617.56	2167.15	71661.3			-84.8245	-22608.7	-11809.1	17602.8	34576.2
		-84.825	54457.6	-7614.39	2176.06	71715.3			-84.8243	-22606.2	-11800.7	17626.5	34610.9
		-84.8237	54766	-7591.08	2241.51	72112.6			-84.823	-22587.7	-11738.7	17800.5	34865.4
		-84.8222	55119.3	-7564.32	2316.49	72567.6			-84.8215	-22566.5	-11667.7	17999.6	35156.7
		-84.822	55162.7	-7561.03	2325.7	72623.4			-84.8213	-22563.9	-11659	18024.1	35192.4
		-84.8207	55475.3	-7537.28	2392.1	73026.3			-84.82	-22545.2	-11596.2	18200.1	35450.1
		-84.8192	55834.2	-7509.94	2468.33	73488.7			-84.8185	-22523.5	-11524.1	18402	35745.6
		-84.819	55879	-7506.52	2477.84	73546.5			-84.8183	-22520.8	-11515.1	18427.1	35782.5
		-84.8177	56196	-7482.31	2545.19	73955			-84.817	-22501.7	-11451.5	18605.2	36043.3
		-84.8162	56560.6	-7454.38	2622.7	74425.1			-84.8155	-22479.6	-11378.3	18809.8	36343.1
		-84.816	56606.9	-7450.83	2632.54	74484.7			-84.8153	-22476.8	-11369	18835.7	36381.2
		-84.8147	56928.2	-7426.14	2700.86	74899			-84.814	-22457.4	-11304.6	19015.8	36645.2
		-84.8132	57298.8	-7397.6	2779.68	75376.9			-84.8125	-22434.8	-11230.3	19223.3	36949.5
		-84.813	57346.5	-7393.92	2789.84	75438.5			-84.8123	-22431.9	-11220.7	19250	36988.7
		-84.8117	57672.3	-7368.75	2859.16	75858.8			-84.811	-22412.1	-11155.4	19432.2	37256
		-84.8102	58048.8	-7339.57	2939.32	76344.7			-84.8095	-22389.1	-11079.9	19642.5	37564.8
		-84.81	58098.1	-7335.75	2949.81	76408.3			-84.8093	-22386.1	-11070	19670	37605.2
		-84.8087	58428.4	-7310.08	3020.15	76834.6			-84.808	-22365.8	-11003.8	19854.2	37875.9
		-84.8072	58811.1	-7280.26	3101.67	77328.6			-84.8065	-22342.3	-10927.1	20067.5	38189.3
		-84.807	58862	-7276.29	3112.51	77394.3			-84.8063	-22339.2	-10917	20095.8	38230.9
		-84.8057	59196.9	-7250.1	3183.89	77826.8			-84.805	-22318.6	-10849.9	20282.2	38505
		-84.8042	59585.9	-7219.61	3266.81	78329.2			-84.8035	-22294.6	-10772	20498.5	38823.1
		-84.804	59638.3	-7215.5	3278	78397			-84.8033	-22291.4	-10761.5	20527.6	38866
		-84.8027	59978	-7188.78	3350.45	78835.8			-84.802	-22270.4	-10693.5	20716.2	39143.6
		-84.8012	60373.4	-7157.61	3434.8	79346.7			-84.8005	-22245.9	-10614.4	20935.5	39466.5
		-84.801	60427.5	-7153.33	3446.35	79416.6			-84.8003	-22242.5	-10603.6	20965.5	39510.7
		-84.7997	60772	-7126.08	3519.88	79861.9			-84.799	-22221.1	-10534.7	21156.3	39791.8
		-84.7982	61173.9	-7094.19	3605.7	80381.5			-84.7975	-22196.1	-10454.3	21378.6	40119.6
		-84.798	61229.8	-7089.75	3617.62	80453.7			-84.7973	-22192.6	-10443.1	21409.5	40165.1
		-84.7967	61579.2	-7061.94	3692.26	80905.6			-84.796	-22170.8	-10373.3	21602.6	40449.8
		-84.7952	61987.8	-7029.33	3779.57	81434.1			-84.7945	-22145.2	-10291.6	21828.1	40782.6
		-84.795	62045.4	-7024.72	3791.88	81508.6			-84.7943	-22141.6	-10280.1	21859.8	40829.4
		-84.7937	62399.8	-6996.33	3867.65	81967.2			-84.793	-22119.3	-10209.3	22055.2	41117.9
		-84.7922	62815.2	-6962.96	3956.5	82504.8			-84.7915	-22093.2	-10126.4	22283.9	41455.7
		-84.792	62874.6	-6958.18	3969.2	82581.7			-84.7913	-22089.4	-10114.5	22316.6	41504
		-84.7907	63234.1	-6929.21	4046.13	83047.1			-84.79	-22066.7	-10042.7	22514.3	41796.1
		-84.7892	63656.5	-6895.06	4136.55	83594.1			-84.7885	-22040	-9958.41	22746.3	42139.2
		-84.789	63717.8	-6890.1	4149.66	83673.4			-84.7883	-22036.1	-9946.19	22779.9	42188.9
		-84.7877	64082.5	-6860.52	4227.76	84145.9			-84.787	-22013	-9873.41	22979.9	42484.8
		-84.7863	64512.1	-6825.57	4319.79	84702.4			-84.7855	-21985.6	-9787.72	23215.3	42833.2
		-84.786	64575.3	-6820.43	4333.32	84784.2			-84.7853	-21981.6	-9775.13	23249.8	42884.4
		-84.7848	64945.3	-6790.22	4412.63	85263.8			-84.784	-21958	-9701.33	23452.3	43184.2
		-84.7833	65382.2	-6754.44	4506.3	85830.1			-84.7825	-21930.1	-9614.24	23691	43538
		-84.783	65447.3	-6749.1	4520.26	85914.6			-84.7823	-21925.9	-9601.27	23726.6	43590.7
		-84.7818	65822.8	-6718.25	4600.81	86401.4			-84.781	-21901.8	-9526.44	23931.5	43894.5
		-84.7803	66267.1	-6681.62	4696.16	86977.8			-84.7795	-21873.3	-9437.91	24173.7	44253.8
		-84.78	66334.2	-6676.08	4710.57	87064.8			-84.7793	-21868.9	-9424.54	24210.2	44308
		-84.7788	66715.3	-6644.56	4792.37	87559.2			-84.778	-21844.4	-9348.66	24417.6	44615.9
		-84.7773	67167.3	-6607.06	4889.45	88145.8			-84.7765	-21815.1	-9258.67	24663.3	44980.8
		-84.777	67236.4	-6601.3	4904.31	88235.5			-84.7763	-21810.7	-9244.9	24700.9	45036.7
		-84.7758	67623.1	-6569.1	4987.41	88737.5			-84.775	-21785.6	-9167.93	24910.8	45348.6
		-84.7743	68082.9	-6530.69	5086.25	89334.6			-84.7735	-21755.7	-9076.44	25160.2	45719.3
		-84.774	68154.2	-6524.72	5101.58	89427.2			-84.7733	-21751	-9062.26	25198.8	45776.8
		-84.7728	68546.7	-6491.81	5186	89937			-84.772	-21725.4	-8984.19	25411.3	46093
		-84.7713	69014.5	-6452.46	5286.65	90544.8			-84.7706	-21694.8	-8891.17	25664.3	46469.6
		-84.771	69088	-6446.27	5302.47	90640.3			-84.7703	-21690	-8876.56	25704	46528.7
		-84.7698	69486.3	-6412.63	5388.23	91158			-84.7691	-21663.9	-8797.38	25919.1	46849.2
		-84.7683	69962.3	-6372.31	5490.74	91776.8			-84.7676	-21632.6	-8702.79	26175.9	47231.8
		-84.768	70038	-6365.88	5507.05	91875.3			-84.7673	-21627.6	-8687.74	26216.7	47292.6
		-84.7668	70442.4	-6331.5	5594.19	92401.2			-84.7661	-21600.9	-8607.41	26434.5	47617.4
		-84.7653	70926.7	-6290.18	5698.6	93031.3			-84.7646	-21568.9	-8511.22	26695	48006.2
		-84.765	71004.8	-6283.51	5715.43	93132.8			-84.7643	-21563.7	-8495.73	26737	48068.8
		-84.7638	71415.3	-6248.35	5803.98	93667			-84.7631	-21536.5	-8414.22	26957.5	48398.1
		-84.7623	71908.2	-6206	5910.34	94308.6			-84.7616	-21503.6	-8316.4	27221.9	48793.1
		-84.762	71988.6	-6199.07	5927.7	94413.3			-84.7613	-21498.3	-8300.44	27265	48857.6
		-84.7608	72405.4	-6163.12	6017.69	94956.1			-84.7601	-21470.5	-8217.74	27488.3	49191.4
		-84.7593	72907	-6119.7	6126.04	95609.5			-84.7586	-21436.9	-8118.24	27756.7	49592.9
		-84.759	72989.9	-6112.51	6143.94	95717.4			-84.7583	-21431.3	-8101.81	27801	49659.1
		-84.7578	73413.1	-6075.73	6235.41	96268.9			-84.7571	-21402.9	-8017.89	28027.1	49997.6
		-84.7563	73923.7	-6031.21	6345.81	96934.4			-84.7556	-21368.5	-7916.68	28299.5	50405.6
		-84.756	74009.1	-6023.75	6364.28	97045.7			-84.7553	-21362.7	-7899.76	28345	50473.8
		-84.7548	74438.9	-5986.12	6457.25	97606.1			-84.7541	-21333.7	-7814.6	28573.9	50817
		-84.7533	74958.7	-5940.45	6569.75	98284.1			-84.7526	-21298.4	-7711.63	28850.5	51231.7
		-84.753	75046.6	-5932.71	6588.79	98398.8			-84.7523	-21292.4	-7694.21	28897.2	51301.9
		-84.7518	75483.1	-5894.2	6683.32	98968.3			-84.7511	-21262.8	-7607.78	29129.1	51649.9
		-84.7503	76012.2	-5847.35	6797.97	99659			-84.7496	-21226.6	-7503.02	29409.9	52071.5
		-84.75	76102.9	-5839.31	6817.61	99777.3			-84.7493	-21220.5	-7485.08	29457.9	52143.7
		-84.7488	76546.2	-5799.9	6913.71	100356			-84.7481	-21190.1	-7397.35	29692.7	52496.6
		-84.7473	77085	-5751.83	7030.57	101060			-84.7466	-21153.1	-7290.76	29977.8	52925.2
		-84.747	77178.3	-5743.48	7050.82	101182			-84.7463	-21146.7	-7272.29	30027.1	52999.4
		-84.7458	77628.6	-5703.13	7148.55	101770			-84.7451	-21115.7	-7183.23	30265	53357.4
		-84.7443	78177.2	-5653.8	7267.67	102487			-84.7436	-21077.7	-7074.76	30554.4	53793.2
		-84.744	78273.4	-5645.13	7288.56	102613			-84.7433	-21071.1	-7055.75	30605.1	53869.5
		-84.7428	78730.9	-5603.81	7387.95	103211			-84.7421	-21039.4	-6965.33	30846	54232.6
		-84.7413	79289.6	-5553.16	7509.39	103942			-84.7406	-21000.5	-6854.94	31139.9	54675.8
		-84.741	79388.6	-5544.16	7530.93	104071			-84.7403	-20993.6	-6835.37	31192	54754.3
		-84.7398	79853.4	-5501.85	7632.02	104680			-84.7391	-20961.1	-6743.57	31436	55122.6
		-84.7383	80422.4	-5449.84	7755.84	105425			-84.7376	-20921.3	-6631.21	31734.5	55573.3
		-84.738	80524.5	-5440.49	7778.05	105558			-84.7373	-20914.1	-6611.06	31787.9	55654.1
		-84.7368	80996.7	-5397.14	7880.88	106177			-84.7361	-20880.9	-6517.84	32035.2	56027.7
		-84.7353	81576.3	-5343.73	8007.16	106936			-84.7346	-20840	-6403.47	32338.3	56486.1
		-84.735	81681.4	-5334.02	8030.06	107074			-84.7343	-20832.6	-6382.73	32393.2	56569.1
		-84.7338	82161.3	-5289.6	8134.67	107702			-84.7331	-20798.6	-6288.06	32643.7	56948.3
		-84.7323	82751.7	-5234.74	8263.46	108477			-84.7316	-20756.7	-6171.62	32951.5	57414.5
		-84.732	82860	-5224.65	8287.08	108619			-84.7313	-20749	-6150.28	33007.9	57499.9
		-84.7308	83347.7	-5179.12	8393.52	109258			-84.7301	-20714.2	-6054.13	33261.7	57884.7
		-84.7293	83949.2	-5122.74	8524.88	110047			-84.7286	-20671.2	-5935.58	33574.4	58358.9
		-84.729	84060.8	-5112.26	8549.25	110194			-84.7283	-20663.2	-5913.6	33632.3	58446.8
		-84.7278	84556.4	-5065.59	8657.56	110844			-84.7271	-20627.6	-5815.95	33889.5	58837.2
		-84.7263	85169.3	-5007.65	8791.57	111649			-84.7256	-20583.5	-5695.23	34207.1	59319.7
		-84.726	85284.2	-4996.76	8816.69	111800			-84.7253	-20575.2	-5672.61	34266.6	59410.1
		-84.7248	85788.1	-4948.9	8926.93	112462			-84.7241	-20538.8	-5573.41	34527.2	59806.3
		-84.7233	86412.7	-4889.33	9063.65	113283			-84.7226	-20493.4	-5450.47	34849.9	60297.2
		-84.723	86531	-4878.01	9089.56	113439			-84.7223	-20484.8	-5427.18	34910.9	60390.2
		-84.7218	87043.2	-4828.92	9201.77	114112			-84.7211	-20447.5	-5326.4	35175.1	60792.4
		-84.7203	87679.7	-4767.67	9341.29	114949			-84.7196	-20401	-5201.19	35502.8	61291.9
		-84.72	87801.6	-4755.91	9368.01	115110			-84.7193	-20392.1	-5177.22	35565.6	61387.5
		-84.7188	88322.4	-4705.54	9482.23	115795			-84.7181	-20353.9	-5074.82	35833.3	61795.9
		-84.7173	88971.2	-4642.54	9624.62	116649			-84.7166	-20306.1	-4947.28	36166.3	62304.2
		-84.717	89096.7	-4630.31	9652.18	116815			-84.7163	-20296.8	-4922.61	36230.7	62402.6
		-84.7158	89626.2	-4578.63	9768.47	117512			-84.7151	-20257.7	-4818.56	36502	62817.1
		-84.7143	90287.6	-4513.81	9913.81	118384			-84.7136	-20208.6	-4688.63	36840.4	63334.5
		-84.714	90416.9	-4501.1	9942.24	118554			-84.7133	-20199	-4663.23	36906.5	63435.7
		-84.7128	90955.3	-4448.05	10060.7	119264			-84.7121	-20158.8	-4557.49	37181.6	63856.6
		-84.7113	91629.6	-4381.33	10209	120153			-84.7106	-20108.4	-4425.11	37525.5	64383.3
		-84.711	91762.8	-4368.12	10238.3	120329			-84.7103	-20098.4	-4398.97	37593.4	64487.3
		-84.7098	92310.4	-4313.65	10358.9	121052			-84.7091	-20057.3	-4291.49	37872.2	64914.7
		-84.7083	92997.9	-4244.97	10510.4	121959			-84.7076	-20005.5	-4156.61	38221.7	65450.9
		-84.708	93135.1	-4231.23	10540.7	122141			-84.7073	-19995.1	-4129.69	38291.4	65557.9
		-84.7068	93692.1	-4175.29	10663.5	122876			-84.7061	-19952.9	-4020.45	38574	65992
		-84.7053	94393.1	-4104.57	10818.2	123803			-84.7046	-19899.7	-3882.99	38929.3	66537.9
		-84.705	94534.5	-4090.27	10849.4	123990			-84.7043	-19888.9	-3855.29	39000.8	66647.9
		-84.7038	95101.1	-4032.8	10974.5	124739			-84.7031	-19845.6	-3744.22	39287.4	67088.8
		-84.7023	95816	-3959.96	11132.5	125685			-84.7016	-19790.9	-3604.13	39648.5	67644.8
		-84.702	95961.6	-3945.09	11164.7	125877			-84.7013	-19779.7	-3575.61	39721.9	67757.9
		-84.7008	96538.1	-3886.03	11292.1	126640			-84.7001	-19735.3	-3462.69	40012.5	68205.8
		-84.6993	97267.3	-3810.98	11453.5	127606			-84.6986	-19679	-3319.89	40379.6	68772
		-84.699	97417.3	-3795.5	11486.7	127805			-84.6983	-19667.4	-3290.53	40455	68888.4
		-84.6978	98003.8	-3734.8	11616.6	128582			-84.6971	-19621.9	-3175.71	40749.6	69343.4
		-84.6963	98747.7	-3657.45	11781.5	129568			-84.6956	-19563.9	-3030.13	41122.8	69920
		-84.696	98902.2	-3641.34	11815.7	129773			-84.6953	-19551.8	-2999.9	41200.2	70039.8
		-84.6948	99499	-3578.92	11948.1	130564			-84.6941	-19505.1	-2883.14	41499	70502.1
		-84.6933	100258	-3499.19	12116.5	131571			-84.6926	-19445.5	-2734.71	41878.4	71089.5
		-84.693	100417	-3482.41	12151.9	131783			-84.6923	-19432.9	-2703.59	41957.9	71212.6
		-84.6918	101025	-3418.22	12286.8	132589			-84.6911	-19385	-2584.83	42261	71682.4
		-84.6903	101799	-3335.98	12458.9	133618			-84.6896	-19323.6	-2433.48	42646.7	72280.9
		-84.69	101963	-3318.52	12495.4	133836			-84.6893	-19310.6	-2401.44	42728.3	72407.6
		-84.6888	102581	-3252.47	12632.9	134658			-84.6881	-19261.3	-2280.64	43035.7	72885
		-84.6873	103371	-3167.64	12808.9	135709			-84.6866	-19198.1	-2126.29	43428	73494.9
		-84.687	103540	-3149.45	12846.5	135933			-84.6863	-19184.6	-2093.3	43511.7	73625.1
		-84.6858	104170	-3081.47	12986.7	136771			-84.6851	-19134	-1970.41	43823.6	74110.5
		-84.6844	104976	-2993.94	13166.6	137845			-84.6836	-19068.9	-1812.97	44222.5	74731.9
		-84.684	105150	-2974.99	13205.4	138077			-84.6833	-19054.8	-1779.01	44308.5	74865.9
		-84.6829	105791	-2905.01	13348.4	138930			-84.6821	-19002.8	-1653.97	44624.8	75359.3
		-84.6814	106614	-2814.64	13532.3	140028			-84.6806	-18935.8	-1493.37	45030.5	75992.7
		-84.681	106793	-2794.9	13572.4	140267			-84.6803	-18921.1	-1458.4	45118.8	76130.6
		-84.6799	107446	-2722.83	13718.2	141137			-84.6791	-18867.7	-1331.16	45439.7	76632.1
		-84.6784	108286	-2629.52	13906.3	142259			-84.6776	-18798.6	-1167.32	45852.4	77277.8
		-84.678	108471	-2608.94	13947.6	142506			-84.6773	-18783.4	-1131.31	45943	77419.6
		-84.6769	109135	-2534.69	14096.4	143393			-84.6761	-18728.5	-1001.82	46268.7	77929.7
		-84.6754	109993	-2438.31	14288.7	144540			-84.6746	-18657.2	-834.637	46688.5	78587.9
		-84.675	110184	-2416.85	14331.4	144794			-84.6743	-18641.4	-797.556	46781.5	78733.8
		-84.6739	110860	-2340.33	14483.2	145699			-84.6731	-18584.9	-665.754	47111.9	79252.5
		-84.6724	111736	-2240.74	14679.9	146872			-84.6716	-18511.5	-495.145	47539	79923.7
		-84.672	111932	-2218.35	14723.9	147134			-84.6713	-18495	-456.957	47634.5	80073.8
		-84.6709	112622	-2139.48	14878.8	148057			-84.6701	-18436.9	-322.786	47969.8	80601.4
		-84.6694	113516	-2036.52	15080.1	149256			-84.6686	-18361.1	-148.655	48404.3	81285.8
		-84.669	113719	-2013.18	15125.6	149527			-84.6683	-18344	-109.326	48502.4	81440.4
		-84.6679	114421	-1931.83	15283.7	150469			-84.6672	-18284.2	27.2739	48842.6	81977
		-84.6664	115335	-1825.36	15489.6	151695			-84.6657	-18206	205.025	49284.8	82675.1
		-84.666	115543	-1801	15536.6	151975			-84.6653	-18188.2	245.534	49385.5	82834.1
		-84.6649	116258	-1717.08	15697.9	152935			-84.6642	-18126.6	384.624	49730.8	83380.1
		-84.6634	117192	-1606.95	15908.7	154190			-84.6627	-18045.9	566.096	50180.8	84092.2
		-84.663	117407	-1581.52	15957.2	154478			-84.6623	-18027.3	607.821	50284.1	84255.9
		-84.6619	118135	-1494.91	16121.9	155459			-84.6612	-17964	749.467	50634.7	84811.5
		-84.6604	119089	-1380.93	16337.6	156742			-84.6597	-17880.7	934.764	51092.6	85538
		-84.66	119311	-1354.38	16387.7	157040			-84.6593	-17861.3	977.745	51198.7	85706.4
		-84.6589	120053	-1264.96	16555.9	158040			-84.6582	-17796	1122.01	51554.6	86271.8
		-84.657	121256	-1119.23	16828.5	159662			-84.6567	-17710	1311.24	52020.6	87013.2
		-84.654	123244	-875.682	17279.9	162345			-84.6563	-17689.8	1355.52	52129.6	87186.6
		-84.651	125277	-623.337	17742.3	165092			-84.6552	-17622.6	1502.48	52490.9	87762.1
		-84.648	127354	-361.765	18215.9	167905			-84.6537	-17533.7	1695.76	52965.3	88518.6
		-84.645	129478	-90.5077	18701.1	170785			-84.6533	-17512.6	1741.38	53077.1	88697.2
		-84.642	131650	190.914	19198.4	173736			-84.6522	-17443.3	1891.1	53443.9	89283
		-84.639	133872	483.016	19708.1	176759			-84.6507	-17351.5	2088.54	53926.9	90055.3
		-84.636	136144	786.346	20230.7	179857			-84.6503	-17329.5	2135.54	54041.8	90239.1
		-84.633	138468	1101.49	20766.6	183033			-84.6492	-17258	2288.1	54414.2	90835.6
		-84.63	140847	1429.06	21316.2	186288			-84.6477	-17163.1	2489.82	54905.9	91624
		-84.627	143281	1769.72	21880	189627			-84.6473	-17140.2	2538.25	55023.9	91813.2
		-84.624	145772	2124.19	22458.6	193051			-84.6462	-17066.5	2693.73	55402.1	92420.7
		-84.621	148322	2493.2	23052.3	196563			-84.6447	-16968.2	2899.86	55902.8	93225.7
		-84.618	150933	2877.59	23661.9	200168			-84.6443	-16944.3	2949.76	56023.8	93420.6
		-84.615	153606	3278.2	24287.8	203868			-84.6432	-16868.3	3108.23	56408	94039.2
		-84.612	156344	3695.96	24930.5	207667			-84.6417	-16766.6	3318.89	56917.8	94861.4
		-84.609	159149	4131.86	25590.9	211567			-84.6413	-16741.7	3370.32	57042.2	95062.1
		-84.606	162022	4586.97	26269.3	215574			-84.6402	-16663.2	3531.87	57432.3	95692.3
		-84.603	164966	5062.45	26966.7	219692			-84.6387	-16558	3747.2	57951.6	96532.1
		-84.6	167984	5559.5	27683.6	223923			-84.6383	-16532	3800.21	58079.2	96738.8
		-84.597	171077	6079.47	28420.8	228273			-84.6372	-16450.9	3964.92	58475.6	97380.9
		-84.594	174248	6623.78	29179	232747			-84.6357	-16341.9	4185.06	59004.4	98238.8
		-84.591	177500	7193.97	29959.1	237349			-84.6353	-16314.8	4239.7	59135.5	98451.8
		-84.588	180834	7791.71	30761.9	242084			-84.6342	-16231	4407.66	59538.1	99106.1
		-84.585	184255	8418.81	31588.3	246958			-84.6327	-16118.1	4632.75	60076.8	99982.8
		-84.582	187765	9077.21	32439.3	251977			-84.6323	-16089.8	4689.08	60211.5	100202
		-84.579	191366	9769.03	33315.8	257147			-84.6312	-16003.2	4860.37	60620.5	100869
		-84.576	195062	10496.6	34218.8	262473			-84.6297	-15886.2	5090.57	61169.3	101765
		-84.573	198856	11262.3	35149.5	267964			-84.6293	-15856.6	5148.64	61307.6	101991
		-84.57	202752	12069	36108.9	273626			-84.6282	-15767.1	5323.37	61723.2	102671
		-84.567	206752	12919.6	37098.3	279466			-84.6267	-15645.8	5558.82	62282.4	103587
		-84.564	210861	13817.4	38119	285494			-84.6263	-15614.8	5618.7	62424.4	103820
		-84.561	215083	14765.8	39172.1	291717			-84.6252	-15522.2	5796.96	62846.7	104513
		-84.558	219420	15768.8	40259.2	298144			-84.6237	-15396.4	6037.83	63416.5	105449
		-84.555	223878	16830.7	41381.8	304787			-84.6233	-15364	6099.58	63562.3	105689
		-84.552	228460	17956.1	42541.3	311654			-84.6222	-15268.2	6281.47	63991.6	106396
		-84.549	233172	19150.2	43739.4	318758			-84.6207	-15137.6	6527.93	64572.1	107354
		-84.546	238017	20418.7	44977.9	326110			-84.6203	-15103.7	6591.61	64721.9	107601
		-84.543	243001	21767.9	46258.5	333723			-84.6192	-15004.5	6777.24	65158.2	108322
		-84.54	248128	23204.7	47583.2	341612			-84.6177	-14868.9	7029.46	65749.9	109302
		-84.537	253404	24737	48954.1	349791			-84.6173	-14833.5	7095.14	65903.8	109557
		-84.534	258834	26373.4	50373.3	358276			-84.6162	-14730.8	7284.62	66347.3	110292
		-84.531	264423	28123.4	51843.1	367086			-84.6147	-14589.9	7542.78	66950.4	111295
		-84.528	270179	29997.9	53366	376239			-84.6143	-14552.8	7610.53	67108.5	111558
		-84.525	276107	32008.9	54944.5	385757			-84.6132	-14446.3	7803.97	67559.3	112308
		-84.522	282213	34170	56581.3	395661			-84.6117	-14300	8068.26	68174.1	113334
		-84.519	288505	36496.3	58279.4	405977			-84.6113	-14261.1	8138.16	68336.5	113605
		-84.516	294989	39005.3	60041.8	416732			-84.6102	-14150.7	8335.68	68794.9	114371
		-84.513	301672	41716.5	61871.8	427957			-84.6087	-13998.5	8606.29	69421.6	115421
		-84.51	308563	44652.1	63773	439684			-84.6083	-13957.8	8678.41	69588.5	115700
		-84.507	315669	47837.5	65749.1	451952			-84.6072	-13843.3	8880.13	70054.5	116483
		-84.504	322999	51301.9	67804	464801			-84.6057	-13685	9157.27	70693.6	117557
		-84.501	330561	55078.7	69941.9	478278			-84.6053	-13642.2	9231.7	70865	117846
		-84.498	338365	59206.4	72167.5	492435			-84.6042	-13523.4	9437.75	71339	118645
		-84.495	346419	63729.9	74485.5	507330			-84.6027	-13358.6	9721.62	71990.7	119745
		-84.492	354734	68701.1	76901.1	523032			-84.6023	-13313.8	9798.44	72166.8	120043
		-84.489	363321	74180.8	79419.9	539617			-84.6012	-13190.5	10008.9	72648.8	120859
		-84.486	372189	80240.8	82047.8	557173			-84.5997	-13018.8	10299.8	73313.4	121986
		-84.483	381350	86965.3	84791.1	575803			-84.5993	-12971.8	10379.1	73494.3	122293
		-84.48	390816	94454.9	87656.8	595624			-84.5982	-12843.7	10594.2	73984.6	123126
		-84.477	400599	102829	90652.3	616777			-84.5967	-12664.8	10892.2	74662.5	124281
		-84.474	410712	112233	93785.3	639426			-84.5963	-12615.4	10974.1	74848.5	124598
		-84.471	421168	122841	97064.4	663769			-84.5952	-12482.2	11193.9	75347.2	125450
		-84.468	431980	134866	100499	690041			-84.5937	-12295.8	11499.3	76038.7	126634
		-84.465	443164	148570	104099	718528			-84.5933	-12243.9	11583.9	76229.8	126961
		-84.462	454733	164278	107875	749582			-84.5922	-12105.4	11808.6	76737.2	127832
		-84.459	466704	182399	111838	783637			-84.5907	-11910.9	12121.7	77442.7	129045
		-84.456	479093	203445	116002	821236			-84.5903	-11856.3	12209	77639	129383
		-84.453	491916	228076	120380	863067			-84.5892	-11712.2	12438.8	78155.3	130273
		-84.45	505190	257142	124986	910015			-84.5877	-11509.1	12759.8	78875.1	131517
		-84.447	518935	291761	129838	963229			-84.5873	-11451.8	12850	79076.9	131866
		-84.444	533167	333414	134952	1.02423e+06			-84.5862	-11301.6	13084.9	79602.3	132777
		-84.441	547907	384105	140348	1.09506e+06			-84.5847	-11089.6	13414.2	80336.8	134053
		-84.438	563174	446586	146046	1.1785e+06			-84.5843	-11029.2	13507.3	80544.3	134414
		-84.435	578988	524706	152070	1.27846e+06			-84.5832	-10872.8	13747.7	81078.9	135345
		-84.432	595371	623963	158446	1.40048e+06			-84.5813	-10587.6	14181.6	82041.8	137027
		-84.429	612344	752381	165199	1.55262e+06			-84.5783	-10125.8	14873.4	83570.3	139709
		-84.426	629928	921937	172362	1.74692e+06			-84.5753	-9642.49	15583.4	85130.7	142463
		-84.423	648147	1.15092e+06	179967	2.00173e+06			-84.5723	-9136.34	16312.2	86723.9	145291
		-84.42	667023	1.46777e+06	188052	2.34554e+06			-84.5693	-8605.9	17060.4	88350.6	148196
		-84.417	686578	1.91708e+06	196657	2.82301e+06			-84.5663	-8049.59	17828.7	90011.8	151182
		-84.414	706836	2.56718e+06	205828	3.50254e+06			-84.5633	-7465.7	18617.9	91708.6	154252
		-84.411	727821	3.51145e+06	215615	4.47758e+06			-84.5603	-6852.38	19428.7	93441.8	157409
		-84.408	749554	4.82662e+06	226074	5.82495e+06			-84.5573	-6207.62	20262	95212.5	160658
		-84.405	772060	6.38591e+06	237268	7.41794e+06			-84.5543	-5529.24	21118.6	97021.7	164002
		-84.402	795359	7.52324e+06	249267	8.59056e+06			-84.5513	-4814.86	21999.3	98870.6	167446
		-84.399	819473	7.3464e+06	262149	8.45072e+06			-84.5483	-4061.89	22905	100760	170995
		-84.396	844424	6.01687e+06	276002	7.15999e+06			-84.5453	-3267.51	23836.7	102692	174652
		-84.393	870229	4.48006e+06	290925	5.66391e+06			-84.5423	-2428.63	24795.5	104666	178424
		-84.39	896906	3.25455e+06	307031	4.48119e+06			-84.5393	-1541.86	25782.4	106685	182317
		-84.387	924470	2.38946e+06	324446	3.66107e+06			-84.5363	-603.507	26798.4	108750	186336
		-84.384	952934	1.79487e+06	343315	3.11381e+06			-84.5333	390.513	27844.7	110862	190488
		-84.381	982307	1.38229e+06	363803	2.75109e+06			-84.5303	1444.68	28922.6	113022	194780
		-84.378	1.01259e+06	1.08969e+06	386098	2.51107e+06			-84.5273	2563.94	30033.3	115231	199220
		-84.375	1.0438e+06	876979	410416	2.35389e+06			-84.5243	3753.75	31178.3	117492	203816
		-84.372	1.07591e+06	718594	437005	2.25421e+06			-84.5213	5020.16	32358.8	119806	208576
		-84.369	1.10893e+06	598030	466154	2.19581e+06			-84.5183	6369.87	33576.3	122174	213512
		-84.366	1.14283e+06	504422	498197	2.16814e+06			-84.5153	7810.34	34832.6	124599	218633
		-84.3652	1.15269e+06	481494	507956	2.16484e+06			-84.5123	9349.85	36129.1	127081	223951
		-84.3637	1.17007e+06	444924	525658	2.16335e+06			-84.5093	10997.7	37467.7	129622	229479
		-84.363	1.17759e+06	430452	533523	2.16426e+06			-84.5063	12764.2	38850.1	132225	235231
		-84.3622	1.18766e+06	412204	544265	2.16682e+06			-84.5033	14661.1	40278.3	134891	241222
		-84.36	1.21317e+06	371080	572589	2.17954e+06			-84.5003	16701.5	41754.4	137622	247469
		-84.357	1.24955e+06	322759	615930	2.21093e+06			-84.4973	18900.1	43280.5	140421	253992
		-84.354	1.28665e+06	282940	664180	2.25646e+06			-84.4943	21273.8	44858.9	143288	260812
		-84.351	1.32441e+06	249763	718092	2.31496e+06			-84.4913	23841.4	46491.9	146228	267952
		-84.348	1.36276e+06	221843	778566	2.38587e+06			-84.4883	26624.7	48182.2	149241	275439
		-84.345	1.40161e+06	198134	846678	2.46912e+06			-84.4853	29648.5	49932.5	152330	283302
		-84.342	1.44084e+06	177839	923731	2.5651e+06			-84.4823	32941.1	51745.6	155498	291576
		-84.339	1.48033e+06	160335	1.01131e+06	2.67467e+06			-84.4793	36535.3	53624.5	158747	300298
		-84.336	1.51995e+06	145137	1.11133e+06	2.79912e+06			-84.4763	40468.7	55572.5	162080	309512
		-84.333	1.55954e+06	131860	1.22619e+06	2.94028e+06			-84.4733	44785.4	57592.9	165499	319268
		-84.33	1.59892e+06	120194	1.3588e+06	3.10061e+06			-84.4703	49536.4	59689.5	169007	329625
		-84.327	1.63792e+06	109891	1.51281e+06	3.28331e+06			-84.4673	54781.8	61866.1	172608	340648
		-84.324	1.67631e+06	100747	1.69279e+06	3.49255e+06			-84.4643	60592.2	64126.8	176305	352415
		-84.321	1.7139e+06	92595.6	1.90447e+06	3.73366e+06			-84.4613	67051.1	66475.9	180099	365018
		-84.318	1.75043e+06	85298.3	2.15508e+06	4.0135e+06			-84.4583	74258.1	68918.1	183996	378564
		-84.315	1.78568e+06	78740.5	2.45372e+06	4.34083e+06			-84.4553	82332.5	71458.5	187998	393180
		-84.312	1.81939e+06	72825.9	2.81188e+06	4.72679e+06			-84.4523	91418	74102.3	192109	409020
		-84.309	1.8513e+06	67473.3	3.24389e+06	5.18536e+06			-84.4493	101689	76855.2	196332	426267
		-84.306	1.88116e+06	62613.9	3.76726e+06	5.73373e+06			-84.4463	113359	79723.3	200671	445145
		-84.303	1.90871e+06	58189.2	4.40258e+06	6.39218e+06			-84.4433	126692	82713	205131	465927
		-84.3	1.93372e+06	54148.8	5.17214e+06	7.1827e+06			-84.4403	142014	85831.3	209715	488952
		-84.297	1.95595e+06	50449.8	6.09579e+06	8.12489e+06			-84.4373	159737	89085.7	214428	514643
		-84.294	1.97518e+06	47054.7	7.18173e+06	9.22667e+06			-84.4343	180382	92484.2	219275	543532
		-84.291	1.99123e+06	43931.2	8.40903e+06	10466900			-84.4313	204615	96035.4	224259	576301
		-84.288	2.00393e+06	41051.3	9.70174e+06	11769400			-84.4283	233304	99748.5	229386	613830
		-84.285	2.01315e+06	38390.2	10905000	12979300			-84.4253	267585	103634	234660	657270
		-84.282	2.01879e+06	35926.4	11793000	13870400			-84.4223	308970	107701	240087	708150
		-84.279	2.02078e+06	33640.9	12142100	14219200			-84.4193	359505	111963	245673	768533
		-84.276	2.01912e+06	31516.9	11850400	13923700			-84.4163	421994	116432	251423	841239
		-84.273	2.01382e+06	29539.6	11003600	13069600			-84.4133	500348	121121	257342	930202
		-84.27	2.00492e+06	27695.8	9.81916e+06	11874500			-84.4103	600117	126045	263436	1.04099e+06
		-84.267	1.99254e+06	25973.7	8.52691e+06	10568100			-84.4073	729301	131219	269713	1.18163e+06
		-84.264	1.97679e+06	24363	7.28936e+06	9.31322e+06			-84.4043	899594	136662	276178	1.36383e+06
		-84.261	1.95785e+06	22854.2	6.18892e+06	8.19232e+06			-84.4013	1.12821e+06	142392	282839	1.60483e+06
		-84.258	1.93589e+06	21438.8	5.25039e+06	7.23041e+06			-84.3983	1.44025e+06	148429	289701	1.92977e+06
		-84.255	1.91112e+06	20109.5	4.46741e+06	6.42134e+06			-84.3953	1.87066e+06	154795	296773	2.37362e+06
		-84.252	1.88379e+06	18859.2	3.82067e+06	5.74602e+06			-84.3923	2.46092e+06	161515	304062	2.97789e+06
		-84.249	1.85413e+06	17682	3.28791e+06	5.18242e+06			-84.3893	3.23562e+06	168616	311576	3.7672e+06
		-84.246	1.8224e+06	16572.2	2.84828e+06	4.70995e+06			-84.3863	4.12809e+06	176126	319322	4.67492e+06
		-84.243	1.78885e+06	15524.8	2.48397e+06	4.31104e+06			-84.3833	4.864e+06	184077	327309	5.42678e+06
		-84.24	1.75373e+06	14535.1	2.18038e+06	3.97134e+06			-84.3809	5.05422e+06	190709	333809	5.63013e+06
		-84.237	1.7173e+06	13599.1	1.92577e+06	3.67937e+06			-84.3803	5.02669e+06	192505	335545	5.60613e+06
		-84.234	1.67981e+06	12712.9	1.71084e+06	3.42605e+06			-84.3773	4.49942e+06	201448	344040	5.0963e+06
		-84.231	1.64148e+06	11873	1.5282e+06	3.20424e+06			-84.3743	3.62795e+06	210949	352802	4.2431e+06
		-84.228	1.60253e+06	11076.3	1.372e+06	3.0083e+06			-84.3713	2.78285e+06	221054	361841	3.41713e+06
		-84.225	1.56317e+06	10319.9	1.23759e+06	2.83378e+06			-84.3683	2.11078e+06	231815	371167	2.76515e+06
		-84.222	1.52359e+06	9601.1	1.12124e+06	2.67713e+06			-84.3653	1.61441e+06	243291	380789	2.28989e+06
		-84.219	1.48397e+06	8917.44	1.01995e+06	2.53554e+06			-84.3623	1.25469e+06	255546	390717	1.95234e+06
		-84.216	1.44446e+06	8266.69	931319	2.40674e+06			-84.3593	992672	268650	400963	1.71368e+06
		-84.213	1.4052e+06	7646.76	853369	2.28891e+06			-84.3563	799006	282684	411537	1.54462e+06
		-84.21	1.36632e+06	7055.73	784492	2.18056e+06			-84.3533	653282	297736	422449	1.42486e+06
		-84.207	1.32791e+06	6491.85	723365	2.08047e+06			-84.3503	541618	313908	433711	1.34063e+06
		-84.204	1.29009e+06	5953.48	668889	1.98763e+06			-84.3473	454558	331310	445334	1.28259e+06
		-84.201	1.25293e+06	5439.09	620151	1.90121e+06			-84.3443	385587	350071	457330	1.24438e+06
		-84.198	1.21649e+06	4947.29	576387	1.82052e+06			-84.3413	330144	370334	469711	1.22158e+06
		-84.195	1.18083e+06	4476.77	536952	1.74495e+06			-84.3405	316659	376261	473226	1.21754e+06
		-84.192	1.14599e+06	4026.34	501302	1.67401e+06			-84.339	294264	387235	479613	1.2125e+06
		-84.189	1.11201e+06	3594.85	468974	1.60727e+06			-84.3383	284985	392261	482487	1.21112e+06
		-84.186	1.07891e+06	3181.26	439574	1.54436e+06			-84.3375	273953	398660	486101	1.2101e+06
		-84.183	1.04671e+06	2784.6	412762	1.48495e+06			-84.336	255480	410559	492691	1.21012e+06
		-84.18	1.01543e+06	2403.95	388246	1.42877e+06			-84.3353	247763	416037	495670	1.21086e+06
		-84.177	985054	2038.47	365775	1.37556e+06			-84.3345	238635	422959	499386	1.21237e+06
		-84.174	955597	1687.36	345129	1.32511e+06			-84.333	223236	435889	506186	1.2167e+06
		-84.171	927050	1349.88	326118	1.27721e+06			-84.3323	216750	441873	509273	1.21929e+06
		-84.168	899403	1025.32	308575	1.2317e+06			-84.3293	190658	470012	523306	1.23537e+06
		-84.165	872645	713.051	292355	1.18841e+06			-84.3263	168512	500729	537781	1.25841e+06
		-84.162	846761	412.447	277328	1.1472e+06			-84.3233	149563	534345	552710	1.28801e+06
		-84.159	821733	122.936	263381	1.10793e+06			-84.3203	133231	571229	568102	1.32395e+06
		-84.156	797542	-156.018	250413	1.0705e+06			-84.3173	119059	611812	583967	1.36623e+06
		-84.153	774169	-424.925	238337	1.03478e+06			-84.3143	106686	656593	600317	1.41499e+06
		-84.15	751591	-684.259	227072	1.00068e+06			-84.3113	95822.7	706159	617158	1.47053e+06
		-84.147	729788	-934.471	216548	968097			-84.3083	86234.1	761200	634500	1.53332e+06
		-84.144	708736	-1175.98	206701	936957			-84.3053	77730	822530	652348	1.604e+06
		-84.141	688411	-1409.19	197476	907174			-84.3023	70153.8	891116	670708	1.68337e+06
		-84.138	668792	-1634.48	188821	878675			-84.2993	63375.9	968112	689584	1.77246e+06
		-84.135	649855	-1852.19	180690	851389			-84.2963	57288.6	1.0549e+06	708977	1.87256e+06
		-84.132	631577	-2062.67	173042	825253			-84.2933	51801.7	1.15315e+06	728888	1.98523e+06
		-84.129	613935	-2266.23	165840	800205			-84.2903	46839	1.26488e+06	749314	2.11242e+06
		-84.126	596907	-2463.17	159050	776190			-84.2873	42336.1	1.39254e+06	770250	2.25651e+06
		-84.123	580471	-2653.77	152642	753154			-84.2843	38238.3	1.53914e+06	791688	2.42045e+06
		-84.12	564605	-2838.31	146586	731049			-84.2813	34498.4	1.70838e+06	813614	2.60788e+06
		-84.117	549288	-3017.04	140859	709826			-84.2783	31076.2	1.90481e+06	836015	2.82329e+06
		-84.114	534501	-3190.2	135436	689443			-84.2753	27936.7	2.13409e+06	858871	3.07229e+06
		-84.111	520223	-3358.02	130297	669858			-84.2723	25049.8	2.4032e+06	882155	3.3618e+06
		-84.108	506434	-3520.71	125422	651032			-84.2693	22389.2	2.7208e+06	905841	3.70042e+06
		-84.105	493117	-3678.48	120794	632928			-84.2663	19931.9	3.09755e+06	929891	4.09877e+06
		-84.102	480254	-3831.54	116395	615514			-84.2633	17657.7	3.54639e+06	954266	4.5697e+06
		-84.099	467826	-3980.06	112213	598754			-84.2603	15549	4.08264e+06	978918	5.1285e+06
		-84.096	455817	-4124.22	108231	582620			-84.2573	13590.1	4.72363e+06	1.00379e+06	5.79241e+06
		-84.093	444211	-4264.19	104439	567082			-84.2543	11767.1	5.48717e+06	1.02883e+06	6.57916e+06
		-84.09	432993	-4400.14	100823	552112			-84.2513	10067.9	6.38779e+06	1.05396e+06	7.50321e+06
		-84.087	422147	-4532.21	97373.7	537684			-84.2483	8481.48	7.42928e+06	1.07911e+06	8.56827e+06
		-84.084	411659	-4660.55	94080.6	523775			-84.2453	6998.09	8.59163e+06	1.1042e+06	9.75422e+06
		-84.081	401515	-4785.3	90934.5	510360			-84.2423	5609.04	9.8128e+06	1.12913e+06	10998900
		-84.078	391702	-4906.6	87926.8	497419			-84.2393	4306.5	10972100	1.15382e+06	12181600
		-84.075	382208	-5024.56	85049.4	484929			-84.2363	3083.44	11892800	1.17814e+06	13125500
		-84.072	373019	-5139.31	82295.1	472871			-84.2333	1933.55	12386200	1.202e+06	13641500
		-84.069	364124	-5250.97	79656.9	461226			-84.2303	851.101	12331800	1.22527e+06	13609300
		-84.066	355512	-5359.64	77128.3	449977			-84.2273	-169.059	11743600	1.24784e+06	13042700
		-84.063	347173	-5465.44	74703.4	439107			-84.2243	-1131.62	10761700	1.26957e+06	12081600
		-84.06	339095	-5568.45	72376.7	428599			-84.2213	-2040.82	9.57826e+06	1.29034e+06	10918000
		-84.057	331269	-5668.79	70142.8	418439			-84.2183	-2900.54	8.36097e+06	1.31003e+06	9.71949e+06
		-84.054	323685	-5766.53	67997	408611			-84.2153	-3714.29	7.21862e+06	1.3285e+06	8.59479e+06
		-84.051	316334	-5861.77	65934.7	399103			-84.2123	-4485.29	6.20361e+06	1.34562e+06	7.59614e+06
		-84.048	309208	-5954.6	63951.5	389901			-84.2093	-5216.48	5.33011e+06	1.36128e+06	6.73757e+06
		-84.045	302297	-6045.09	62043.6	380992			-84.2063	-5910.55	4.59144e+06	1.37535e+06	6.01228e+06
		-84.042	295595	-6133.33	60207.2	372365			-84.2033	-6569.96	3.97198e+06	1.38774e+06	5.40454e+06
		-84.039	289093	-6219.38	58438.7	364009			-84.2003	-7196.99	3.45383e+06	1.39834e+06	4.89636e+06
		-84.036	282784	-6303.31	56734.8	355912			-84.1973	-7793.72	3.01997e+06	1.40707e+06	4.47063e+06
		-84.033	276661	-6385.21	55092.5	348064			-84.1943	-8362.06	2.65552e+06	1.41385e+06	4.1124e+06
		-84.03	270717	-6465.12	53508.8	340457			-84.1913	-8903.79	2.348e+06	1.41863e+06	3.80911e+06
		-84.027	264946	-6543.13	51980.9	333080			-84.1883	-9420.55	2.08716e+06	1.42137e+06	3.5505e+06
		-84.024	259341	-6619.27	50506.4	325924			-84.1853	-9913.83	1.86469e+06	1.42204e+06	3.32821e+06
		-84.021	253896	-6693.63	49082.6	318981			-84.1823	-10385	1.67389e+06	1.42065e+06	3.13554e+06
		-84.018	248607	-6766.24	47707.4	312244			-84.1793	-10835.5	1.50932e+06	1.41719e+06	2.96708e+06
		-84.015	243466	-6837.17	46378.5	305703			-84.1763	-11266.4	1.36663e+06	1.41171e+06	2.81846e+06
		-84.012	238469	-6906.46	45093.9	299353			-84.1733	-11678.8	1.24224e+06	1.40424e+06	2.6862e+06
		-84.009	233612	-6974.17	43851.6	293185			-84.1703	-12073.8	1.13329e+06	1.39486e+06	2.56746e+06
		-84.006	228888	-7040.34	42649.8	287194			-84.1673	-12452.3	1.03738e+06	1.38363e+06	2.45995e+06
		-84.003	224294	-7105.03	41486.8	281372			-84.1643	-12815.3	952598	1.37064e+06	2.36181e+06
		-84	219825	-7168.26	40361	275714			-84.1613	-13163.6	877318	1.356e+06	2.27155e+06
		-83.997	215477	-7230.1	39270.7	270213			-84.1583	-13498	810209	1.33982e+06	2.18792e+06
		-83.994	211245	-7290.57	38214.4	264865			-84.1553	-13819.1	750158	1.32222e+06	2.10995e+06
		-83.991	207125	-7349.72	37190.9	259663			-84.1523	-14127.8	696229	1.30331e+06	2.0368e+06
		-83.988	203115	-7407.59	36198.6	254602			-84.1493	-14424.6	647633	1.28323e+06	1.96783e+06
		-83.985	199210	-7464.21	35236.5	249678			-84.1463	-14710.1	603701	1.26211e+06	1.90249e+06
		-83.982	195407	-7519.61	34303.2	244886			-84.1433	-14984.9	563866	1.24007e+06	1.84034e+06
		-83.979	191702	-7573.84	33397.7	240222			-84.1403	-15249.5	527641	1.21724e+06	1.78103e+06
		-83.976	188092	-7626.93	32518.8	235680			-84.1373	-15504.5	494610	1.19375e+06	1.72425e+06
		-83.973	184574	-7678.91	31665.6	231257			-84.1343	-15750.2	464412	1.16972e+06	1.66977e+06
		-83.97	181145	-7729.8	30836.9	226948			-84.1313	-15987.2	436736	1.14526e+06	1.6174e+06
		-83.967	177803	-7779.64	30032	222751			-84.1283	-16215.8	411314	1.12048e+06	1.56697e+06
		-83.964	174544	-7828.46	29249.8	218661			-84.1253	-16436.4	387908	1.09548e+06	1.51835e+06
		-83.961	171365	-7876.28	28489.6	214675			-84.1223	-16649.4	366315	1.07036e+06	1.47142e+06
		-83.958	168265	-7923.14	27750.5	210789			-84.1193	-16855.2	346353	1.04521e+06	1.4261e+06
		-83.955	165241	-7969.06	27031.8	207000			-84.1163	-17054	327864	1.0201e+06	1.3823e+06
		-83.952	162290	-8014.05	26332.7	203304			-84.1133	-17246.2	310707	995113	1.33997e+06
		-83.949	159410	-8058.16	25652.5	199700			-84.1103	-17432	294759	970309	1.29903e+06
		-83.946	156599	-8101.39	24990.5	196184			-84.1073	-17611.8	279910	945748	1.25944e+06
		-83.943	153855	-8143.78	24346.1	192753			-84.1043	-17785.8	266061	921481	1.22115e+06
		-83.94	151176	-8185.35	23718.7	189405			-84.1013	-17954.2	253127	897553	1.18412e+06
		-83.937	148559	-8226.11	23107.7	186137			-84.0983	-18117.3	241027	874004	1.1483e+06
		-83.934	146004	-8266.08	22512.5	182946			-84.0953	-18275.4	229693	850865	1.11367e+06
		-83.931	143507	-8305.3	21932.6	179831			-84.0923	-18428.5	219062	828166	1.08019e+06
		-83.928	141068	-8343.77	21367.4	176788			-84.0893	-18576.9	209077	805928	1.04782e+06
		-83.925	138685	-8381.52	20816.5	173816			-84.0863	-18720.8	199687	784170	1.01653e+06
		-83.922	136356	-8418.56	20279.4	170912			-84.0833	-18860.5	190847	762906	986283
		-83.919	134079	-8454.91	19755.6	168075			-84.0803	-18995.9	182513	742147	957055
		-83.916	131853	-8490.58	19244.7	165303			-84.0773	-19127.4	174649	721899	928813
		-83.913	129676	-8525.61	18746.3	162593			-84.0743	-19255.1	167220	702168	901525
		-83.91	127548	-8559.99	18260	159944			-84.0713	-19379	160195	682955	875162
		-83.907	125466	-8593.75	17785.3	157354			-84.0683	-19499.4	153545	664259	849695
		-83.9066	125192	-8598.19	17723	157013			-84.0653	-19616.5	147243	646078	825096
		-83.9051	124172	-8614.79	17490.9	155745			-84.0623	-19730.2	141267	628407	801335
		-83.904	123430	-8626.89	17322	154821			-84.0593	-19840.8	135594	611240	778385
		-83.9036	123164	-8631.23	17261.6	154490			-84.0563	-19948.3	130204	594571	756218
		-83.9021	122166	-8647.53	17035	153250			-84.0533	-20052.9	125079	578391	734808
		-83.901	121437	-8659.45	16869.6	152343			-84.0503	-20154.6	120202	562691	714129
		-83.9006	121179	-8663.67	16811.1	152023			-84.0473	-20253.7	115556	547462	694155
		-83.8991	120203	-8679.68	16589.8	150809			-84.0443	-20350.1	111128	532692	674862
		-83.898	119488	-8691.42	16427.8	149920			-84.0413	-20443.9	106905	518372	656224
		-83.8976	119237	-8695.54	16371.1	149609			-84.0383	-20535.4	102873	504490	638219
		-83.8961	118282	-8711.26	16155	148422			-84.0353	-20624.4	99021.8	491034	620823
		-83.895	117580	-8722.83	15996.3	147550			-84.0323	-20711.2	95340.5	477994	604015
		-83.8946	117337	-8726.84	15941.4	147247			-84.0293	-20795.7	91819.4	465357	587772
		-83.8931	116401	-8742.29	15730.2	146085			-84.0263	-20878.2	88449.2	453112	572074
		-83.892	115713	-8753.68	15574.8	145230			-84.0233	-20958.5	85221.6	441247	556901
		-83.8916	115476	-8757.59	15521.5	144936			-84.0203	-21036.9	82128.5	429751	542234
		-83.8901	114561	-8772.77	15315.2	143799			-84.0173	-21113.3	79162.7	418612	528052
		-83.889	113885	-8783.99	15163	142960			-84.0143	-21187.9	76317.3	407819	514339
		-83.8886	113655	-8787.81	15111.3	142675			-84.0113	-21260.7	73585.8	397360	501077
		-83.8871	112759	-8802.72	14909.7	141562			-84.0083	-21331.7	70962.3	387226	488248
		-83.886	112095	-8813.78	14760.5	140738			-84.0053	-21401	68441.2	377405	475837
		-83.8856	111872	-8817.5	14710.4	140461			-84.0023	-21468.7	66017.2	367888	463827
		-83.8841	110995	-8832.15	14513.3	139372			-83.9993	-21534.8	63685.5	358663	452205
		-83.883	110343	-8843.04	14367.1	138563			-83.9963	-21599.4	61441.3	349721	440955
		-83.8826	110126	-8846.67	14318.5	138294			-83.9933	-21662.5	59280.4	341053	430063
		-83.8811	109267	-8861.07	14125.9	137228			-83.9903	-21724.1	57198.8	332649	419515
		-83.88	108627	-8871.81	13982.5	136434			-83.9873	-21784.3	55192.5	324501	409300
		-83.8796	108416	-8875.34	13935.4	136172			-83.9843	-21843.2	53258.1	316599	399405
		-83.8781	107575	-8889.5	13747.1	135128			-83.9813	-21900.8	51392	308935	389817
		-83.877	106946	-8900.08	13606.5	134349			-83.9783	-21957	49591.3	301500	380526
		-83.8766	106742	-8903.53	13560.8	134095			-83.9753	-22012.1	47852.7	294288	371520
		-83.8751	105917	-8917.44	13376.6	133072			-83.9723	-22065.9	46173.6	287289	362789
		-83.874	105300	-8927.87	13238.8	132307			-83.9693	-22118.5	44551.3	280498	354322
		-83.8736	105101	-8931.23	13194.5	132060			-83.9663	-22170	42983.2	273906	346111
		-83.8721	104293	-8944.91	13014.3	131059			-83.9633	-22220.5	41466.9	267508	338145
		-83.871	103687	-8955.19	12879.2	130307			-83.9603	-22269.8	40000.1	261295	330416
		-83.8706	103494	-8958.47	12836.1	130067			-83.9573	-22318.1	38580.9	255262	322916
		-83.8691	102702	-8971.91	12659.9	129086			-83.9543	-22365.4	37207	249402	315635
		-83.868	102107	-8982.05	12527.4	128348			-83.9513	-22411.7	35876.7	243711	308567
		-83.8676	101919	-8985.24	12485.6	128115			-83.9483	-22457	34588	238181	301703
		-83.8661	101143	-8998.47	12313.2	127154			-83.9453	-22501.4	33339.3	232807	295036
		-83.865	100558	-9008.46	12183.1	126429			-83.9423	-22544.9	32129	227585	288560
		-83.8646	100376	-9011.57	12142.6	126203			-83.9393	-22587.5	30955.5	222508	282267
		-83.8631	99615.4	-9024.58	11973.9	125261			-83.9363	-22629.3	29817.2	217573	276152
		-83.862	99040.2	-9034.43	11846.3	124548			-83.9333	-22670.2	28712.9	212773	270207
		-83.8616	98862.9	-9037.47	11807	124329			-83.9303	-22710.3	27641.2	208105	264428
		-83.8602	98117.9	-9050.25	11641.9	123406			-83.9273	-22749.6	26600.7	203565	258807
		-83.859	97552.6	-9059.97	11516.7	122705			-83.9243	-22788.2	25590.4	199147	253341
		-83.8587	97380.3	-9062.93	11478.5	122492			-83.9213	-22826	24609.1	194849	248023
		-83.8572	96649.9	-9075.51	11316.9	121587			-83.9183	-22863	23655.6	190665	242849
		-83.856	96094.3	-9085.09	11194	120899			-83.9153	-22899.4	22728.9	186593	237814
		-83.8557	95926.8	-9087.98	11157	120692			-83.9123	-22935	21828	182628	232912
		-83.8542	95210.8	-9100.35	10998.7	119805			-83.9093	-22970	20952.1	178767	228141
		-83.853	94664.5	-9109.8	10878.1	119129			-83.9063	-23004.3	20100.1	175007	223494
		-83.8527	94501.7	-9112.62	10842.1	118927			-83.9033	-23038	19271.2	171344	218969
		-83.8512	93799.7	-9124.78	10687.2	118058			-83.9003	-23071	18464.5	167776	214561
		-83.85	93262.6	-9134.1	10568.8	117393			-83.8973	-23103.4	17679.4	164299	210266
		-83.8497	93104.4	-9136.85	10533.9	117198			-83.8943	-23135.3	16915	160910	206081
		-83.8482	92415.9	-9148.82	10382.2	116345			-83.8913	-23166.5	16170.6	157607	202002
		-83.847	91887.9	-9158.01	10265.9	115692			-83.8883	-23197.2	15445.5	154386	198026
		-83.8467	91734	-9160.7	10232	115501			-83.8853	-23227.3	14739.1	151246	194149
		-83.8452	91058.8	-9172.47	10083.4	114666			-83.8823	-23256.9	14050.7	148183	190368
		-83.844	90539.6	-9181.54	9969.21	114023			-83.8793	-23286	13379.7	145196	186681
		-83.8437	90390	-9184.16	9936.33	113838			-83.8763	-23314.5	12725.5	142282	183084
		-83.8422	89727.7	-9195.74	9790.76	113019			-83.8733	-23342.6	12087.6	139439	179575
		-83.841	89217	-9204.69	9678.61	112387			-83.8703	-23370.1	11465.5	136664	176151
		-83.8407	89071.7	-9207.24	9646.68	112207			-83.8673	-23397.2	10858.6	133956	172808
		-83.8392	88421.9	-9218.65	9504.07	111403			-83.8643	-23423.8	10266.4	131312	169546
		-83.838	87919.7	-9227.47	9393.9	110782			-83.8613	-23449.9	9688.43	128731	166360
		-83.8377	87778.3	-9229.96	9362.9	110607			-83.8583	-23475.6	9124.31	126210	163250
		-83.8362	87140.8	-9241.18	9223.17	109819			-83.8553	-23500.8	8573.56	123748	160212
		-83.835	86646.8	-9249.89	9114.93	109208			-83.8523	-23525.7	8035.77	121344	157245
		-83.8347	86509.4	-9252.32	9084.84	109038			-83.8493	-23550.1	7510.52	118995	154346
		-83.8332	85883.9	-9263.36	8947.9	108265			-83.8463	-23574	6997.44	116699	151514
		-83.832	85397.9	-9271.96	8841.56	107664			-83.8433	-23597.6	6496.15	114456	148746
		-83.8317	85264.3	-9274.32	8812.33	107498			-83.8403	-23620.8	6006.29	112264	146041
		-83.8302	84650.5	-9285.2	8678.11	106739			-83.8373	-23643.7	5527.51	110121	143396
		-83.829	84172.3	-9293.68	8573.62	106148			-83.8343	-23666.1	5059.5	108026	140811
		-83.8287	84042.4	-9295.98	8545.23	105988			-83.8313	-23688.2	4601.91	105977	138282
		-83.8272	83440	-9306.69	8413.67	105243			-83.8283	-23709.9	4154.46	103974	135810
		-83.826	82969.5	-9315.06	8310.97	104661			-83.8253	-23731.3	3716.84	102015	133391
		-83.8257	82843.2	-9317.31	8283.41	104505			-83.825	-23733.5	3670.97	101809	133138
		-83.8242	82251.9	-9327.84	8154.43	103775			-83.8235	-23744	3456.48	100849	131952
		-83.823	81788.9	-9336.11	8053.49	103202			-83.8223	-23752.3	3288.77	100098	131026
		-83.8227	81666.1	-9338.3	8026.72	103051			-83.822	-23754.5	3244.32	99898.7	130780
		-83.8212	81085.6	-9348.67	7900.25	102333			-83.8205	-23764.8	3034.47	98959.1	129620
		-83.82	80630	-9356.83	7801.02	101770			-83.8193	-23773	2869.96	98222.5	128711
		-83.8197	80510.5	-9358.97	7775.02	101623			-83.819	-23775.1	2826.89	98029.6	128473
		-83.8182	79940.7	-9369.18	7651.01	100919			-83.8175	-23785.3	2621.55	97110.2	127338
		-83.817	79492.2	-9377.23	7553.45	100365			-83.8163	-23793.3	2460.16	96387.5	126446
		-83.8167	79376.1	-9379.32	7528.2	100221			-83.816	-23795.4	2418.42	96200.6	126215
		-83.8152	78816.6	-9389.38	7406.58	99529.9			-83.8145	-23805.5	2217.46	95300.8	125104
		-83.814	78375.1	-9397.33	7310.65	98984.5			-83.8133	-23813.4	2059.12	94591.9	124229
		-83.8137	78262.2	-9399.36	7286.12	98845			-83.813	-23815.4	2018.65	94410.7	124005
		-83.8122	77712.8	-9409.27	7166.83	98166.5			-83.8115	-23825.3	1821.96	93530	122918
		-83.811	77278.2	-9417.11	7072.49	97629.7			-83.8103	-23833.1	1666.57	92834.3	122059
		-83.8107	77168.4	-9419.1	7048.67	97494.1			-83.81	-23835.1	1627.35	92658.7	121842
		-83.8092	76628.9	-9428.85	6931.64	96827.7			-83.8085	-23844.8	1434.79	91796.7	120778
		-83.808	76200.9	-9436.6	6838.87	96299.3			-83.8073	-23852.5	1282.28	91113.9	119935
		-83.8077	76094.2	-9438.54	6815.73	96167.5			-83.807	-23854.5	1244.26	90943.7	119725
		-83.8062	75564.3	-9448.15	6700.91	95513.2			-83.8055	-23864	1055.74	90099.8	118683
		-83.805	75143	-9455.8	6609.65	94992.9			-83.8043	-23871.6	906.034	89429.7	117855
		-83.8047	75039.1	-9457.68	6587.18	94864.7			-83.804	-23873.5	869.177	89264.7	117652
		-83.8032	74518.7	-9467.15	6474.51	94222.1			-83.8025	-23882.9	684.562	88438.3	116631
		-83.802	74103.7	-9474.7	6384.75	93709.9			-83.8013	-23890.5	537.593	87780.5	115819
		-83.8017	74002.8	-9476.54	6362.91	93585.3			-83.801	-23892.3	501.864	87620.6	115621
		-83.8002	73491.5	-9485.87	6252.35	92954.1			-83.7995	-23901.6	321.056	86811.4	114622
		-83.799	73082.9	-9493.33	6164.03	92449.7			-83.7983	-23909	176.75	86165.6	113825
		-83.7987	72984.7	-9495.12	6142.82	92328.5			-83.798	-23910.8	142.112	86010.6	113633
		-83.7972	72482.4	-9504.31	6034.31	91708.5			-83.7965	-23919.9	-34.9937	85218	112654
		-83.796	72079.9	-9511.68	5947.41	91211.8			-83.7953	-23927.2	-176.703	84584	111871
		-83.7957	71984.5	-9513.42	5926.81	91094			-83.795	-23929	-210.286	84433.7	111686
		-83.7942	71490.9	-9522.48	5820.3	90484.9			-83.7935	-23938	-383.789	83657.4	110727
		-83.793	71094.5	-9529.75	5734.79	89995.7			-83.7923	-23945.2	-522.967	83034.7	109958
		-83.7927	71001.7	-9531.46	5714.77	89881.1			-83.792	-23946.9	-555.527	82889.1	109778
		-83.7912	70516.7	-9540.38	5610.21	89282.7			-83.7905	-23955.8	-725.525	82128.6	108839
		-83.79	70126.2	-9547.57	5526.06	88800.8			-83.7893	-23962.9	-862.236	81517.1	108083
		-83.7897	70036	-9549.23	5506.61	88689.5			-83.789	-23964.6	-893.805	81375.9	107909
		-83.7882	69559.4	-9558.01	5403.96	88101.4			-83.7875	-23973.3	-1060.39	80630.8	106988
		-83.787	69174.7	-9565.12	5321.13	87626.8			-83.7863	-23980.3	-1194.7	80030.2	106246
		-83.7867	69086.9	-9566.74	5302.24	87518.5			-83.786	-23981.9	-1225.31	79893.3	106077
		-83.7852	68618.5	-9575.4	5201.44	86940.6			-83.7845	-23990.5	-1388.57	79163.2	105175
		-83.784	68239.4	-9582.41	5119.91	86473			-83.7833	-23997.5	-1520.53	78573.2	104446
		-83.7837	68154.1	-9583.99	5101.56	86367.8			-83.783	-23999.1	-1550.21	78440.5	104282
		-83.7822	67693.7	-9592.53	5002.57	85799.8			-83.7815	-24007.5	-1710.24	77725	103399
		-83.781	67320.2	-9599.46	4922.3	85339.1			-83.7803	-24014.4	-1839.91	77145.3	102682
		-83.7807	67237.2	-9601	4904.48	85236.8			-83.78	-24015.9	-1868.69	77016.7	102523
		-83.7792	66784.6	-9609.41	4807.27	84678.6			-83.7785	-24024.3	-2025.57	76315.4	101657
		-83.778	66416.6	-9616.26	4728.24	84224.6			-83.7773	-24031.1	-2153.01	75745.9	100953
		-83.7777	66335.9	-9617.76	4710.92	84125.2			-83.777	-24032.6	-2180.91	75621.2	100799
		-83.7762	65891	-9626.05	4615.44	83576.5			-83.7755	-24040.8	-2334.73	74933.8	99949.6
		-83.775	65528.2	-9632.82	4537.62	83129.1			-83.7743	-24047.5	-2459.98	74374.1	99257.9
		-83.7747	65449.8	-9634.28	4520.8	83032.4			-83.774	-24048.9	-2487.04	74253.2	99108.5
		-83.7732	65012.4	-9642.45	4427	82493			-83.7725	-24057	-2637.87	73579.3	98275.7
		-83.772	64654.8	-9649.14	4350.37	82052.2			-83.7713	-24063.6	-2761	73029.3	97595.9
		-83.7717	64578.6	-9650.57	4334.04	81958.2			-83.771	-24065.1	-2787.23	72912.1	97451.1
		-83.7702	64148.5	-9658.62	4241.89	81427.8			-83.7695	-24073	-2935.15	72251.4	96634.5
		-83.769	63796	-9665.23	4166.41	80993.3			-83.7683	-24079.6	-3056.21	71710.8	95966.3
		-83.7687	63721.9	-9666.62	4150.54	80902			-83.768	-24081	-3081.64	71597.2	95825.9
		-83.7672	63299	-9674.56	4060	80380.5			-83.7665	-24088.8	-3226.73	70949.3	95025.1
		-83.766	62951.5	-9681.09	3985.67	79952.2			-83.7653	-24095.3	-3345.75	70417.9	94368.1
		-83.7657	62879.5	-9682.45	3970.25	79863.4			-83.765	-24096.6	-3370.42	70307.7	94232
		-83.7642	62463.5	-9690.28	3881.29	79350.6			-83.7635	-24104.4	-3512.74	69672.4	93446.6
		-83.763	62121	-9696.73	3808.06	78928.5			-83.7623	-24110.8	-3629.78	69149.9	92800.7
		-83.7627	62051	-9698.05	3793.09	78842.1			-83.762	-24112.1	-3653.7	69043.2	92668.7
		-83.7612	61641.9	-9705.77	3705.66	78337.9			-83.7605	-24119.7	-3793.32	68420.1	91898.3
		-83.76	61304.2	-9712.15	3633.52	77921.7			-83.7593	-24126	-3908.44	67906.4	91263.2
		-83.7597	61236.1	-9713.44	3618.98	77837.8			-83.759	-24127.3	-3931.63	67802.9	91135.3
		-83.7582	60833.7	-9721.05	3533.05	77341.8			-83.7575	-24134.8	-4068.62	67191.7	90379.5
		-83.757	60500.7	-9727.36	3461.98	76931.5			-83.7563	-24141	-4181.85	66686.6	89755
		-83.7568	60434.6	-9728.61	3447.86	76849.9			-83.756	-24142.3	-4204.33	66586.3	89630.9
		-83.7553	60038.7	-9736.12	3363.39	76362.1			-83.7545	-24149.7	-4338.77	65986.6	88889.5
		-83.754	59710.4	-9742.35	3293.36	75957.5			-83.7533	-24155.9	-4450.15	65489.9	88275.2
		-83.7538	59646.1	-9743.58	3279.65	75878.3			-83.753	-24157.1	-4471.95	65392.7	88155
		-83.7523	59256.6	-9750.98	3196.62	75398.4			-83.7515	-24164.4	-4603.89	64804.4	87427.4
		-83.751	58932.8	-9757.14	3127.61	74999.4			-83.7503	-24170.5	-4713.46	64315.8	86823.2
		-83.7508	58870.3	-9758.33	3114.29	74922.4			-83.75	-24171.6	-4734.6	64221.6	86706.7
		-83.7493	58487.2	-9765.63	3032.67	74450.3			-83.7485	-24178.8	-4864.1	63644.3	85992.7
		-83.748	58167.8	-9771.73	2964.66	74056.9			-83.7473	-24184.9	-4971.92	63163.8	85398.3
		-83.7478	58107.1	-9772.89	2951.73	73982			-83.747	-24186	-4992.41	63072.5	85285.4
		-83.7463	57730.1	-9780.09	2871.47	73517.6			-83.7455	-24193.1	-5119.53	62506	84584.7
		-83.745	57415.1	-9786.11	2804.44	73129.5			-83.7443	-24199.1	-5225.63	62033.3	83999.9
		-83.7448	57356.1	-9787.24	2791.88	73056.8			-83.744	-24200.2	-5245.49	61944.8	83890.4
		-83.7433	56985.1	-9794.34	2712.96	72599.8			-83.7425	-24207.2	-5370.3	61388.8	83202.6
		-83.742	56674.4	-9800.3	2646.89	72217.1			-83.7413	-24213.1	-5474.71	60923.8	82627.3
		-83.7418	56617.1	-9801.4	2634.7	72146.5			-83.741	-24214.1	-5493.96	60838	82521.2
		-83.7403	56252	-9808.41	2557.09	71696.8			-83.7396	-24221.1	-5616.51	60292.3	81846
		-83.739	55945.5	-9814.3	2491.96	71319.2			-83.7383	-24226.9	-5719.27	59834.7	81279.9
		-83.7388	55889.8	-9815.37	2480.13	71250.6			-83.7381	-24227.9	-5737.94	59751.6	81177.1
		-83.7373	55530.4	-9822.28	2403.8	70808.1			-83.7366	-24234.7	-5858.27	59215.9	80514.2
		-83.736	55228.1	-9828.1	2339.59	70435.7			-83.7353	-24240.5	-5959.43	58765.7	79957.1
		-83.7358	55174	-9829.15	2328.1	70369			-83.7351	-24241.5	-5977.52	58685.1	79857.4
		-83.7343	54820.3	-9835.97	2253.02	69933.4			-83.7336	-24248.2	-6095.7	58159.2	79206.6
		-83.733	54521.9	-9841.73	2189.72	69566			-83.7323	-24253.9	-6195.28	57716.1	78658.2
		-83.7328	54469.4	-9842.74	2178.56	69501.3			-83.7321	-24254.9	-6212.82	57638.1	78561.7
		-83.7313	54121.2	-9849.47	2104.71	69072.6			-83.7306	-24261.5	-6328.89	57121.7	77922.6
		-83.73	53826.9	-9855.17	2042.29	68710.1			-83.7293	-24267.1	-6426.94	56685.6	77382.9
		-83.7298	53775.8	-9856.15	2031.47	68647.2			-83.7291	-24268.1	-6443.93	56610	77289.3
		-83.7283	53433.1	-9862.79	1958.82	68225.2			-83.7276	-24274.6	-6557.95	56103	76661.7
		-83.727	53142.6	-9868.43	1897.26	67867.6			-83.7263	-24280.2	-6654.49	55673.7	76130.4
		-83.7268	53093	-9869.39	1886.76	67806.5			-83.7261	-24281.1	-6670.96	55600.5	76039.7
		-83.7253	52755.6	-9875.94	1815.28	67391.1			-83.7246	-24287.6	-6782.97	55102.6	75423.3
		-83.724	52469	-9881.51	1754.58	67038.2			-83.7233	-24293.1	-6878.04	54680	74900.2
		-83.7238	52420.8	-9882.45	1744.38	66978.9			-83.7231	-24294	-6893.99	54609.1	74812.4
		-83.7223	52088.6	-9888.91	1674.05	66569.9			-83.7216	-24300.3	-7004.05	54120	74206.9
		-83.721	51805.7	-9894.42	1614.18	66221.6			-83.7203	-24305.8	-7097.67	53704	73691.9
		-83.7208	51759	-9895.33	1604.29	66164			-83.7201	-24306.7	-7113.13	53635.3	73606.8
		-83.7193	51431.9	-9901.71	1535.08	65761.3			-83.7186	-24312.9	-7221.27	53155	73012.1
		-83.718	51152.7	-9907.16	1476.03	65417.6			-83.7173	-24318.3	-7313.48	52745.4	72504.9
		-83.7178	51107.3	-9908.05	1466.43	65361.7			-83.7171	-24319.2	-7328.47	52678.9	72422.5
		-83.7163	50785.1	-9914.35	1398.33	64965.2			-83.7156	-24325.4	-7434.73	52207	71838.2
		-83.715	50509.5	-9919.74	1340.08	64626			-83.7143	-24330.7	-7525.57	51803.7	71338.8
		-83.7148	50465.5	-9920.6	1330.77	64571.8			-83.7141	-24331.5	-7540.08	51739.3	71259
		-83.7133	50148.3	-9926.82	1263.74	64181.3			-83.7126	-24337.6	-7644.52	51275.7	70684.8
		-83.712	49876.2	-9932.15	1206.27	63846.4			-83.7113	-24342.8	-7734	50878.5	70193
		-83.7118	49833.5	-9932.99	1197.24	63793.8			-83.7111	-24343.7	-7748.06	50816.2	70115.7
		-83.7103	49521	-9939.12	1131.27	63409.3			-83.7096	-24349.7	-7850.71	50360.7	69551.5
		-83.709	49252.5	-9944.4	1074.57	63078.7			-83.7083	-24354.9	-7938.87	49969.5	69067.1
		-83.7088	49211	-9945.22	1065.81	63027.7			-83.7081	-24355.7	-7952.48	49909.1	68992.3
		-83.7073	48903.2	-9951.27	1000.87	62648.9			-83.7066	-24361.6	-8053.39	49461.6	68437.8
		-83.706	48638.1	-9956.49	944.932	62322.6			-83.7053	-24366.8	-8140.25	49076.3	67960.6
		-83.7058	48597.8	-9957.29	936.439	62273.1			-83.7051	-24367.5	-8153.44	49017.9	67888.2
		-83.7043	48294.7	-9963.26	872.509	61900.1			-83.7036	-24373.4	-8252.64	48578	67343.3
		-83.703	48032.9	-9968.43	817.311	61577.9			-83.7023	-24378.5	-8338.23	48198.6	66873.2
		-83.7028	47993.9	-9969.2	809.076	61529.9			-83.7021	-24379.2	-8351	48142	66803.1
		-83.7013	47695.3	-9975.1	746.136	61162.4			-83.7006	-24385	-8448.53	47709.7	66267.5
		-83.7	47436.8	-9980.21	691.667	60844.4			-83.6993	-24390	-8532.89	47335.9	65804.3
		-83.6998	47398.9	-9980.96	683.683	60797.7			-83.6991	-24390.8	-8545.24	47281.2	65736.5
		-83.6983	47104.7	-9986.79	621.713	60435.8			-83.6976	-24396.5	-8641.15	46856.3	65210
		-83.697	46849.5	-9991.85	567.958	60121.7			-83.6963	-24401.4	-8724.28	46488	64753.6
		-83.6968	46812.8	-9992.57	560.22	60076.5			-83.6961	-24402.2	-8736.25	46435	64687.9
		-83.6953	46522.9	-9998.33	499.2	59719.9			-83.6946	-24407.8	-8830.55	46017.4	64170.3
		-83.694	46270.9	-10003.3	446.146	59409.8			-83.6933	-24412.7	-8912.5	45654.6	63720.6
		-83.6938	46235.3	-10004	438.647	59366			-83.6931	-24413.4	-8924.08	45603.3	63657.1
		-83.6923	45949.7	-10009.7	378.557	59014.6			-83.6916	-24419	-9016.82	45192.7	63148.2
		-83.691	45700.8	-10014.7	326.19	58708.4			-83.6903	-24423.8	-9097.6	44835.2	62705.1
		-83.6908	45666.2	-10015.4	318.925	58665.9			-83.6901	-24424.5	-9108.8	44785.6	62643.6
		-83.6893	45384.8	-10021	259.747	58319.7			-83.6886	-24430	-9200.03	44381.9	62143.2
		-83.688	45139	-10025.9	208.056	58017.3			-83.6873	-24434.8	-9279.66	44029.6	61706.5
		-83.6878	45105.5	-10026.5	201.018	57976.1			-83.6871	-24435.5	-9290.5	43981.7	61647
		-83.6863	44828.2	-10032.1	142.733	57635			-83.6856	-24440.9	-9380.23	43584.8	61155
		-83.685	44585.4	-10036.9	91.705	57336.3			-83.6843	-24445.6	-9458.74	43237.6	60724.5
		-83.6848	44552.9	-10037.6	84.8885	57296.4			-83.6841	-24446.3	-9469.22	43191.2	60667
		-83.6833	44279.7	-10043	27.4793	56960.2			-83.6826	-24451.6	-9557.49	42800.9	60183.1
		-83.682	44039.8	-10047.8	-22.898	56665.2			-83.6813	-24456.3	-9634.91	42458.7	59758.8
		-83.6818	44008.4	-10048.5	-29.4987	56626.5			-83.6811	-24456.9	-9645.05	42413.9	59703.2
		-83.6803	43739	-10053.9	-86.0499	56295.2			-83.6796	-24462.2	-9731.89	42030	59227.2
		-83.679	43502.1	-10058.6	-135.788	56003.8			-83.6783	-24466.9	-9808.22	41692.7	58808.9
		-83.6788	43471.7	-10059.2	-142.178	55966.3			-83.6781	-24467.5	-9818.03	41649.4	58755.2
		-83.6773	43206.2	-10064.6	-197.888	55639.8			-83.6766	-24472.7	-9903.47	41271.9	58287.1
		-83.676	42972.1	-10069.3	-246.999	55351.9			-83.6753	-24477.3	-9978.75	40939.4	57874.7
		-83.6758	42942.6	-10069.9	-253.184	55315.7			-83.6751	-24477.9	-9988.23	40897.6	57822.7
		-83.6743	42681	-10075.1	-308.07	54993.9			-83.6736	-24483	-10072.3	40526.3	57362.2
		-83.673	42449.7	-10079.8	-356.564	54709.5			-83.6723	-24487.6	-10146.5	40198.5	56955.6
		-83.6728	42421.2	-10080.4	-362.549	54674.3			-83.6721	-24488.1	-10155.7	40158	56905.5
		-83.6713	42163.2	-10085.6	-416.626	54357.1			-83.6706	-24493.2	-10238.4	39792.8	56452.4
		-83.67	41934.7	-10090.2	-464.515	54076.1			-83.6693	-24497.7	-10311.7	39469.6	56051.5
		-83.6698	41907.1	-10090.7	-470.305	54042.2			-83.6691	-24498.3	-10320.5	39430.5	56003
		-83.6683	41652.8	-10095.9	-523.59	53729.4			-83.6676	-24503.3	-10402	39071.2	55557.3
		-83.667	41427.1	-10100.4	-570.885	53451.8			-83.6663	-24507.8	-10474.2	38752.6	55161.9
		-83.6668	41400.3	-10101	-576.485	53419			-83.6661	-24508.3	-10482.7	38714.9	55115.1
		-83.6653	41149.6	-10106.1	-628.992	53110.7			-83.6646	-24513.3	-10562.9	38361.4	54676.5
		-83.664	40926.5	-10110.6	-675.702	52836.4			-83.6633	-24517.7	-10634.1	38047.1	54286.6
		-83.6638	40900.7	-10111.1	-681.117	52804.6			-83.6631	-24518.2	-10642.4	38010.7	54241.4
		-83.6623	40653.5	-10116.1	-732.863	52500.6			-83.6616	-24523.1	-10721.3	37662.9	53809.9
		-83.661	40433	-10120.6	-779	52229.5			-83.6603	-24527.5	-10791.6	37353.1	53425.3
		-83.6608	40408	-10121.1	-784.233	52198.8			-83.6601	-24528	-10799.6	37317.9	53381.7
		-83.6593	40164.3	-10126.1	-835.231	51899.1			-83.6586	-24532.8	-10877.2	36975.7	52957
		-83.658	39946.4	-10130.5	-880.804	51631.2			-83.6573	-24537.1	-10946.6	36670.1	52577.7
		-83.6578	39922.3	-10131	-885.861	51601.5			-83.6571	-24537.6	-10954.3	36636.2	52535.6
		-83.6563	39681.9	-10135.9	-936.126	51306			-83.6556	-24542.4	-11030.7	36299.4	52117.6
		-83.655	39466.6	-10140.3	-981.145	51041.3			-83.6543	-24546.7	-11099.2	35998	51743.5
		-83.6548	39443.2	-10140.7	-986.03	51012.6			-83.6541	-24547.1	-11106.6	35965.3	51702.9
		-83.6534	39206.2	-10145.6	-1035.58	50721.2			-83.6526	-24551.8	-11181.8	35633.8	51291.4
		-83.652	38993.4	-10149.9	-1080.05	50459.5			-83.6513	-24556.1	-11249.4	35336.5	50922.3
		-83.6519	38970.8	-10150.4	-1084.77	50431.8			-83.6511	-24556.5	-11256.5	35305	50883.2
		-83.6504	38737.1	-10155.2	-1133.61	50144.4			-83.6496	-24561.2	-11330.7	34978.8	50478.2
		-83.649	38526.8	-10159.5	-1177.55	49885.8			-83.6483	-24565.4	-11397.3	34685.5	50114.1
		-83.6489	38505	-10159.9	-1182.1	49859			-83.6481	-24565.8	-11404.2	34655.1	50076.4
		-83.6474	38274.4	-10164.6	-1230.25	49575.6			-83.6466	-24570.4	-11477.2	34334	49677.7
[truncated: 152 more rows]
