# Supplementary figures and images for: Allosteric coupling asymmetry mediates paradoxical activation of BRAF by type II inhibitors
Source: eLife journal article supplement (doi:10.7554/elife.95481), 2024-04-03

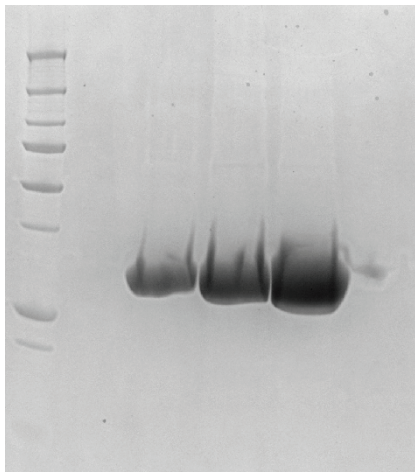

Supplement: fig4-figsupp2-data2 [file elife-95481-fig4-figsupp2-data2-v1.zip]
